# Supplementary material for: Sixteen isostructural phosphonate metal-organic frameworks with controlled Lewis acidity and chemical stability for asymmetric catalysis
Source: PubMed Central journal article supplement (PMC5736719; doi:10.1038/s41467-017-02335-0), 2017-12-19

# checkCIF/PLATON report

You have not supplied any structure factors. As a result the full set of tests cannot be run.

THIS REPORT IS FOR GUIDANCE ONLY. IF USED AS PART OF A REVIEW PROCEDURE FOR PUBLICATION, IT SHOULD NOT REPLACE THE EXPERTISE OF AN EXPERIENCED CRYSTALLOGRAPHIC REFEREE.

No syntax errors found.      CIF dictionary      Interpreting this report

## Datablock: 1-Cr

---

|                                                               |                              |                    |                |
|---------------------------------------------------------------|------------------------------|--------------------|----------------|
| Bond precision:                                               | C-C = 0.0088 A               | Wavelength=1.54178 |                |
| Cell:                                                         | a=26.8122(5)                 | b=29.1445(5)       | c=29.4502(5)   |
|                                                               | alpha=90                     | beta=90            | gamma=90       |
| Temperature:                                                  | 123 K                        |                    |                |
|                                                               | Calculated                   | Reported           |                |
| Volume                                                        | 23013.2(7)                   | 23013.2(7)         |                |
| Space group                                                   | C 2 2 21                     | C222(1)            |                |
| Hall group                                                    | C 2c 2                       | ?                  |                |
| Moiety formula                                                | C74 H71 Cr3 O19 P2, 2(C2 O2) | ?                  |                |
| Sum formula                                                   | C78 H71 Cr3 O23 P2           | C78 H79 Cr3 O23 P2 |                |
| Mr                                                            | 1594.29                      | 1602.35            |                |
| Dx, g cm-3                                                    | 0.920                        | 0.925              |                |
| Z                                                             | 8                            | 8                  |                |
| Mu (mm-1)                                                     | 2.980                        | 2.980              |                |
| F000                                                          | 6600.0                       | 6664.0             |                |
| F000'                                                         | 6620.80                      |                    |                |
| h,k,lmax                                                      | 28,30,31                     | 28,30,31           |                |
| Nref                                                          | 14451[ 7756]                 | 13840              |                |
| Tmin,Tmax                                                     | 0.788,0.836                  | 0.788,0.836        |                |
| Tmin'                                                         | 0.788                        |                    |                |
| Correction method= # Reported T Limits: Tmin=0.788 Tmax=0.836 |                              |                    |                |
| AbsCorr = MULTI-SCAN                                          |                              |                    |                |
| Data completeness=                                            | 1.78/0.96                    | Theta(max)=        | 55.000         |
| R(reflections)=                                               | 0.0893( 13059)               | wR2(reflections)=  | 0.2788( 13840) |
| S =                                                           | 1.158                        | Npar=              | 790            |

---

The following ALERTS were generated. Each ALERT has the format

**test-name\_ALERT\_alert-type\_alert-level.**

Click on the hyperlinks for more details of the test.

---

### 🔴 Alert level A

THETM01\_ALERT\_3\_A The value of sine(theta\_max)/wavelength is less than 0.550  
Calculated sin(theta\_max)/wavelength = 0.5313  
PLAT602\_ALERT\_2\_A VERY LARGE Solvent Accessible VOID(S) in Structure ! Info

---

### 🟡 Alert level B

PLAT035\_ALERT\_1\_B \_chemical\_absolute\_configuration info Not given Please Do !  
PLAT049\_ALERT\_1\_B Calculated Density less than 1.0 gcm-3 ..... 0.9203 Check  
PLAT230\_ALERT\_2\_B Hirshfeld Test Diff for C25 -- C26 .. 8.9 s.u.  
PLAT234\_ALERT\_4\_B Large Hirshfeld Difference C61 -- C64 .. 0.29 Ang.  
PLAT430\_ALERT\_2\_B Short Inter D...A Contact O23 .. O23 .. 2.59 Ang.

---

### 🟢 Alert level C

RFACR01\_ALERT\_3\_C The value of the weighted R factor is > 0.25  
Weighted R factor given 0.279  
PLAT041\_ALERT\_1\_C Calc. and Reported SumFormula Strings Differ Please Check  
PLAT043\_ALERT\_1\_C Calculated and Reported Mol. Weight Differ by .. 8.06 Check  
PLAT068\_ALERT\_1\_C Reported F000 Differs from Calcd (or Missing)... Please Check  
PLAT084\_ALERT\_3\_C High wR2 Value (i.e. > 0.25) ..... 0.28 Report  
PLAT202\_ALERT\_3\_C Isotropic non-H Atoms in Anion/Solvent ..... 8 Check  
PLAT220\_ALERT\_2\_C Large Non-Solvent C Ueq(max)/Ueq(min) Range 4.3 Ratio  
PLAT222\_ALERT\_3\_C Large Non-Solvent H Uiso(max)/Uiso(min) ... 4.5 Ratio  
PLAT230\_ALERT\_2\_C Hirshfeld Test Diff for C14 -- C16 .. 6.9 s.u.  
PLAT230\_ALERT\_2\_C Hirshfeld Test Diff for C46 -- C47 .. 5.2 s.u.  
PLAT234\_ALERT\_4\_C Large Hirshfeld Difference C57 -- C58 .. 0.16 Ang.  
PLAT234\_ALERT\_4\_C Large Hirshfeld Difference C59 -- C60 .. 0.16 Ang.  
PLAT234\_ALERT\_4\_C Large Hirshfeld Difference C61 -- C62 .. 0.20 Ang.  
PLAT234\_ALERT\_4\_C Large Hirshfeld Difference C66 -- C67 .. 0.20 Ang.  
PLAT234\_ALERT\_4\_C Large Hirshfeld Difference C69 -- C72 .. 0.16 Ang.  
PLAT241\_ALERT\_2\_C High 'MainMol' Ueq as Compared to Neighbors of 05 Check  
PLAT241\_ALERT\_2\_C High 'MainMol' Ueq as Compared to Neighbors of 013 Check  
PLAT241\_ALERT\_2\_C High 'MainMol' Ueq as Compared to Neighbors of C58 Check  
PLAT241\_ALERT\_2\_C High 'MainMol' Ueq as Compared to Neighbors of C67 Check  
PLAT242\_ALERT\_2\_C Low 'MainMol' Ueq as Compared to Neighbors of Cr1 Check  
PLAT242\_ALERT\_2\_C Low 'MainMol' Ueq as Compared to Neighbors of Cr3 Check  
PLAT242\_ALERT\_2\_C Low 'MainMol' Ueq as Compared to Neighbors of C25 Check  
PLAT242\_ALERT\_2\_C Low 'MainMol' Ueq as Compared to Neighbors of C50 Check  
PLAT242\_ALERT\_2\_C Low 'MainMol' Ueq as Compared to Neighbors of C59 Check  
PLAT242\_ALERT\_2\_C Low 'MainMol' Ueq as Compared to Neighbors of C66 Check  
PLAT242\_ALERT\_2\_C Low 'MainMol' Ueq as Compared to Neighbors of C69 Check  
PLAT244\_ALERT\_4\_C Low 'Solvent' Ueq as Compared to Neighbors of C75 Check  
PLAT341\_ALERT\_3\_C Low Bond Precision on C-C Bonds ..... 0.00875 Ang.  
PLAT369\_ALERT\_2\_C Long C(sp2)-C(sp2) Bond C10 - C19 .. 1.55 Ang.  
PLAT369\_ALERT\_2\_C Long C(sp2)-C(sp2) Bond C46 - C55 .. 1.53 Ang.

---

### 🟠 Alert level G

FORMU01\_ALERT\_2\_G There is a discrepancy between the atom counts in the  
\_chemical\_formula\_sum and the formula from the \_atom\_site\* data.  
Atom count from \_chemical\_formula\_sum:C78 H79 Cr3 O23 P2  
Atom count from the \_atom\_site data: C78 H71 Cr3 O23 P2  
CELLZ01\_ALERT\_1\_G Difference between formula and atom\_site contents detected.  
CELLZ01\_ALERT\_1\_G WARNING: H atoms missing from atom site list. Is this intentional?  
From the CIF: \_cell\_formula\_units\_Z 8

From the CIF: \_chemical\_formula\_sum C78 H79 Cr3 O23 P2  
 TEST: Compare cell contents of formula and atom\_site data

| atom              | Z*formula                                        | cif sites                        | diff          |             |        |
|-------------------|--------------------------------------------------|----------------------------------|---------------|-------------|--------|
| C                 | 624.00                                           | 624.00                           | 0.00          |             |        |
| H                 | 632.00                                           | 568.00                           | 64.00         |             |        |
| Cr                | 24.00                                            | 24.00                            | 0.00          |             |        |
| O                 | 184.00                                           | 184.00                           | 0.00          |             |        |
| P                 | 16.00                                            | 16.00                            | 0.00          |             |        |
| PLAT002_ALERT_2_G | Number of Distance or Angle Restraints on AtSite |                                  |               | 32          | Note   |
| PLAT004_ALERT_5_G | Polymeric Structure Found with Maximum Dimension |                                  |               | 3           | Info   |
| PLAT005_ALERT_5_G | No Embedded Refinement Details found in the CIF  |                                  |               | Please Do ! |        |
| PLAT033_ALERT_4_G | Flack x Value Deviates > 3.0 * sigma from Zero . |                                  |               | 0.282       | Note   |
| PLAT066_ALERT_1_G | Predicted and Reported Tmin&Tmax Range Identical |                                  |               | ?           | Check  |
| PLAT072_ALERT_2_G | SHELXL First Parameter in WGHT Unusually Large   |                                  |               | 0.23        | Report |
| PLAT232_ALERT_2_G | Hirshfeld Test Diff (M-X)                        | Cr1                              | -- O17 ..     | 5.5         | s.u.   |
| PLAT232_ALERT_2_G | Hirshfeld Test Diff (M-X)                        | Cr1                              | -- O9_c ..    | 10.0        | s.u.   |
| PLAT232_ALERT_2_G | Hirshfeld Test Diff (M-X)                        | Cr2                              | -- O6 ..      | 11.5        | s.u.   |
| PLAT232_ALERT_2_G | Hirshfeld Test Diff (M-X)                        | Cr2                              | -- O14 ..     | 9.3         | s.u.   |
| PLAT232_ALERT_2_G | Hirshfeld Test Diff (M-X)                        | Cr2                              | -- O8_b ..    | 5.7         | s.u.   |
| PLAT232_ALERT_2_G | Hirshfeld Test Diff (M-X)                        | Cr2                              | -- O10_c ..   | 10.0        | s.u.   |
| PLAT232_ALERT_2_G | Hirshfeld Test Diff (M-X)                        | Cr2                              | -- O2_i ..    | 5.7         | s.u.   |
| PLAT232_ALERT_2_G | Hirshfeld Test Diff (M-X)                        | Cr3                              | -- O13 ..     | 8.3         | s.u.   |
| PLAT344_ALERT_2_G | Unusual sp?                                      | Angle Range in Solvent/Ion for . |               | C76         | Check  |
| PLAT344_ALERT_2_G | Unusual sp?                                      | Angle Range in Solvent/Ion for . |               | C78         | Check  |
| PLAT380_ALERT_4_G | Incorrectly? Oriented X(sp2)-Methyl Moiety ..... |                                  |               | C18         | Check  |
| PLAT380_ALERT_4_G | Incorrectly? Oriented X(sp2)-Methyl Moiety ..... |                                  |               | C29         | Check  |
| PLAT380_ALERT_4_G | Incorrectly? Oriented X(sp2)-Methyl Moiety ..... |                                  |               | C54         | Check  |
| PLAT380_ALERT_4_G | Incorrectly? Oriented X(sp2)-Methyl Moiety ..... |                                  |               | C65         | Check  |
| PLAT791_ALERT_4_G | The Model has Chirality at P1                    |                                  | (Chiral SPGR) | S           | Verify |
| PLAT791_ALERT_4_G | The Model has Chirality at P2                    |                                  | (Chiral SPGR) | R           | Verify |
| PLAT860_ALERT_3_G | Number of Least-Squares Restraints .....         |                                  |               | 33          | Note   |
| PLAT899_ALERT_4_G | SHELXL97 is Deprecated and Succeeded by SHELXL   |                                  |               | 2014        | Note   |

- 
- 2 **ALERT level A** = Most likely a serious problem - resolve or explain  
 5 **ALERT level B** = A potentially serious problem, consider carefully  
 30 **ALERT level C** = Check. Ensure it is not caused by an omission or oversight  
 27 **ALERT level G** = General information/check it is not something unexpected
- 8 ALERT type 1 CIF construction/syntax error, inconsistent or missing data  
 32 ALERT type 2 Indicator that the structure model may be wrong or deficient  
 7 ALERT type 3 Indicator that the structure quality may be low  
 15 ALERT type 4 Improvement, methodology, query or suggestion  
 2 ALERT type 5 Informative message, check
-

It is advisable to attempt to resolve as many as possible of the alerts in all categories. Often the minor alerts point to easily fixed oversights, errors and omissions in your CIF or refinement strategy, so attention to these fine details can be worthwhile. In order to resolve some of the more serious problems it may be necessary to carry out additional measurements or structure refinements. However, the purpose of your study may justify the reported deviations and the more serious of these should normally be commented upon in the discussion or experimental section of a paper or in the "special\_details" fields of the CIF. checkCIF was carefully designed to identify outliers and unusual parameters, but every test has its limitations and alerts that are not important in a particular case may appear. Conversely, the absence of alerts does not guarantee there are no aspects of the results needing attention. It is up to the individual to critically assess their own results and, if necessary, seek expert advice.

### **Publication of your CIF in IUCr journals**

A basic structural check has been run on your CIF. These basic checks will be run on all CIFs submitted for publication in IUCr journals (*Acta Crystallographica*, *Journal of Applied Crystallography*, *Journal of Synchrotron Radiation*); however, if you intend to submit to *Acta Crystallographica Section C* or *E*, you should make sure that full publication checks are run on the final version of your CIF prior to submission.

### **Publication of your CIF in other journals**

Please refer to the *Notes for Authors* of the relevant journal for any special instructions relating to CIF submission.

---

**PLATON version of 19/11/2015; check.def file version of 17/11/2015**

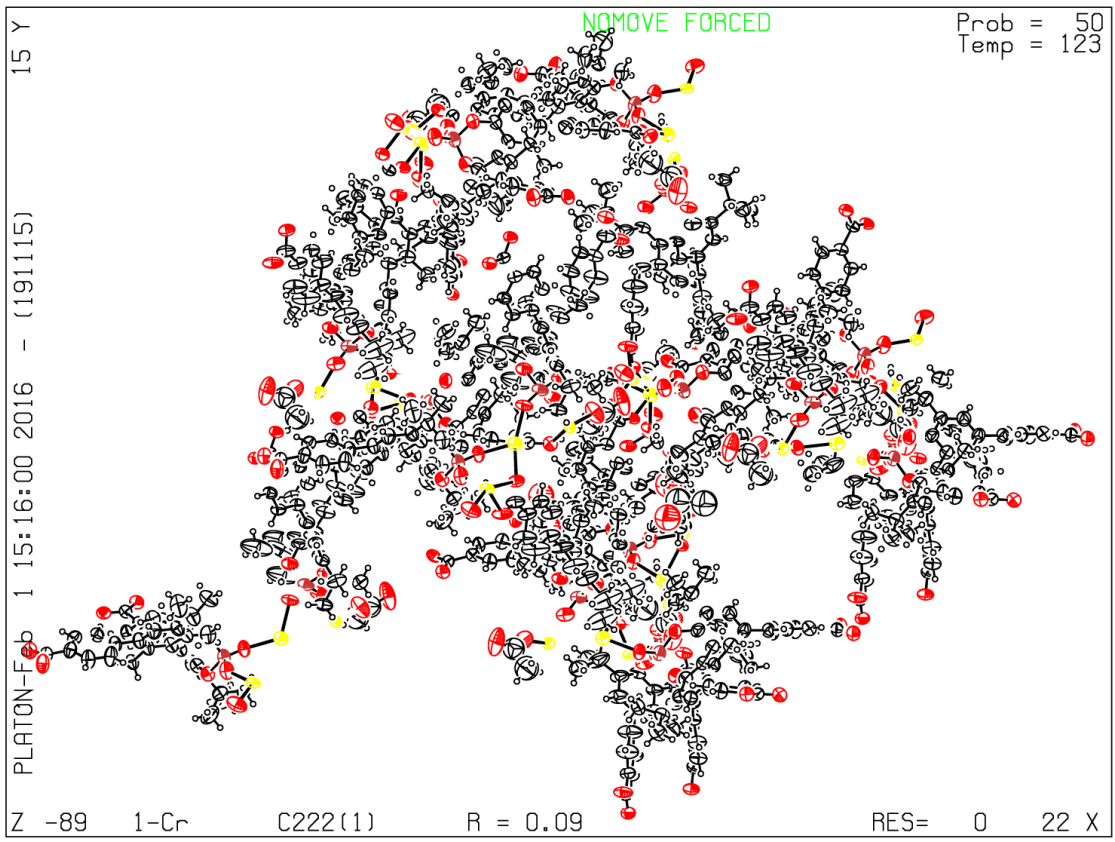



The following ALERTS were generated. Each ALERT has the format

**test-name\_ALERT\_alert-type\_alert-level.**

Click on the hyperlinks for more details of the test.

---

**Alert level A**

PLAT602\_ALERT\_2\_A VERY LARGE Solvent Accessible VOID(S) in Structure ! Info

---

**Alert level B**

PLAT035\_ALERT\_1\_B \_chemical\_absolute\_configuration info Not given Please Do !  
PLAT049\_ALERT\_1\_B Calculated Density less than 1.0 gcm-3 ..... 0.9215 Check  
PLAT213\_ALERT\_2\_B Atom C17 has ADP max/min Ratio .... 4.2 prolat  
PLAT220\_ALERT\_2\_B Large Non-Solvent C Ueq(max)/Ueq(min) Range 6.1 Ratio  
PLAT230\_ALERT\_2\_B Hirshfeld Test Diff for C61 -- C63 .. 9.0 s.u.  
PLAT242\_ALERT\_2\_B Low 'MainMol' Ueq as Compared to Neighbors of C14 Check  
PLAT430\_ALERT\_2\_B Short Inter D...A Contact O23 .. O23 .. 2.58 Ang.

---

**Alert level C**

RFACR01\_ALERT\_3\_C The value of the weighted R factor is > 0.25  
Weighted R factor given 0.256  
PLAT029\_ALERT\_3\_C \_diffrn\_measured\_fraction\_theta\_full Low ..... 0.979 Note  
PLAT041\_ALERT\_1\_C Calc. and Reported SumFormula Strings Differ Please Check  
PLAT043\_ALERT\_1\_C Calculated and Reported Mol. Weight Differ by .. 8.06 Check  
PLAT068\_ALERT\_1\_C Reported F000 Differs from Calcd (or Missing)... Please Check  
PLAT084\_ALERT\_3\_C High wR2 Value (i.e. > 0.25) ..... 0.26 Report  
PLAT202\_ALERT\_3\_C Isotropic non-H Atoms in Anion/Solvent ..... 8 Check  
PLAT213\_ALERT\_2\_C Atom O19 has ADP max/min Ratio .... 4.0 prolat  
PLAT213\_ALERT\_2\_C Atom C61 has ADP max/min Ratio .... 3.5 prolat  
PLAT220\_ALERT\_2\_C Large Non-Solvent O Ueq(max)/Ueq(min) Range 3.3 Ratio  
PLAT222\_ALERT\_3\_C Large Non-Solvent H Uiso(max)/Uiso(min) ... 6.5 Ratio  
PLAT230\_ALERT\_2\_C Hirshfeld Test Diff for C21 -- C22 .. 5.8 s.u.  
PLAT234\_ALERT\_4\_C Large Hirshfeld Difference C25 -- C28 .. 0.16 Ang.  
PLAT234\_ALERT\_4\_C Large Hirshfeld Difference C32 -- C33 .. 0.16 Ang.  
PLAT234\_ALERT\_4\_C Large Hirshfeld Difference C39 -- C40 .. 0.16 Ang.  
PLAT234\_ALERT\_4\_C Large Hirshfeld Difference C59 -- C60 .. 0.16 Ang.  
PLAT234\_ALERT\_4\_C Large Hirshfeld Difference C61 -- C62 .. 0.20 Ang.  
PLAT241\_ALERT\_2\_C High 'MainMol' Ueq as Compared to Neighbors of Ga2 Check  
PLAT241\_ALERT\_2\_C High 'MainMol' Ueq as Compared to Neighbors of 05 Check  
PLAT241\_ALERT\_2\_C High 'MainMol' Ueq as Compared to Neighbors of C40 Check  
PLAT241\_ALERT\_2\_C High 'MainMol' Ueq as Compared to Neighbors of C46 Check  
PLAT242\_ALERT\_2\_C Low 'MainMol' Ueq as Compared to Neighbors of Ga1 Check  
PLAT242\_ALERT\_2\_C Low 'MainMol' Ueq as Compared to Neighbors of Ga3 Check  
PLAT242\_ALERT\_2\_C Low 'MainMol' Ueq as Compared to Neighbors of C25 Check  
PLAT242\_ALERT\_2\_C Low 'MainMol' Ueq as Compared to Neighbors of C50 Check  
PLAT242\_ALERT\_2\_C Low 'MainMol' Ueq as Compared to Neighbors of C59 Check  
PLAT242\_ALERT\_2\_C Low 'MainMol' Ueq as Compared to Neighbors of C61 Check  
PLAT242\_ALERT\_2\_C Low 'MainMol' Ueq as Compared to Neighbors of C73 Check  
PLAT244\_ALERT\_4\_C Low 'Solvent' Ueq as Compared to Neighbors of C75 Check  
PLAT341\_ALERT\_3\_C Low Bond Precision on C-C Bonds ..... 0.0084 Ang.  
PLAT367\_ALERT\_2\_C Long? C(sp?)-C(sp?) Bond C75 - C76 .. 1.57 Ang.

---

**Alert level G**

FORMU01\_ALERT\_2\_G There is a discrepancy between the atom counts in the  
\_chemical\_formula\_sum and the formula from the \_atom\_site\* data.  
Atom count from \_chemical\_formula\_sum:C78 H79 Ga3 O23 P2  
Atom count from the \_atom\_site data: C78 H71 Ga3 O23 P2  
CELLZ01\_ALERT\_1\_G Difference between formula and atom\_site contents detected.  
CELLZ01\_ALERT\_1\_G WARNING: H atoms missing from atom site list. Is this intentional?

From the CIF: \_cell\_formula\_units\_Z 8  
 From the CIF: \_chemical\_formula\_sum C78 H79 Ga3 O23 P2  
 TEST: Compare cell contents of formula and atom\_site data

| atom | Z*formula | cif sites | diff  |
|------|-----------|-----------|-------|
| C    | 624.00    | 624.00    | 0.00  |
| H    | 632.00    | 568.00    | 64.00 |
| Ga   | 24.00     | 24.00     | 0.00  |
| O    | 184.00    | 184.00    | 0.00  |
| P    | 16.00     | 16.00     | 0.00  |

|                   |                                                  |  |        |             |
|-------------------|--------------------------------------------------|--|--------|-------------|
| PLAT002_ALERT_2_G | Number of Distance or Angle Restraints on AtSite |  | 32     | Note        |
| PLAT004_ALERT_5_G | Polymeric Structure Found with Maximum Dimension |  | 3      | Info        |
| PLAT005_ALERT_5_G | No Embedded Refinement Details found in the CIF  |  |        | Please Do ! |
| PLAT033_ALERT_4_G | Flack x Value Deviates > 3.0 * sigma from Zero . |  | -0.090 | Note        |
| PLAT066_ALERT_1_G | Predicted and Reported Tmin&Tmax Range Identical |  |        | ? Check     |
| PLAT072_ALERT_2_G | SHELXL First Parameter in WGHT Unusually Large   |  | 0.15   | Report      |
| PLAT232_ALERT_2_G | Hirshfeld Test Diff (M-X) Ga1 -- O5 ..           |  | 6.0    | s.u.        |
| PLAT232_ALERT_2_G | Hirshfeld Test Diff (M-X) Ga2 -- O6 ..           |  | 18.7   | s.u.        |
| PLAT232_ALERT_2_G | Hirshfeld Test Diff (M-X) Ga2 -- O14 ..          |  | 14.7   | s.u.        |
| PLAT232_ALERT_2_G | Hirshfeld Test Diff (M-X) Ga3 -- O13 ..          |  | 7.0    | s.u.        |
| PLAT344_ALERT_2_G | Unusual sp? Angle Range in Solvent/Ion for .     |  | C76    | Check       |
| PLAT344_ALERT_2_G | Unusual sp? Angle Range in Solvent/Ion for .     |  | C78    | Check       |
| PLAT380_ALERT_4_G | Incorrectly? Oriented X(sp2)-Methyl Moiety ..... |  | C18    | Check       |
| PLAT380_ALERT_4_G | Incorrectly? Oriented X(sp2)-Methyl Moiety ..... |  | C29    | Check       |
| PLAT380_ALERT_4_G | Incorrectly? Oriented X(sp2)-Methyl Moiety ..... |  | C54    | Check       |
| PLAT764_ALERT_4_G | Overcomplete CIF Bond List Detected (Rep/Expd) . |  | 1.10   | Ratio       |
| PLAT791_ALERT_4_G | The Model has Chirality at P1 (Chiral SPGR)      |  |        | R Verify    |
| PLAT791_ALERT_4_G | The Model has Chirality at P2 (Chiral SPGR)      |  |        | S Verify    |
| PLAT860_ALERT_3_G | Number of Least-Squares Restraints .....         |  | 36     | Note        |
| PLAT899_ALERT_4_G | SHELXL97 is Deprecated and Succeeded by SHELXL   |  | 2014   | Note        |

---

1 **ALERT level A** = Most likely a serious problem - resolve or explain  
 7 **ALERT level B** = A potentially serious problem, consider carefully  
 31 **ALERT level C** = Check. Ensure it is not caused by an omission or oversight  
 23 **ALERT level G** = General information/check it is not something unexpected

8 ALERT type 1 CIF construction/syntax error, inconsistent or missing data  
 31 ALERT type 2 Indicator that the structure model may be wrong or deficient  
 7 ALERT type 3 Indicator that the structure quality may be low  
 14 ALERT type 4 Improvement, methodology, query or suggestion  
 2 ALERT type 5 Informative message, check

---



It is advisable to attempt to resolve as many as possible of the alerts in all categories. Often the minor alerts point to easily fixed oversights, errors and omissions in your CIF or refinement strategy, so attention to these fine details can be worthwhile. In order to resolve some of the more serious problems it may be necessary to carry out additional measurements or structure refinements. However, the purpose of your study may justify the reported deviations and the more serious of these should normally be commented upon in the discussion or experimental section of a paper or in the "special\_details" fields of the CIF. checkCIF was carefully designed to identify outliers and unusual parameters, but every test has its limitations and alerts that are not important in a particular case may appear. Conversely, the absence of alerts does not guarantee there are no aspects of the results needing attention. It is up to the individual to critically assess their own results and, if necessary, seek expert advice.

### **Publication of your CIF in IUCr journals**

A basic structural check has been run on your CIF. These basic checks will be run on all CIFs submitted for publication in IUCr journals (*Acta Crystallographica*, *Journal of Applied Crystallography*, *Journal of Synchrotron Radiation*); however, if you intend to submit to *Acta Crystallographica Section C* or *E*, you should make sure that full publication checks are run on the final version of your CIF prior to submission.

### **Publication of your CIF in other journals**

Please refer to the *Notes for Authors* of the relevant journal for any special instructions relating to CIF submission.

---

**PLATON version of 19/11/2015; check.def file version of 17/11/2015**

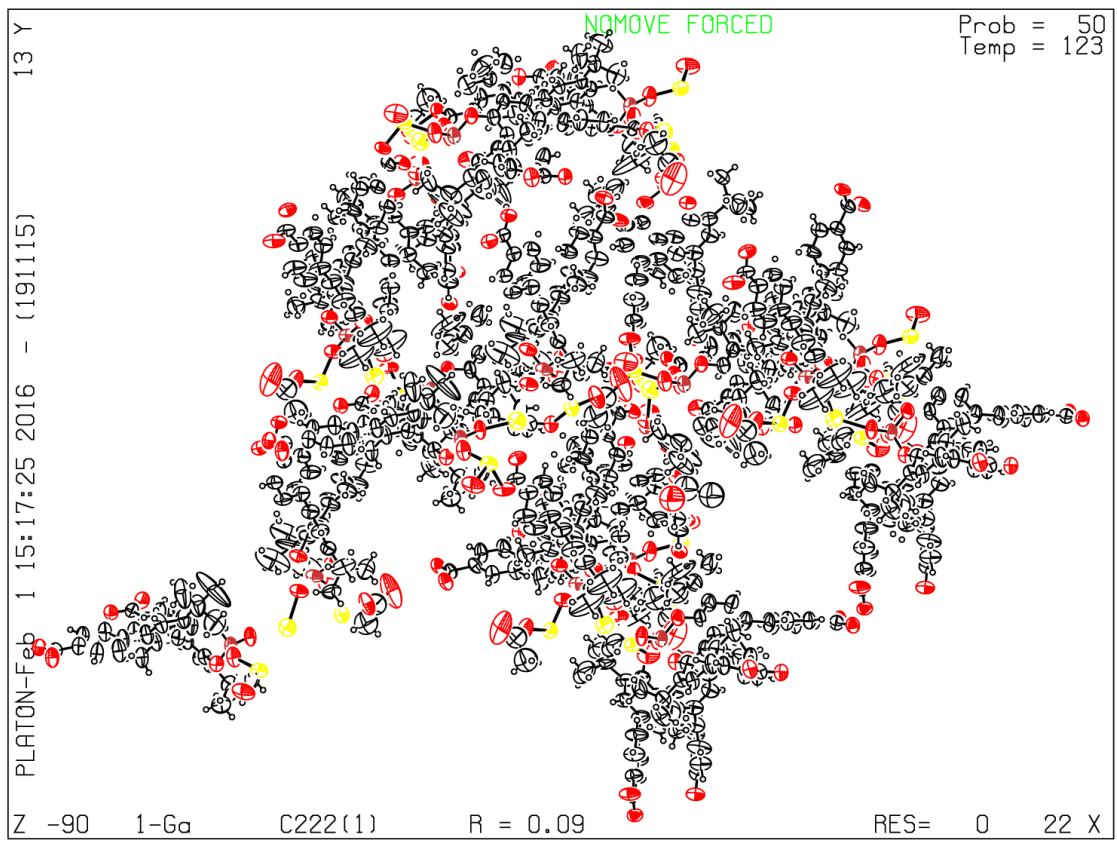

# checkCIF/PLATON report

You have not supplied any structure factors. As a result the full set of tests cannot be run.

THIS REPORT IS FOR GUIDANCE ONLY. IF USED AS PART OF A REVIEW PROCEDURE FOR PUBLICATION, IT SHOULD NOT REPLACE THE EXPERTISE OF AN EXPERIENCED CRYSTALLOGRAPHIC REFEREE.

No syntax errors found.      CIF dictionary      Interpreting this report

## Datablock: 1-Mn

---

Bond precision:    C-C = 0.0082 A                      Wavelength=1.54178

Cell:                      a=27.3307(12)              b=29.1106(12)              c=29.5760(12)  
                                    alpha=90                      beta=90                      gamma=90

Temperature:              123 K

|                | Calculated         | Reported           |
|----------------|--------------------|--------------------|
| Volume         | 23531.1(17)        | 23531.1(17)        |
| Space group    | C 2 2 21           | C222(1)            |
| Hall group     | C 2c 2             | ?                  |
| Moiety formula | C72 H68 Mn3 O18 P2 | ?                  |
| Sum formula    | C72 H68 Mn3 O18 P2 | C72 H72 Mn3 O18 P2 |
| Mr             | 1448.03            | 1452.06            |
| Dx,g cm-3      | 0.817              | 0.820              |
| Z              | 8                  | 8                  |
| Mu (mm-1)      | 3.180              | 3.181              |
| F000           | 5992.0             | 6024.0             |
| F000'          | 6001.34            |                    |
| h,k,lmax       | 30,32,33           | 30,32,33           |
| Nref           | 17495[ 9351]       | 17096              |
| Tmin,Tmax      | 0.764,0.775        | 0.764,0.775        |
| Tmin'          | 0.693              |                    |

Correction method= # Reported T Limits: Tmin=0.764 Tmax=0.775  
AbsCorr = MULTI-SCAN

Data completeness= 1.83/0.98                      Theta(max)= 60.000

R(reflections)= 0.0944( 13248)                      wR2(reflections)= 0.2672( 17096)

S = 1.050                                              Npar= 760

---

The following ALERTS were generated. Each ALERT has the format  
**test-name\_ALERT\_alert-type\_alert-level.**  
Click on the hyperlinks for more details of the test.

---

**Alert level A**PLAT602\_ALERT\_2\_A VERY LARGE Solvent Accessible VOID(S) in Structure ! Info

---

**Alert level B**

THETM01\_ALERT\_3\_B The value of sine(theta\_max)/wavelength is less than 0.575  
Calculated sin(theta\_max)/wavelength = 0.5617

PLAT035\_ALERT\_1\_B \_chemical\_absolute\_configuration info Not given Please Do !  
PLAT049\_ALERT\_1\_B Calculated Density less than 1.0 gcm-3 ..... 0.8175 Check  
PLAT230\_ALERT\_2\_B Hirshfeld Test Diff for C14 -- C17 .. 7.2 s.u.  
PLAT242\_ALERT\_2\_B Low 'MainMol' Ueq as Compared to Neighbors of Mn3 Check

---

**Alert level C**

RFACR01\_ALERT\_3\_C The value of the weighted R factor is > 0.25  
Weighted R factor given 0.267

STRVA01\_ALERT\_4\_C Flack test results are ambiguous.  
From the CIF: \_refine\_ls\_abs\_structure\_Flack 0.358  
From the CIF: \_refine\_ls\_abs\_structure\_Flack\_su 0.007

PLAT041\_ALERT\_1\_C Calc. and Reported SumFormula Strings Differ Please Check  
PLAT043\_ALERT\_1\_C Calculated and Reported Mol. Weight Differ by .. 4.03 Check  
PLAT068\_ALERT\_1\_C Reported F000 Differs from Calcd (or Missing)... Please Check  
PLAT084\_ALERT\_3\_C High wR2 Value (i.e. > 0.25) ..... 0.27 Report  
PLAT213\_ALERT\_2\_C Atom O18 has ADP max/min Ratio .... 3.1 prolat  
PLAT220\_ALERT\_2\_C Large Non-Solvent C Ueq(max)/Ueq(min) Range 3.9 Ratio  
PLAT230\_ALERT\_2\_C Hirshfeld Test Diff for C20 -- C21 .. 6.1 s.u.  
PLAT234\_ALERT\_4\_C Large Hirshfeld Difference C2 -- C7 .. 0.16 Ang.  
PLAT234\_ALERT\_4\_C Large Hirshfeld Difference C61 -- C63 .. 0.18 Ang.  
PLAT234\_ALERT\_4\_C Large Hirshfeld Difference C61 -- C64 .. 0.23 Ang.  
PLAT241\_ALERT\_2\_C High 'MainMol' Ueq as Compared to Neighbors of 05 Check  
PLAT241\_ALERT\_2\_C High 'MainMol' Ueq as Compared to Neighbors of 013 Check  
PLAT242\_ALERT\_2\_C Low 'MainMol' Ueq as Compared to Neighbors of Mn1 Check  
PLAT242\_ALERT\_2\_C Low 'MainMol' Ueq as Compared to Neighbors of C14 Check  
PLAT242\_ALERT\_2\_C Low 'MainMol' Ueq as Compared to Neighbors of C25 Check  
PLAT242\_ALERT\_2\_C Low 'MainMol' Ueq as Compared to Neighbors of C61 Check  
PLAT341\_ALERT\_3\_C Low Bond Precision on C-C Bonds ..... 0.00818 Ang.  
PLAT369\_ALERT\_2\_C Long C(sp2)-C(sp2) Bond C10 - C19 .. 1.53 Ang.

---

**Alert level G**

FORMU01\_ALERT\_2\_G There is a discrepancy between the atom counts in the  
\_chemical\_formula\_sum and the formula from the \_atom\_site\* data.  
Atom count from \_chemical\_formula\_sum: C72 H72 Mn3 O18 P2  
Atom count from the \_atom\_site data: C72 H68 Mn3 O18 P2

CELLZ01\_ALERT\_1\_G Difference between formula and atom\_site contents detected.  
CELLZ01\_ALERT\_1\_G WARNING: H atoms missing from atom site list. Is this intentional?  
From the CIF: \_cell\_formula\_units\_Z 8  
From the CIF: \_chemical\_formula\_sum C72 H72 Mn3 O18 P2  
TEST: Compare cell contents of formula and atom\_site data

| atom | Z*formula | cif sites | diff  |
|------|-----------|-----------|-------|
| C    | 576.00    | 576.00    | 0.00  |
| H    | 576.00    | 544.00    | 32.00 |
| Mn   | 24.00     | 24.00     | 0.00  |
| O    | 144.00    | 144.00    | 0.00  |
| P    | 16.00     | 16.00     | 0.00  |

PLAT002\_ALERT\_2\_G Number of Distance or Angle Restraints on AtSite 20 Note  
PLAT004\_ALERT\_5\_G Polymeric Structure Found with Maximum Dimension 3 Info  
PLAT005\_ALERT\_5\_G No Embedded Refinement Details found in the CIF Please Do !  
PLAT033\_ALERT\_4\_G Flack x Value Deviates > 3.0 \* sigma from Zero . 0.358 Note  
PLAT066\_ALERT\_1\_G Predicted and Reported Tmin&Tmax Range Identical ? Check

|                   |                       |                             |                 |       |        |       |       |      |
|-------------------|-----------------------|-----------------------------|-----------------|-------|--------|-------|-------|------|
| PLAT072_ALERT_2_G | SHELXL                | First Parameter in WGHT     | Unusually Large | 0.19  | Report |       |       |      |
| PLAT232_ALERT_2_G | Hirshfeld             | Test Diff (M-X) Mn2         | -- O6 ..        | 7.3   | s.u.   |       |       |      |
| PLAT232_ALERT_2_G | Hirshfeld             | Test Diff (M-X) Mn2         | -- O14 ..       | 6.0   | s.u.   |       |       |      |
| PLAT232_ALERT_2_G | Hirshfeld             | Test Diff (M-X) Mn2         | -- O2_h ..      | 7.0   | s.u.   |       |       |      |
| PLAT380_ALERT_4_G | Incorrectly?          | Oriented X(sp2)-Methyl      | Moiety .....    | C18   | Check  |       |       |      |
| PLAT380_ALERT_4_G | Incorrectly?          | Oriented X(sp2)-Methyl      | Moiety .....    | C29   | Check  |       |       |      |
| PLAT380_ALERT_4_G | Incorrectly?          | Oriented X(sp2)-Methyl      | Moiety .....    | C65   | Check  |       |       |      |
| PLAT764_ALERT_4_G | Overcomplete          | CIF Bond List Detected      | (Rep/Expd) .    | 1.11  | Ratio  |       |       |      |
| PLAT779_ALERT_4_G | Suspect or Irrelevant | (Bond) Angle in CIF         | .... #          | 75    | Check  |       |       |      |
|                   | O1                    | -C1                         | -MN3            | 1.555 | 1.555  | 8.556 | 44.30 | Deg. |
| PLAT791_ALERT_4_G | The Model has         | Chirality at P1             | (Chiral SPGR)   | S     | Verify |       |       |      |
| PLAT791_ALERT_4_G | The Model has         | Chirality at P2             | (Chiral SPGR)   | R     | Verify |       |       |      |
| PLAT794_ALERT_5_G | Tentative             | Bond Valency for Mn3        | (I) .....       | 0.72  | Note   |       |       |      |
| PLAT860_ALERT_3_G | Number of             | Least-Squares Restraints    | .....           | 19    | Note   |       |       |      |
| PLAT899_ALERT_4_G | SHELXL97              | is Deprecated and Succeeded | by SHELXL       | 2014  | Note   |       |       |      |

---

1 **ALERT level A** = Most likely a serious problem - resolve or explain  
5 **ALERT level B** = A potentially serious problem, consider carefully  
20 **ALERT level C** = Check. Ensure it is not caused by an omission or oversight  
22 **ALERT level G** = General information/check it is not something unexpected

8 ALERT type 1 CIF construction/syntax error, inconsistent or missing data  
19 ALERT type 2 Indicator that the structure model may be wrong or deficient  
5 ALERT type 3 Indicator that the structure quality may be low  
13 ALERT type 4 Improvement, methodology, query or suggestion  
3 ALERT type 5 Informative message, check

---

It is advisable to attempt to resolve as many as possible of the alerts in all categories. Often the minor alerts point to easily fixed oversights, errors and omissions in your CIF or refinement strategy, so attention to these fine details can be worthwhile. In order to resolve some of the more serious problems it may be necessary to carry out additional measurements or structure refinements. However, the purpose of your study may justify the reported deviations and the more serious of these should normally be commented upon in the discussion or experimental section of a paper or in the "special\_details" fields of the CIF. checkCIF was carefully designed to identify outliers and unusual parameters, but every test has its limitations and alerts that are not important in a particular case may appear. Conversely, the absence of alerts does not guarantee there are no aspects of the results needing attention. It is up to the individual to critically assess their own results and, if necessary, seek expert advice.

### Publication of your CIF in IUCr journals

A basic structural check has been run on your CIF. These basic checks will be run on all CIFs submitted for publication in IUCr journals (*Acta Crystallographica*, *Journal of Applied Crystallography*, *Journal of Synchrotron Radiation*); however, if you intend to submit to *Acta Crystallographica Section C* or *E*, you should make sure that full publication checks are run on the final version of your CIF prior to submission.

### Publication of your CIF in other journals

Please refer to the *Notes for Authors* of the relevant journal for any special instructions relating to CIF submission.

PLATON version of 19/11/2015; check.def file version of 17/11/2015

Datablock 1-Mn - ellipsoid plot

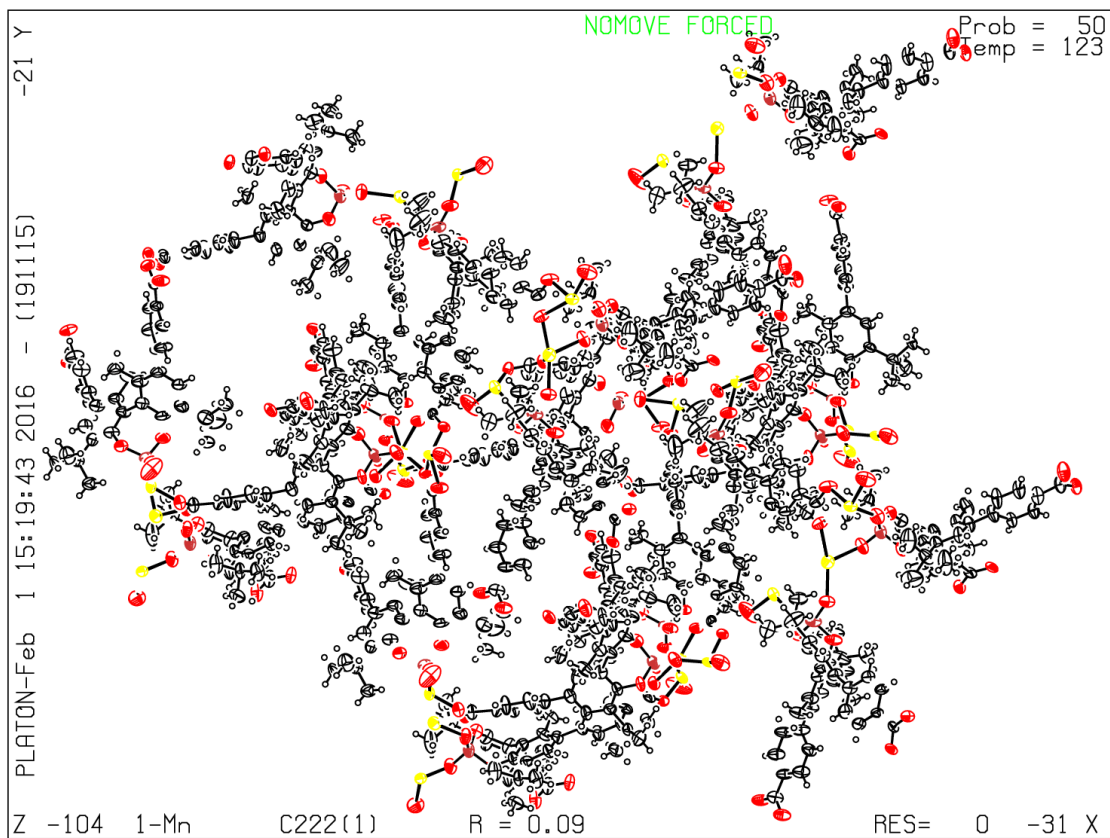

# checkCIF/PLATON report

You have not supplied any structure factors. As a result the full set of tests cannot be run.

THIS REPORT IS FOR GUIDANCE ONLY. IF USED AS PART OF A REVIEW PROCEDURE FOR PUBLICATION, IT SHOULD NOT REPLACE THE EXPERTISE OF AN EXPERIENCED CRYSTALLOGRAPHIC REFEREE.

No syntax errors found.      CIF dictionary      Interpreting this report

## Datablock: 1-Ti

---

Bond precision:    C-C = 0.0146 Å                      Wavelength=0.71073

Cell:                      a=27.341(9)              b=29.274(11)              c=29.662(10)  
                                    alpha=90              beta=90              gamma=90  
Temperature:              123 K

|                        | Calculated                                  | Reported           |
|------------------------|---------------------------------------------|--------------------|
| Volume                 | 23741(14)                                   | 23741(14)          |
| Space group            | C 2 2 21                                    | C222(1)            |
| Hall group             | C 2c 2                                      | ?                  |
| Moiety formula         | C74 H71 O19 P2 Ti3, 0.5(C4 O4), C2 O2, 3(O) | ?                  |
| Sum formula            | C78 H82 O26 P2 Ti3                          | C78 H82 O26 P2 Ti3 |
| Mr                     | 1629.90                                     | 1641.08            |
| Dx, g cm <sup>-3</sup> | 0.912                                       | 0.918              |
| Z                      | 8                                           | 8                  |
| Mu (mm <sup>-1</sup> ) | 0.276                                       | 0.276              |
| F000                   | 6744.0                                      | 6832.0             |
| F000'                  | 6755.85                                     |                    |
| h,k,lmax               | 32,34,35                                    | 32,34,35           |
| Nref                   | 20926[ 11142]                               | 20885              |
| Tmin,Tmax              | 0.978,0.984                                 | 0.978,0.984        |
| Tmin'                  | 0.978                                       |                    |

Correction method= # Reported T Limits: Tmin=0.978 Tmax=0.984  
AbsCorr = ?

Data completeness= 1.87/1.00                      Theta(max)= 25.000

R(reflections)= 0.0941( 6479)                      wR2(reflections)= 0.2130( 20885)

S = 1.020                                      Npar= 797

---

The following ALERTS were generated. Each ALERT has the format

**test-name\_ALERT\_alert-type\_alert-level.**

Click on the hyperlinks for more details of the test.

---

 **Alert level A**

PLAT602\_ALERT\_2\_A VERY LARGE Solvent Accessible VOID(S) in Structure

! Info

---

 **Alert level B**

RINTA01\_ALERT\_3\_B The value of Rint is greater than 0.18

Rint given 0.182

|                   |                                                  |        |             |
|-------------------|--------------------------------------------------|--------|-------------|
| PLAT020_ALERT_3_B | The value of Rint is greater than 0.12 .....     | 0.182  | Report      |
| PLAT026_ALERT_3_B | Ratio Observed / Unique Reflections (too) Low .. | 31     | %           |
| PLAT035_ALERT_1_B | _chemical_absolute_configuration info Not given  |        | Please Do ! |
| PLAT049_ALERT_1_B | Calculated Density less than 1.0 gcm-3 .....     | 0.9120 | Check       |
| PLAT213_ALERT_2_B | Atom O17 has ADP max/min Ratio .....             | 4.9    | oblate      |
| PLAT213_ALERT_2_B | Atom C13 has ADP max/min Ratio .....             | 4.3    | prolat      |
| PLAT213_ALERT_2_B | Atom C58 has ADP max/min Ratio .....             | 4.1    | prolat      |
| PLAT213_ALERT_2_B | Atom C67 has ADP max/min Ratio .....             | 4.6    | prolat      |
| PLAT230_ALERT_2_B | Hirshfeld Test Diff for C2 -- C7 ..              | 7.4    | s.u.        |
| PLAT230_ALERT_2_B | Hirshfeld Test Diff for C8 -- C13 ..             | 12.3   | s.u.        |
| PLAT230_ALERT_2_B | Hirshfeld Test Diff for C9 -- C18 ..             | 10.9   | s.u.        |
| PLAT230_ALERT_2_B | Hirshfeld Test Diff for C10 -- C19 ..            | 8.0    | s.u.        |
| PLAT230_ALERT_2_B | Hirshfeld Test Diff for C12 -- C14 ..            | 9.5    | s.u.        |
| PLAT230_ALERT_2_B | Hirshfeld Test Diff for C20 -- C29 ..            | 9.3    | s.u.        |
| PLAT230_ALERT_2_B | Hirshfeld Test Diff for C25 -- C28 ..            | 17.7   | s.u.        |
| PLAT230_ALERT_2_B | Hirshfeld Test Diff for C59 -- C61 ..            | 9.5    | s.u.        |
| PLAT230_ALERT_2_B | Hirshfeld Test Diff for C61 -- C62 ..            | 9.0    | s.u.        |
| PLAT230_ALERT_2_B | Hirshfeld Test Diff for C61 -- C63 ..            | 19.7   | s.u.        |
| PLAT230_ALERT_2_B | Hirshfeld Test Diff for C61 -- C64 ..            | 12.0   | s.u.        |
| PLAT232_ALERT_2_B | Hirshfeld Test Diff (M-X) Ti1 -- O5 ..           | 17.7   | s.u.        |
| PLAT232_ALERT_2_B | Hirshfeld Test Diff (M-X) Ti3 -- O7_b ..         | 15.2   | s.u.        |
| PLAT234_ALERT_4_B | Large Hirshfeld Difference C5 -- C6 ..           | 0.28   | Ang.        |
| PLAT234_ALERT_4_B | Large Hirshfeld Difference C5 -- C8 ..           | 0.30   | Ang.        |
| PLAT234_ALERT_4_B | Large Hirshfeld Difference C8 -- C9 ..           | 0.26   | Ang.        |
| PLAT234_ALERT_4_B | Large Hirshfeld Difference C14 -- C15 ..         | 0.28   | Ang.        |
| PLAT234_ALERT_4_B | Large Hirshfeld Difference C25 -- C26 ..         | 0.30   | Ang.        |
| PLAT234_ALERT_4_B | Large Hirshfeld Difference C41 -- C44 ..         | 0.26   | Ang.        |
| PLAT234_ALERT_4_B | Large Hirshfeld Difference C67 -- C68 ..         | 0.28   | Ang.        |
| PLAT241_ALERT_2_B | High 'MainMol' Ueq as Compared to Neighbors of   | 05     | Check       |
| PLAT241_ALERT_2_B | High 'MainMol' Ueq as Compared to Neighbors of   | 018    | Check       |
| PLAT241_ALERT_2_B | High 'MainMol' Ueq as Compared to Neighbors of   | C58    | Check       |
| PLAT241_ALERT_2_B | High 'MainMol' Ueq as Compared to Neighbors of   | C71    | Check       |
| PLAT242_ALERT_2_B | Low 'MainMol' Ueq as Compared to Neighbors of    | Ti1    | Check       |
| PLAT242_ALERT_2_B | Low 'MainMol' Ueq as Compared to Neighbors of    | Ti3    | Check       |
| PLAT242_ALERT_2_B | Low 'MainMol' Ueq as Compared to Neighbors of    | C5     | Check       |
| PLAT242_ALERT_2_B | Low 'MainMol' Ueq as Compared to Neighbors of    | C14    | Check       |
| PLAT242_ALERT_2_B | Low 'MainMol' Ueq as Compared to Neighbors of    | C25    | Check       |
| PLAT242_ALERT_2_B | Low 'MainMol' Ueq as Compared to Neighbors of    | C59    | Check       |
| PLAT242_ALERT_2_B | Low 'MainMol' Ueq as Compared to Neighbors of    | C61    | Check       |
| PLAT306_ALERT_2_B | Isolated Oxygen Atom (H-atoms Missing ?) .....   | 024    | Check       |
| PLAT306_ALERT_2_B | Isolated Oxygen Atom (H-atoms Missing ?) .....   | 025    | Check       |
| PLAT306_ALERT_2_B | Isolated Oxygen Atom (H-atoms Missing ?) .....   | 026    | Check       |
| PLAT412_ALERT_2_B | Short Intra XH3 .. XHn H62B .. H64C ..           | 1.72   | Ang.        |
| PLAT430_ALERT_2_B | Short Inter D...A Contact O17 .. O25 ..          | 2.78   | Ang.        |

---

 **Alert level C**

STRVA01\_ALERT\_4\_C Flack parameter is too small

From the CIF: \_refine\_ls\_abs\_structure\_Flack -0.270



From the CIF: \_refine\_ls\_abs\_structure\_Flack\_su 0.040

|                   |                                                  |                             |              |
|-------------------|--------------------------------------------------|-----------------------------|--------------|
| PLAT041_ALERT_1_C | Calc. and Reported SumFormula                    | Strings Differ              | Please Check |
| PLAT043_ALERT_1_C | Calculated and Reported Mol. Weight              | Differ by ..                | 11.18 Check  |
| PLAT052_ALERT_1_C | Info on Absorption Correction Method             | Not Given                   | Please Do !  |
| PLAT068_ALERT_1_C | Reported F000 Differs from Calcd (or Missing)... |                             | Please Check |
| PLAT202_ALERT_3_C | Isotropic non-H Atoms in Anion/Solvent .....     |                             | 11 Check     |
| PLAT213_ALERT_2_C | Atom O8                                          | has ADP max/min Ratio ..... | 3.2 oblate   |
| PLAT213_ALERT_2_C | Atom O18                                         | has ADP max/min Ratio ..... | 3.2 oblate   |
| PLAT213_ALERT_2_C | Atom C15                                         | has ADP max/min Ratio ..... | 3.2 prolat   |
| PLAT213_ALERT_2_C | Atom C27                                         | has ADP max/min Ratio ..... | 4.0 prolat   |
| PLAT213_ALERT_2_C | Atom C28                                         | has ADP max/min Ratio ..... | 3.3 prolat   |
| PLAT213_ALERT_2_C | Atom C35                                         | has ADP max/min Ratio ..... | 4.0 prolat   |
| PLAT213_ALERT_2_C | Atom C62                                         | has ADP max/min Ratio ..... | 3.2 prolat   |
| PLAT213_ALERT_2_C | Atom C63                                         | has ADP max/min Ratio ..... | 3.2 prolat   |
| PLAT213_ALERT_2_C | Atom C64                                         | has ADP max/min Ratio ..... | 3.2 prolat   |
| PLAT213_ALERT_2_C | Atom C69                                         | has ADP max/min Ratio ..... | 3.7 prolat   |
| PLAT213_ALERT_2_C | Atom C72                                         | has ADP max/min Ratio ..... | 3.2 oblate   |
| PLAT220_ALERT_2_C | Large Non-Solvent C                              | Ueq(max)/Ueq(min) Range     | 5.0 Ratio    |
| PLAT222_ALERT_3_C | Large Non-Solvent H                              | Uiso(max)/Uiso(min) ...     | 5.4 Ratio    |
| PLAT230_ALERT_2_C | Hirshfeld Test Diff for                          | P1 -- O5 ..                 | 5.4 s.u.     |
| PLAT230_ALERT_2_C | Hirshfeld Test Diff for                          | P2 -- O11 ..                | 5.7 s.u.     |
| PLAT230_ALERT_2_C | Hirshfeld Test Diff for                          | O9 -- C37 ..                | 5.5 s.u.     |
| PLAT230_ALERT_2_C | Hirshfeld Test Diff for                          | C14 -- C16 ..               | 5.3 s.u.     |
| PLAT230_ALERT_2_C | Hirshfeld Test Diff for                          | C19 -- C24 ..               | 6.1 s.u.     |
| PLAT230_ALERT_2_C | Hirshfeld Test Diff for                          | C30 -- C35 ..               | 5.1 s.u.     |
| PLAT230_ALERT_2_C | Hirshfeld Test Diff for                          | C48 -- C49 ..               | 6.7 s.u.     |
| PLAT230_ALERT_2_C | Hirshfeld Test Diff for                          | C50 -- C51 ..               | 7.0 s.u.     |
| PLAT230_ALERT_2_C | Hirshfeld Test Diff for                          | C66 -- C71 ..               | 5.4 s.u.     |
| PLAT232_ALERT_2_C | Hirshfeld Test Diff (M-X)                        | Ti1 -- O9_c ..              | 8.3 s.u.     |
| PLAT232_ALERT_2_C | Hirshfeld Test Diff (M-X)                        | Ti1 -- O16_g ..             | 8.0 s.u.     |
| PLAT232_ALERT_2_C | Hirshfeld Test Diff (M-X)                        | Ti3 -- O13 ..               | 7.0 s.u.     |
| PLAT232_ALERT_2_C | Hirshfeld Test Diff (M-X)                        | Ti3 -- O1_i ..              | 6.0 s.u.     |
| PLAT234_ALERT_4_C | Large Hirshfeld Difference                       | Ti2 -- O2_i ..              | 0.16 Ang.    |
| PLAT234_ALERT_4_C | Large Hirshfeld Difference                       | Ti3 -- O18 ..               | 0.17 Ang.    |
| PLAT234_ALERT_4_C | Large Hirshfeld Difference                       | O2 -- C1 ..                 | 0.16 Ang.    |
| PLAT234_ALERT_4_C | Large Hirshfeld Difference                       | O11 -- C47 ..               | 0.17 Ang.    |
| PLAT234_ALERT_4_C | Large Hirshfeld Difference                       | O15 -- C72 ..               | 0.24 Ang.    |
| PLAT234_ALERT_4_C | Large Hirshfeld Difference                       | C1 -- C2 ..                 | 0.24 Ang.    |
| PLAT234_ALERT_4_C | Large Hirshfeld Difference                       | C2 -- C3 ..                 | 0.21 Ang.    |
| PLAT234_ALERT_4_C | Large Hirshfeld Difference                       | C3 -- C4 ..                 | 0.20 Ang.    |
| PLAT234_ALERT_4_C | Large Hirshfeld Difference                       | C4 -- C5 ..                 | 0.21 Ang.    |
| PLAT234_ALERT_4_C | Large Hirshfeld Difference                       | C10 -- C11 ..               | 0.17 Ang.    |
| PLAT234_ALERT_4_C | Large Hirshfeld Difference                       | C20 -- C21 ..               | 0.16 Ang.    |
| PLAT234_ALERT_4_C | Large Hirshfeld Difference                       | C22 -- C23 ..               | 0.17 Ang.    |
| PLAT234_ALERT_4_C | Large Hirshfeld Difference                       | C30 -- C31 ..               | 0.17 Ang.    |
| PLAT234_ALERT_4_C | Large Hirshfeld Difference                       | C32 -- C33 ..               | 0.22 Ang.    |
| PLAT234_ALERT_4_C | Large Hirshfeld Difference                       | C41 -- C42 ..               | 0.21 Ang.    |
| PLAT234_ALERT_4_C | Large Hirshfeld Difference                       | C44 -- C45 ..               | 0.19 Ang.    |
| PLAT234_ALERT_4_C | Large Hirshfeld Difference                       | C45 -- C54 ..               | 0.21 Ang.    |
| PLAT234_ALERT_4_C | Large Hirshfeld Difference                       | C46 -- C47 ..               | 0.23 Ang.    |
| PLAT234_ALERT_4_C | Large Hirshfeld Difference                       | C48 -- C50 ..               | 0.24 Ang.    |
| PLAT234_ALERT_4_C | Large Hirshfeld Difference                       | C56 -- C57 ..               | 0.23 Ang.    |
| PLAT234_ALERT_4_C | Large Hirshfeld Difference                       | C59 -- C60 ..               | 0.21 Ang.    |
| PLAT234_ALERT_4_C | Large Hirshfeld Difference                       | C66 -- C67 ..               | 0.24 Ang.    |
| PLAT234_ALERT_4_C | Large Hirshfeld Difference                       | C69 -- C70 ..               | 0.25 Ang.    |
| PLAT234_ALERT_4_C | Large Hirshfeld Difference                       | C69 -- C72 ..               | 0.25 Ang.    |
| PLAT241_ALERT_2_C | High 'MainMol' Ueq as Compared to Neighbors of   |                             | 06 Check     |
| PLAT241_ALERT_2_C | High 'MainMol' Ueq as Compared to Neighbors of   |                             | 013 Check    |
| PLAT241_ALERT_2_C | High 'MainMol' Ueq as Compared to Neighbors of   |                             | 014 Check    |
| PLAT241_ALERT_2_C | High 'MainMol' Ueq as Compared to Neighbors of   |                             | C3 Check     |
| PLAT241_ALERT_2_C | High 'MainMol' Ueq as Compared to Neighbors of   |                             | C6 Check     |
| PLAT241_ALERT_2_C | High 'MainMol' Ueq as Compared to Neighbors of   |                             | C8 Check     |

|                   |        |                                       |                                 |         |       |
|-------------------|--------|---------------------------------------|---------------------------------|---------|-------|
| PLAT241_ALERT_2_C | High   | 'MainMol'                             | Ueq as Compared to Neighbors of | C13     | Check |
| PLAT241_ALERT_2_C | High   | 'MainMol'                             | Ueq as Compared to Neighbors of | C22     | Check |
| PLAT241_ALERT_2_C | High   | 'MainMol'                             | Ueq as Compared to Neighbors of | C32     | Check |
| PLAT241_ALERT_2_C | High   | 'MainMol'                             | Ueq as Compared to Neighbors of | C35     | Check |
| PLAT241_ALERT_2_C | High   | 'MainMol'                             | Ueq as Compared to Neighbors of | C37     | Check |
| PLAT241_ALERT_2_C | High   | 'MainMol'                             | Ueq as Compared to Neighbors of | C40     | Check |
| PLAT241_ALERT_2_C | High   | 'MainMol'                             | Ueq as Compared to Neighbors of | C43     | Check |
| PLAT241_ALERT_2_C | High   | 'MainMol'                             | Ueq as Compared to Neighbors of | C67     | Check |
| PLAT242_ALERT_2_C | Low    | 'MainMol'                             | Ueq as Compared to Neighbors of | Ti2     | Check |
| PLAT242_ALERT_2_C | Low    | 'MainMol'                             | Ueq as Compared to Neighbors of | 04      | Check |
| PLAT242_ALERT_2_C | Low    | 'MainMol'                             | Ueq as Compared to Neighbors of | C2      | Check |
| PLAT242_ALERT_2_C | Low    | 'MainMol'                             | Ueq as Compared to Neighbors of | C9      | Check |
| PLAT242_ALERT_2_C | Low    | 'MainMol'                             | Ueq as Compared to Neighbors of | C12     | Check |
| PLAT242_ALERT_2_C | Low    | 'MainMol'                             | Ueq as Compared to Neighbors of | C20     | Check |
| PLAT242_ALERT_2_C | Low    | 'MainMol'                             | Ueq as Compared to Neighbors of | C23     | Check |
| PLAT242_ALERT_2_C | Low    | 'MainMol'                             | Ueq as Compared to Neighbors of | C33     | Check |
| PLAT242_ALERT_2_C | Low    | 'MainMol'                             | Ueq as Compared to Neighbors of | C36     | Check |
| PLAT242_ALERT_2_C | Low    | 'MainMol'                             | Ueq as Compared to Neighbors of | C38     | Check |
| PLAT242_ALERT_2_C | Low    | 'MainMol'                             | Ueq as Compared to Neighbors of | C42     | Check |
| PLAT242_ALERT_2_C | Low    | 'MainMol'                             | Ueq as Compared to Neighbors of | C45     | Check |
| PLAT242_ALERT_2_C | Low    | 'MainMol'                             | Ueq as Compared to Neighbors of | C47     | Check |
| PLAT242_ALERT_2_C | Low    | 'MainMol'                             | Ueq as Compared to Neighbors of | C50     | Check |
| PLAT242_ALERT_2_C | Low    | 'MainMol'                             | Ueq as Compared to Neighbors of | C56     | Check |
| PLAT242_ALERT_2_C | Low    | 'MainMol'                             | Ueq as Compared to Neighbors of | C57     | Check |
| PLAT242_ALERT_2_C | Low    | 'MainMol'                             | Ueq as Compared to Neighbors of | C66     | Check |
| PLAT242_ALERT_2_C | Low    | 'MainMol'                             | Ueq as Compared to Neighbors of | C70     | Check |
| PLAT242_ALERT_2_C | Low    | 'MainMol'                             | Ueq as Compared to Neighbors of | C73     | Check |
| PLAT244_ALERT_4_C | Low    | 'Solvent'                             | Ueq as Compared to Neighbors of | C75     | Check |
| PLAT250_ALERT_2_C | Large  | U3/U1 Ratio for Average U(i,j) Tensor | ....                            | 2.2     | Note  |
| PLAT309_ALERT_2_C | Single | Bonded Oxygen (C-O > 1.3 Ang)         | .....                           | 020     | Check |
| PLAT341_ALERT_3_C | Low    | Bond Precision on C-C Bonds           | .....                           | 0.01457 | Ang.  |
| PLAT363_ALERT_2_C | Long   | C(sp3)-C(sp2) Bond                    | C56 - C65 ..                    | 1.63    | Ang.  |
| PLAT367_ALERT_2_C | Long?  | C(sp?)-C(sp?) Bond                    | C75 - C76 ..                    | 1.58    | Ang.  |
| PLAT367_ALERT_2_C | Long?  | C(sp?)-C(sp?) Bond                    | C76 - C76_j ..                  | 1.65    | Ang.  |
| PLAT369_ALERT_2_C | Long   | C(sp2)-C(sp2) Bond                    | C10 - C19 ..                    | 1.55    | Ang.  |
| PLAT369_ALERT_2_C | Long   | C(sp2)-C(sp2) Bond                    | C46 - C55 ..                    | 1.53    | Ang.  |

### Alert level G

FORMU01\_ALERT\_2\_G There is a discrepancy between the atom counts in the  
 \_chemical\_formula\_sum and the formula from the \_atom\_site\* data.  
 Atom count from \_chemical\_formula\_sum: C78 H82 O26 P2 Ti3  
 Atom count from the \_atom\_site data: C78 H71 O26 P2 Ti3

CELLZ01\_ALERT\_1\_G Difference between formula and atom\_site contents detected.

CELLZ01\_ALERT\_1\_G WARNING: H atoms missing from atom site list. Is this intentional?  
 From the CIF: \_cell\_formula\_units\_Z 8  
 From the CIF: \_chemical\_formula\_sum C78 H82 O26 P2 Ti3  
 TEST: Compare cell contents of formula and atom\_site data

| atom | Z*formula | cif sites | diff  |
|------|-----------|-----------|-------|
| C    | 624.00    | 624.00    | 0.00  |
| H    | 656.00    | 568.00    | 88.00 |
| O    | 208.00    | 208.00    | 0.00  |
| P    | 16.00     | 16.00     | 0.00  |
| Ti   | 24.00     | 24.00     | 0.00  |

PLAT002\_ALERT\_2\_G Number of Distance or Angle Restraints on AtSite 32 Note

PLAT003\_ALERT\_2\_G Number of Uiso or Uij Restrained non-H Atoms ... 2 Report

PLAT004\_ALERT\_5\_G Polymeric Structure Found with Maximum Dimension 3 Info

PLAT005\_ALERT\_5\_G No Embedded Refinement Details found in the CIF Please Do !

PLAT033\_ALERT\_4\_G Flack x Value Deviates > 3.0 \* sigma from Zero . -0.270 Note

PLAT066\_ALERT\_1\_G Predicted and Reported Tmin&Tmax Range Identical ? Check

|                   |                                                     |                                  |       |        |
|-------------------|-----------------------------------------------------|----------------------------------|-------|--------|
| PLAT343_ALERT_2_G | Unusual sp3                                         | Angle Range in Main Residue for  | C61   | Check  |
| PLAT344_ALERT_2_G | Unusual sp?                                         | Angle Range in Solvent/Ion for . | C76   | Check  |
| PLAT344_ALERT_2_G | Unusual sp?                                         | Angle Range in Solvent/Ion for . | C78   | Check  |
| PLAT380_ALERT_4_G | Incorrectly? Oriented X(sp2)-Methyl Moiety . . . .  |                                  | C29   | Check  |
| PLAT380_ALERT_4_G | Incorrectly? Oriented X(sp2)-Methyl Moiety . . . .  |                                  | C54   | Check  |
| PLAT380_ALERT_4_G | Incorrectly? Oriented X(sp2)-Methyl Moiety . . . .  |                                  | C74   | Check  |
| PLAT764_ALERT_4_G | Overcomplete CIF Bond List Detected (Rep/Expd) .    |                                  | 1.11  | Ratio  |
| PLAT779_ALERT_4_G | Suspect or Irrelevant (Bond) Angle in CIF . . . . # |                                  | 75    | Check  |
|                   | 01 -C1 -TI3                                         | 1.555 1.555 8.645                | 42.30 | Deg.   |
| PLAT791_ALERT_4_G | The Model has Chirality at P1                       | (Chiral SPGR)                    | S     | Verify |
| PLAT791_ALERT_4_G | The Model has Chirality at P2                       | (Chiral SPGR)                    | R     | Verify |
| PLAT860_ALERT_3_G | Number of Least-Squares Restraints . . . . .        |                                  | 46    | Note   |
| PLAT899_ALERT_4_G | SHELXL97 is Deprecated and Succeeded by SHELXL      |                                  | 2014  | Note   |

---

1 **ALERT level A** = Most likely a serious problem - resolve or explain  
45 **ALERT level B** = A potentially serious problem, consider carefully  
98 **ALERT level C** = Check. Ensure it is not caused by an omission or oversight  
21 **ALERT level G** = General information/check it is not something unexpected

9 ALERT type 1 CIF construction/syntax error, inconsistent or missing data  
105 ALERT type 2 Indicator that the structure model may be wrong or deficient  
7 ALERT type 3 Indicator that the structure quality may be low  
42 ALERT type 4 Improvement, methodology, query or suggestion  
2 ALERT type 5 Informative message, check

---

It is advisable to attempt to resolve as many as possible of the alerts in all categories. Often the minor alerts point to easily fixed oversights, errors and omissions in your CIF or refinement strategy, so attention to these fine details can be worthwhile. In order to resolve some of the more serious problems it may be necessary to carry out additional measurements or structure refinements. However, the purpose of your study may justify the reported deviations and the more serious of these should normally be commented upon in the discussion or experimental section of a paper or in the "special\_details" fields of the CIF. checkCIF was carefully designed to identify outliers and unusual parameters, but every test has its limitations and alerts that are not important in a particular case may appear. Conversely, the absence of alerts does not guarantee there are no aspects of the results needing attention. It is up to the individual to critically assess their own results and, if necessary, seek expert advice.

### Publication of your CIF in IUCr journals

A basic structural check has been run on your CIF. These basic checks will be run on all CIFs submitted for publication in IUCr journals (*Acta Crystallographica*, *Journal of Applied Crystallography*, *Journal of Synchrotron Radiation*); however, if you intend to submit to *Acta Crystallographica Section C* or *E*, you should make sure that full publication checks are run on the final version of your CIF prior to submission.

### Publication of your CIF in other journals

Please refer to the *Notes for Authors* of the relevant journal for any special instructions relating to CIF submission.

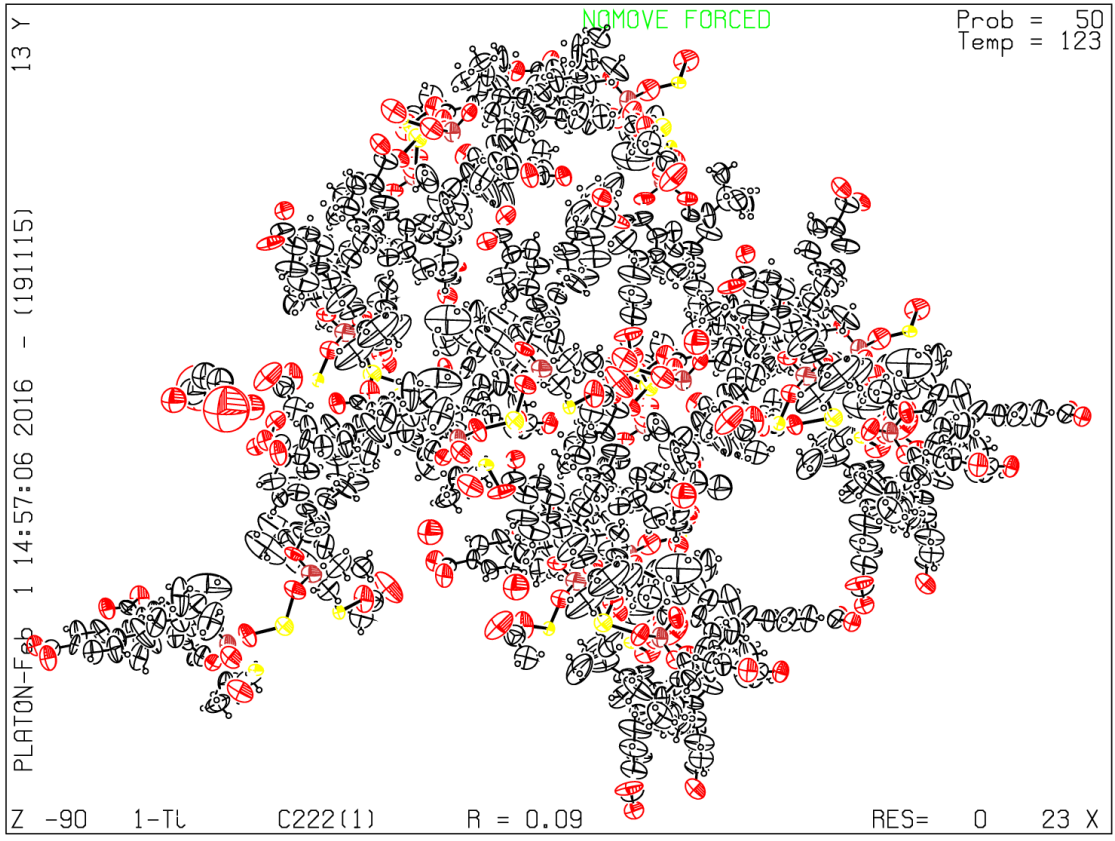



The following ALERTS were generated. Each ALERT has the format

**test-name\_ALERT\_alert-type\_alert-level.**

Click on the hyperlinks for more details of the test.

---

### Alert level A

THETM01\_ALERT\_3\_A The value of  $\sin(\theta_{\max})/\lambda$  is less than 0.550  
Calculated  $\sin(\theta_{\max})/\lambda = 0.5313$   
PLAT602\_ALERT\_2\_A VERY LARGE Solvent Accessible VOID(S) in Structure ! Info

---

### Alert level B

PLAT035\_ALERT\_1\_B \_chemical\_absolute\_configuration info Not given Please Do !  
PLAT213\_ALERT\_2\_B Atom C61 has ADP max/min Ratio ..... 5.0 prolat  
PLAT220\_ALERT\_2\_B Large Non-Solvent C Ueq(max)/Ueq(min) Range 7.1 Ratio  
PLAT222\_ALERT\_3\_B Large Non-Solvent H Uiso(max)/Uiso(min) ... 7.6 Ratio  
PLAT230\_ALERT\_2\_B Hirshfeld Test Diff for O8 -- C36 .. 7.2 s.u.  
PLAT230\_ALERT\_2\_B Hirshfeld Test Diff for O9 -- C37 .. 7.2 s.u.  
PLAT230\_ALERT\_2\_B Hirshfeld Test Diff for O10 -- C37 .. 8.0 s.u.  
PLAT241\_ALERT\_2\_B High 'MainMol' Ueq as Compared to Neighbors of Zr2 Check  
PLAT306\_ALERT\_2\_B Isolated Oxygen Atom (H-atoms Missing ?) ..... 024 Check  
PLAT306\_ALERT\_2\_B Isolated Oxygen Atom (H-atoms Missing ?) ..... 025 Check  
PLAT306\_ALERT\_2\_B Isolated Oxygen Atom (H-atoms Missing ?) ..... 026 Check

---

### Alert level C

RFACR01\_ALERT\_3\_C The value of the weighted R factor is > 0.25  
Weighted R factor given 0.253  
PLAT029\_ALERT\_3\_C \_diffrn\_measured\_fraction\_theta\_full Low ..... 0.970 Note  
PLAT041\_ALERT\_1\_C Calc. and Reported SumFormula Strings Differ Please Check  
PLAT043\_ALERT\_1\_C Calculated and Reported Mol. Weight Differ by .. 11.09 Check  
PLAT068\_ALERT\_1\_C Reported F000 Differs from Calcd (or Missing)... Please Check  
PLAT202\_ALERT\_3\_C Isotropic non-H Atoms in Anion/Solvent ..... 11 Check  
PLAT213\_ALERT\_2\_C Atom O10 has ADP max/min Ratio ..... 3.3 oblate  
PLAT213\_ALERT\_2\_C Atom O15 has ADP max/min Ratio ..... 3.1 prolat  
PLAT213\_ALERT\_2\_C Atom O17 has ADP max/min Ratio ..... 3.3 prolat  
PLAT213\_ALERT\_2\_C Atom O18 has ADP max/min Ratio ..... 3.7 prolat  
PLAT213\_ALERT\_2\_C Atom O19 has ADP max/min Ratio ..... 3.2 oblate  
PLAT213\_ALERT\_2\_C Atom C7 has ADP max/min Ratio ..... 3.4 prolat  
PLAT213\_ALERT\_2\_C Atom C14 has ADP max/min Ratio ..... 3.1 prolat  
PLAT213\_ALERT\_2\_C Atom C59 has ADP max/min Ratio ..... 4.0 prolat  
PLAT213\_ALERT\_2\_C Atom C64 has ADP max/min Ratio ..... 3.5 prolat  
PLAT213\_ALERT\_2\_C Atom C66 has ADP max/min Ratio ..... 3.7 prolat  
PLAT213\_ALERT\_2\_C Atom C67 has ADP max/min Ratio ..... 3.1 prolat  
PLAT213\_ALERT\_2\_C Atom C72 has ADP max/min Ratio ..... 3.2 prolat  
PLAT230\_ALERT\_2\_C Hirshfeld Test Diff for O2 -- C1 .. 7.0 s.u.  
PLAT230\_ALERT\_2\_C Hirshfeld Test Diff for O7 -- C36 .. 5.2 s.u.  
PLAT230\_ALERT\_2\_C Hirshfeld Test Diff for C14 -- C16 .. 6.9 s.u.  
PLAT230\_ALERT\_2\_C Hirshfeld Test Diff for C46 -- C47 .. 5.2 s.u.  
PLAT230\_ALERT\_2\_C Hirshfeld Test Diff for C61 -- C63 .. 6.5 s.u.  
PLAT234\_ALERT\_4\_C Large Hirshfeld Difference C6 -- C7 .. 0.17 Ang.  
PLAT234\_ALERT\_4\_C Large Hirshfeld Difference C12 -- C13 .. 0.18 Ang.  
PLAT234\_ALERT\_4\_C Large Hirshfeld Difference C20 -- C21 .. 0.16 Ang.  
PLAT234\_ALERT\_4\_C Large Hirshfeld Difference C25 -- C26 .. 0.19 Ang.  
PLAT234\_ALERT\_4\_C Large Hirshfeld Difference C33 -- C34 .. 0.16 Ang.  
PLAT234\_ALERT\_4\_C Large Hirshfeld Difference C55 -- C60 .. 0.16 Ang.  
PLAT234\_ALERT\_4\_C Large Hirshfeld Difference C66 -- C67 .. 0.19 Ang.  
PLAT241\_ALERT\_2\_C High 'MainMol' Ueq as Compared to Neighbors of C13 Check  
PLAT241\_ALERT\_2\_C High 'MainMol' Ueq as Compared to Neighbors of C61 Check  
PLAT241\_ALERT\_2\_C High 'MainMol' Ueq as Compared to Neighbors of C73 Check  
PLAT242\_ALERT\_2\_C Low 'MainMol' Ueq as Compared to Neighbors of O6 Check

|                   |                                                  |                              |                                 |         |        |
|-------------------|--------------------------------------------------|------------------------------|---------------------------------|---------|--------|
| PLAT242_ALERT_2_C | Low                                              | 'MainMol'                    | Ueq as Compared to Neighbors of | 014     | Check  |
| PLAT242_ALERT_2_C | Low                                              | 'MainMol'                    | Ueq as Compared to Neighbors of | 018     | Check  |
| PLAT242_ALERT_2_C | Low                                              | 'MainMol'                    | Ueq as Compared to Neighbors of | C25     | Check  |
| PLAT242_ALERT_2_C | Low                                              | 'MainMol'                    | Ueq as Compared to Neighbors of | C59     | Check  |
| PLAT243_ALERT_4_C | High                                             | 'Solvent'                    | Ueq as Compared to Neighbors of | C77     | Check  |
| PLAT244_ALERT_4_C | Low                                              | 'Solvent'                    | Ueq as Compared to Neighbors of | C75     | Check  |
| PLAT250_ALERT_2_C | Large U3/U1 Ratio for Average U(i,j) Tensor .... |                              |                                 | 2.1     | Note   |
| PLAT342_ALERT_3_C | Low Bond Precision on C-C Bonds .....            |                              |                                 | 0.00878 | Ang.   |
| PLAT369_ALERT_2_C | Long                                             | C(sp2)-C(sp2) Bond           | C10 - C19 ..                    | 1.55    | Ang.   |
| PLAT369_ALERT_2_C | Long                                             | C(sp2)-C(sp2) Bond           | C33 - C36 ..                    | 1.54    | Ang.   |
| PLAT369_ALERT_2_C | Long                                             | C(sp2)-C(sp2) Bond           | C41 - C44 ..                    | 1.53    | Ang.   |
| PLAT395_ALERT_2_C | Deviating                                        | X-O-Y Angle from 120 Deg for | O23                             | 156.8   | Degree |

### Alert level G

FORMU01\_ALERT\_2\_G There is a discrepancy between the atom counts in the  
 \_chemical\_formula\_sum and the formula from the \_atom\_site\* data.  
 Atom count from \_chemical\_formula\_sum: C78 H82 O26 P2 Zr3  
 Atom count from the \_atom\_site data: C78 H71 O26 P2 Zr3

CELLZ01\_ALERT\_1\_G Difference between formula and atom\_site contents detected.  
 CELLZ01\_ALERT\_1\_G WARNING: H atoms missing from atom site list. Is this intentional?  
 From the CIF: \_cell\_formula\_units\_Z 8  
 From the CIF: \_chemical\_formula\_sum C78 H82 O26 P2 Zr3  
 TEST: Compare cell contents of formula and atom\_site data

| atom | Z*formula | cif sites | diff  |
|------|-----------|-----------|-------|
| C    | 624.00    | 624.00    | 0.00  |
| H    | 656.00    | 568.00    | 88.00 |
| O    | 208.00    | 208.00    | 0.00  |
| P    | 16.00     | 16.00     | 0.00  |
| Zr   | 24.00     | 24.00     | 0.00  |

PLAT002\_ALERT\_2\_G Number of Distance or Angle Restraints on AtSite 32 Note  
 PLAT003\_ALERT\_2\_G Number of Uiso or Uij Restrained non-H Atoms ... 7 Report  
 PLAT004\_ALERT\_5\_G Polymeric Structure Found with Maximum Dimension 3 Info  
 PLAT005\_ALERT\_5\_G No Embedded Refinement Details found in the CIF Please Do !  
 PLAT033\_ALERT\_4\_G Flack x Value Deviates > 3.0 \* sigma from Zero . 0.138 Note  
 PLAT066\_ALERT\_1\_G Predicted and Reported Tmin&Tmax Range Identical ? Check  
 PLAT072\_ALERT\_2\_G SHELXL First Parameter in WGHT Unusually Large 0.20 Report  
 PLAT232\_ALERT\_2\_G Hirshfeld Test Diff (M-X) Zr1 -- O5 .. 11.7 s.u.  
 PLAT232\_ALERT\_2\_G Hirshfeld Test Diff (M-X) Zr1 -- O17 .. 6.3 s.u.  
 PLAT232\_ALERT\_2\_G Hirshfeld Test Diff (M-X) Zr1 -- O9\_c .. 14.0 s.u.  
 PLAT232\_ALERT\_2\_G Hirshfeld Test Diff (M-X) Zr1 -- O15\_g .. 6.0 s.u.  
 PLAT232\_ALERT\_2\_G Hirshfeld Test Diff (M-X) Zr2 -- O6 .. 36.0 s.u.  
 PLAT232\_ALERT\_2\_G Hirshfeld Test Diff (M-X) Zr2 -- O14 .. 41.0 s.u.  
 PLAT232\_ALERT\_2\_G Hirshfeld Test Diff (M-X) Zr2 -- O8\_b .. 33.5 s.u.  
 PLAT232\_ALERT\_2\_G Hirshfeld Test Diff (M-X) Zr2 -- O10\_c .. 34.0 s.u.  
 PLAT232\_ALERT\_2\_G Hirshfeld Test Diff (M-X) Zr2 -- O16\_g .. 24.7 s.u.  
 PLAT232\_ALERT\_2\_G Hirshfeld Test Diff (M-X) Zr2 -- O2\_i .. 24.3 s.u.  
 PLAT232\_ALERT\_2\_G Hirshfeld Test Diff (M-X) Zr3 -- O13 .. 7.3 s.u.  
 PLAT232\_ALERT\_2\_G Hirshfeld Test Diff (M-X) Zr3 -- O7\_b .. 9.3 s.u.  
 PLAT232\_ALERT\_2\_G Hirshfeld Test Diff (M-X) Zr3 -- O1\_i .. 8.0 s.u.  
 PLAT344\_ALERT\_2\_G Unusual sp? Angle Range in Solvent/Ion for . C78 Check  
 PLAT344\_ALERT\_2\_G Unusual sp? Angle Range in Solvent/Ion for . C76 Check  
 PLAT380\_ALERT\_4\_G Incorrectly? Oriented X(sp2)-Methyl Moiety ..... C18 Check  
 PLAT380\_ALERT\_4\_G Incorrectly? Oriented X(sp2)-Methyl Moiety ..... C29 Check  
 PLAT380\_ALERT\_4\_G Incorrectly? Oriented X(sp2)-Methyl Moiety ..... C54 Check  
 PLAT380\_ALERT\_4\_G Incorrectly? Oriented X(sp2)-Methyl Moiety ..... C65 Check  
 PLAT764\_ALERT\_4\_G Overcomplete CIF Bond List Detected (Rep/Expd) . 1.15 Ratio  
 PLAT779\_ALERT\_4\_G Suspect or Irrelevant (Bond) Angle in CIF .... # 94 Check  
 O1 -C1 -ZR3 1.555 1.555 8.645 44.20 Deg.  
 PLAT779\_ALERT\_4\_G Suspect or Irrelevant (Bond) Angle in CIF .... # 164 Check

|                   |                                                  |      |       |       |       |       |        |
|-------------------|--------------------------------------------------|------|-------|-------|-------|-------|--------|
| 07                | -C36                                             | -ZR3 | 1.555 | 1.555 | 3.555 | 37.10 | Deg.   |
| PLAT779_ALERT_4_G | Suspect or Irrelevant (Bond) Angle in CIF .... # |      |       |       |       | 170   | Check  |
| 09                | -C37                                             | -ZR1 | 1.555 | 1.555 | 4.655 | 37.50 | Deg.   |
| PLAT791_ALERT_4_G | The Model has Chirality at P1 (Chiral SPGR)      |      |       |       |       | S     | Verify |
| PLAT791_ALERT_4_G | The Model has Chirality at P2 (Chiral SPGR)      |      |       |       |       | R     | Verify |
| PLAT791_ALERT_4_G | The Model has Chirality at C72 (Chiral SPGR)     |      |       |       |       | R     | Verify |
| PLAT794_ALERT_5_G | Tentative Bond Valency for Zr1 (IV) .....        |      |       |       |       | 4.08  | Note   |
| PLAT794_ALERT_5_G | Tentative Bond Valency for Zr2 (IV) .....        |      |       |       |       | 2.11  | Note   |
| PLAT794_ALERT_5_G | Tentative Bond Valency for Zr3 (IV) .....        |      |       |       |       | 3.92  | Note   |
| PLAT860_ALERT_3_G | Number of Least-Squares Restraints .....         |      |       |       |       | 79    | Note   |
| PLAT899_ALERT_4_G | SHELXL97 is Deprecated and Succeeded by SHELXL   |      |       |       |       | 2014  | Note   |

---

2 **ALERT level A** = Most likely a serious problem - resolve or explain  
11 **ALERT level B** = A potentially serious problem, consider carefully  
46 **ALERT level C** = Check. Ensure it is not caused by an omission or oversight  
41 **ALERT level G** = General information/check it is not something unexpected

7 **ALERT type 1** CIF construction/syntax error, inconsistent or missing data  
59 **ALERT type 2** Indicator that the structure model may be wrong or deficient  
7 **ALERT type 3** Indicator that the structure quality may be low  
22 **ALERT type 4** Improvement, methodology, query or suggestion  
5 **ALERT type 5** Informative message, check

---

It is advisable to attempt to resolve as many as possible of the alerts in all categories. Often the minor alerts point to easily fixed oversights, errors and omissions in your CIF or refinement strategy, so attention to these fine details can be worthwhile. In order to resolve some of the more serious problems it may be necessary to carry out additional measurements or structure refinements. However, the purpose of your study may justify the reported deviations and the more serious of these should normally be commented upon in the discussion or experimental section of a paper or in the "special\_details" fields of the CIF. checkCIF was carefully designed to identify outliers and unusual parameters, but every test has its limitations and alerts that are not important in a particular case may appear. Conversely, the absence of alerts does not guarantee there are no aspects of the results needing attention. It is up to the individual to critically assess their own results and, if necessary, seek expert advice.

### Publication of your CIF in IUCr journals

A basic structural check has been run on your CIF. These basic checks will be run on all CIFs submitted for publication in IUCr journals (*Acta Crystallographica*, *Journal of Applied Crystallography*, *Journal of Synchrotron Radiation*); however, if you intend to submit to *Acta Crystallographica Section C* or *E*, you should make sure that full publication checks are run on the final version of your CIF prior to submission.

### Publication of your CIF in other journals

Please refer to the *Notes for Authors* of the relevant journal for any special instructions relating to CIF submission.

---

**PLATON version of 19/11/2015; check.def file version of 17/11/2015**



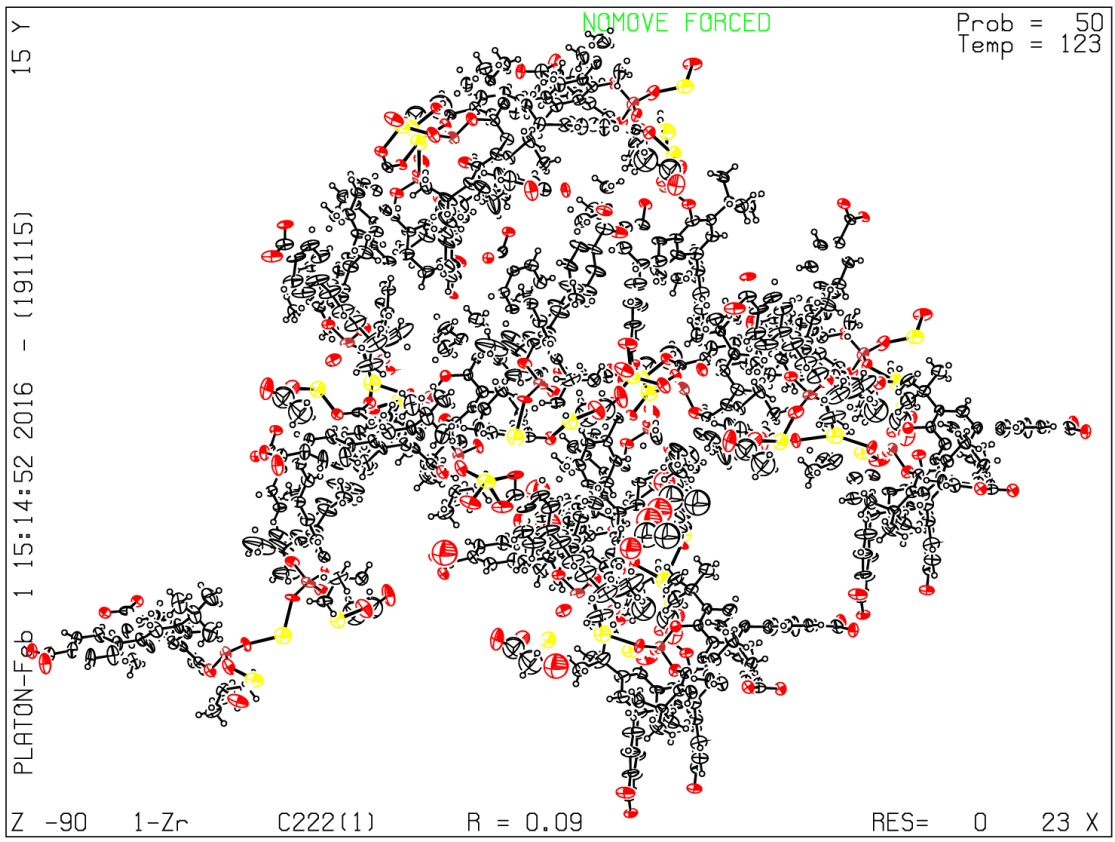

# checkCIF/PLATON report

Structure factors have been supplied for datablock(s) me2l-mg

THIS REPORT IS FOR GUIDANCE ONLY. IF USED AS PART OF A REVIEW PROCEDURE FOR PUBLICATION, IT SHOULD NOT REPLACE THE EXPERTISE OF AN EXPERIENCED CRYSTALLOGRAPHIC REFEREE.

No syntax errors found.      CIF dictionary      Interpreting this report

## Datablock: me2l-mg

---

|                 |                               |                               |             |
|-----------------|-------------------------------|-------------------------------|-------------|
| Bond precision: | C-C = 0.0158 A                | Wavelength=1.54178            |             |
| Cell:           | a=21.9287(12)                 | b=34.0887(18)                 | c=37.283(2) |
|                 | alpha=90                      | beta=90                       | gamma=90    |
| Temperature:    | 173 K                         |                               |             |
|                 | Calculated                    | Reported                      |             |
| Volume          | 27870(3)                      | 27870(3)                      |             |
| Space group     | P 21 21 21                    | P 21 21 21                    |             |
| Hall group      | P 2ac 2ab                     | P 2ac 2ab                     |             |
| Moiety formula  | C228 H240 Mg3 O56 P6, 3(C4 O) | C228 H240 Mg3 O56 P6, 3(C4 O) |             |
| Sum formula     | C240 H240 Mg3 O59 P6          | C240 H240 Mg3 O59 P6          |             |
| Mr              | 4327.08                       | 4327.06                       |             |
| Dx,g cm-3       | 1.031                         | 1.031                         |             |
| Z               | 4                             | 4                             |             |
| Mu (mm-1)       | 0.973                         | 0.973                         |             |
| F000            | 9112.0                        | 9112.0                        |             |
| F000'           | 9149.05                       |                               |             |
| h,k,lmax        | 24,37,41                      | 24,37,41                      |             |
| Nref            | 40418[ 21567]                 | 39778                         |             |
| Tmin,Tmax       | 0.586,0.678                   |                               |             |
| Tmin'           | 0.437                         |                               |             |

Correction method= Not given

Data completeness= 1.84/0.98      Theta(max)= 59.218

R(reflections)= 0.1313( 28098)      wR2(reflections)= 0.3439( 39778)

S = 1.244      Npar= 2500

---

The following ALERTS were generated. Each ALERT has the format

**test-name\_ALERT\_alert-type\_alert-level.**

Click on the hyperlinks for more details of the test.

---

**Alert level A**PLAT602\_ALERT\_2\_A VERY LARGE Solvent Accessible VOID(S) in Structure ! Info

---

**Alert level B**

THETM01\_ALERT\_3\_B The value of  $\sin(\theta_{\max})/\text{wavelength}$  is less than 0.575  
Calculated  $\sin(\theta_{\max})/\text{wavelength} = 0.5572$

PLAT035\_ALERT\_1\_B \_chemical\_absolute\_configuration info Not given Please Do !  
PLAT340\_ALERT\_3\_B Low Bond Precision on C-C Bonds ..... 0.01578 Ang.  
PLAT430\_ALERT\_2\_B Short Inter D...A Contact O37 .. O47 .. 2.73 Ang.  
PLAT987\_ALERT\_1\_B The Flack x is >> 0 - Do a BASF/TWIN Refinement Please Check

---

**Alert level C**

DIFMX02\_ALERT\_1\_C The maximum difference density is > 0.1\*ZMAX\*0.75  
The relevant atom site should be identified.

PLAT018\_ALERT\_1\_C \_difrn\_measured\_fraction\_theta\_max .NE. \*\_full ! Check  
PLAT057\_ALERT\_3\_C Correction for Absorption Required RT(exp) ... 1.16 Do !  
PLAT082\_ALERT\_2\_C High R1 Value ..... 0.13 Report  
PLAT084\_ALERT\_3\_C High wR2 Value (i.e. > 0.25) ..... 0.34 Report  
PLAT094\_ALERT\_2\_C Ratio of Maximum / Minimum Residual Density ... 2.70 Report  
PLAT097\_ALERT\_2\_C Large Reported Max. (Positive) Residual Density 1.49 eA-3  
PLAT202\_ALERT\_3\_C Isotropic non-H Atoms in Anion/Solvent ..... 15 Check  
PLAT220\_ALERT\_2\_C Non-Solvent Resd 1 C Ueq(max)/Ueq(min) Range 4.0 Ratio  
PLAT220\_ALERT\_2\_C Non-Solvent Resd 1 O Ueq(max)/Ueq(min) Range 4.0 Ratio  
PLAT222\_ALERT\_3\_C Non-Solvent Resd 1 H Uiso(max)/Uiso(min) Range 4.6 Ratio  
PLAT241\_ALERT\_2\_C High 'MainMol' Ueq as Compared to Neighbors of 059 Check  
PLAT241\_ALERT\_2\_C High 'MainMol' Ueq as Compared to Neighbors of C183 Check  
PLAT241\_ALERT\_2\_C High 'MainMol' Ueq as Compared to Neighbors of C186 Check  
PLAT241\_ALERT\_2\_C High 'MainMol' Ueq as Compared to Neighbors of C187 Check  
PLAT241\_ALERT\_2\_C High 'MainMol' Ueq as Compared to Neighbors of C195 Check  
PLAT242\_ALERT\_2\_C Low 'MainMol' Ueq as Compared to Neighbors of 040 Check  
PLAT242\_ALERT\_2\_C Low 'MainMol' Ueq as Compared to Neighbors of C17 Check  
PLAT242\_ALERT\_2\_C Low 'MainMol' Ueq as Compared to Neighbors of C43 Check  
PLAT242\_ALERT\_2\_C Low 'MainMol' Ueq as Compared to Neighbors of C64 Check  
PLAT242\_ALERT\_2\_C Low 'MainMol' Ueq as Compared to Neighbors of C124 Check  
PLAT242\_ALERT\_2\_C Low 'MainMol' Ueq as Compared to Neighbors of C132 Check  
PLAT242\_ALERT\_2\_C Low 'MainMol' Ueq as Compared to Neighbors of C145 Check  
PLAT242\_ALERT\_2\_C Low 'MainMol' Ueq as Compared to Neighbors of C182 Check  
PLAT242\_ALERT\_2\_C Low 'MainMol' Ueq as Compared to Neighbors of C184 Check  
PLAT242\_ALERT\_2\_C Low 'MainMol' Ueq as Compared to Neighbors of C201 Check  
PLAT242\_ALERT\_2\_C Low 'MainMol' Ueq as Compared to Neighbors of C230 Check  
PLAT242\_ALERT\_2\_C Low 'MainMol' Ueq as Compared to Neighbors of C231 Check  
PLAT242\_ALERT\_2\_C Low 'MainMol' Ueq as Compared to Neighbors of C233 Check  
PLAT243\_ALERT\_4\_C High 'Solvent' Ueq as Compared to Neighbors of C209 Check  
PLAT243\_ALERT\_4\_C High 'Solvent' Ueq as Compared to Neighbors of 052 Check  
PLAT244\_ALERT\_4\_C Low 'Solvent' Ueq as Compared to Neighbors of 048 Check  
PLAT244\_ALERT\_4\_C Low 'Solvent' Ueq as Compared to Neighbors of C218 Check  
PLAT244\_ALERT\_4\_C Low 'Solvent' Ueq as Compared to Neighbors of C227 Check  
PLAT244\_ALERT\_4\_C Low 'Solvent' Ueq as Compared to Neighbors of C214 Check  
PLAT430\_ALERT\_2\_C Short Inter D...A Contact O17 .. O39 .. 2.88 Ang.  
PLAT906\_ALERT\_3\_C Large K value in the Analysis of Variance ..... 2.640 Check  
PLAT911\_ALERT\_3\_C Missing # FCF Refl Between THmin & STh/L= 0.557 256 Report  
PLAT918\_ALERT\_3\_C Reflection(s) with I(obs) much Smaller I(calc) . 20 Check  
PLAT934\_ALERT\_3\_C Number of (Iobs-Icalc)/SigmaW > 10 Outliers .... 1 Check  
PLAT939\_ALERT\_3\_C Large Value of Not (SHELXL) Weight Optimized S . 34.67 Check  
PLAT978\_ALERT\_2\_C Number C-C Bonds with Positive Residual Density. 0 Info

---

**Alert level G**

PLAT002\_ALERT\_2\_G Number of Distance or Angle Restraints on AtSite 42 Note

|                   |                                                  |       |        |
|-------------------|--------------------------------------------------|-------|--------|
| PLAT003_ALERT_2_G | Number of Uiso or Uij Restrained non-H Atoms ... | 308   | Report |
| PLAT033_ALERT_4_G | Flack x Value Deviates > 3.0 * sigma from Zero . | 0.104 | Note   |
| PLAT063_ALERT_4_G | Crystal Size Likely too Large for Beam Size .... | 0.80  | mm     |
| PLAT072_ALERT_2_G | SHELXL First Parameter in WGHT Unusually Large   | 0.20  | Report |
| PLAT172_ALERT_4_G | The CIF-Embedded .res File Contains DFIX Records | 19    | Report |
| PLAT174_ALERT_4_G | The CIF-Embedded .res File Contains FLAT Records | 4     | Report |
| PLAT177_ALERT_4_G | The CIF-Embedded .res File Contains DELU Records | 1     | Report |
| PLAT178_ALERT_4_G | The CIF-Embedded .res File Contains SIMU Records | 1     | Report |
| PLAT344_ALERT_2_G | Unusual sp? Angle Range in Solvent/Ion for .     | C209  | Check  |
| PLAT344_ALERT_2_G | Unusual sp? Angle Range in Solvent/Ion for .     | C216  | Check  |
| PLAT344_ALERT_2_G | Unusual sp? Angle Range in Solvent/Ion for .     | C220  | Check  |
| PLAT344_ALERT_2_G | Unusual sp? Angle Range in Solvent/Ion for .     | C221  | Check  |
| PLAT344_ALERT_2_G | Unusual sp? Angle Range in Solvent/Ion for .     | C218  | Check  |
| PLAT344_ALERT_2_G | Unusual sp? Angle Range in Solvent/Ion for .     | C227  | Check  |
| PLAT344_ALERT_2_G | Unusual sp? Angle Range in Solvent/Ion for .     | C242  | Check  |
| PLAT344_ALERT_2_G | Unusual sp? Angle Range in Solvent/Ion for .     | C243  | Check  |
| PLAT344_ALERT_2_G | Unusual sp? Angle Range in Solvent/Ion for .     | C180  | Check  |
| PLAT344_ALERT_2_G | Unusual sp? Angle Range in Solvent/Ion for .     | C214  | Check  |
| PLAT344_ALERT_2_G | Unusual sp? Angle Range in Solvent/Ion for .     | C222  | Check  |
| PLAT344_ALERT_2_G | Unusual sp? Angle Range in Solvent/Ion for .     | C241  | Check  |
| PLAT367_ALERT_2_G | Long? C(sp?)-C(sp?) Bond C209 - C221 ..          | 1.53  | Ang.   |
| PLAT367_ALERT_2_G | Long? C(sp?)-C(sp?) Bond C227 - C243 ..          | 1.65  | Ang.   |
| PLAT367_ALERT_2_G | Long? C(sp?)-C(sp?) Bond C180 - C241 ..          | 1.53  | Ang.   |
| PLAT367_ALERT_2_G | Long? C(sp?)-C(sp?) Bond C214 - C222 ..          | 1.54  | Ang.   |
| PLAT380_ALERT_4_G | Incorrectly? Oriented X(sp2)-Methyl Moiety ..... | C191  | Check  |
| PLAT395_ALERT_2_G | Deviating X-O-Y Angle from 120 Deg for O1        | 120.0 | Degree |
| PLAT395_ALERT_2_G | Deviating X-O-Y Angle from 120 Deg for O3        | 122.0 | Degree |
| PLAT395_ALERT_2_G | Deviating X-O-Y Angle from 120 Deg for O5        | 123.0 | Degree |
| PLAT395_ALERT_2_G | Deviating X-O-Y Angle from 120 Deg for O6        | 124.0 | Degree |
| PLAT395_ALERT_2_G | Deviating X-O-Y Angle from 120 Deg for O9        | 121.1 | Degree |
| PLAT395_ALERT_2_G | Deviating X-O-Y Angle from 120 Deg for O10       | 124.3 | Degree |
| PLAT395_ALERT_2_G | Deviating X-O-Y Angle from 120 Deg for O11       | 120.2 | Degree |
| PLAT395_ALERT_2_G | Deviating X-O-Y Angle from 120 Deg for O14       | 122.3 | Degree |
| PLAT395_ALERT_2_G | Deviating X-O-Y Angle from 120 Deg for O16       | 118.2 | Degree |
| PLAT395_ALERT_2_G | Deviating X-O-Y Angle from 120 Deg for O18       | 124.5 | Degree |
| PLAT395_ALERT_2_G | Deviating X-O-Y Angle from 120 Deg for O21       | 125.9 | Degree |
| PLAT395_ALERT_2_G | Deviating X-O-Y Angle from 120 Deg for O22       | 116.5 | Degree |
| PLAT398_ALERT_2_G | Deviating C-O-C Angle from 120 Deg for O58       | 107.3 | Degree |
| PLAT398_ALERT_2_G | Deviating C-O-C Angle from 120 Deg for O55       | 104.9 | Degree |
| PLAT720_ALERT_4_G | Number of Unusual/Non-Standard Labels .....      | 1     | Note   |
| PLAT860_ALERT_3_G | Number of Least-Squares Restraints .....         | 2750  | Note   |
| PLAT909_ALERT_3_G | Percentage of I>2sig(I) Data at Theta(Max) Still | 37%   | Note   |
| PLAT910_ALERT_3_G | Missing # of FCF Reflection(s) Below Theta(Min). | 1     | Note   |
| PLAT913_ALERT_3_G | Missing # of Very Strong Reflections in FCF .... | 1     | Note   |
| PLAT933_ALERT_2_G | Number of OMIT Records in Embedded .res File ... | 22    | Note   |

---

1 **ALERT level A** = Most likely a serious problem - resolve or explain  
5 **ALERT level B** = A potentially serious problem, consider carefully  
42 **ALERT level C** = Check. Ensure it is not caused by an omission or oversight  
46 **ALERT level G** = General information/check it is not something unexpected

4 **ALERT type 1** CIF construction/syntax error, inconsistent or missing data  
61 **ALERT type 2** Indicator that the structure model may be wrong or deficient  
15 **ALERT type 3** Indicator that the structure quality may be low  
14 **ALERT type 4** Improvement, methodology, query or suggestion  
0 **ALERT type 5** Informative message, check

---

It is advisable to attempt to resolve as many as possible of the alerts in all categories. Often the minor alerts point to easily fixed oversights, errors and omissions in your CIF or refinement strategy, so attention to these fine details can be worthwhile. In order to resolve some of the more serious problems it may be necessary to carry out additional measurements or structure refinements. However, the purpose of your study may justify the reported deviations and the more serious of these should normally be commented upon in the discussion or experimental section of a paper or in the "special\_details" fields of the CIF. checkCIF was carefully designed to identify outliers and unusual parameters, but every test has its limitations and alerts that are not important in a particular case may appear. Conversely, the absence of alerts does not guarantee there are no aspects of the results needing attention. It is up to the individual to critically assess their own results and, if necessary, seek expert advice.

### **Publication of your CIF in IUCr journals**

A basic structural check has been run on your CIF. These basic checks will be run on all CIFs submitted for publication in IUCr journals (*Acta Crystallographica*, *Journal of Applied Crystallography*, *Journal of Synchrotron Radiation*); however, if you intend to submit to *Acta Crystallographica Section C* or *E* or *IUCrData*, you should make sure that full publication checks are run on the final version of your CIF prior to submission.

### **Publication of your CIF in other journals**

Please refer to the *Notes for Authors* of the relevant journal for any special instructions relating to CIF submission.

---

**PLATON version of 13/08/2017; check.def file version of 27/07/2017**

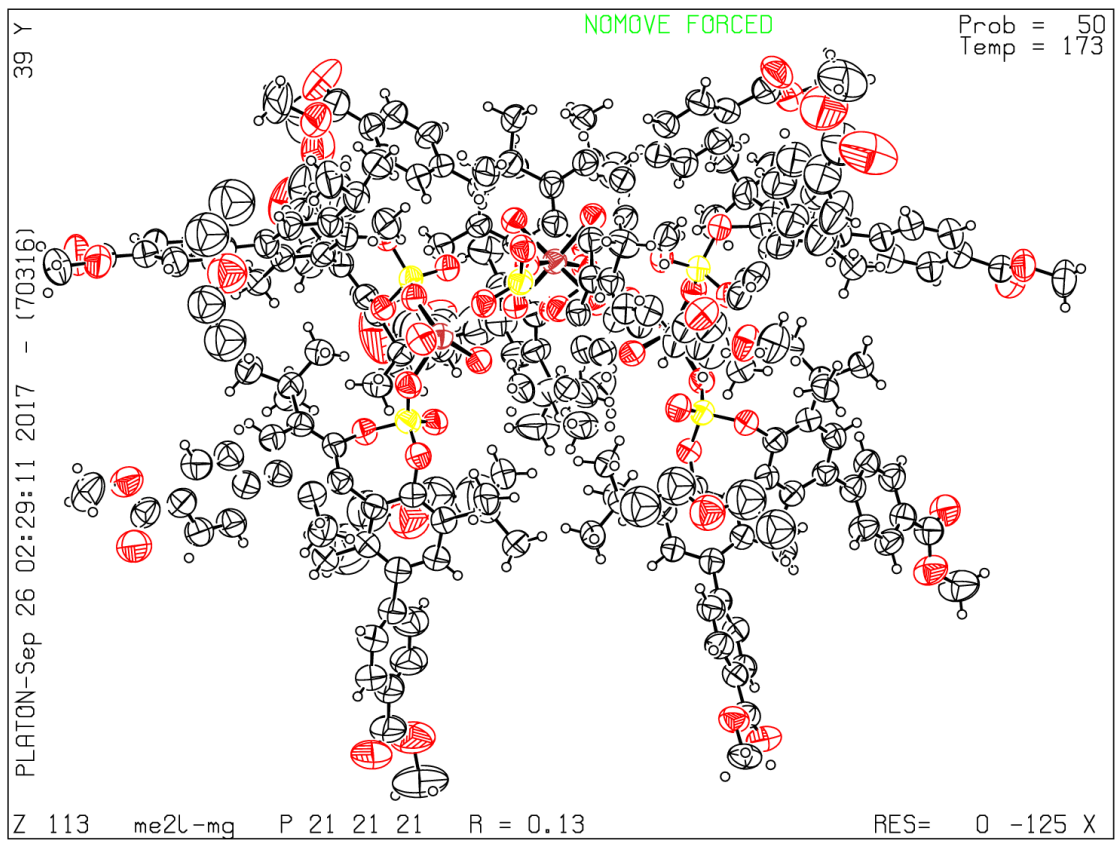

# checkCIF/PLATON report

Structure factors have been supplied for datablock(s) me2l-mn

THIS REPORT IS FOR GUIDANCE ONLY. IF USED AS PART OF A REVIEW PROCEDURE FOR PUBLICATION, IT SHOULD NOT REPLACE THE EXPERTISE OF AN EXPERIENCED CRYSTALLOGRAPHIC REFEREE.

No syntax errors found.      CIF dictionary      Interpreting this report

## Datablock: me2l-mn

---

|                 |                                        |                                        |             |
|-----------------|----------------------------------------|----------------------------------------|-------------|
| Bond precision: | C-C = 0.0242 A                         | Wavelength=1.54178                     |             |
| Cell:           | a=22.1113(18)                          | b=33.662(3)                            | c=37.400(3) |
|                 | alpha=90                               | beta=90                                | gamma=90    |
| Temperature:    | 173 K                                  |                                        |             |
|                 | Calculated                             | Reported                               |             |
| Volume          | 27837(4)                               | 27837(4)                               |             |
| Space group     | P 21 21 21                             | P 21 21 21                             |             |
| Hall group      | P 2ac 2ab                              | P 2ac 2ab                              |             |
| Moiety formula  | C228 H240 Mn3 O56 P6, C6<br>O, 2(C4 O) | C228 H240 Mn3 O56 P6, C6<br>O, 2(C4 O) |             |
| Sum formula     | C242 H240 Mn3 O59 P6                   | C242 H240 Mn3 O59 P6                   |             |
| Mr              | 4442.97                                | 4442.97                                |             |
| Dx,g cm-3       | 1.060                                  | 1.060                                  |             |
| Z               | 4                                      | 4                                      |             |
| Mu (mm-1)       | 1.968                                  | 1.968                                  |             |
| F000            | 9316.0                                 | 9316.0                                 |             |
| F000'           | 9344.99                                |                                        |             |
| h,k,lmax        | 22,34,38                               | 22,34,38                               |             |
| Nref            | 32225[ 17274]                          | 31396                                  |             |
| Tmin,Tmax       | 0.517,0.675                            |                                        |             |
| Tmin'           | 0.356                                  |                                        |             |

Correction method= Not given

Data completeness= 1.82/0.97      Theta(max)= 52.873

R(reflections)= 0.1391( 26703)      wR2(reflections)= 0.3769( 31396)

S = 1.623      Npar= 2580

---

The following ALERTS were generated. Each ALERT has the format

**test-name\_ALERT\_alert-type\_alert-level.**

Click on the hyperlinks for more details of the test.

---

**Alert level A**

THETM01\_ALERT\_3\_A The value of sine(theta\_max)/wavelength is less than 0.550  
Calculated sin(theta\_max)/wavelength = 0.5171  
PLAT413\_ALERT\_2\_A Short Inter XH3 .. XHn H3LA .. H3UA .. 1.85 Ang.  
PLAT602\_ALERT\_2\_A VERY LARGE Solvent Accessible VOID(S) in Structure ! Info

---

**Alert level B**

PLAT035\_ALERT\_1\_B \_chemical\_absolute\_configuration info Not given Please Do !  
PLAT057\_ALERT\_3\_B Correction for Absorption Required RT(exp) ... 1.30 Do !  
PLAT084\_ALERT\_3\_B High wR2 Value (i.e. > 0.25) ..... 0.38 Report  
PLAT201\_ALERT\_2\_B Isotropic non-H Atoms in Main Residue(s) ..... 2 Report  
PLAT242\_ALERT\_2\_B Low 'MainMol' Ueq as Compared to Neighbors of 058 Check  
PLAT341\_ALERT\_3\_B Low Bond Precision on C-C Bonds ..... 0.02425 Ang.  
PLAT413\_ALERT\_2\_B Short Inter XH3 .. XHn H7IA .. H7UA .. 1.97 Ang.  
PLAT430\_ALERT\_2\_B Short Inter D...A Contact O40 .. O55 .. 2.78 Ang.  
PLAT934\_ALERT\_3\_B Number of (Iobs-Icalc)/SigmaW > 10 Outliers .... 10 Check  
PLAT987\_ALERT\_1\_B The Flack x is >> 0 - Do a BASF/TWIN Refinement Please Check

---

**Alert level C**

PLAT018\_ALERT\_1\_C \_diffrn\_measured\_fraction\_theta\_max .NE. \*\_full ! Check  
PLAT082\_ALERT\_2\_C High R1 Value ..... 0.14 Report  
PLAT090\_ALERT\_3\_C Poor Data / Parameter Ratio (Zmax > 18) ..... 6.62 Note  
PLAT202\_ALERT\_3\_C Isotropic non-H Atoms in Anion/Solvent ..... 17 Check  
PLAT220\_ALERT\_2\_C Non-Solvent Resd 1 C Ueq(max)/Ueq(min) Range 4.9 Ratio  
PLAT220\_ALERT\_2\_C Non-Solvent Resd 1 O Ueq(max)/Ueq(min) Range 4.7 Ratio  
PLAT222\_ALERT\_3\_C Non-Solvent Resd 1 H Uiso(max)/Uiso(min) Range 5.7 Ratio  
PLAT241\_ALERT\_2\_C High 'MainMol' Ueq as Compared to Neighbors of C9 Check  
PLAT241\_ALERT\_2\_C High 'MainMol' Ueq as Compared to Neighbors of C48 Check  
PLAT241\_ALERT\_2\_C High 'MainMol' Ueq as Compared to Neighbors of C101 Check  
PLAT241\_ALERT\_2\_C High 'MainMol' Ueq as Compared to Neighbors of C102 Check  
PLAT241\_ALERT\_2\_C High 'MainMol' Ueq as Compared to Neighbors of C114 Check  
PLAT241\_ALERT\_2\_C High 'MainMol' Ueq as Compared to Neighbors of C153 Check  
PLAT241\_ALERT\_2\_C High 'MainMol' Ueq as Compared to Neighbors of C170 Check  
PLAT241\_ALERT\_2\_C High 'MainMol' Ueq as Compared to Neighbors of C199 Check  
PLAT241\_ALERT\_2\_C High 'MainMol' Ueq as Compared to Neighbors of C201 Check  
PLAT242\_ALERT\_2\_C Low 'MainMol' Ueq as Compared to Neighbors of Mn1 Check  
PLAT242\_ALERT\_2\_C Low 'MainMol' Ueq as Compared to Neighbors of Mn3 Check  
PLAT242\_ALERT\_2\_C Low 'MainMol' Ueq as Compared to Neighbors of O48 Check  
PLAT242\_ALERT\_2\_C Low 'MainMol' Ueq as Compared to Neighbors of C24 Check  
PLAT242\_ALERT\_2\_C Low 'MainMol' Ueq as Compared to Neighbors of C40 Check  
PLAT242\_ALERT\_2\_C Low 'MainMol' Ueq as Compared to Neighbors of C100 Check  
PLAT242\_ALERT\_2\_C Low 'MainMol' Ueq as Compared to Neighbors of C103 Check  
PLAT242\_ALERT\_2\_C Low 'MainMol' Ueq as Compared to Neighbors of C104 Check  
PLAT242\_ALERT\_2\_C Low 'MainMol' Ueq as Compared to Neighbors of C136 Check  
PLAT242\_ALERT\_2\_C Low 'MainMol' Ueq as Compared to Neighbors of C167 Check  
PLAT242\_ALERT\_2\_C Low 'MainMol' Ueq as Compared to Neighbors of C174 Check  
PLAT242\_ALERT\_2\_C Low 'MainMol' Ueq as Compared to Neighbors of C200 Check  
PLAT242\_ALERT\_2\_C Low 'MainMol' Ueq as Compared to Neighbors of C209 Check  
PLAT242\_ALERT\_2\_C Low 'MainMol' Ueq as Compared to Neighbors of C219 Check  
PLAT242\_ALERT\_2\_C Low 'MainMol' Ueq as Compared to Neighbors of C230 Check  
PLAT243\_ALERT\_4\_C High 'Solvent' Ueq as Compared to Neighbors of C125 Check  
PLAT244\_ALERT\_4\_C Low 'Solvent' Ueq as Compared to Neighbors of C148 Check  
PLAT244\_ALERT\_4\_C Low 'Solvent' Ueq as Compared to Neighbors of C162 Check  
PLAT244\_ALERT\_4\_C Low 'Solvent' Ueq as Compared to Neighbors of C129 Check  
PLAT244\_ALERT\_4\_C Low 'Solvent' Ueq as Compared to Neighbors of O51 Check  
PLAT244\_ALERT\_4\_C Low 'Solvent' Ueq as Compared to Neighbors of C183 Check  
PLAT309\_ALERT\_2\_C Single Bonded Oxygen (C-O > 1.3 Ang) ..... O0AA Check  
PLAT334\_ALERT\_2\_C Small Average Benzene C-C Dist. C37 -C81 1.37 Ang.  
PLAT361\_ALERT\_2\_C Long C(sp3)-C(sp3) Bond C158 - C231 .. 1.66 Ang.



|                   |                                                  |                                 |       |    |      |    |       |        |
|-------------------|--------------------------------------------------|---------------------------------|-------|----|------|----|-------|--------|
| PLAT369_ALERT_2_C | Long                                             | C(sp2)-C(sp2) Bond              | C30   | -  | C40  | .. | 1.53  | Ang.   |
| PLAT369_ALERT_2_C | Long                                             | C(sp2)-C(sp2) Bond              | C46   | -  | C209 | .. | 1.54  | Ang.   |
| PLAT369_ALERT_2_C | Long                                             | C(sp2)-C(sp2) Bond              | C117  | -  | C215 | .. | 1.53  | Ang.   |
| PLAT369_ALERT_2_C | Long                                             | C(sp2)-C(sp2) Bond              | C147  | -  | C219 | .. | 1.53  | Ang.   |
| PLAT369_ALERT_2_C | Long                                             | C(sp2)-C(sp2) Bond              | C181  | -  | C205 | .. | 1.55  | Ang.   |
| PLAT412_ALERT_2_C | Short                                            | Intra XH3 .. XHn                | H3BA  | .. | H5MA | .. | 1.84  | Ang.   |
| PLAT412_ALERT_2_C | Short                                            | Intra XH3 .. XHn                | H9DA  | .. | H8KA | .. | 1.85  | Ang.   |
| PLAT413_ALERT_2_C | Short                                            | Inter XH3 .. XHn                | H0UA  | .. | H2UA | .. | 2.14  | Ang.   |
| PLAT430_ALERT_2_C | Short                                            | Inter D...A Contact             | O10   | .. | O34  | .. | 2.88  | Ang.   |
| PLAT430_ALERT_2_C | Short                                            | Inter D...A Contact             | O32   | .. | O50  | .. | 2.85  | Ang.   |
| PLAT906_ALERT_3_C | Large K value in the Analysis of Variance .....  |                                 |       |    |      |    | 2.273 | Check  |
| PLAT911_ALERT_3_C | Missing #                                        | FCF Refl Between THmin & STh/L= | 0.517 |    |      |    | 201   | Report |
| PLAT913_ALERT_3_C | Missing # of Very Strong Reflections in FCF .... |                                 |       |    |      |    | 4     | Note   |
| PLAT918_ALERT_3_C | Reflection(s) with I(obs) much Smaller I(calc) . |                                 |       |    |      |    | 13    | Check  |
| PLAT939_ALERT_3_C | Large Value of Not (SHELXL) Weight Optimized S . |                                 |       |    |      |    | 10.01 | Check  |
| PLAT977_ALERT_2_C | Check the Negative Difference Density on H2DA    |                                 |       |    |      |    | -0.34 | eA-3   |
| PLAT977_ALERT_2_C | Check the Negative Difference Density on H0UA    |                                 |       |    |      |    | -0.37 | eA-3   |
| PLAT978_ALERT_2_C | Number C-C Bonds with Positive Residual Density. |                                 |       |    |      |    | 0     | Info   |

### Alert level G

|                   |                                                  |                                  |                        |     |      |      |       |        |
|-------------------|--------------------------------------------------|----------------------------------|------------------------|-----|------|------|-------|--------|
| PLAT002_ALERT_2_G | Number of Distance or Angle Restraints on AtSite |                                  |                        |     |      |      | 62    | Note   |
| PLAT003_ALERT_2_G | Number of Uiso or Uij Restrained non-H Atoms ... |                                  |                        |     |      |      | 313   | Report |
| PLAT033_ALERT_4_G | Flack x Value Deviates > 3.0 * sigma from Zero . |                                  |                        |     |      |      | 0.112 | Note   |
| PLAT072_ALERT_2_G | SHELXL First Parameter in WGHT Unusually Large   |                                  |                        |     |      |      | 0.20  | Report |
| PLAT172_ALERT_4_G | The CIF-Embedded .res File Contains DFIX Records |                                  |                        |     |      |      | 38    | Report |
| PLAT174_ALERT_4_G | The CIF-Embedded .res File Contains FLAT Records |                                  |                        |     |      |      | 4     | Report |
| PLAT176_ALERT_4_G | The CIF-Embedded .res File Contains SADI Records |                                  |                        |     |      |      | 2     | Report |
| PLAT178_ALERT_4_G | The CIF-Embedded .res File Contains SIMU Records |                                  |                        |     |      |      | 1     | Report |
| PLAT187_ALERT_4_G | The CIF-Embedded .res File Contains RIGU Records |                                  |                        |     |      |      | 1     | Report |
| PLAT301_ALERT_3_G | Main Residue Disorder .....(Resd 1)..            |                                  |                        |     |      |      | 1%    | Note   |
| PLAT335_ALERT_2_G | Check Large C6 Ring                              | C-C Range                        | C22                    | -   | C134 | 0.19 | Ang.  |        |
| PLAT344_ALERT_2_G | Unusual sp?                                      | Angle Range in Solvent/Ion for . |                        |     |      | C148 | Check |        |
| PLAT344_ALERT_2_G | Unusual sp?                                      | Angle Range in Solvent/Ion for . |                        |     |      | C162 | Check |        |
| PLAT344_ALERT_2_G | Unusual sp?                                      | Angle Range in Solvent/Ion for . |                        |     |      | C169 | Check |        |
| PLAT344_ALERT_2_G | Unusual sp?                                      | Angle Range in Solvent/Ion for . |                        |     |      | C177 | Check |        |
| PLAT344_ALERT_2_G | Unusual sp?                                      | Angle Range in Solvent/Ion for . |                        |     |      | C235 | Check |        |
| PLAT344_ALERT_2_G | Unusual sp?                                      | Angle Range in Solvent/Ion for . |                        |     |      | C236 | Check |        |
| PLAT344_ALERT_2_G | Unusual sp?                                      | Angle Range in Solvent/Ion for . |                        |     |      | C129 | Check |        |
| PLAT344_ALERT_2_G | Unusual sp?                                      | Angle Range in Solvent/Ion for . |                        |     |      | C130 | Check |        |
| PLAT344_ALERT_2_G | Unusual sp?                                      | Angle Range in Solvent/Ion for . |                        |     |      | C178 | Check |        |
| PLAT344_ALERT_2_G | Unusual sp?                                      | Angle Range in Solvent/Ion for . |                        |     |      | C237 | Check |        |
| PLAT344_ALERT_2_G | Unusual sp?                                      | Angle Range in Solvent/Ion for . |                        |     |      | C125 | Check |        |
| PLAT344_ALERT_2_G | Unusual sp?                                      | Angle Range in Solvent/Ion for . |                        |     |      | C183 | Check |        |
| PLAT344_ALERT_2_G | Unusual sp?                                      | Angle Range in Solvent/Ion for . |                        |     |      | C239 | Check |        |
| PLAT344_ALERT_2_G | Unusual sp?                                      | Angle Range in Solvent/Ion for . |                        |     |      | C240 | Check |        |
| PLAT367_ALERT_2_G | Long?                                            | C(sp?)-C(sp?) Bond               | C148                   | -   | C235 | ..   | 1.52  | Ang.   |
| PLAT367_ALERT_2_G | Long?                                            | C(sp?)-C(sp?) Bond               | C148                   | -   | C236 | ..   | 1.51  | Ang.   |
| PLAT367_ALERT_2_G | Long?                                            | C(sp?)-C(sp?) Bond               | C162                   | -   | C169 | ..   | 1.51  | Ang.   |
| PLAT367_ALERT_2_G | Long?                                            | C(sp?)-C(sp?) Bond               | C130                   | -   | C237 | ..   | 1.57  | Ang.   |
| PLAT380_ALERT_4_G | Incorrectly? Oriented X(sp2)-Methyl Moiety ..... |                                  |                        |     |      |      | C141  | Check  |
| PLAT395_ALERT_2_G | Deviating                                        | X-O-Y                            | Angle from 120 Deg for | 01  |      |      | 121.4 | Degree |
| PLAT395_ALERT_2_G | Deviating                                        | X-O-Y                            | Angle from 120 Deg for | 03  |      |      | 121.4 | Degree |
| PLAT395_ALERT_2_G | Deviating                                        | X-O-Y                            | Angle from 120 Deg for | 05  |      |      | 120.2 | Degree |
| PLAT395_ALERT_2_G | Deviating                                        | X-O-Y                            | Angle from 120 Deg for | 07  |      |      | 122.1 | Degree |
| PLAT395_ALERT_2_G | Deviating                                        | X-O-Y                            | Angle from 120 Deg for | 013 |      |      | 120.4 | Degree |
| PLAT395_ALERT_2_G | Deviating                                        | X-O-Y                            | Angle from 120 Deg for | 014 |      |      | 116.0 | Degree |
| PLAT395_ALERT_2_G | Deviating                                        | X-O-Y                            | Angle from 120 Deg for | 015 |      |      | 121.9 | Degree |
| PLAT395_ALERT_2_G | Deviating                                        | X-O-Y                            | Angle from 120 Deg for | 016 |      |      | 118.6 | Degree |
| PLAT395_ALERT_2_G | Deviating                                        | X-O-Y                            | Angle from 120 Deg for | 018 |      |      | 125.0 | Degree |
| PLAT395_ALERT_2_G | Deviating                                        | X-O-Y                            | Angle from 120 Deg for | 025 |      |      | 122.6 | Degree |

|                   |                                                  |               |                        |      |       |        |
|-------------------|--------------------------------------------------|---------------|------------------------|------|-------|--------|
| PLAT395_ALERT_2_G | Deviating                                        | X-O-Y         | Angle from 120 Deg for | 026  | 119.7 | Degree |
| PLAT395_ALERT_2_G | Deviating                                        | X-O-Y         | Angle from 120 Deg for | 035  | 122.4 | Degree |
| PLAT398_ALERT_2_G | Deviating                                        | C-O-C         | Angle from 120 Deg for | 057  | 109.0 | Degree |
| PLAT398_ALERT_2_G | Deviating                                        | C-O-C         | Angle from 120 Deg for | 058  | 105.9 | Degree |
| PLAT398_ALERT_2_G | Deviating                                        | C-O-C         | Angle from 120 Deg for | 01AA | 134.2 | Degree |
| PLAT720_ALERT_4_G | Number of Unusual/Non-Standard Labels            | .....         |                        |      | 246   | Note   |
| PLAT791_ALERT_4_G | The Model has Chirality at P3                    | (Chiral SPGR) |                        |      | S     | Verify |
| PLAT794_ALERT_5_G | Tentative Bond Valency for Mn2                   | (I) .....     |                        |      | 0.57  | Info   |
| PLAT860_ALERT_3_G | Number of Least-Squares Restraints               | .....         |                        |      | 4462  | Note   |
| PLAT909_ALERT_3_G | Percentage of I>2sig(I) Data at Theta(Max) Still |               |                        |      | 50%   | Note   |
| PLAT910_ALERT_3_G | Missing # of FCF Reflection(s) Below Theta(Min). |               |                        |      | 1     | Note   |

---

3 **ALERT level A** = Most likely a serious problem - resolve or explain  
10 **ALERT level B** = A potentially serious problem, consider carefully  
58 **ALERT level C** = Check. Ensure it is not caused by an omission or oversight  
51 **ALERT level G** = General information/check it is not something unexpected

3 **ALERT type 1** CIF construction/syntax error, inconsistent or missing data  
86 **ALERT type 2** Indicator that the structure model may be wrong or deficient  
17 **ALERT type 3** Indicator that the structure quality may be low  
15 **ALERT type 4** Improvement, methodology, query or suggestion  
1 **ALERT type 5** Informative message, check

---

It is advisable to attempt to resolve as many as possible of the alerts in all categories. Often the minor alerts point to easily fixed oversights, errors and omissions in your CIF or refinement strategy, so attention to these fine details can be worthwhile. In order to resolve some of the more serious problems it may be necessary to carry out additional measurements or structure refinements. However, the purpose of your study may justify the reported deviations and the more serious of these should normally be commented upon in the discussion or experimental section of a paper or in the "special\_details" fields of the CIF. checkCIF was carefully designed to identify outliers and unusual parameters, but every test has its limitations and alerts that are not important in a particular case may appear. Conversely, the absence of alerts does not guarantee there are no aspects of the results needing attention. It is up to the individual to critically assess their own results and, if necessary, seek expert advice.

### Publication of your CIF in IUCr journals

A basic structural check has been run on your CIF. These basic checks will be run on all CIFs submitted for publication in IUCr journals (*Acta Crystallographica*, *Journal of Applied Crystallography*, *Journal of Synchrotron Radiation*); however, if you intend to submit to *Acta Crystallographica Section C* or *E* or *IUCrData*, you should make sure that full publication checks are run on the final version of your CIF prior to submission.

### Publication of your CIF in other journals

Please refer to the *Notes for Authors* of the relevant journal for any special instructions relating to CIF submission.

---

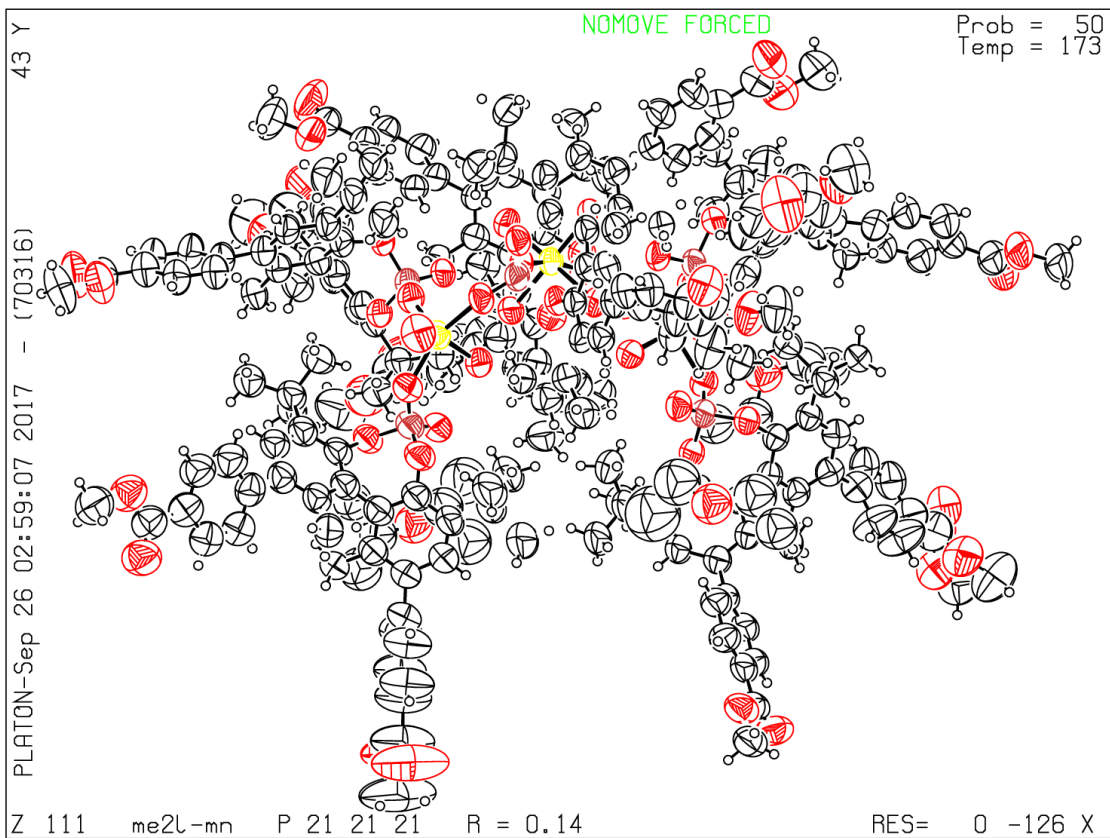

Supplement: 41467_2017_2335_MOESM5_ESM.pdf [file 41467_2017_2335_MOESM5_ESM.pdf]
