# Supplementary material for: Sixteen isostructural phosphonate metal-organic frameworks with controlled Lewis acidity and chemical stability for asymmetric catalysis
Source: PubMed Central journal article supplement (PMC5736719; doi:10.1038/s41467-017-02335-0), 2017-12-19
Supplement: 41467_2017_2335_MOESM1_ESM.pdf [file 41467_2017_2335_MOESM1_ESM.pdf]

## Description of Additional Supplementary Files

File Name: Supplementary Data 1

Description: Cif combine

File Name: Supplementary Data 2

Description: Checkcif combine
