# Supplementary material for: Sixteen isostructural phosphonate metal-organic frameworks with controlled Lewis acidity and chemical stability for asymmetric catalysis
Source: PubMed Central journal article supplement (PMC5736719; doi:10.1038/s41467-017-02335-0), 2017-12-19
Supplement: 41467_2017_2335_MOESM3_ESM.pdf [file 41467_2017_2335_MOESM3_ESM.pdf]

## Supplementary Methods

### Synthesis of the ligand

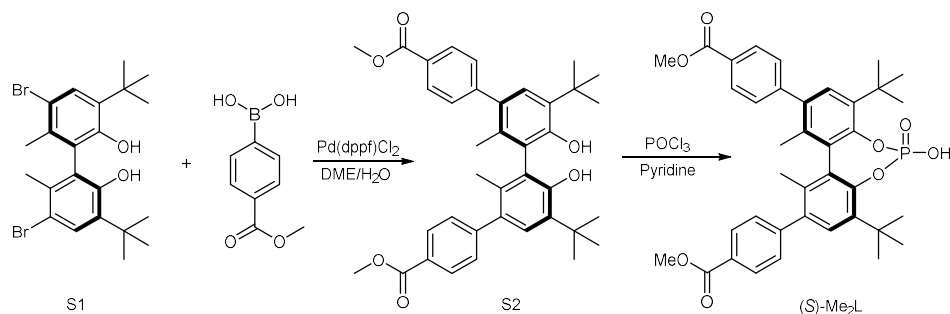

(*S*)-3,3'-di-*tert*-butyl-5,5'-dibromo-6,6'-dimethylbiphenyl-2,2'-diol (**S1**, 2 g, 4.15 mmol), 4-(methoxycarbonyl)phenylboronic acid (2.25 g, 12.45 mmol), and  $K_2CO_3$  (6.0 g, 41.5 mmol) in DME/ $H_2O$  (2/1, 60 mL) was degassed for 10 mins.  $Pd(dppf)Cl_2$  (100 mg, 0.12 mmol) was added, and the suspension was stirred under  $N_2$  for 10 h at 95 °C. After cooling, the mixture was concentrated and extracted with DCM. The brown solution was washed with brine, dried over  $Na_2SO_4$ , and then the solvent was removed under reduced pressure. The brown solid was purified by silica gel column chromatography with petroleum ether/DCM (5:1 v/v) as the eluent affording (*S*)-3,3'-di-*tert*-butyl-5,5'-di(4-methoxycarbonylphenyl)-6,6'-dimethylbiphenyl-2,2'-diol. Yield: (**S2**, 1.8 g, 73%).  $^1H$  NMR ( $CDCl_3$ )  $\delta$ : 8.08-8.10 (d, 4H, ArH), 7.42-7.44 (d, 4H, ArH), 7.26 (s, 2H, ArH), 5.17 (s, 2H, OH), 3.94 (s, 6H,  $OCH_3$ ), 1.88 (s, 6H,  $CH_3$ ), 1.44 (s, 18H,  $C(CH_3)_3$ ).  $^{13}C$  NMR ( $CDCl_3$ )  $\delta$ : 167.29, 152.28, 147.30, 134.55, 134.07, 133.35, 129.91, 129.64, 129.53, 128.54, 121.31, 52.34, 34.97, 29.71, 17.50. FTIR (KBr,  $cm^{-1}$ ): 3443(m), 2953(w), 2866(w), 1722(s), 1609(m), 1439(m), 1416(w), 1364(w), 1278(s), 1189(m), 1175(m), 1105(m), 1073(w), 1017(w), 961(w), 860(w), 779(w), 713(w), 604(w), 581(w), 516(w).

In a two-neck, 50 mL flame-dried flask, (*S*)-3,3'-di-*tert*-butyl-5,5'-di(4-methoxycarbonylphenyl)-6,6'-dimethylbiphenyl-2,2'-diol (**S2**, 1.8 g, 3 mmol) was added under  $N_2$ . Anhydrous pyridine (10 mL) was added, followed by addition of phosphorus oxychloride (0.6 mL, 6.0 mmol), and the solution was stirred under  $N_2$  for 24 h at 95 °C. After cooling to ambient temperature, deionized water (2.5 mL) was added, and the mixture was heated to 95 °C for 5 h. Upon cooling, the reaction mixture was slowly poured into ice-water and acidified to a pH of ~2 and extracted with DCM. The organic layer was washed with brine, dried over  $Na_2SO_4$  and evaporated under reduced pressure to give a brown solid. The crude product was

purified by column chromatography on silica gel (CH<sub>2</sub>Cl<sub>2</sub>/MeOH, 10:1, v/v) to give (*S*)-3,3'-di-*tert*-butyl-5,5'-di(4-methoxycarbonyl phenyl)-6,6'-dimethylbiphenyl-2,2'-hydrogen phosphate (**Me<sub>2</sub>L**, 1.57 g, 80%) as a white solid. <sup>1</sup>H NMR (CDCl<sub>3</sub>) δ: 8.08 (d, J = 8.3 Hz, 4H), 7.36 (d, J = 8.2 Hz, 4H), 7.25 (s, 2H), 3.94 (s, 6H), 1.89 (s, 6H), 1.50 (s, 18H). <sup>13</sup>C NMR (CDCl<sub>3</sub>) δ: 166.97, 146.84, 146.71, 142.76, 138.58, 138.54, 133.90, 129.51, 129.00, 128.76, 127.15, 52.17, 35.10, 31.40, 18.15. <sup>31</sup>P NMR (CDCl<sub>3</sub>) δ: -2.28.

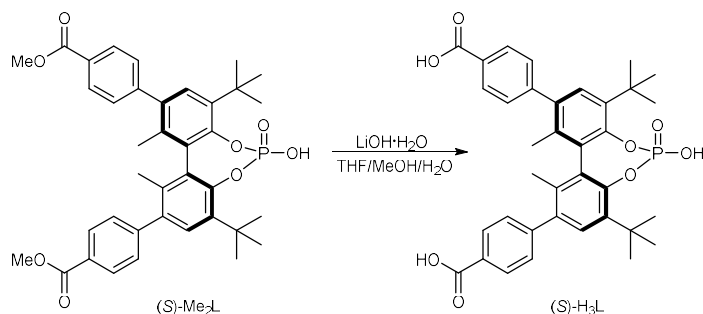

A solution of **Me<sub>2</sub>L** (1.57 g, 2.40 mmol) and LiOH·H<sub>2</sub>O (1.01 g, 24 mmol) in THF (10 mL), MeOH (30 mL) and H<sub>2</sub>O (30 mL) was heated to reflux and reacted for 8 h. After that, the solution was cooled to room temperature, acidified to pH = 3~4 with 2 M HCl, filtered and washed with distilled water. White solid was obtained (*S*)-H<sub>3</sub>L. Yield: (1.28 g, 85%). <sup>1</sup>H NMR(DMSO-*d*<sub>6</sub>) δ: 7.97-7.99 (d, 4H, ArH), 7.48-7.50 (d, 4H, ArH), 7.24 (s, 2H, ArH), 1.86 (s, 6H, CH<sub>3</sub>), 1.43 (s, 18H, C(CH<sub>3</sub>)<sub>3</sub>). <sup>13</sup>C NMR (DMSO-*d*<sub>6</sub>) δ: 167.79, 147.51, 146.37, 138.83, 138.22, 134.11, 130.33, 130.25, 130.13, 129.98, 129.24, 35.39, 31.75, 18.66. <sup>31</sup>P NMR (DMSO-*d*<sub>6</sub>) δ: 1.51. FTIR (KBr pellet): 3431(m), 2962(m), 2875(w), 2650(w), 2530(w), 1699(s), 1610(m), 1567(w), 1415(m), 1264(m), 1225(s), 1179(w), 1093(w), 1039(w), 1019(w), 907(w), 850(w), 875(w), 784(w), 728(w), 691(w), 611(w), 543(w). ESI-MS: *m/z* 627.26 (Calcd *m/z* 627.26 for [**L-H**]).

### Synthesis of 1-Mg/Ca/Mn/Co/Ni/Cu/Zn/Pd/Pb

A mixture of Mg(NO<sub>3</sub>)<sub>2</sub>·6H<sub>2</sub>O (Ca(NO<sub>3</sub>)<sub>2</sub>·4H<sub>2</sub>O/MnCl<sub>2</sub>·6H<sub>2</sub>O/Co(NO<sub>3</sub>)<sub>2</sub>·6H<sub>2</sub>O/Ni(NO<sub>3</sub>)<sub>2</sub>·6H<sub>2</sub>O/Cu(NO<sub>3</sub>)<sub>2</sub>·6H<sub>2</sub>O/Zn(NO<sub>3</sub>)<sub>2</sub>·6H<sub>2</sub>O/PdCl<sub>2</sub>/Pb(NO<sub>3</sub>)<sub>2</sub>·6H<sub>2</sub>O, 0.04 mmol), H<sub>3</sub>L (20 mg, 0.03 mmol), MeOH (5 mL) and HOAc (0.5mL) was sealed in a 10 mL vial with a screw cap and heated at 80 °C for 1 day. The mixture was cooled to room temperature, then block-like crystals were obtained, washed with ether and dried in air.

Yield: 80%, 75%, 72%, 76%, 72%, 68%, 77%, 82% and 61% for **1-Mg/Ca/Mn/Co/Ni/Cu/Zn/Pd/Pb** (based on metal salts), respectively.

**1-Mg:** Anal (%). Calcd for  $[\text{Mg}_3\text{L}_2(\text{H}_2\text{O})_2] \cdot 2\text{CH}_3\text{OH} \cdot 2\text{H}_2\text{O} / \text{C}_{74}\text{H}_{84}\text{Mg}_3\text{O}_{22}\text{P}_2$ : C, 60.86; H, 5.80. Found: C, 59.82; H, 5.73. FTIR (KBr pellet): 3417(m), 2962(m), 2922(w), 2874(w), 1608(s), 1547(m), 1407(s), 1249(m), 1239(m), 1183(w), 1105(s), 1072(w), 1040(m), 986(w), 878(w), 851(w), 793(w), 728(w), 694(w), 620(w), 551(w).

**1-Ca:** Anal (%). Calcd for  $[\text{Ca}_3\text{L}_2(\text{H}_2\text{O})_2] \cdot 2\text{CH}_3\text{OH} \cdot 2\text{H}_2\text{O} / \text{C}_{74}\text{H}_{84}\text{Ca}_3\text{O}_{22}\text{P}_2$ : C, 58.95; H, 5.62. Found: C, 57.88; H, 5.57. FTIR (KBr pellet): 3409(m), 3228(w), 2961(m), 2873(w), 1608(s), 1544(m), 1405(s), 1235(m), 1183(w), 1102(s), 1040(m), 1020(w), 986(w), 910(w), 874(w), 850(w), 792(w), 728(w), 695(w), 620(w), 551(w).

**1-Mn:** Anal (%). Calcd for  $[\text{Mn}_3\text{L}_2(\text{H}_2\text{O})_2] \cdot 2\text{CH}_3\text{OH} \cdot 2\text{H}_2\text{O} / \text{C}_{74}\text{H}_{84}\text{Mn}_3\text{O}_{22}\text{P}_2$ : C, 57.26; H, 5.45. Found: C, 56.31; H, 5.38. FTIR (KBr pellet): 3423(m), 2962(m), 2931(w), 2873(w), 1609(s), 1549(m), 1406(s), 1250(m), 1235(m), 1183(w), 1105(s), 1071(w), 1040(m), 985(w), 911(w), 880(w), 850(w), 792(w), 728(w), 694(w), 620(w), 551(w).

**1-Co:** Anal (%). Calcd for  $[\text{Co}_3\text{L}_2(\text{H}_2\text{O})_2] \cdot 2\text{CH}_3\text{OH} \cdot 2\text{H}_2\text{O} / \text{C}_{74}\text{H}_{84}\text{Co}_3\text{O}_{22}\text{P}_2$ : C, 56.82; H, 5.41. Found: C, 55.90; H, 5.38. FTIR (KBr pellet): 3419(m), 2962(m), 2926(w), 2874(w), 1608(s), 1546(m), 1405(s), 1236(m), 1183(w), 1104(s), 1040(m), 986(w), 910(w), 877(w), 851(w), 792(w), 728(w), 694(w), 620(w), 551(w).

**1-Ni:** Anal (%). Calcd for  $[\text{Ni}_3\text{L}_2(\text{H}_2\text{O})_2] \cdot 2\text{CH}_3\text{OH} \cdot 4\text{H}_2\text{O} / \text{C}_{74}\text{H}_{88}\text{Ni}_3\text{O}_{24}\text{P}_2$ : C, 55.57; H, 5.55. Found: C, 54.87; H, 5.48. FTIR (KBr pellet): 3425(m), 2962(m), 2926(w), 2875(w), 1608(s), 1548(m), 1406(s), 1238(m), 1182(w), 1103(s), 1040(m), 985(w), 910(w), 874(w), 850(w), 792(w), 728(w), 694(w), 620(w), 551(w).

**1-Cu:** Anal (%). Calcd for  $[\text{Cu}_3\text{L}_2(\text{H}_2\text{O})_2] \cdot 2\text{CH}_3\text{OH} \cdot 2\text{H}_2\text{O} / \text{C}_{74}\text{H}_{84}\text{Cu}_3\text{O}_{22}\text{P}_2$ : C, 56.32; H, 5.37. Found: C, 55.53; H, 5.33. FTIR (KBr pellet): 3420(m), 2962(m), 2931(w), 2875(w), 1609(s), 1548(m), 1405(s), 1235(m), 1182(w), 1104(s), 1040(m), 1021(w), 986(w), 910(w), 879(w), 851(w), 792(w), 728(w), 694(w), 620(w), 551(w).

**1-Zn:** Anal (%). Calcd for  $[\text{Zn}_3\text{L}_2(\text{H}_2\text{O})_2] \cdot 2\text{CH}_3\text{OH} \cdot 2\text{H}_2\text{O} / \text{C}_{74}\text{H}_{84}\text{O}_{22}\text{P}_2\text{Zn}_3$ : C, 56.13; H, 5.35. Found: C, 55.16; H, 5.30. FTIR (KBr pellet): 3410(m), 2962(m), 2926(w), 2873(w), 1609(s), 1549(m), 1407(s), 1242(m), 1183(w), 1107(s), 1040(m), 986(w), 911(w), 880(w), 851(w), 793(w), 728(w), 694(w), 620(w), 551(w).

**1-Pb:** Anal (%). Calcd for  $[\text{Pb}_3\text{L}_2(\text{H}_2\text{O})_2] \cdot 2\text{CH}_3\text{OH} \cdot 3\text{H}_2\text{O} / \text{C}_{74}\text{H}_{86}\text{O}_{23}\text{P}_2\text{Pb}_3$ : C, 43.05; H, 4.27. Found: C, 43.92; H, 4.32. FTIR (KBr pellet): 3405(m), 2962(m), 2926(w),

2870(w), 1608(s), 1542(m), 1409(s), 1234(m), 1182(w), 1106(s), 1040(m), 985(w), 884(w), 851(w), 792(w), 728(w), 694(w), 620(w), 551(w).

**1-Pd:** Anal (%). Calcd for  $[\text{Pd}_3\text{L}_2(\text{H}_2\text{O})_2] \cdot 2\text{CH}_3\text{OH} \cdot 3\text{H}_2\text{O} / \text{C}_{74}\text{H}_{86}\text{O}_{23}\text{P}_2\text{Pd}_3$ : C, 51.53; H, 5.03. Found: C, 50.72; H, 4.97. FTIR (KBr pellet): 3393(m), 2963(m), 2875(w), 1609(s), 1542(m), 1400(s), 1239(m), 1182(w), 1106(s), 1040(m), 986(w), 910(w), 881(w), 851(w), 792(w), 728(w), 694(w), 621(w), 550(w).

### Synthesis of 1-Cr/Fe/Al/Ga

A mixture of  $\text{Cr}(\text{acac})_3$  ( $\text{Fe}(\text{acac})_3/\text{AlCl}_3/\text{GaCl}_3$ , 0.04 mmol),  $\text{H}_3\text{L}$  (20 mg, 0.03 mmol), MeOH (1 mL) and HOAc (0.5 mL) was sealed in a 10 mL vial with a screw cap and heated at 80 °C for 2 days. The mixture was cooled to room temperature, then block-like crystals were obtained, washed with ether and dried in air. Yield: 80%, 68%, 60% and 80% (based on metal salts) for **1-Cr/Fe/Al/Ga**, respectively.

**1-Cr:** Anal (%). Calcd for  $[\text{Cr}_3\text{L}_2(\text{OAc})(\text{H}_2\text{O})][\text{OAc}]_2 \cdot 4\text{H}_2\text{O} / \text{C}_{78}\text{H}_{87}\text{Cr}_3\text{O}_{27}\text{P}_2$ : C, 55.95; H, 5.24. Found: C, 55.12; H, 5.30. FTIR (KBr pellet): 3409(m), 3219(m), 2963(m), 2875(m), 1609(s), 1550(m), 1406(s), 1240(m), 1180(w), 1106(s), 1040(m), 985(w), 882(m), 851(m), 792(m), 728(m), 695(w), 621(w), 551(w).

**1-Fe:** Anal (%). Calcd for  $[\text{Fe}_3\text{L}_2(\text{OAc})(\text{H}_2\text{O})][\text{OAc}]_2 \cdot 4\text{H}_2\text{O} / \text{C}_{78}\text{H}_{87}\text{Cr}_3\text{O}_{27}\text{P}_2$ : C, 55.57; H, 5.20. Found: C, 54.62; H, 5.11. FTIR (KBr pellet): 3419(m), 2961(w), 2924(w), 2875(w), 1608(s), 1544(m), 1404(s), 1240(m), 1178(w), 1102(s), 1039(m), 985(w), 911(w), 873(w), 850(w), 793(w), 728(w), 695(w), 620(w), 551(w).

**1-Al:** Anal (%). Calcd for  $[\text{Al}_3\text{L}_2(\text{OAc})(\text{H}_2\text{O})][\text{OAc}]_2 \cdot 3\text{H}_2\text{O} / \text{C}_{78}\text{H}_{85}\text{Al}_3\text{O}_{26}\text{P}_2$ : C, 59.24; H, 5.42. Found: C, 58.42; H, 5.35. FTIR (KBr pellet): 3415(m), 2962(m), 2922(w), 2874(w), 1609(s), 1548(m), 1405(s), 1251(m), 1240(m), 1183(w), 1105(s), 1071(w), 1040(m), 986(w), 911(w), 879(w), 850(w), 792(w), 728(w), 694(w), 620(w), 550(w).

**1-Ga:** Anal (%). Calcd for  $[\text{Ga}_3\text{L}_2(\text{OAc})(\text{H}_2\text{O})][\text{OAc}]_2 \cdot 4\text{H}_2\text{O} / \text{C}_{78}\text{H}_{85}\text{Ga}_3\text{O}_{26}\text{P}_2$ : C, 54.80; H, 5.01. Found: C, 53.76; H, 4.97. FTIR (KBr pellet): 3409(m), 2962(w), 2873(w), 1608(s), 1544(m), 1405(s), 1235(m), 1183(w), 1102(s), 1072(w), 1040(m), 1020(w), 986(w), 911(w), 874(w), 850(w), 792(w), 728(w), 695(w), 620(w), 551(w).

### Synthesis of 1-Zr/Ti/Sn

A mixture of  $\text{Zr}(\text{NO}_3)_4 \cdot 5\text{H}_2\text{O} / (\text{Ti}(\text{O}-i\text{Pr})_4 / \text{SnCl}_4 \cdot 6\text{H}_2\text{O}$ , 0.04 mmol),  $\text{H}_3\text{L}$  (20 mg, 0.03 mmol), MeOH (3 mL) and HOAc (0.5 mL) was sealed in a 10 mL vial with a screw cap and heated at 80 °C for 2 days. The mixture was cooled to room



temperature, then yellow block-like crystals were obtained, washed with ether and dried in air. Yield: 70%, 70% and 52% for **1-Zr/Ti/Sn** (based on metal salts), respectively.

**1-Zr**: Anal (%). Calcd for  $[\text{Zr}_3\text{L}_2(\text{OAc})(\text{H}_2\text{O})][\text{OAc}]_2[\text{OH}]_3 \cdot 3\text{H}_2\text{O}/\text{C}_{78}\text{H}_{88}\text{O}_{29}\text{P}_2\text{Zr}_3$ : C, 51.33; H, 4.86. Found: C, 50.82; H, 4.81. FTIR (KBr pellet): 3424(m), 2962(w), 2931(w), 2875(w), 1608(s), 1544(m), 1405(s), 1237(m), 1178(w), 1102(s), 1040(m), 987(w), 875(w), 851(w), 793(w), 728(w), 695(w), 619(w), 550(w).

**1-Ti**: Anal (%). Calcd for  $[\text{Ti}_3\text{L}_2(\text{OAc})(\text{H}_2\text{O})][\text{OAc}]_2[\text{OH}]_3 \cdot 3\text{H}_2\text{O}/\text{C}_{78}\text{H}_{88}\text{O}_{29}\text{P}_2\text{Ti}_3$ : C, 55.27; H, 5.23. Found: C, 54.62; H, 5.17. FTIR (KBr pellet): 3417(m), 2962(w), 2931(w), 2874(w), 1609(s), 1547(m), 1407(s), 1251(m), 1238(m), 1183(w), 1105(s), 1072(w), 1040(m), 986(w), 911(w), 879(w), 851(w), 792(w), 728(w), 694(w), 620(w), 552(w).

**1-Sn**: Anal (%). Calcd for  $[\text{Sn}_3\text{L}_2(\text{OAc})(\text{H}_2\text{O})][\text{OAc}]_2[\text{OH}]_3 \cdot 3\text{H}_2\text{O}/\text{C}_{78}\text{H}_{88}\text{O}_{29}\text{P}_2\text{Sn}_3$ : C, 49.11; H, 4.65. Found: C, 48.32; H, 4.57. FTIR (KBr pellet): 3412(m), 2962(m), 2931(w), 2873(w), 1609(s), 1549(m), 1405(s), 1243(m), 1183(w), 1106(s), 1040(m), 986(w), 911(w), 879(w), 851(w), 793(w), 728(w), 694(w), 620(w), 551(w).

### Synthesis of **Me<sub>2</sub>L-Cr/Mg/Mn**

A mixture of  $\text{Cr}(\text{acac})_3$  ( $\text{Mg}(\text{NO}_3)_2 \cdot 6\text{H}_2\text{O}/\text{MnCl}_2 \cdot 6\text{H}_2\text{O}$ , 0.10 mmol), **Me<sub>2</sub>L** (0.10 mmol) and DCE (3 mL) was sealed in a 10 mL bottle and stirred at room temperature for 1 h. The mixture was then evaporated to get the homogeneous catalyst. Yield: 80%, 85% and 88% for **Me<sub>2</sub>L-Cr/Mg/Mn**, respectively.

**Crystallization of Me<sub>2</sub>L-Mg/Mn/Cr for X-ray Structural Analyse: Me<sub>2</sub>L-Mg** (3 mg) was dissolved in diethyl ether (2 mL) and vaporize at 16 °C. After 6 h, colorless plate-like crystal was obtained.

**Me<sub>2</sub>L-Mn** (3 mg) was dissolved in isopropyl ether/diethylether (1/1; 2 mL) and vaporize at 16 °C. After 12 h, colorless plate-like crystal was obtained.

**Me<sub>2</sub>L-Cr** (3 mg) was dissolved in DME (2 mL) and vaporize at 16 °C. After 24 h, small green plate-like crystal was obtained.

Single-crystal X-ray diffraction showed that both **Me<sub>2</sub>L-Mn** and **Me<sub>2</sub>L-Mg** have a similar trimetal structure. However, the diffraction data for **Me<sub>2</sub>L-Cr** had extremely weak diffraction, but cell parameter determination showed that it has a isostructural structure, which was given in Supplementary Table 1

The structure of **Me<sub>2</sub>L-Mn/Mg**: The complex crystallizes in the chiral space group *P*2<sub>1</sub>2<sub>1</sub>2<sub>1</sub>. The structure has a trimeric M unit, which is linked together by six bridging phosphonate groups of six Me<sub>2</sub>L. The central metal is coordinated by six oxygen atoms from two bridging phosphonate groups and four water molecules, and each terminal metal is coordinated by two water and three oxygen atoms from three phosphonate groups. Adjacent metal ions are linked by one phosphonate group.

**Me<sub>2</sub>L-Cr**: Anal (%). Calcd for [Cr<sub>3</sub>(Me<sub>2</sub>L)<sub>6</sub>(H<sub>2</sub>O)<sub>5</sub>][OH]<sub>3</sub>·3H<sub>2</sub>O/C<sub>228</sub>H<sub>258</sub>O<sub>58</sub>P<sub>6</sub>Cr<sub>3</sub>: C, 64.15; H, 6.05. Found: C, 64.38; H, 5.84. ICP-OES analysis showed that the P/Cr ratio was ~1.9:1. FTIR (KBr pellet): 3434(m), 2953(m), 2925(m), 2869(w), 1725(s), 1609(m), 1566(w), 1435(m), 1417(w), 1365(w), 1275(s), 1230(w), 1179(w), 1113(m), 1101(s), 1038(m), 1020(m), 982(w), 892(w), 850(m), 817(w), 779(m), 727(w), 713(m), 617(w), 552(w), 526(w). *a* = 22.25, *b* = 34.49, *c* = 37.26,  $\alpha = \beta = \gamma = 90^\circ$ , *V* = 28597, Orthorhombic P.

**Me<sub>2</sub>L-Mg**: Anal (%). Calcd for [Mg<sub>3</sub>(Me<sub>2</sub>L)<sub>6</sub>(H<sub>2</sub>O)<sub>8</sub>]<sub>4</sub>H<sub>2</sub>O/C<sub>228</sub>H<sub>264</sub>O<sub>60</sub>P<sub>6</sub>Mg<sub>3</sub>: C, 64.83; H, 6.26;. Found: C, 65.43; H, 6.02. ICP-OES analysis showed that the P/Mg ratio was ~2.2:1. FTIR (KBr pellet): 3419(m), 2954(s), 2925(s), 2869(m), 1725(s), 1609(m), 1567(w), 1482(w), 1435(s), 1417(w), 1396(m), 1365(m), 1276(s), 1238(w), 1218(w), 1180(m), 1114(m), 1101(s), 1070(w), 1039(m), 1020(m), 985(w), 910(w), 870(m), 849(s), 825(w), 779(m), 727(m), 714(m), 613(w), 550(m).

**Me<sub>2</sub>L-Mn**: Anal (%). Calcd for [Mn<sub>3</sub>(Me<sub>2</sub>L)<sub>6</sub>(H<sub>2</sub>O)<sub>8</sub>]<sub>3</sub>H<sub>2</sub>O/C<sub>228</sub>H<sub>262</sub>O<sub>59</sub>P<sub>6</sub>Mn<sub>3</sub>: C, 63.72; H, 6.10;. Found: C, 64.02; H, 5.89. ICP-OES analysis showed that the P/Mn ratio was ~2.3:1. FTIR (KBr pellet): 3429(m), 2954(s), 2925(s), 2869(m), 1725(s), 1609(m), 1567(w), 1434(s), 1417(w), 1396(w), 1365(w), 1276(s), 1235(w), 1217(w), 1179(m), 1101(s), 1072(w), 1039(m), 1020(m), 985(w), 873(w), 850(m), 817(w), 779(m), 757(w), 727(w), 713(m), 613(w), 549(m), 465(w).

### Synthesis of H<sub>3</sub>L-Cr/Mg/Mn

A mixture of Cr(acac)<sub>3</sub> (Mg(NO<sub>3</sub>)<sub>2</sub>·6H<sub>2</sub>O/MnCl<sub>2</sub>·6H<sub>2</sub>O, 0.15 mmol), H<sub>3</sub>L (0.10 mmol) and DCE (3 mL) was sealed in a 10 mL bottle and stirred at room temperature for 1 h. The solid comes out and then filtered to get the catalyst which cannot dissolve in DCE. Quantitative yield: for H<sub>3</sub>L-Cr/Mg/Mn, respectively.

Efforts in getting single-crystal of H<sub>3</sub>L-Cr/Mg/Mn resulted in the related MOFs **1-Cr/Mg/Mn**, and we have obtained the parameter of unit cell (Supplementary Table 1).

**H<sub>3</sub>L-Cr:** Anal (%). Calcd for [Cr<sub>3</sub>L<sub>2</sub>(OH)(H<sub>2</sub>O)][OH]<sub>2</sub>·4H<sub>2</sub>O/C<sub>72</sub>H<sub>81</sub>Cr<sub>3</sub>O<sub>24</sub>P<sub>2</sub>: C, 55.85; H, 5.24. Found: C, 56.12; H, 5.03. ICP-OES analysis showed that the P/Cr ratio was ~1:1.7. FTIR (KBr pellet): 3414(m), 2963(m), 2873(w), 1663(w), 1614(s), 1547(m), 1408(s), 1385(s), 1251(s), 1235(s), 1184(m), 1107(s), 1040(m), 1020(w), 986(w), 911(w), 881(m), 851(m), 793(m), 728(m), 693(w), 621(m), 551(w).

**H<sub>3</sub>L-Mg:** Anal (%). Calcd for [Mg<sub>3</sub>L<sub>2</sub>(H<sub>2</sub>O)<sub>2</sub>]<sub>2</sub>·6H<sub>2</sub>O/C<sub>72</sub>H<sub>80</sub>Mg<sub>3</sub>O<sub>22</sub>P<sub>2</sub>: C, 61.89; H, 6.01;. Found: C, 60.53; H, 5.23. ICP-OES analysis showed that the P/Mg ratio was ~1:1.6. FTIR (KBr pellet): 3429(m), 2962(m), 2872(w), 1610(s), 1551(m), 1411(s), 1236(s), 1183(w), 1105(s), 1071(w), 1039(m), 1020(w), 988(w), 912(w), 878(m), 851(m), 793(m), 728(m), 694(w), 621(w), 552(w)

**H<sub>3</sub>L-Mn:** Anal (%). Calcd for [Mn<sub>3</sub>L<sub>2</sub>(H<sub>2</sub>O)<sub>2</sub>]<sub>2</sub>·4H<sub>2</sub>O/C<sub>74</sub>H<sub>84</sub>Mn<sub>3</sub>O<sub>22</sub>P<sub>2</sub>: C, 56.73; H, 5.25;. Found: C,55.83; H, 5.44. ICP-OES analysis showed that the P/Mn ratio was ~1:1.3. FTIR (KBr pellet): 3468(m), 3414(m), 2959(m), 2924(m), 2872(w), 1615(s), 1547(m), 1407(s), 1385(m), 1237(m), 1183(w), 1108(s), 1073(w), 1040(m), 1020(w), 986(w), 912(w), 878(m), 850(m), 793(w), 728(w), 694(w), 621(w), 552(w).

### Study of MOFs chemical stabilities

The stability of the pristine framework, evacuated sample and sample soaked in different solvents were confirmed by PXRD using 1-Cr/Mg/Mn/Zr as examples.

PXRD、BET and N<sub>2</sub> adsorption curves of the four MOFs after heating in methanol, toluene, DCE, water, and aqueous HCl (pH = 4) and NaOH solutions (pH = 9) for 7 days showed almost identical features, which support the framework rigidity during the experiments.

The slightly splitting and shifting of some peaks are explained by partial flexibility of the framework after the guest exchange.

### General procedure for asymmetric catalysis

Prior to catalysis, the MOFs should be activated: As-synthesized MOFs were exchanged with fresh methanol three times and then evacuated at 100 °C for two hours.

### The method used for calculating amount of MOF and metal.

$$[\text{Amount of MOF}] = [\text{Weight of MOF}] / [\text{Molecular Weight of MOF}]$$

For example **1-Cr**; the molecular formula is  $[\text{Cr}_3\text{L}_2(\text{OAc})(\text{H}_2\text{O})][\text{OAc}]_2 \cdot 4\text{H}_2\text{O}/\text{C}_{78}\text{H}_{87}\text{Cr}_3\text{O}_{27}\text{P}_2$  and the Molecular Weight of **1-Cr** is ~1673. When the weight of **1-Cr** is 3.4 mg, the amount of **MOF** is

$$(3.4 \text{ mg}) / (1673) = 0.002 \text{ mol}$$

There are three Cr ions and two **L** in the molecular formula, so the Amount of metal catalyst was:  $0.002 \cdot 3 = 0.006 \text{ mmol}$ . the Amount of **L** was:  $0.002 \cdot 2 = 0.004 \text{ mmol}$

### **Allylboration of aldehydes with 1-Cr**

To a 10 mL flame-dried Schlenk tube, the activated **1-Cr** (2 mol%, catalyst based on MOF), aldehydes (0.1 mmol) and dry DCE (0.5 mL) were added. The reaction mixture was stirred for 1 h and then cooled to  $-10 \text{ }^\circ\text{C}$  followed by dropwise addition of dry DCE (0.3 mL) containing allylboronic acid pinacol ester (0.12 mmol). The mixture was stirred for 12 h at this temperature and then purified by flash chromatography using EtOAc and petroleum ether.

The control reaction catalyzed by **Me<sub>2</sub>L-Cr** or **H<sub>3</sub>L-Cr** were performed according to the following procedure:

To a 10 mL flame-dried Schlenk tube, **Me<sub>2</sub>L-Cr** or **H<sub>3</sub>L-Cr** (6 mol% catalyst based on Cr) aldehydes (0.1 mmol) and dry DCE (0.5 mL) were added. The reaction mixture was stirred for 1 h and then cooled to  $-10 \text{ }^\circ\text{C}$  followed by dropwise addition of dry DCE (0.3 mL) containing allylboronic acid pinacol ester (0.12 mmol). The mixture was stirred for 12 h at this temperature and then purified by flash chromatography using EtOAc and petroleum ether.

The homogeneous control reaction catalyzed by **Me<sub>2</sub>L** or **H<sub>3</sub>L** was performed according to the following procedure:

To a flame-dried Schlenk tube was added with **Me<sub>2</sub>L** (0.004 mmol) or **H<sub>3</sub>L** (0.004 mmol), aldehydes (0.1 mmol) and dry DCE (0.5 mL). The reaction mixture was stirred for 1 h and then cooled to  $-10 \text{ }^\circ\text{C}$  followed by dropwise addition of dry DCE (0.3 mL) containing allylboronic acid pinacol ester (0.12 mmol). The mixture was stirred for 12 h at this temperature and then purified by flash chromatography using EtOAc and petroleum ether.

### **Propargylation of aldehydes with 1-Cr**

To a 10 mL flame-dried Schlenk tube, the activated **1-Cr** (2 mol%, catalyst based on MOF), aldehydes (0.1 mmol) and dry DCE (0.5 mL) were added. The reaction

mixture was stirred for about 1 h and then cooled to -10 °C followed by dropwise addition of dry DCE (0.3 mL) containing allenylboronic acid pinacol ester (0.15 mmol). The mixture was stirred for 12 h at this temperature and then purified by flash chromatography using EtOAc and petroleum ether.

The control reaction catalyzed by **Me<sub>2</sub>L-Cr** or **H<sub>3</sub>L-Cr** was performed according to the following procedure:

To a 10 mL flame-dried Schlenk tube, **Me<sub>2</sub>L-Cr** or **H<sub>3</sub>L-Cr** (6 mol% catalyst based on Cr), aldehydes (0.1 mmol) and dry DCE (0.5 mL) were added. The reaction mixture was stirred for 1 h and then cooled to -10 °C followed by dropwise addition of dry DCE (0.3 mL) containing allenylboronic acid pinacol ester (0.15 mmol). The mixture was stirred for 12 h at this temperature and then purified by flash chromatography using EtOAc and petroleum ether.

The homogeneous control reaction catalyzed by **Me<sub>2</sub>L** or **H<sub>3</sub>L** was performed according to the following procedure:

To a flame-dried Schlenk tube was added with **Me<sub>2</sub>L** (0.004 mmol) or **H<sub>3</sub>L** (0.004 mmol), aldehydes (0.1 mmol) and dry DCE (0.5 mL). The reaction mixture was stirred for 1 h and then cooled to -10 °C followed by dropwise addition of dry DCE (0.3 mL) containing allenylboronic acid pinacol ester (0.15 mmol). The mixture was stirred for 12 h at this temperature and then purified by flash chromatography using EtOAc and petroleum ether.

### **Friedel-Crafts alkylation catalyzed by 1-Mg**

To a 10 mL flame-dried Schlenk tube, the activated **1-Mg** (2 mol%, catalyst based on MOF), pyrrole (0.3 mmol) and dry DCE (0.3 mL) were added. The reaction mixture was stirred for 1 h and then cooled to -10 °C followed by dropwise addition of dry DCE (0.5 mL) containing nitroalkenes (0.1 mmol). The mixture was stirred for 12 h at this temperature and then purified by flash chromatography using EtOAc and petroleum ether.

The control reaction catalyzed by **Me<sub>2</sub>L-Mg** or **H<sub>3</sub>L-Mg** was performed according to the following procedure:

To a 10 mL flame-dried Schlenk tube, **Me<sub>2</sub>L-Mg** or **H<sub>3</sub>L-Mg** (6 mol% catalyst based on Mg), pyrrole (0.3 mmol) and dry DCE (0.3 mL) were added. The reaction mixture was stirred for 1 h and then cooled to -10 °C followed by dropwise addition of of dry DCE (0.5 mL) containing nitroalkenes (0.1 mmol). The mixture was stirred

for 12 h at this temperature and then purified by flash chromatography using EtOAc and petroleum ether.

The homogeneous control reaction catalyzed by  $\text{Me}_2\text{L}$  or  $\text{H}_3\text{L}$  was performed according to the following procedure:

To a flame-dried Schlenk tube was added with  $\text{Me}_2\text{L}$  (0.004 mmol) or  $\text{H}_3\text{L}$  (0.004 mmol), pyrrole (0.3 mmol) and dry DCE (0.3 mL). The reaction mixture was stirred for 1 h and then cooled to  $-10\text{ }^\circ\text{C}$  followed by dropwise addition of dry DCE (0.5 mL) containing nitroalkenes (0.1 mmol). The mixture was stirred for 12 h at this temperature and then purified by flash chromatography using EtOAc and petroleum ether.

### **Oxidation of sulfides with 1-Mn**

A 10 mL flame-dried Schlenk tube equipped with a stir bar and the activated **1-Mn** (2 mol%, catalyst based on MOF) was added followed by addition of sulfides (0.1 mmol). The mixture was added with DCE (0.5 mL) and stirred for 1 h, then cooled to  $-30\text{ }^\circ\text{C}$ . Aqueous  $\text{H}_2\text{O}_2$  (30%, 14  $\mu\text{L}$ , 1.2 equiv.) in DCE (0.3 mL) was added dropwise to the suspension and stirred for 4 h at this temperature. Purification by column chromatography on silica gel using EtOAc and petroleum ether as an eluent gave the desired sulfoxide. The ratios of sulfoxide/sulfone were determined by  $^1\text{H}$  NMR of the crude product. The ee was determined by HPLC with a chiralcel OD-H column and the absolute configuration was assigned by comparing HPLC elution order with known literature data.

The control reaction catalyzed by  $\text{Me}_2\text{L-Mn}$  or  $\text{H}_3\text{L-Mn}$  was performed according to the following procedure:

A 10 mL flame-dried Schlenk tube equipped with a stir bar and  $\text{Me}_2\text{L-Mn}$  or  $\text{H}_3\text{L-Mn}$  (6 mol% catalyst based on Mn) was added followed by addition of sulfides (0.1 mmol). The mixture was added with DCE (0.5 mL) and stirred for 1 h, then cooled to  $-30\text{ }^\circ\text{C}$ . Aqueous  $\text{H}_2\text{O}_2$  (30%, 14  $\mu\text{L}$ , 1.2 equiv.) in DCE (0.3 mL) was added dropwise to the suspension and stirred for 4 h at this temperature. Purification by column chromatography on silica gel using EtOAc and petroleum ether as an eluent gave the desired sulfoxide. The ratios of sulfoxide/sulfone were determined by  $^1\text{H}$  NMR of the crude product. The ee was determined by HPLC with a chiralcel OD-H column and the absolute configuration was assigned by comparing HPLC elution order with known literature data.

The homogeneous control reaction catalyzed by Me<sub>2</sub>L or H<sub>3</sub>L was performed according to the following procedure:

To a flame-dried Schlenk tube was added with Me<sub>2</sub>L (0.004 mmol) or H<sub>3</sub>L (0.004 mmol) and sulfides (0.1 mmol). The mixture was added with DCE (0.5 mL) and stirred for 1 h, then cooled to -30 °C. Aqueous H<sub>2</sub>O<sub>2</sub> (30%, 14 μL, 1.2 equiv.) in DCE (0.3 mL) was added dropwise to the suspension and stirred for 4 h at this temperature. Purification by column chromatography on silica gel using EtOAc and petroleum ether as an eluent gave the desired sulfoxide. The ratios of sulfoxide/sulfone were determined by <sup>1</sup>H NMR of the crude product. The ee was determined by HPLC with a chiralcel OD-H column and the absolute configuration was assigned by comparing HPLC elution order with known literature data.

### **Hydrogenation of quinoxalines with Hantzsch esters<sup>1</sup>**

To a 10 mL flame-dried Schlenk tube was added the activated MOFs (10 mol%, catalyst based on MOF), quinoxaline (0.1 mmol) and anhydrous CHCl<sub>3</sub> (0.5 mL). The reaction mixture was stirred for 1 h and then Hantzsch Ester (60.72 mg, 2.4 equiv) was added in one portion. The resulting mixture was stirred at 60 °C for 24 h and then purified by flash chromatography using EtOAc and petroleum ether to afford the desired products. Yield was the isolated yield.

The homogeneous control reactions catalyzed by Me<sub>2</sub>L or H<sub>3</sub>L were performed according to the following procedure:

To a 10 mL flame-dried Schlenk tube was added the activated Me<sub>2</sub>L or H<sub>3</sub>L (0.02 mmol), quinoxaline (0.1 mmol) and anhydrous CHCl<sub>3</sub> (0.5 mL). The reaction mixture was stirred for 1 h and then Hantzsch Ester (60.72 mg, 2.4 equiv) was added in one portion. The resulting mixture was stirred for 24 h and then purified by flash chromatography using EtOAc and petroleum ether to afford the desired products. Yield was the isolated yield.

### **Recycling experiment**

The recycling experiments were done in the similar procedure as above mentioned using the related substrates.

For MOFs catalyzed reactions: The catalysts were separated by centrifugation, and the supernatant was collected to give yields/conversions and ee values. The recovered MOFs were washed with fresh methanol and acetone for three times, reactivated at 100 °C for 1 h and then used for the next runs directly.

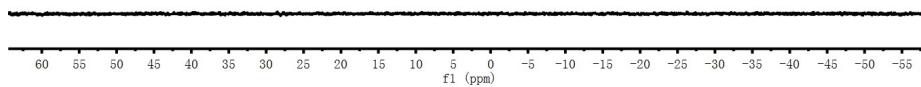

**Supplementary Figure 1.  $^{31}\text{P}$  NMR spectra of the supernatant of the reaction catalyzed by 1-Cr**

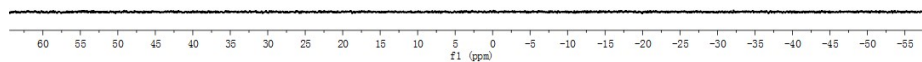

**Supplementary Figure 2.  $^{31}\text{P}$  NMR spectra of the supernatant of the reaction catalyzed by 1-Cr**



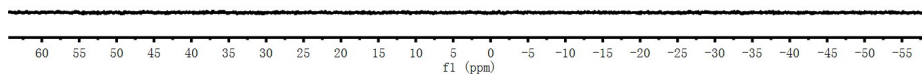

**Supplementary Figure 3.  $^{31}\text{P}$  NMR spectra of the supernatant of the reaction catalyzed by 1-Mg**

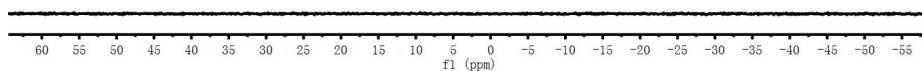

**Supplementary Figure 4.  $^{31}\text{P}$  NMR spectra of the supernatant of the reaction catalyzed by 1-Mn**

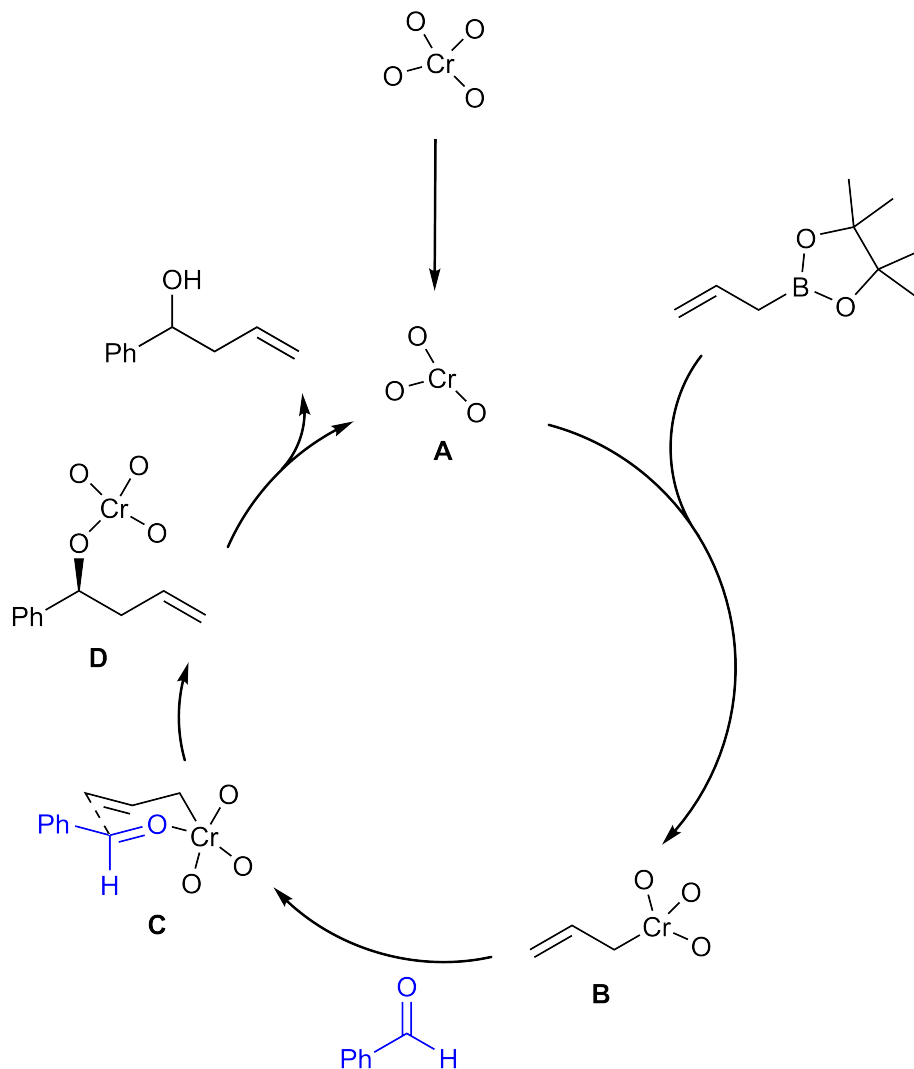

**Supplementary Figure 5. Proposed a possible catalytic cycle for Allylboration of aldehydes** (Cr was the terminal Cr in the linear trimeric Cr<sub>3</sub> unit) Based on the obtained results and reported literature<sup>2-4</sup>, the catalytic cycle involves the following steps: Firstly, the one water or methanol molecule coordinated to the terminal Cr was removed to form coordinatively unsaturated metal center **A**. Secondly, exchange of ally active specie from boron to Cr to form intermediate **B**. Thirdly, reacting with aldehyde through six-membered transition state **C** in a  $\gamma$ -addition fashion to give **D**. Lastly, hydrolysis of **D** to get homoallylic alcohol.

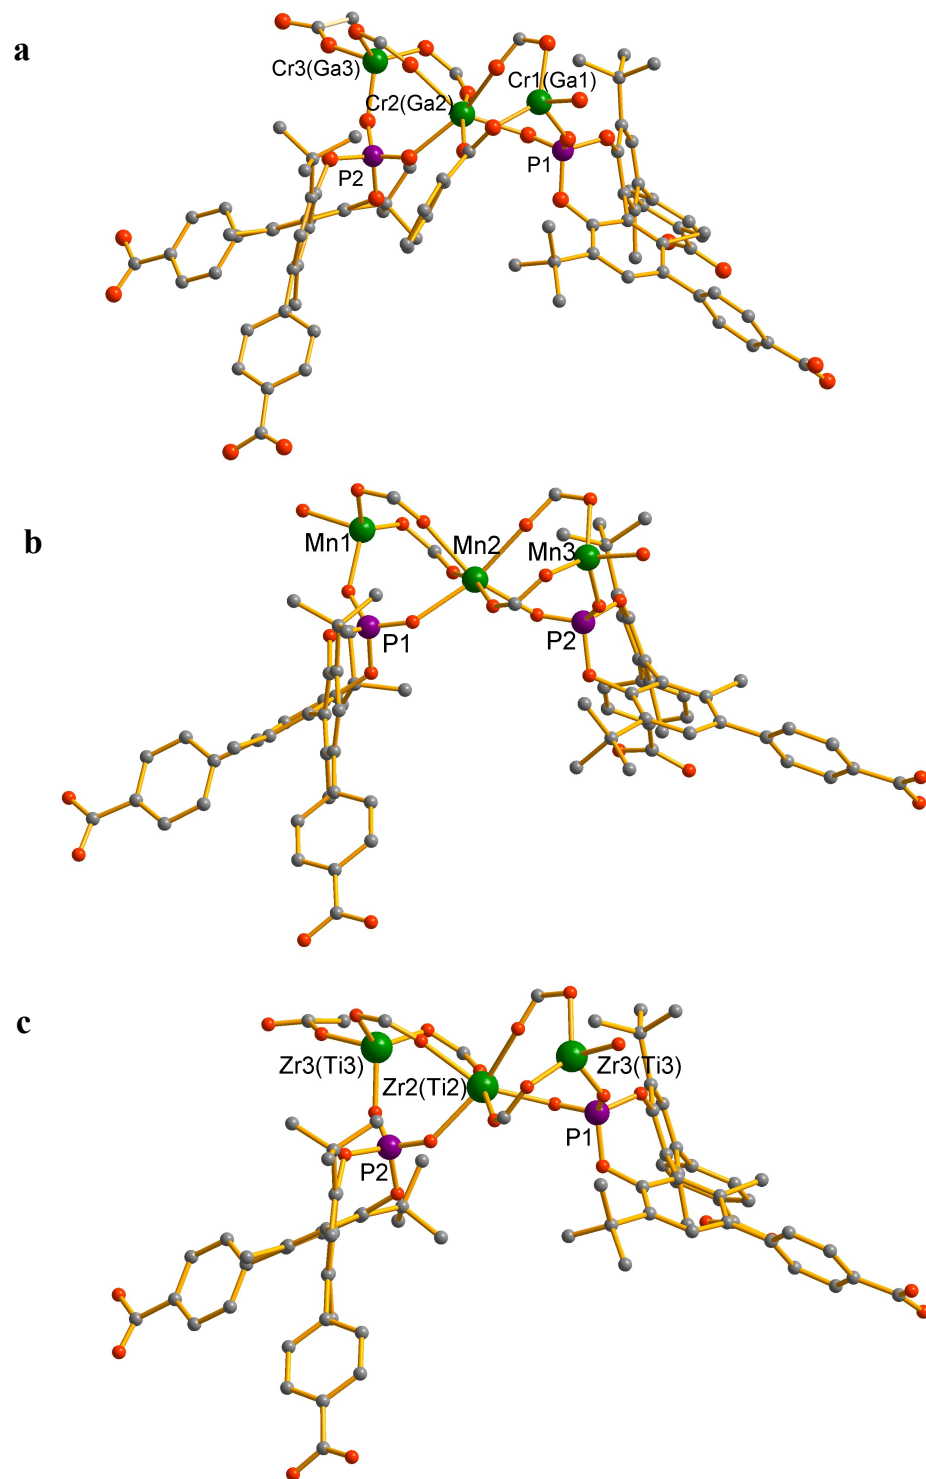

**Supplementary Figure 6. The coordination environments of trimetallic clusters in MOFs 1-M: a, 1-Cr. b, 1-Mn. c, 1-Zr. (green, Metal; purple, P; red, O; gray, C).**

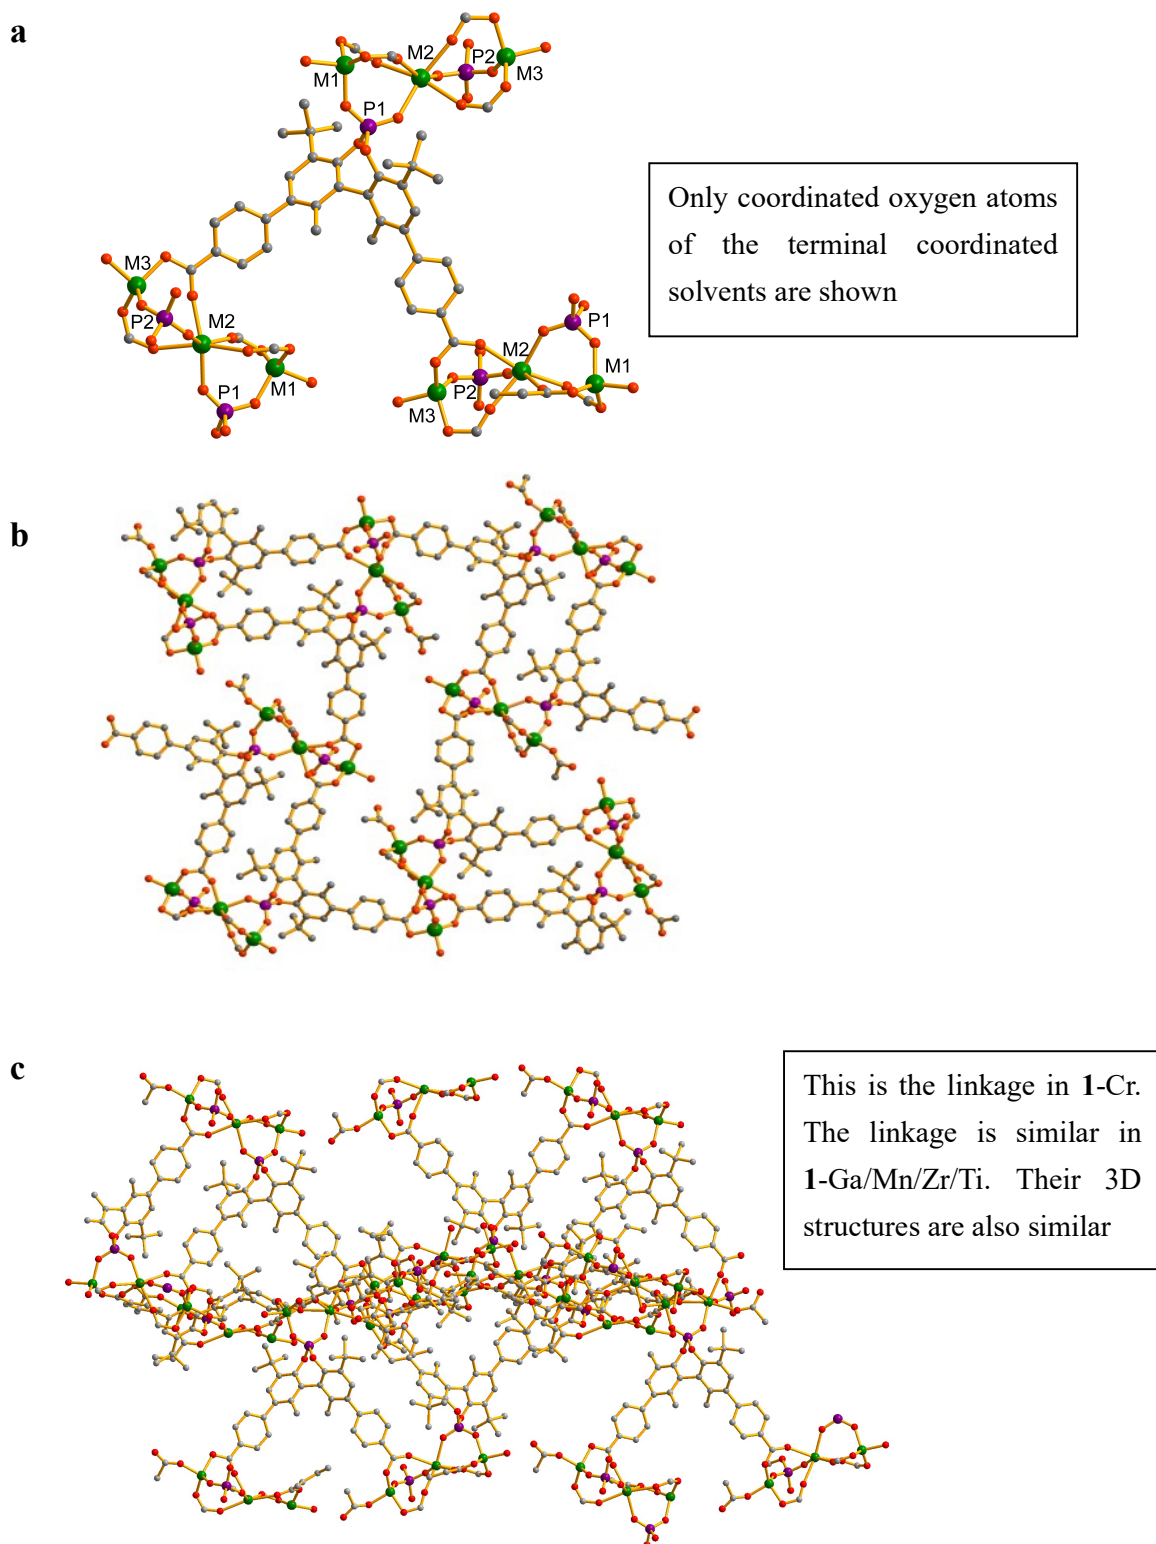

**Supplementary Figure 7. a**, The coordination mode of **L**. **b**, A view of 2D Sheet. **c**, Linking 2D sheet to 3D structure by **L** in **1-Cr/Ga/Mn/Zr/Ti**.

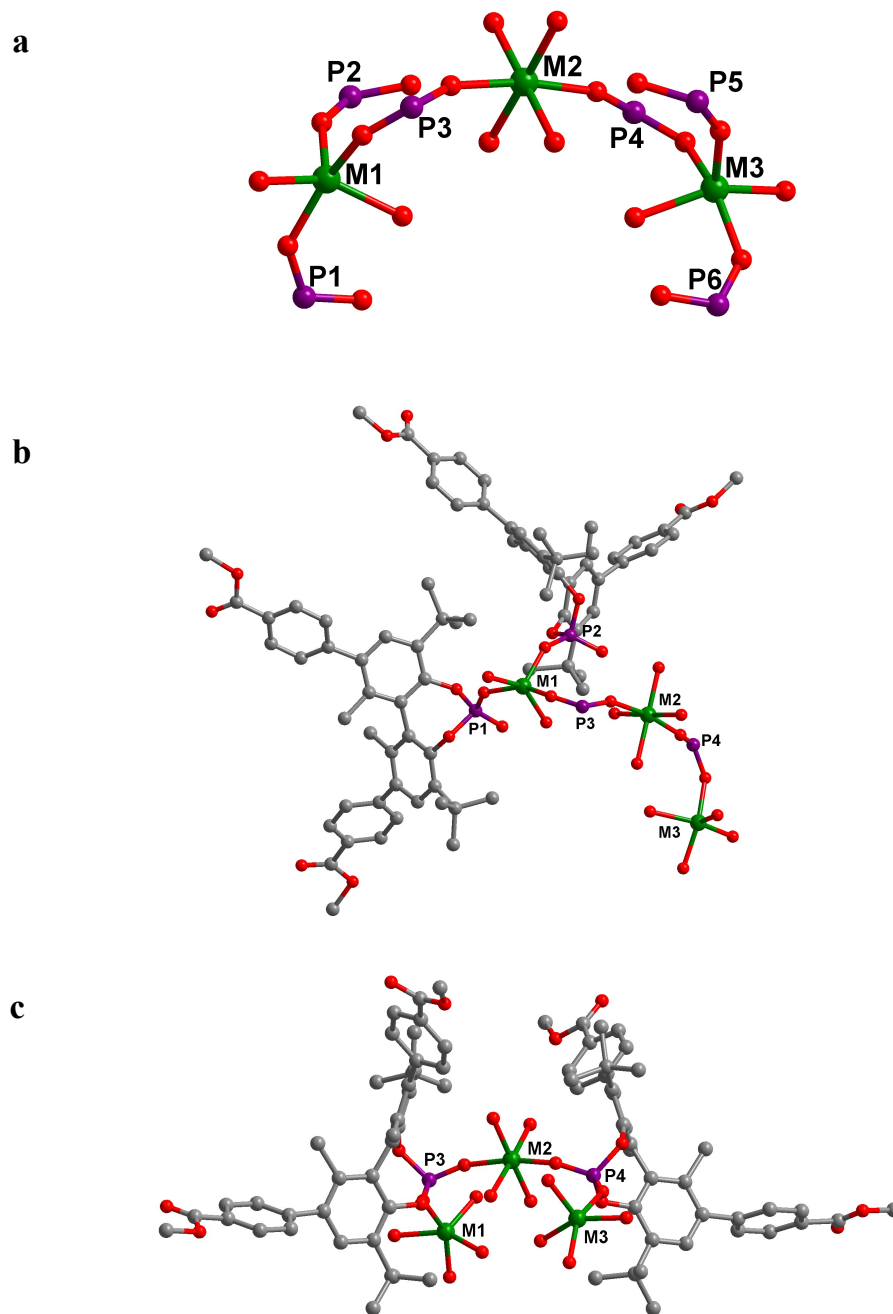

**Supplementary Figure 8.** **a**, The coordination mode of trimeric  $M_3$  unit of homogeneous catalyst. **b**, The coordination mode of terminal M. **c**, The coordination mode of central M.

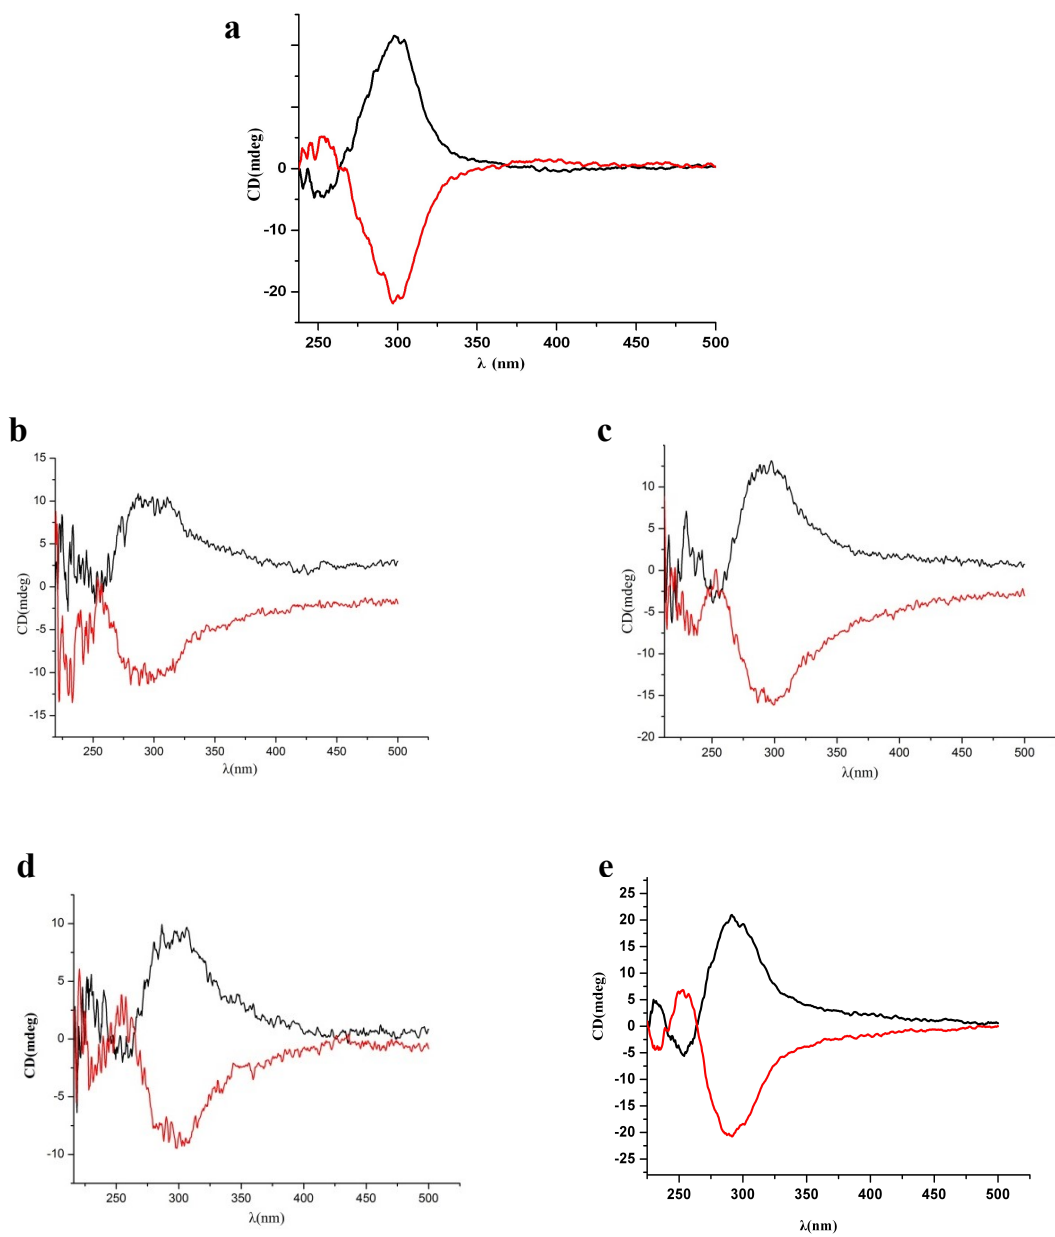

**Supplementary Figure 9. Solid-state CD spectra: a, Ligand  $H_3L$ . b, 1-Cr. c, 1-Mg. d, 1-Mn. e, 1-Zr.**

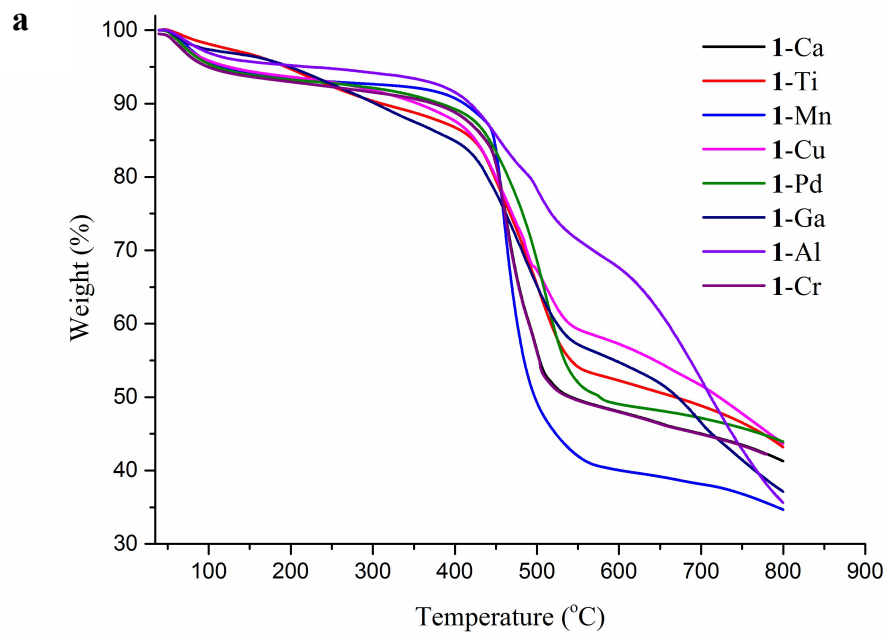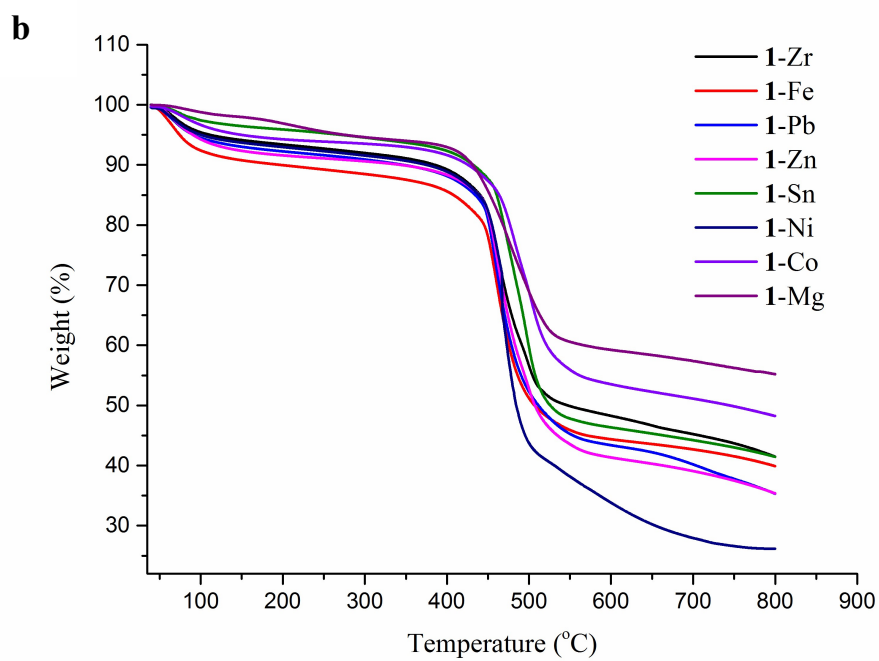

**Supplementary Figure 10. TGA curves of 1-M: a, M=Ca, Ti, Mn, Cu, Pd, Ga, Al and Cr. b, M=Zr, Fe, Pb, Zn, Sn, Ni, Co and Mg.**

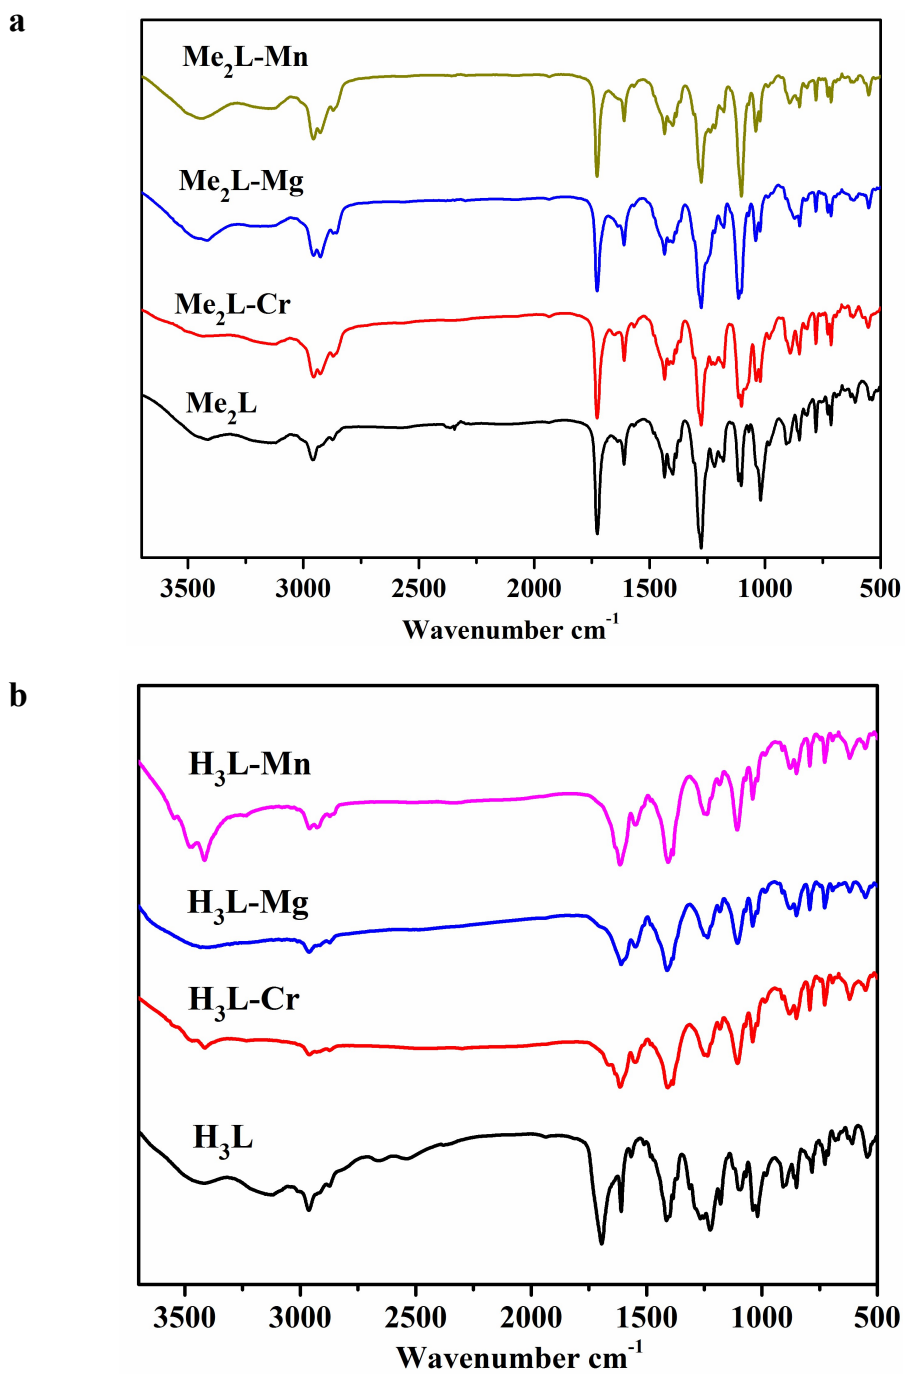

Supplementary Figure 11. FT-IR spectra of metal phosphates: a, Me<sub>2</sub>L-M. b, H<sub>3</sub>L-M.



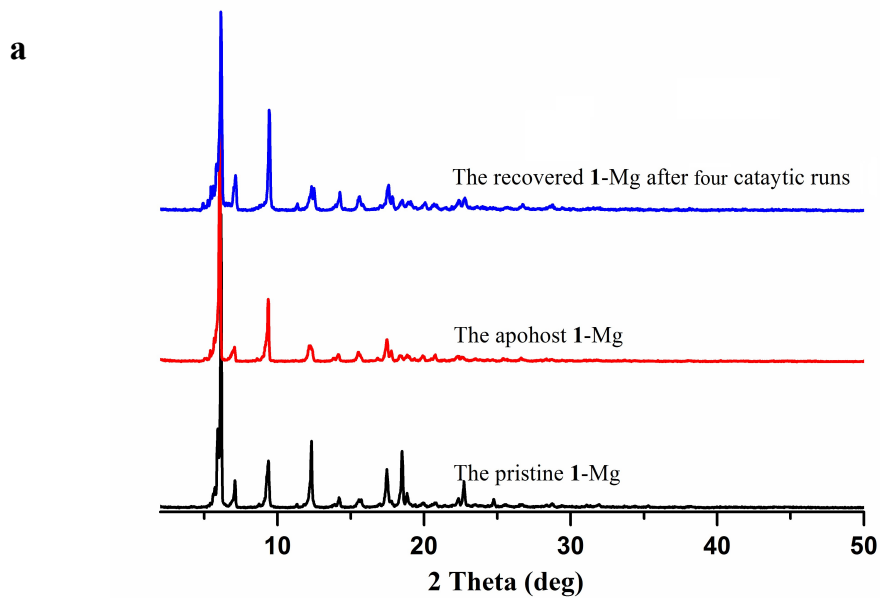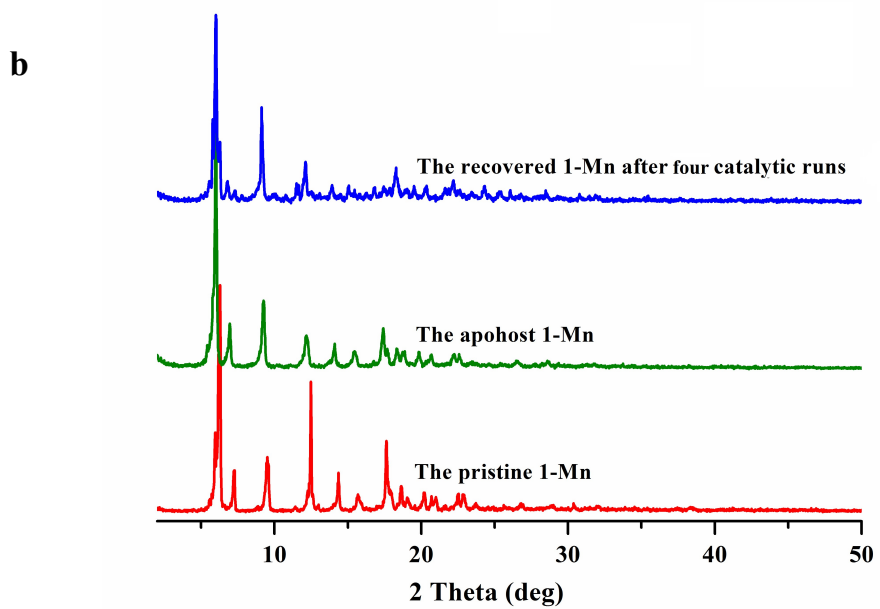

Supplementary Figure 12. PXRD of the apohost and recovered 1-M after four catalytic runs: a, 1-Mg. b, 1-Mn.

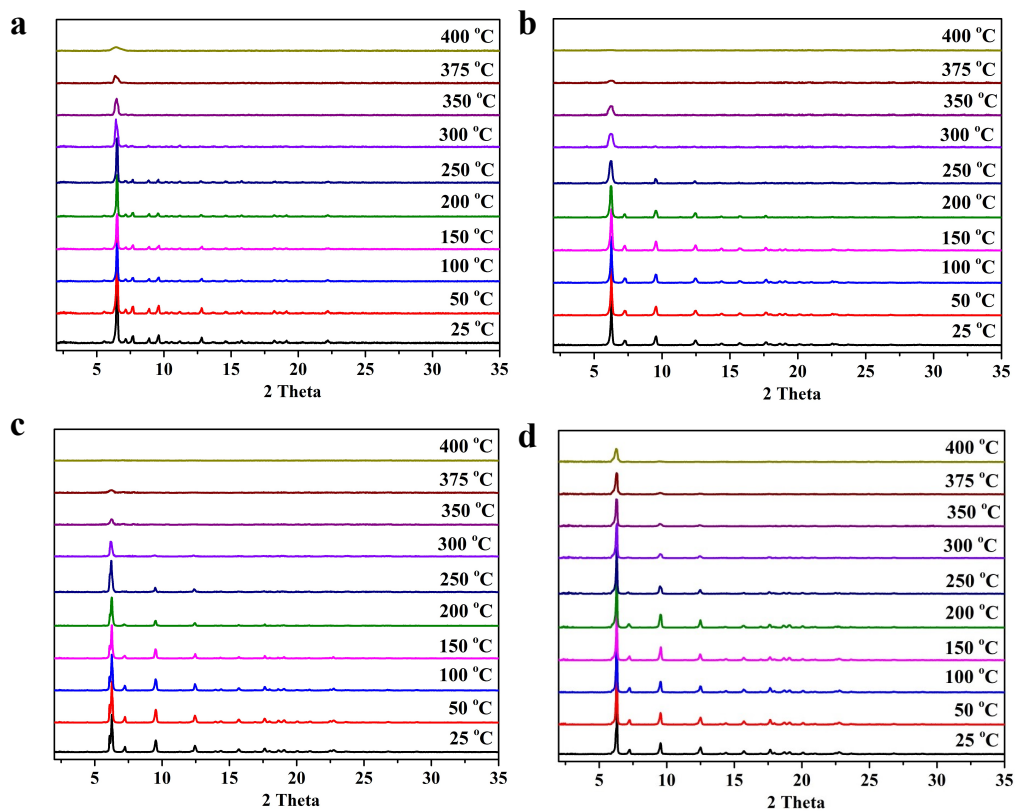

Supplementary Figure 13. Variable temperature PXRD of 1-M: a, 1-Cr. b, 1-Mn. c, 1-Mg. d, 1-Zr

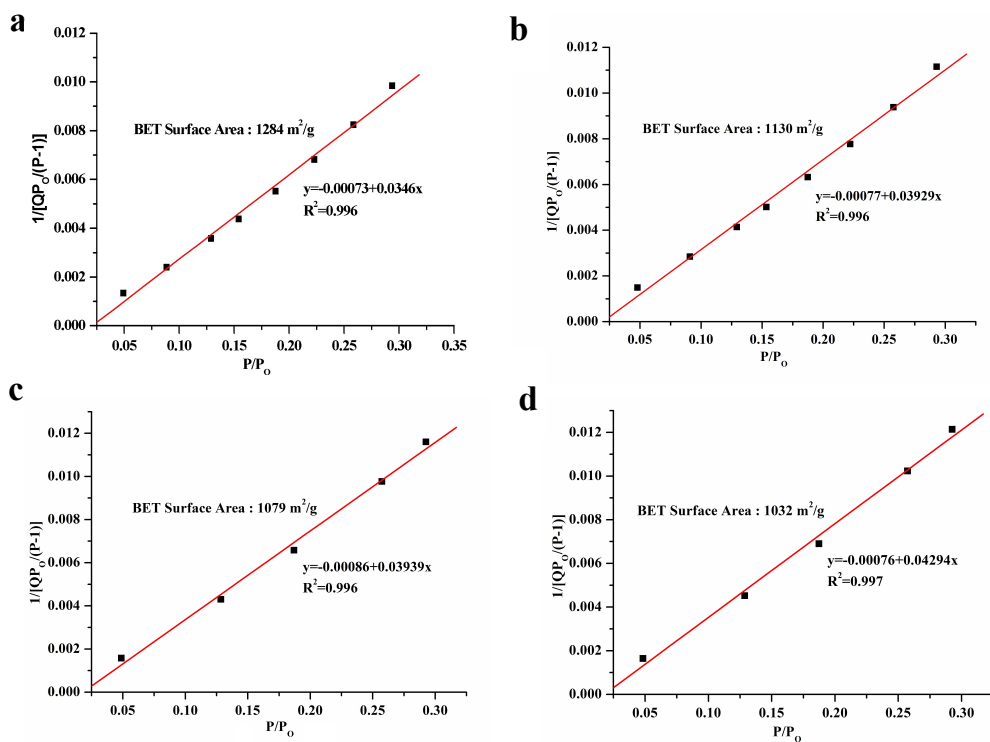

**Supplementary Figure 14. BET plots of 1-Cr: a, The pristine sample. b, @boiling water after 7 days. c, @pH=4 solution after 7 days. d, @pH=9 solution after 7 days.**

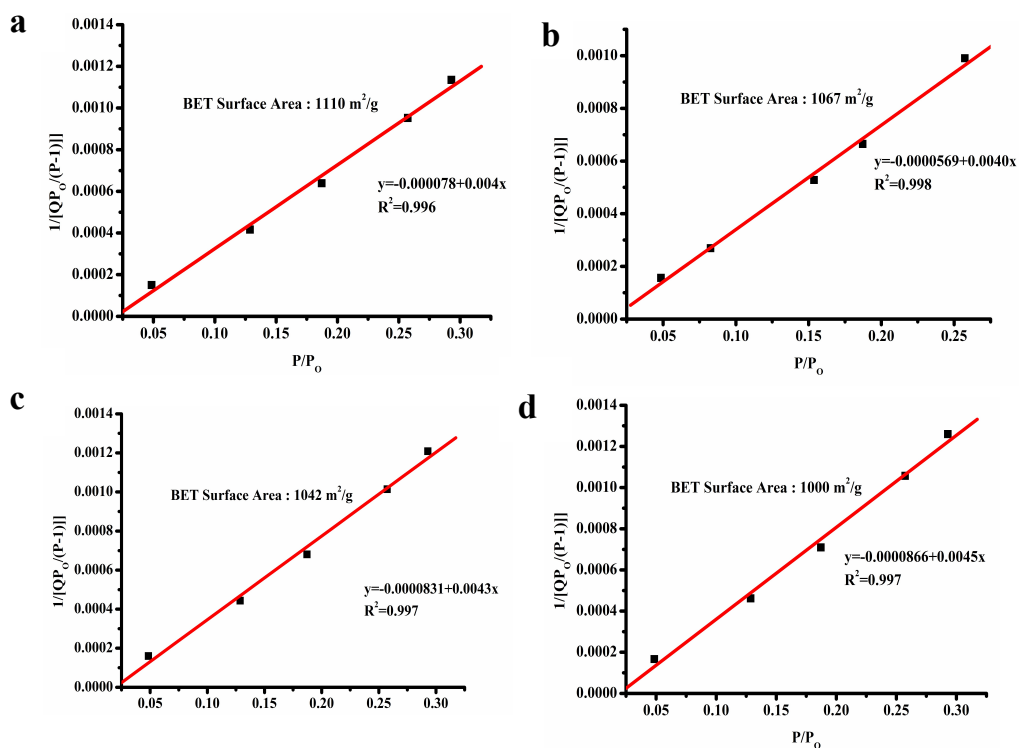

**Supplementary Figure 15. BET plots of 1-Mg: a, The pristine sample. b, @boiling water after 7 days. c, @pH=4 solution after 7 days. d, @pH=9 solution after 7 days.**

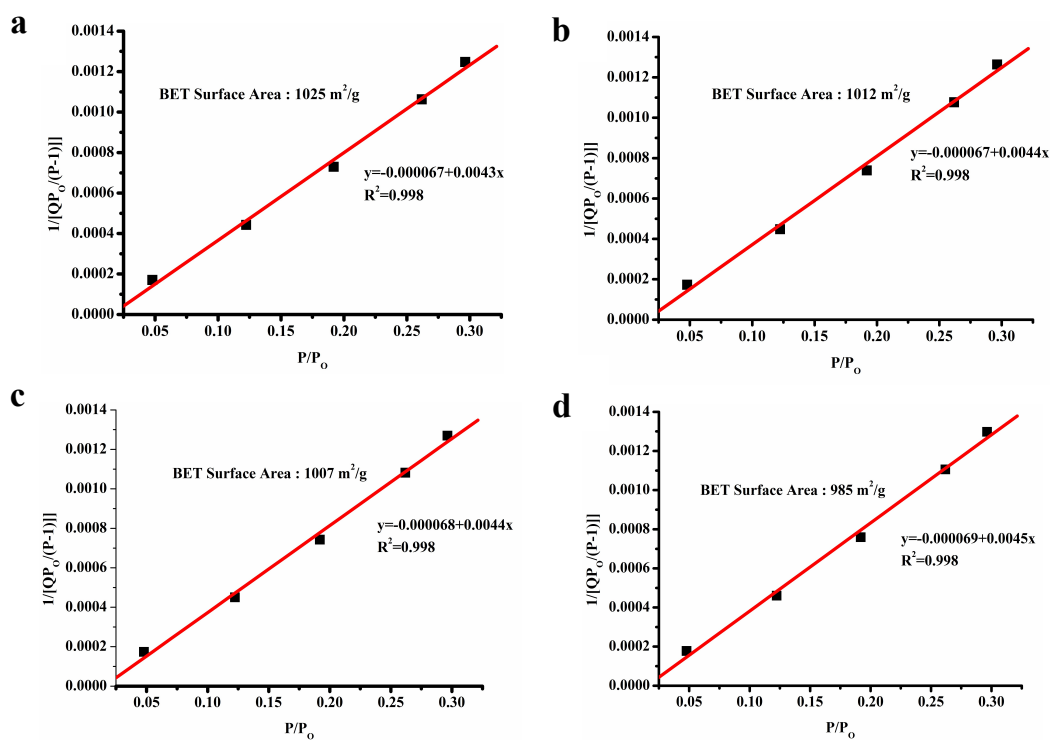

**Supplementary Figure 16. BET plots of 1-Mn: a,** The pristine sample. **b,** @boiling water after 7 days. **c,** @pH=4 solution after 7 days. **d,** @pH=9 solution after 7 days.

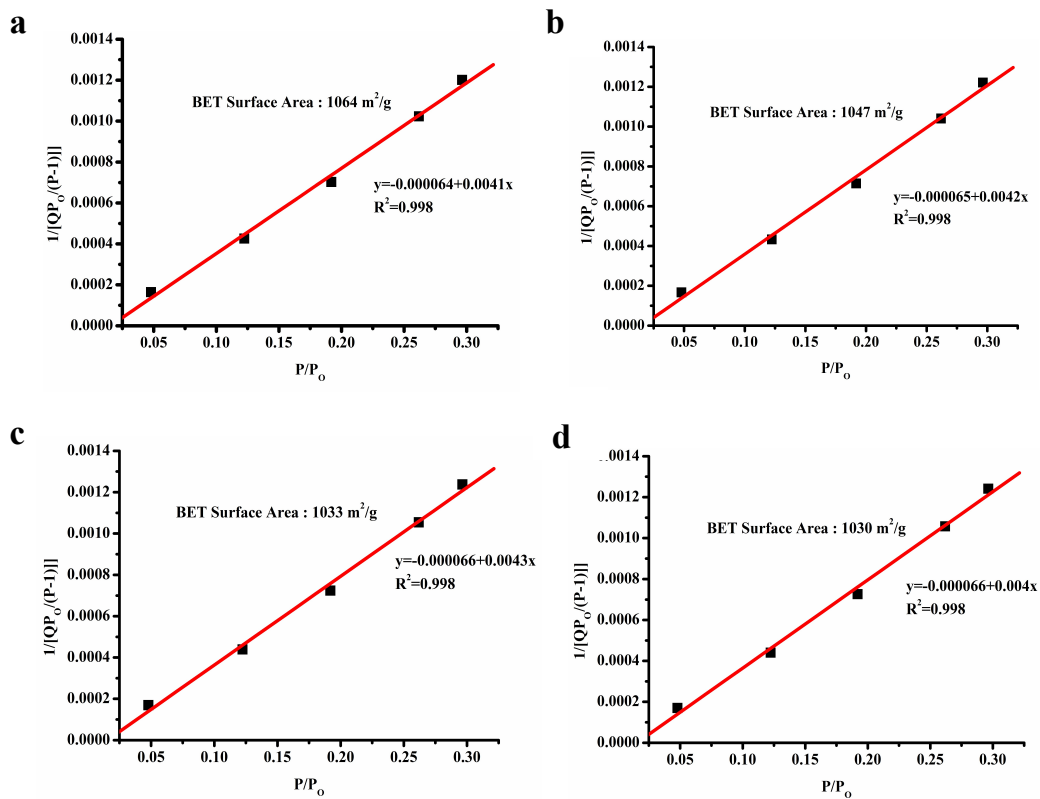

**Supplementary Figure 17. BET plots of 1-Zr: a, The pristine sample. b, @boiling water after 7 days. c, @pH=4 solution after 7 days. d, @pH=9 solution after 7 days.**

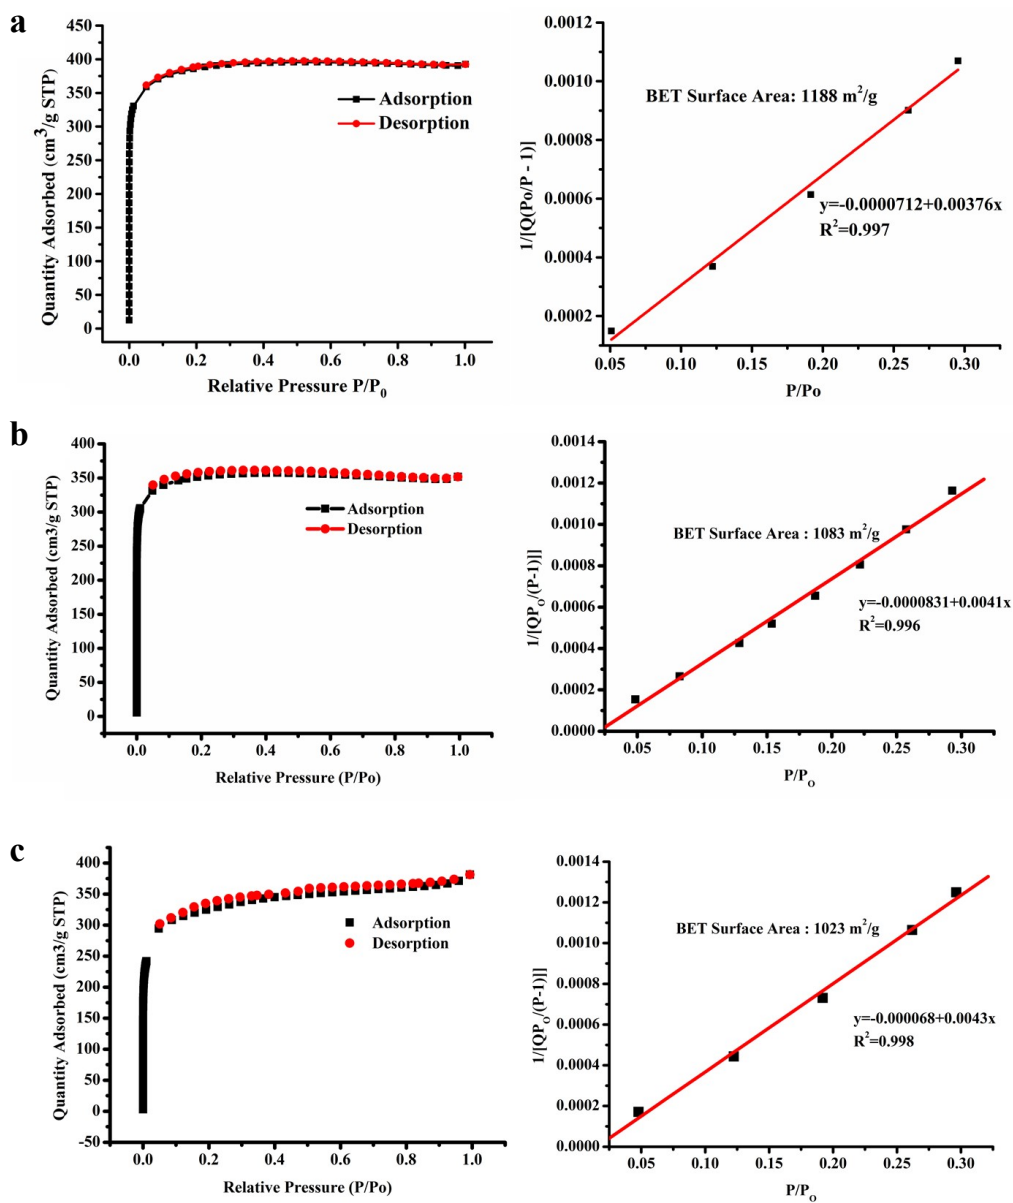

**Supplementary Figure 18. N<sub>2</sub> adsorption isotherms (left) and BET plots (right): a, Pristine 1-Cr. Recovered 1-M after four catalytic runs b, 1-Mg. c, 1-Mn.**

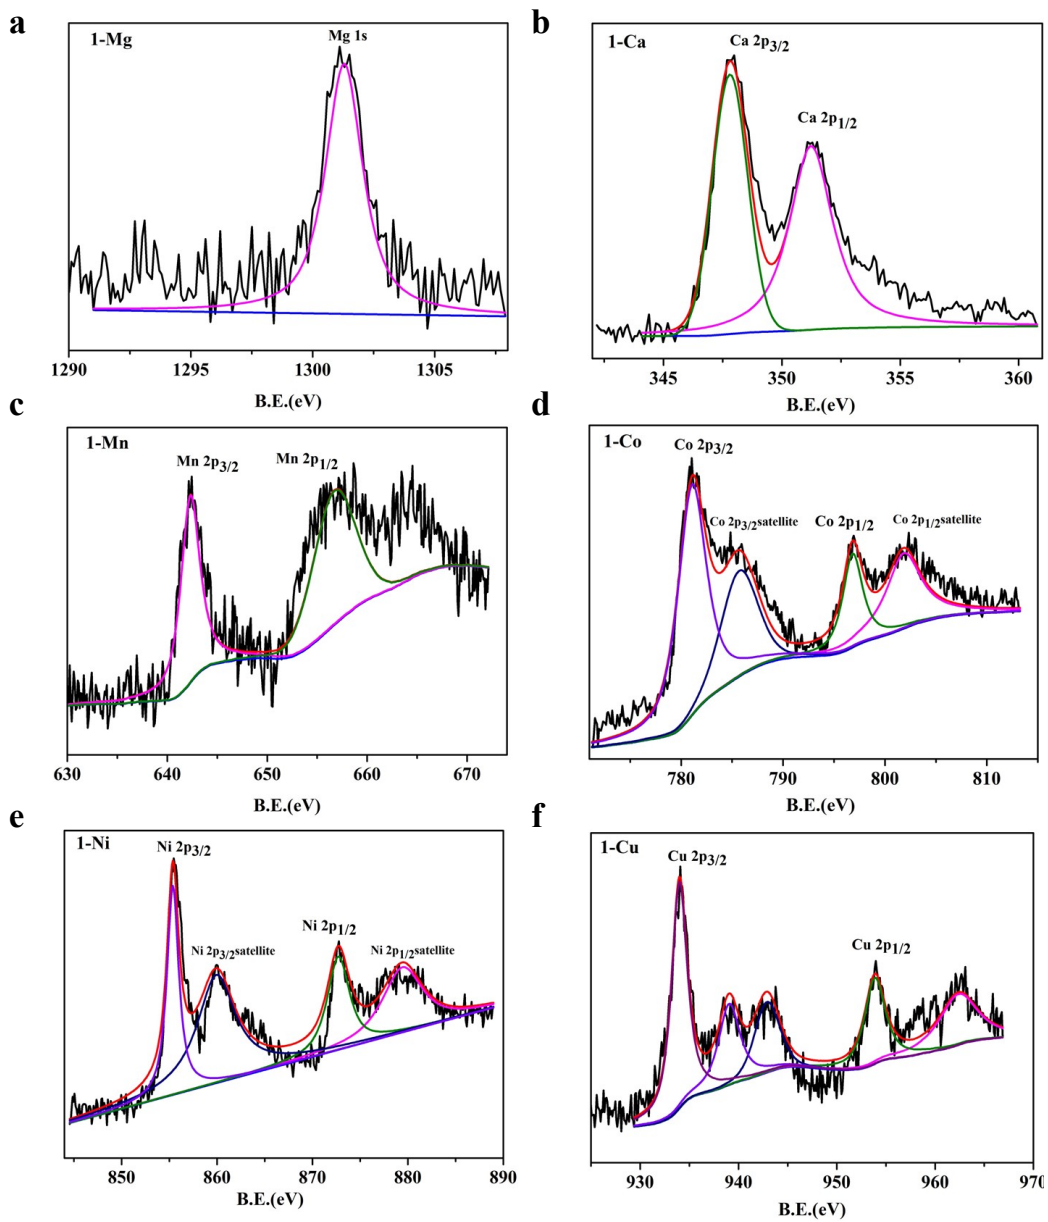

Supplementary Figure 19. XPS spectra of 1-M: a, 1-Mg. b, 1-Ca. c, 1-Mn. d, 1-Co. e, 1-Ni. f, 1-Cu.



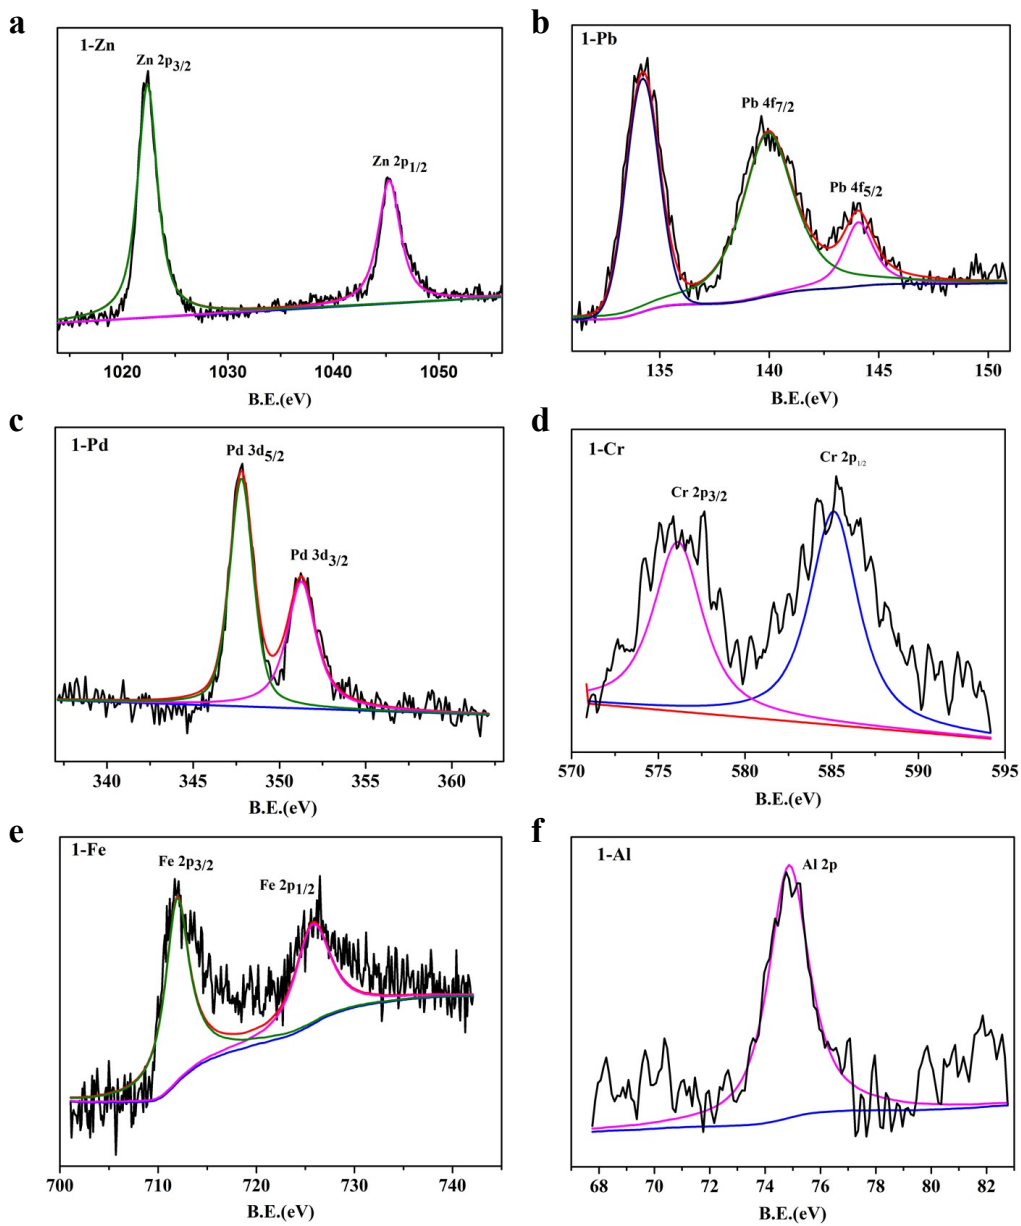

Supplementary Figure 20. XPS spectra of 1-M: a, 1-Zn. b, 1-Pb. c, 1-Pd. d, 1-Cr. e, 1-Fe. f, 1-Al.

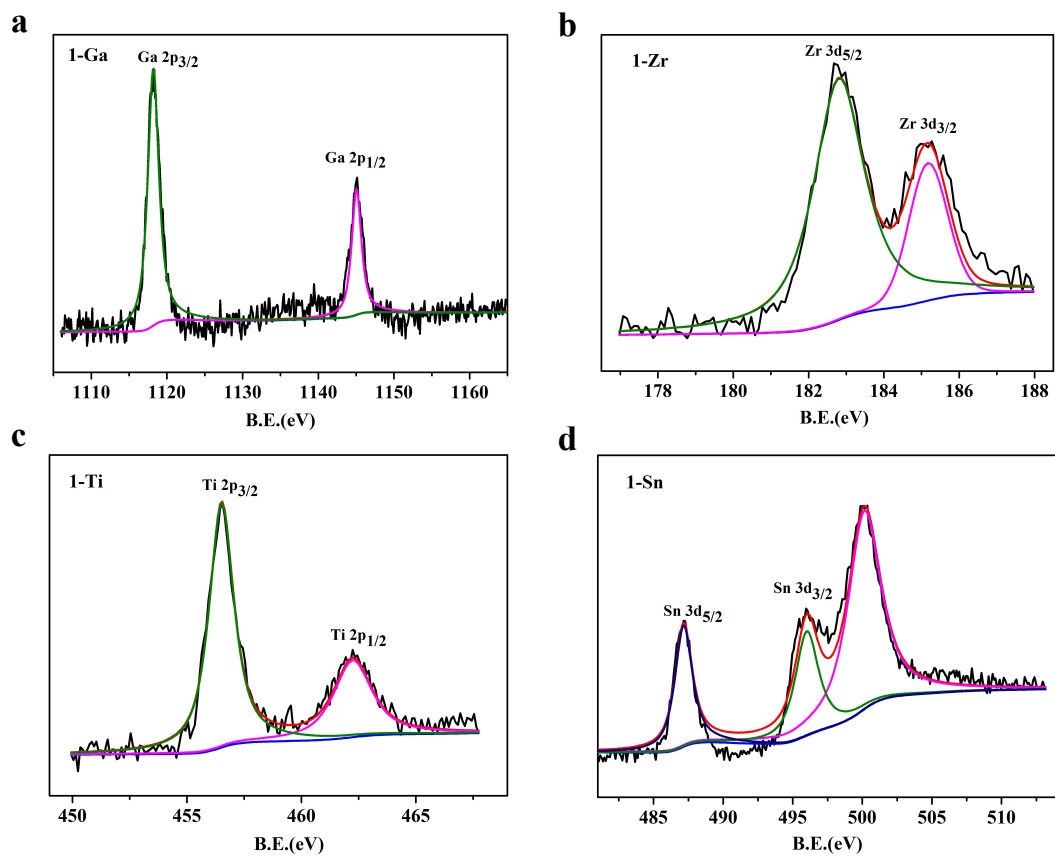

Supplementary Figure 21. XPS spectra of 1-M: a, 1-Ga. b, 1-Zr. c, 1-Ti. d, 1-Sn.

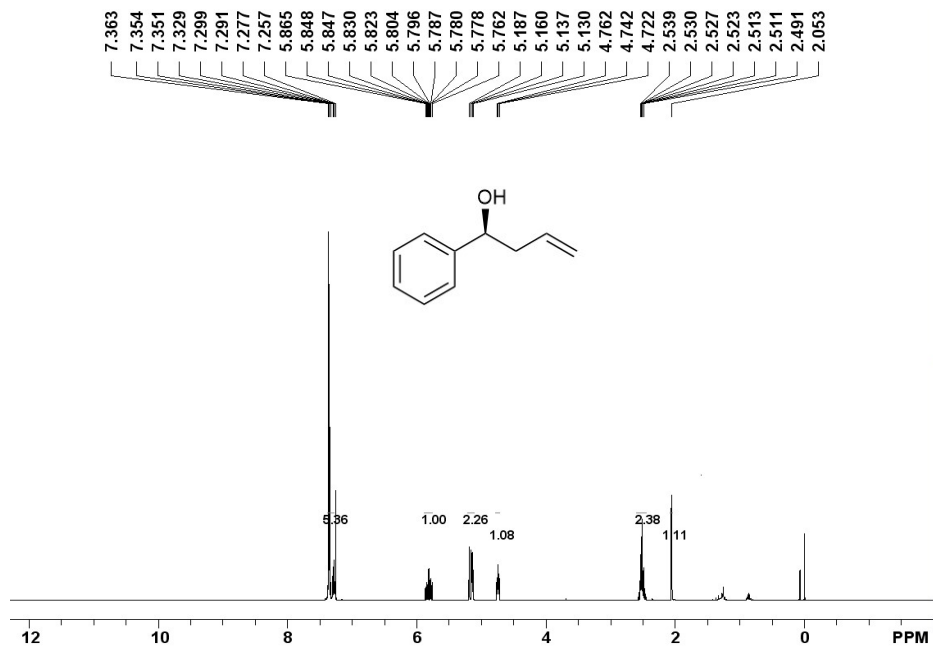

Supplementary Figure 22.  $^1\text{H}$  NMR spectra for (*S*)-1-phenyl-but-3-en-1-ol

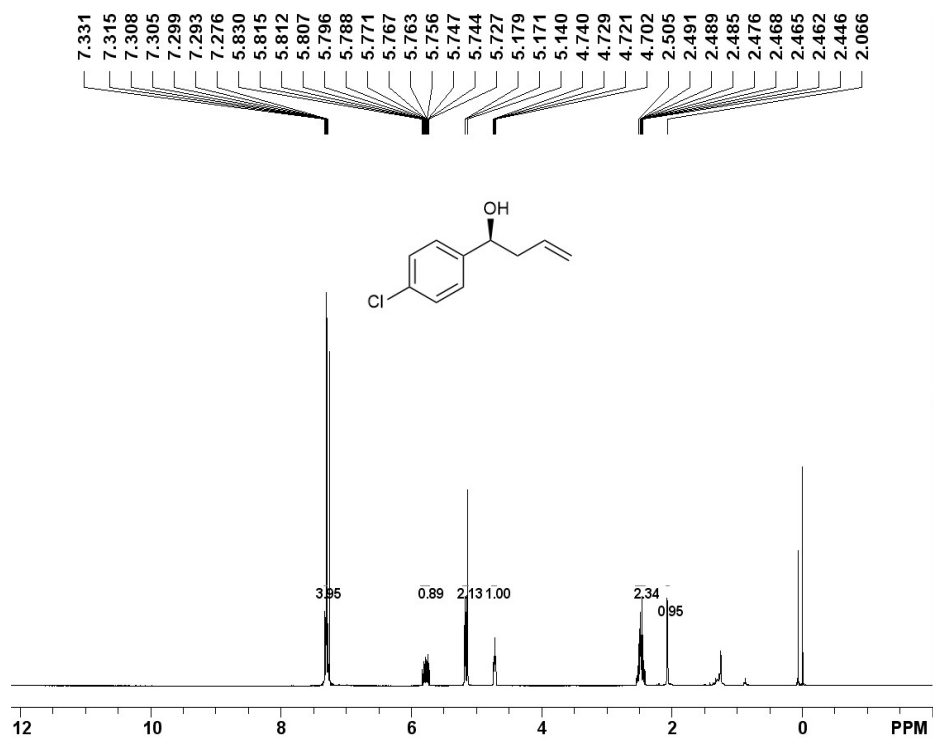

Supplementary Figure 23.  $^1\text{H}$  NMR spectra for (*S*)-1-(4-chloro-phenyl)-but-3-en-1-ol

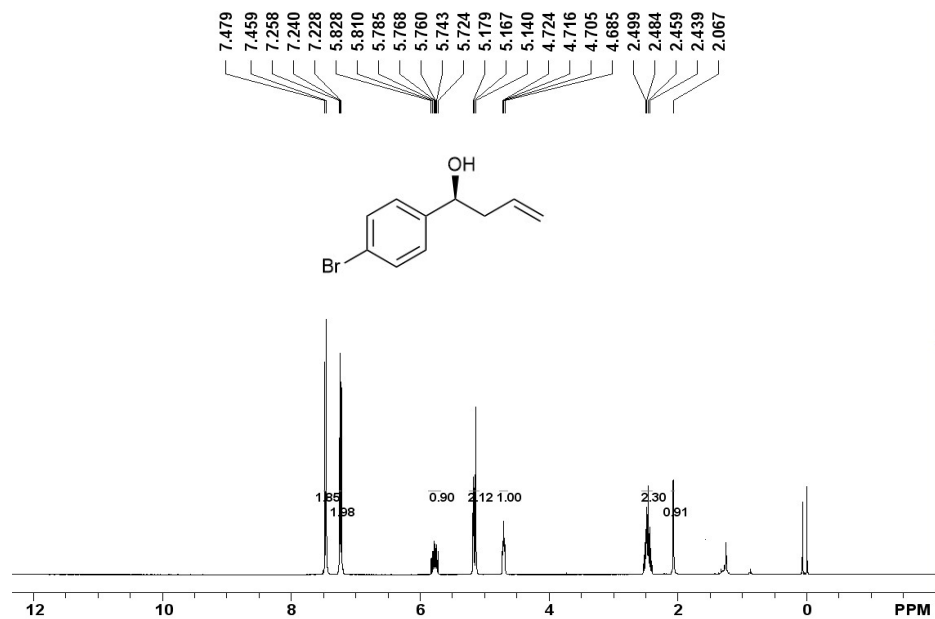

Supplementary Figure 24.  $^1\text{H}$  NMR spectra for (*S*)-1-(4-bromo-phenyl)-but-3-en-1-ol

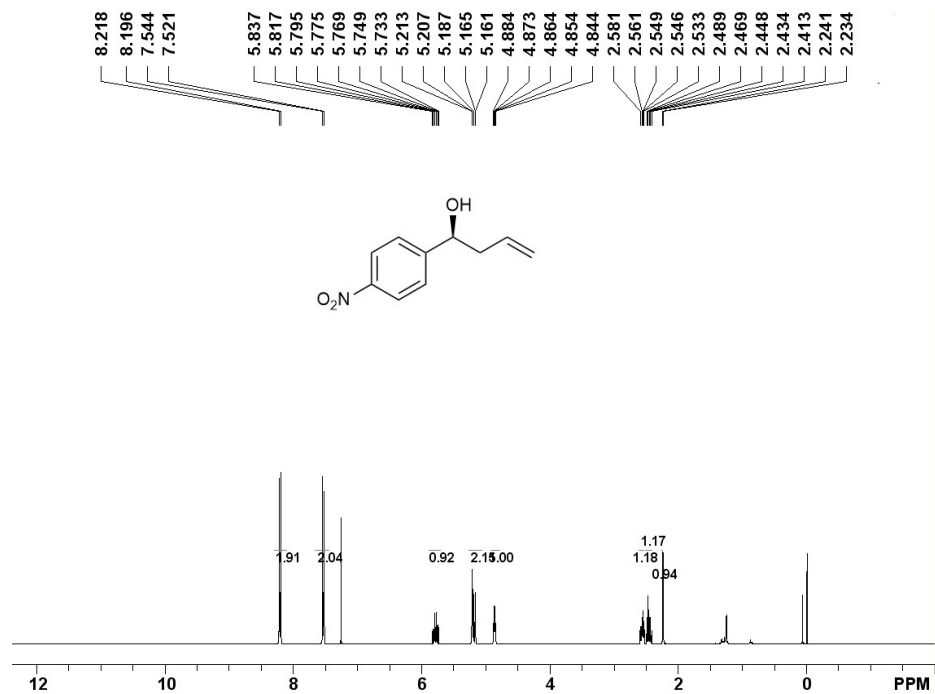

Supplementary Figure 25.  $^1\text{H}$  NMR spectra for (*S*)-1-(4-nitro-phenyl)-but-3-en-1-ol

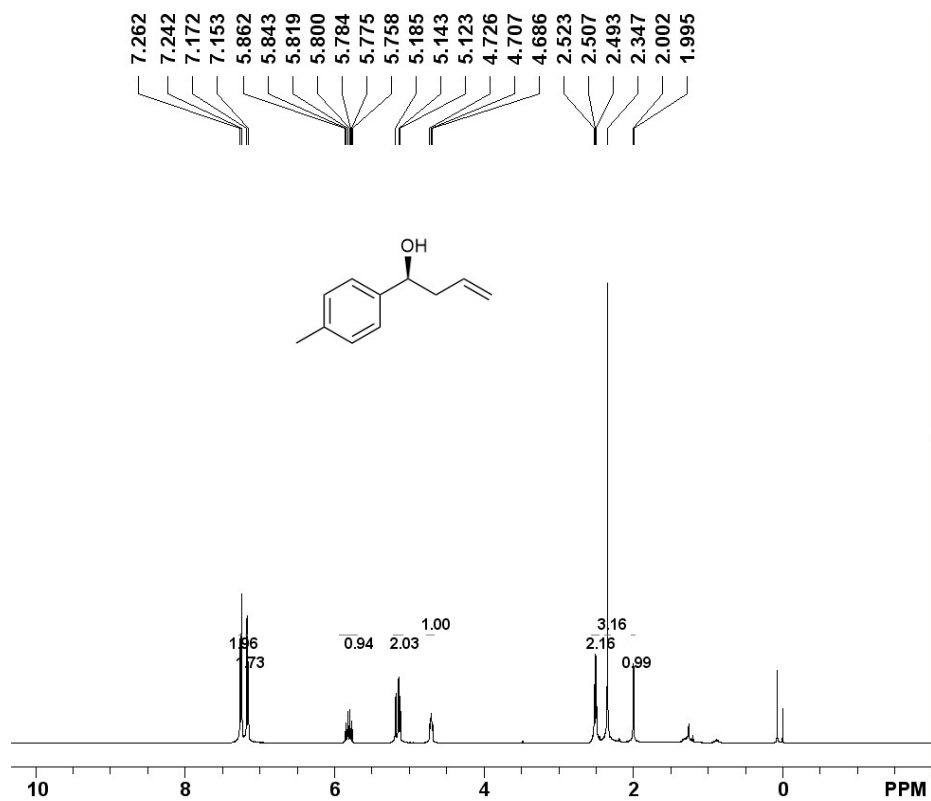

Supplementary Figure 26. <sup>1</sup>H NMR spectra for (*S*)-1-(4-Methyl-phenyl)-but-3-en-1-ol

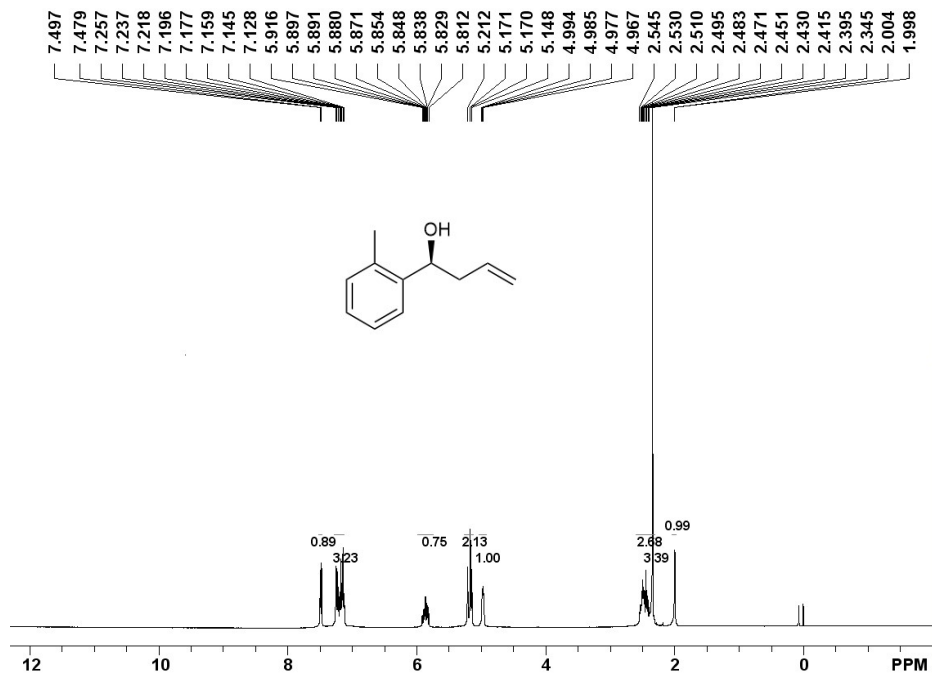

Supplementary Figure 27.  $^1\text{H}$  NMR spectra for (*S*)-1-(*o*-methyl-phenyl)-but-3-en-1-ol

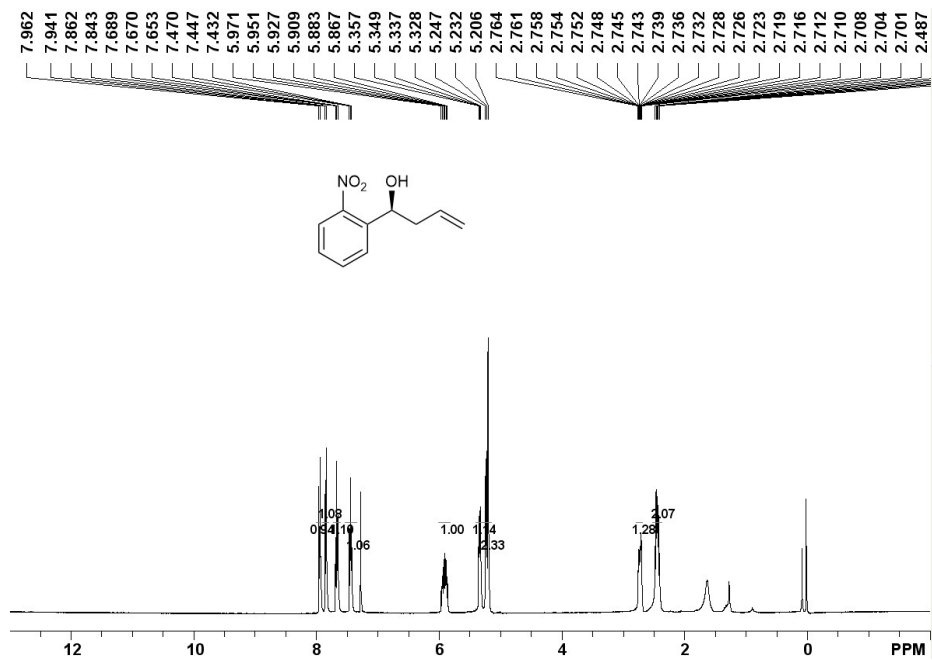

Supplementary Figure 28.  $^1\text{H}$  NMR spectra for (*S*)-1-(2-Nitro-phenyl)-but-3-en-1-ol

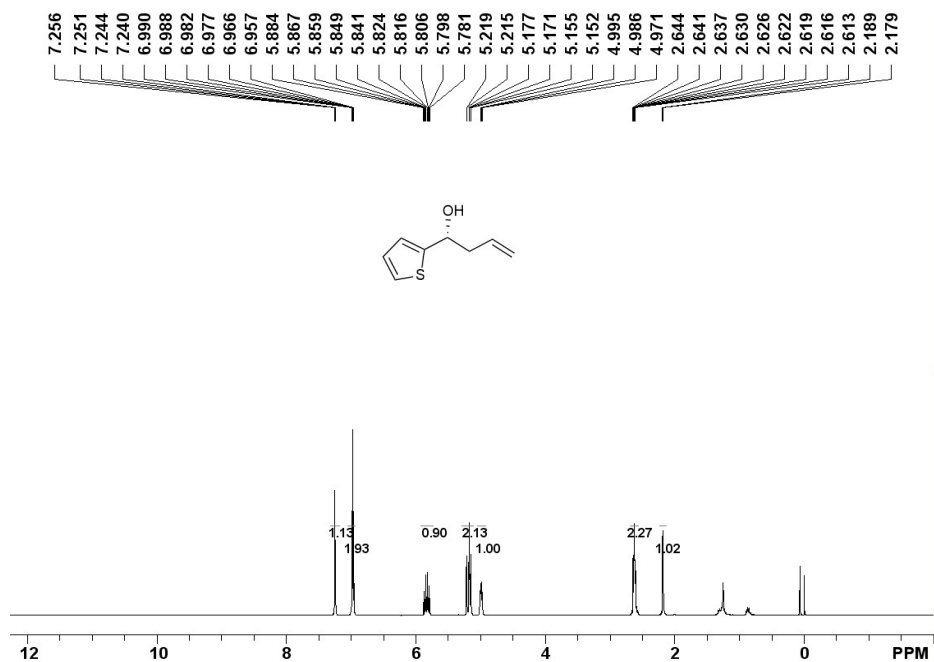

Supplementary Figure 29. <sup>1</sup>H NMR spectra for (*R*)-1-Thiophen-2-yl-but-3-en-1-ol

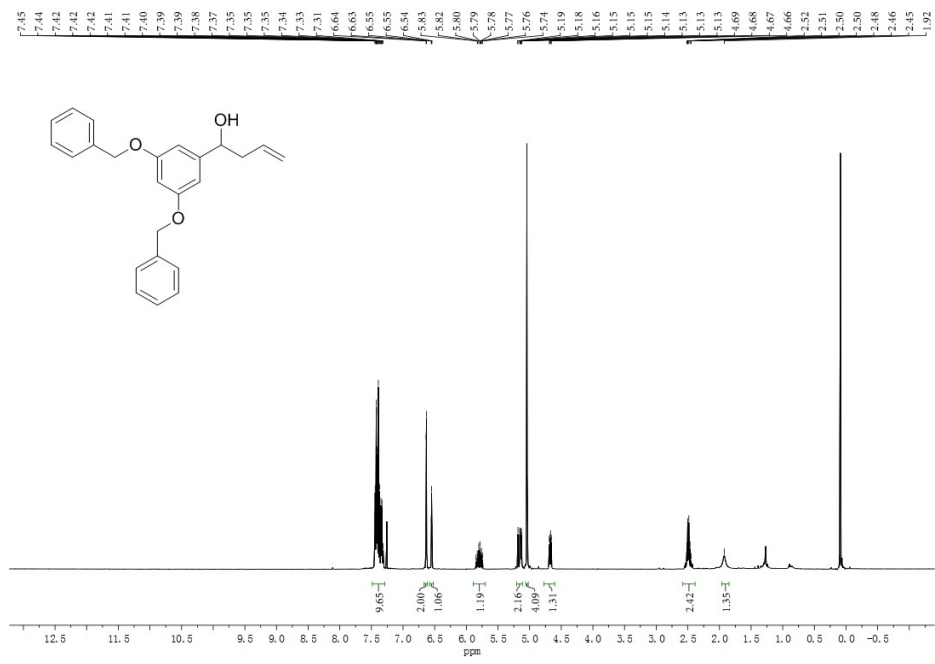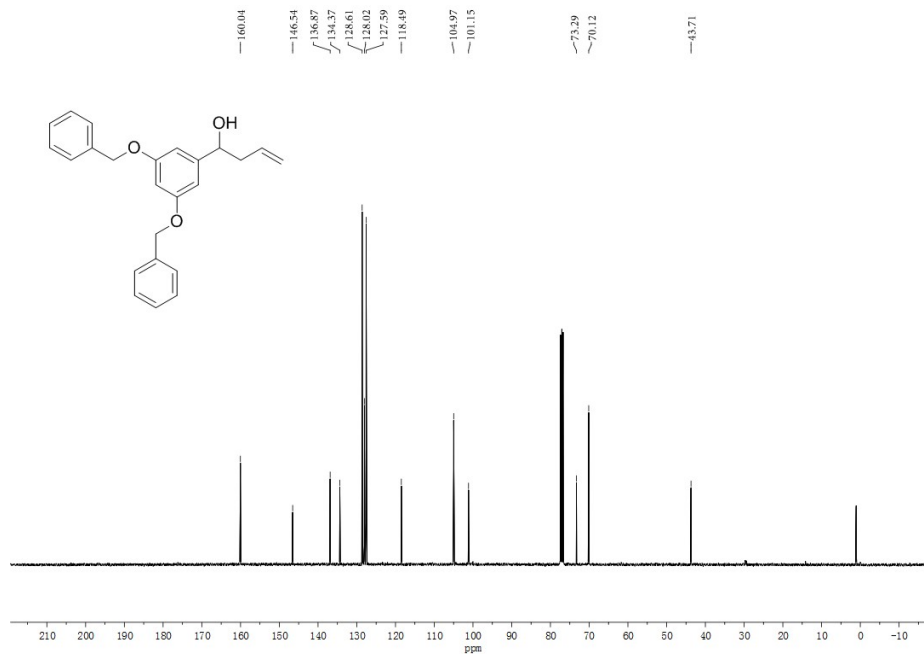

Supplementary Figure 30.  $^1\text{H}$  and  $^{13}\text{C}$  NMR spectra for 1-(3,5-bis(benzyloxy)phenyl)but-3-en-1-ol



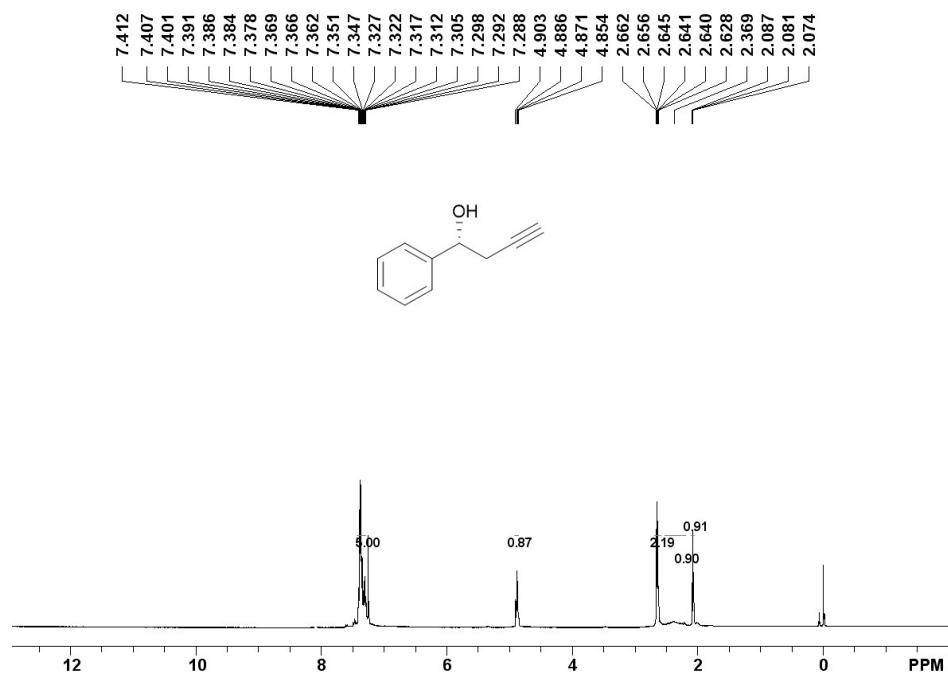

Supplementary Figure 31.  $^1\text{H}$  NMR spectra for (*R*)-1-Phenyl-but-3-yn-1-ol

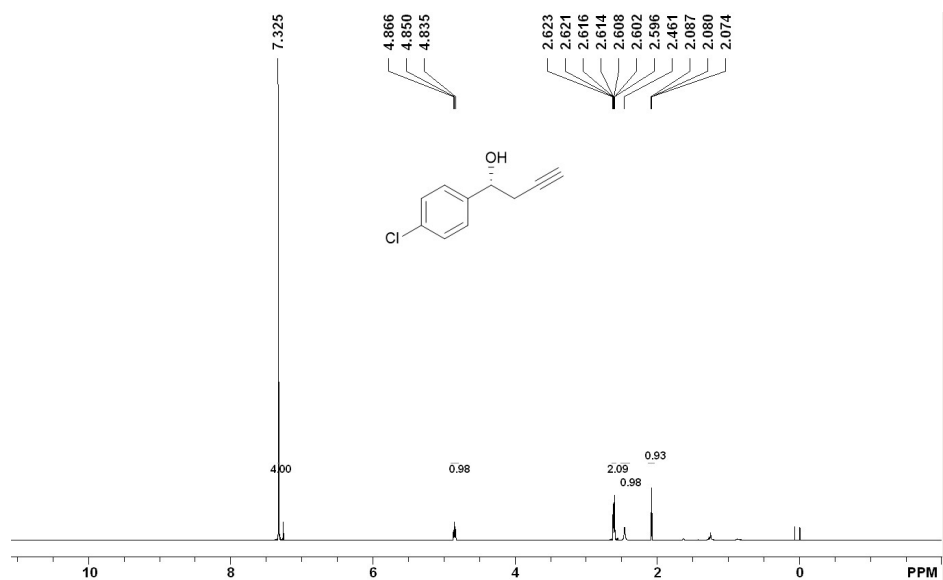

Supplementary Figure 32.  $^1\text{H}$  NMR spectra for (*R*)-1-(4-Chloro-phenyl)-but-3-yn-1-ol

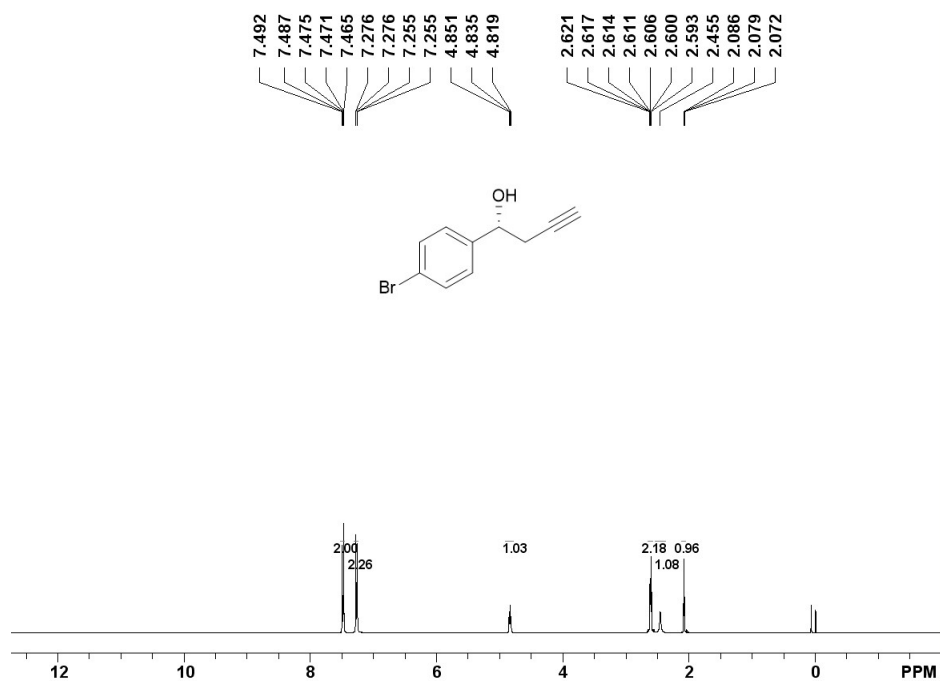

Supplementary Figure 33. <sup>1</sup>H NMR spectra for (R)-1-(4-Bromo-phenyl)-but-3-yn-1-ol

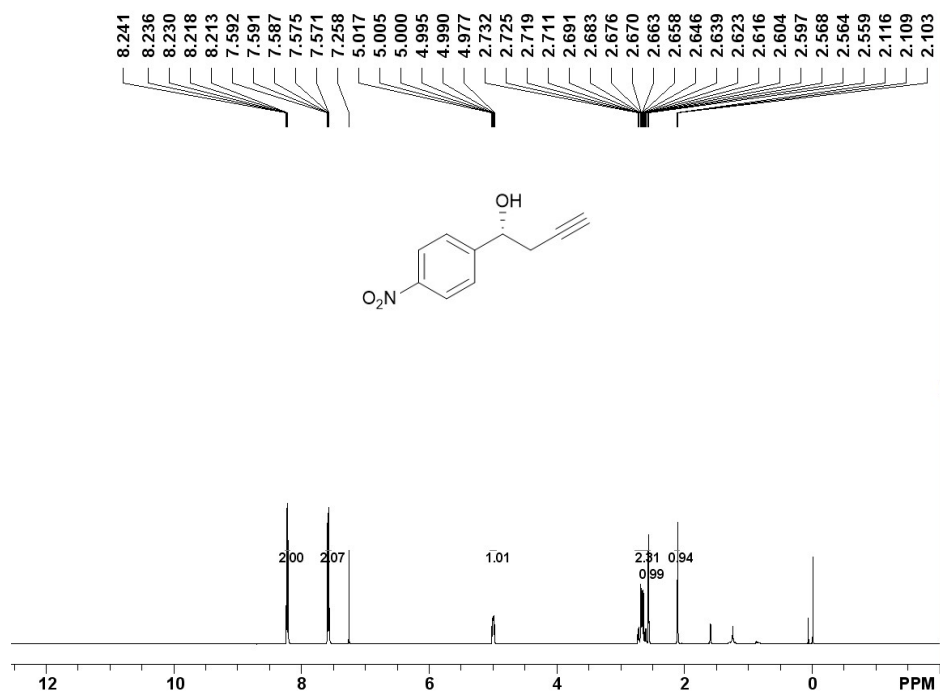

Supplementary Figure 34. <sup>1</sup>H NMR spectra for (R)-1-(4-Nitro-phenyl)-but-3-yn-1-ol

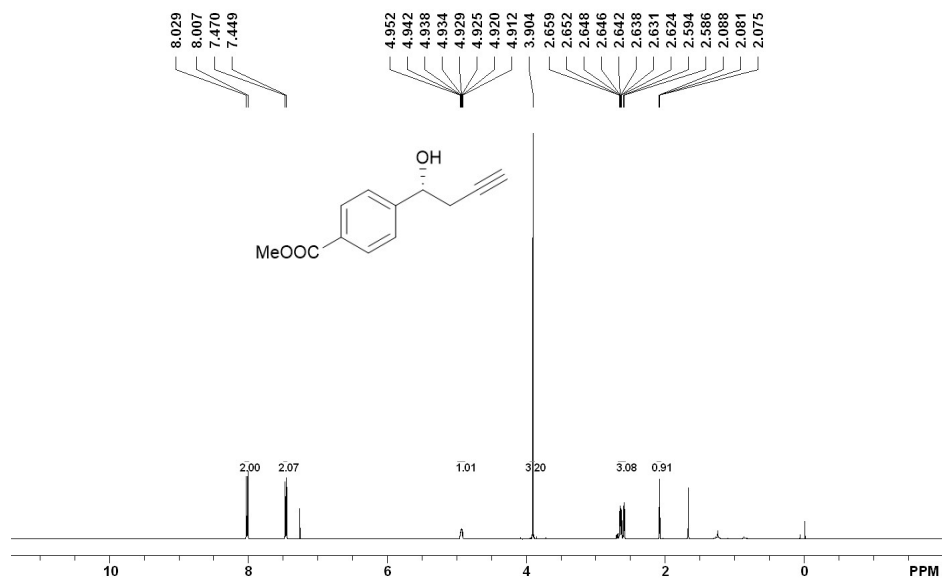

Supplementary Figure 35. <sup>1</sup>H NMR spectra for ((*R*)-Methyl 4-(1-hydroxybut-3-yn-1-yl)benzoate

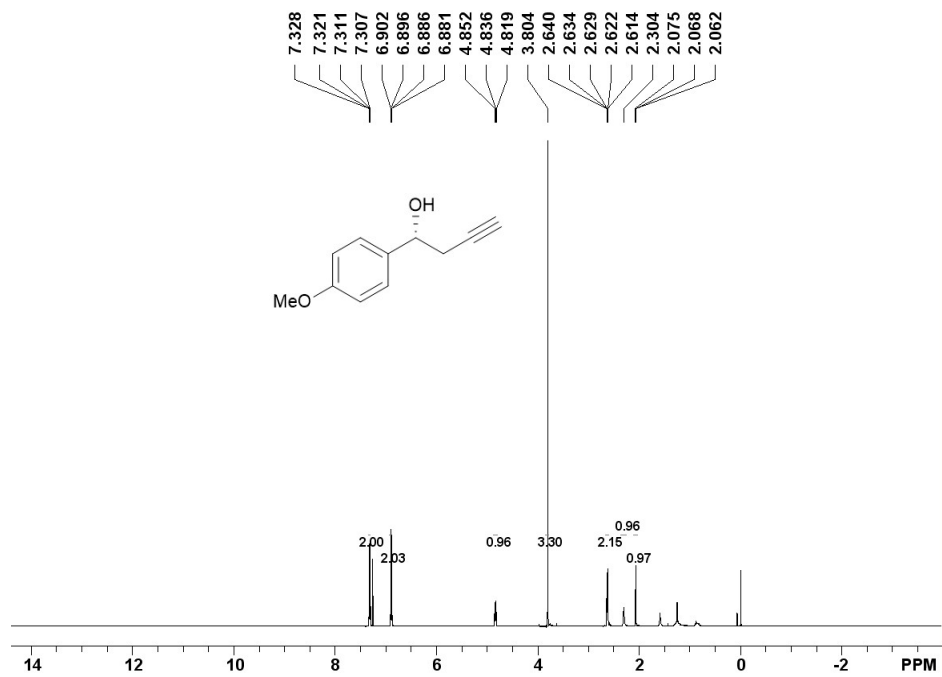

Supplementary Figure 36. <sup>1</sup>H NMR spectra for (*R*)-1-(4-Methoxyphenyl)-but-3-yn-1-ol

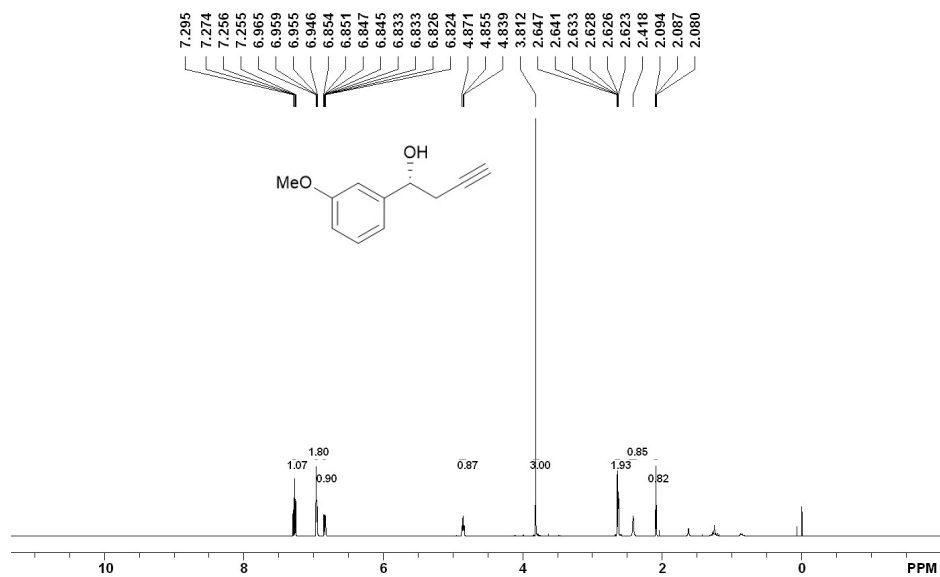

Supplementary Figure 37.  $^1\text{H}$  NMR spectra for (*R*)-1-(3-Methoxy-phenyl)-but-3-yn-1-ol

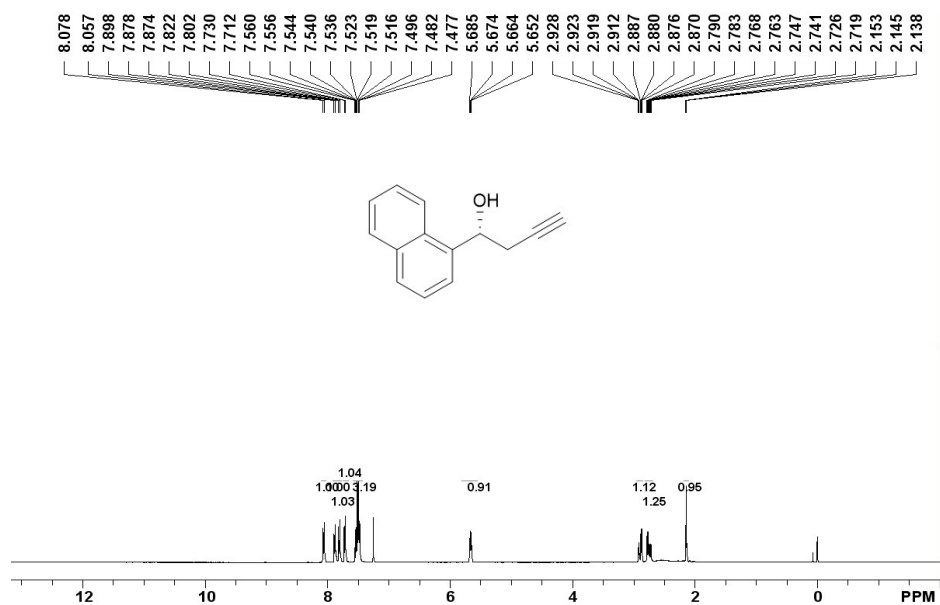

Supplementary Figure 38.  $^1\text{H}$  NMR spectra for (*R*)-1-(Naphthalen-1-yl)but-3-yn-1-ol

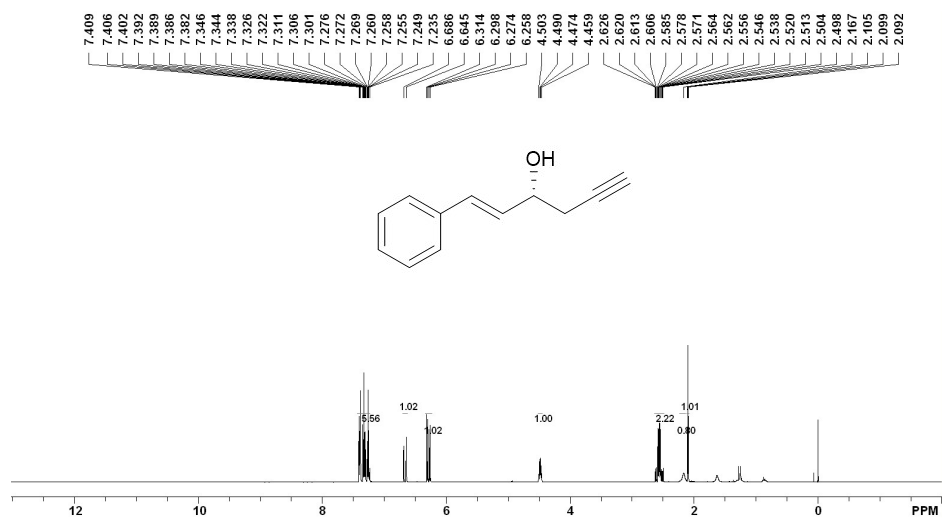

Supplementary Figure 39. <sup>1</sup>H NMR spectra for (*R*, *E*)-1-phenylhex-1-en-5-yn-3-ol



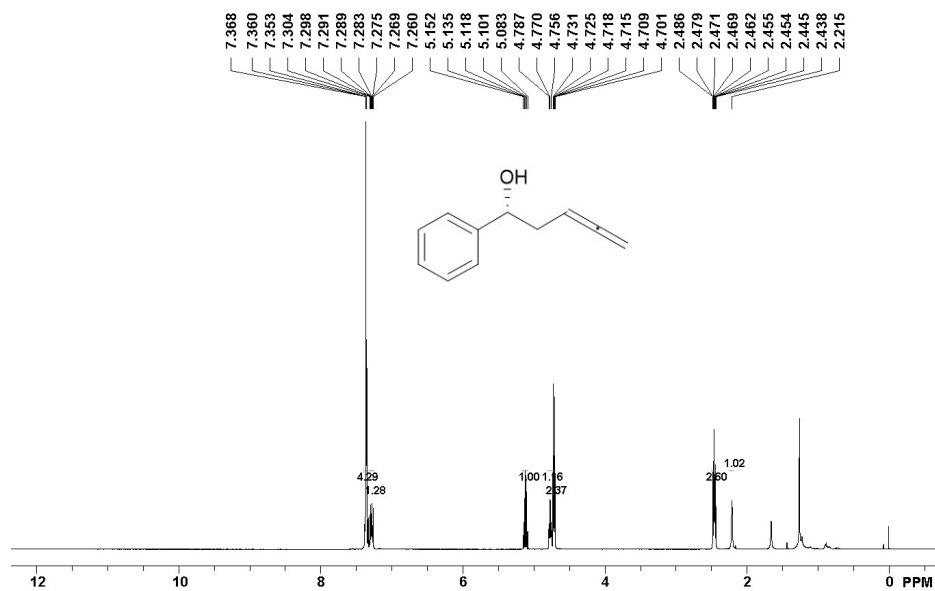

Supplementary Figure 41.  $^1\text{H}$  NMR spectra for (*R*)-1-phenylpenta-3,4-dien-1-ol

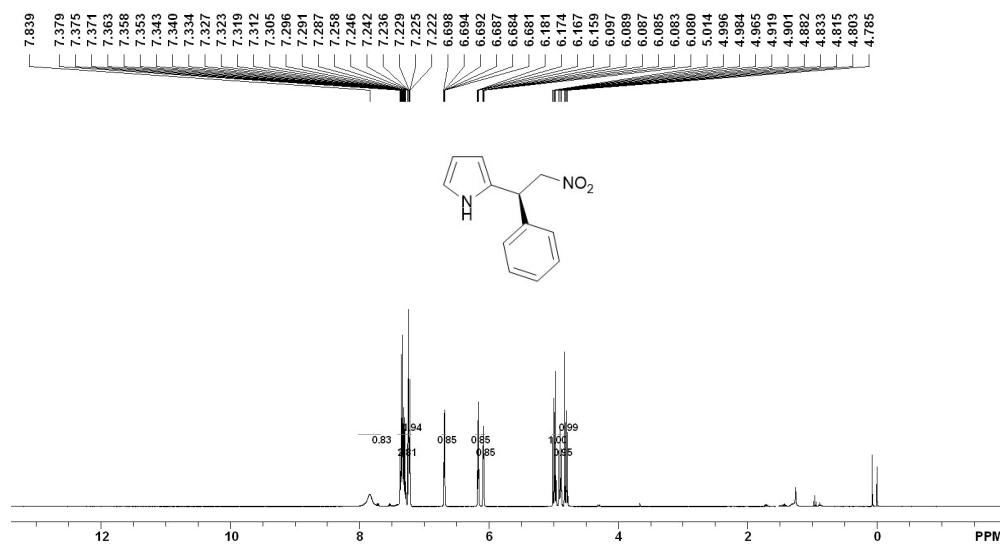

Supplementary Figure 42.  $^1\text{H}$  NMR spectra for (*R*)-2-(2-nitro-1-phenylethyl)-1*H*-pyrrole

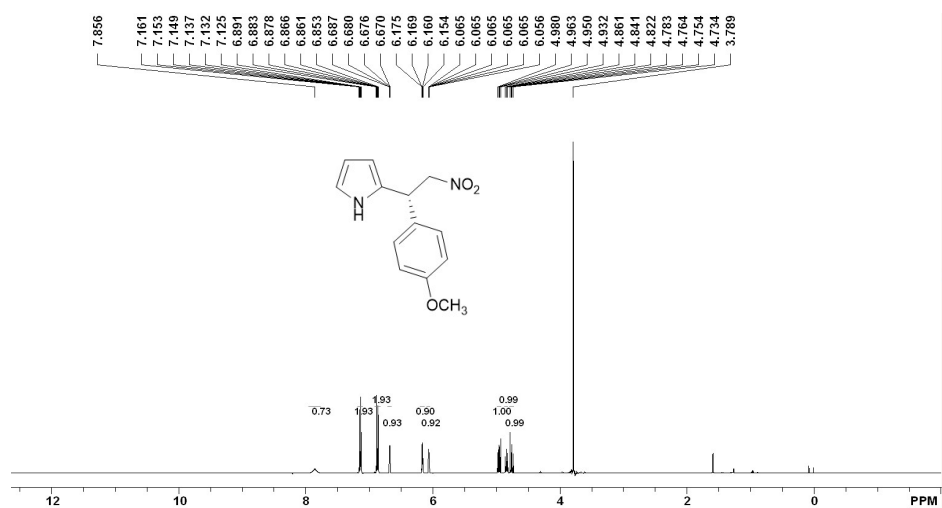

Supplementary Figure 43.  $^1\text{H}$  NMR spectra for (*S*)-2-(1-(4-methoxyphenyl)-2-nitroethyl)-1 *H*-pyrrole

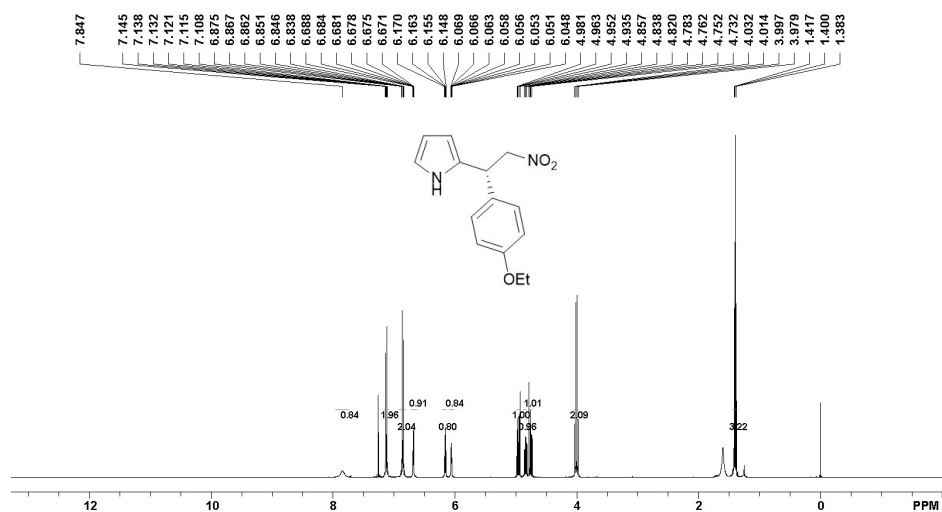

Supplementary Figure 44.  $^1\text{H}$  NMR spectra for (*S*)-2-(1-(4-ethoxyphenyl)-2-nitroethyl)-1 *H*-pyrrole



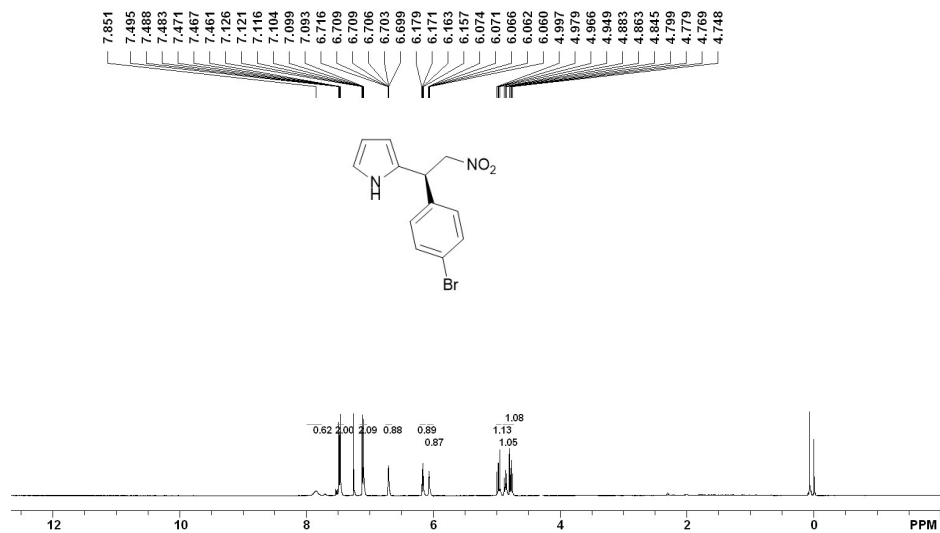

Supplementary Figure 45. <sup>1</sup>H NMR spectra for (*R*)-2-(1-(4-bromophenyl)-2-nitroethyl)-1*H*-pyrrole

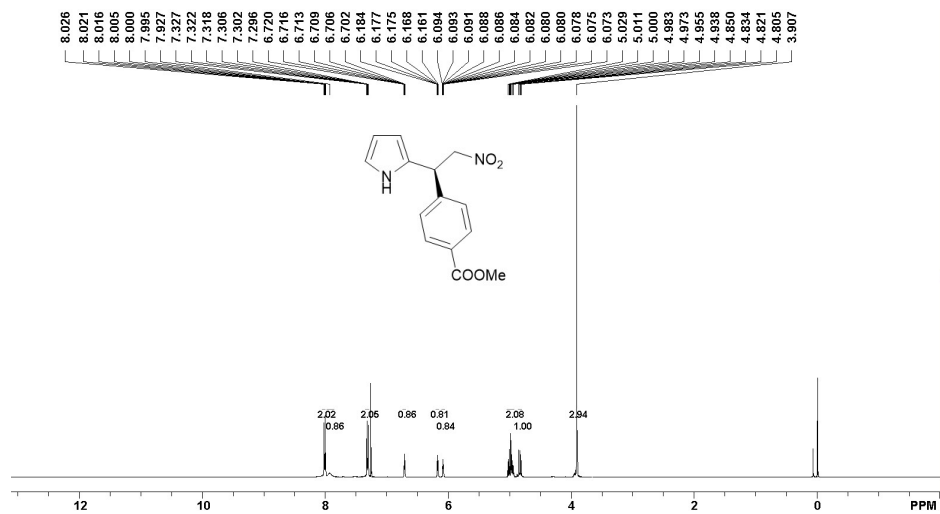

Supplementary Figure 46. <sup>1</sup>H NMR spectra for (*R*)-2-(1-(4-methoxycarbonyl)-2-nitroethyl)-1*H*-pyrrole

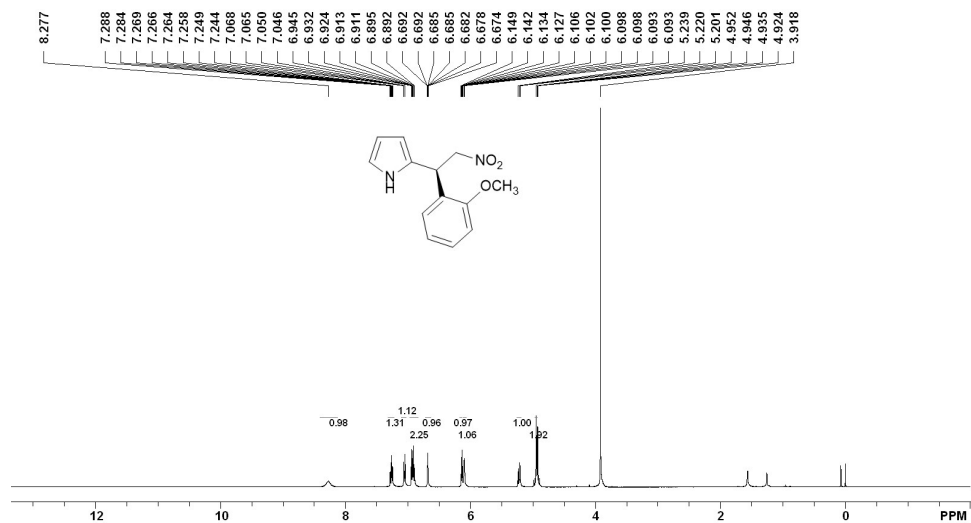

Supplementary Figure 47.  $^1\text{H}$  NMR spectra for (*R*)-2-(1-(2-methoxyphenyl)-2-nitroethyl)-1*H*-pyrrole

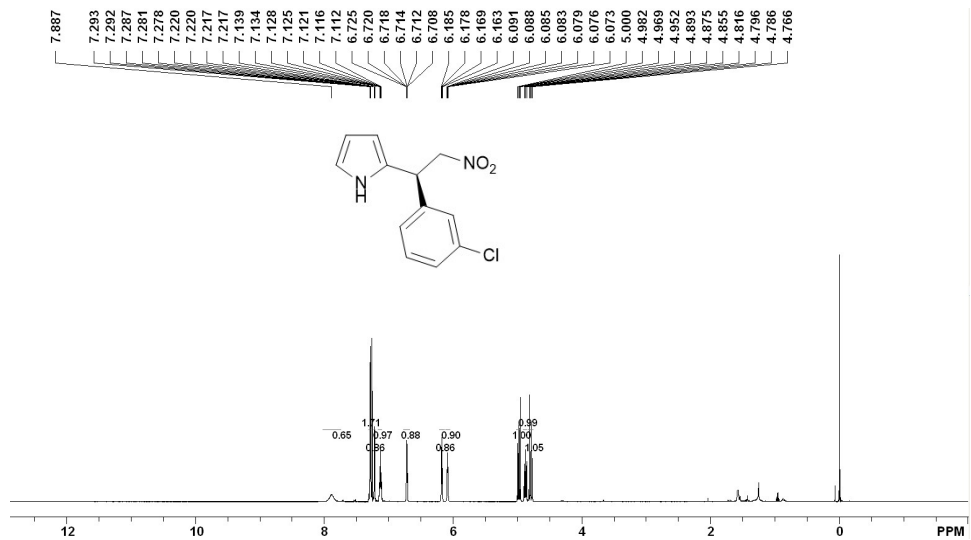

Supplementary Figure 48.  $^1\text{H}$  NMR spectra for (*R*)-2-(1-(3-chlorophenyl)-2-nitroethyl)-1*H*-pyrrole

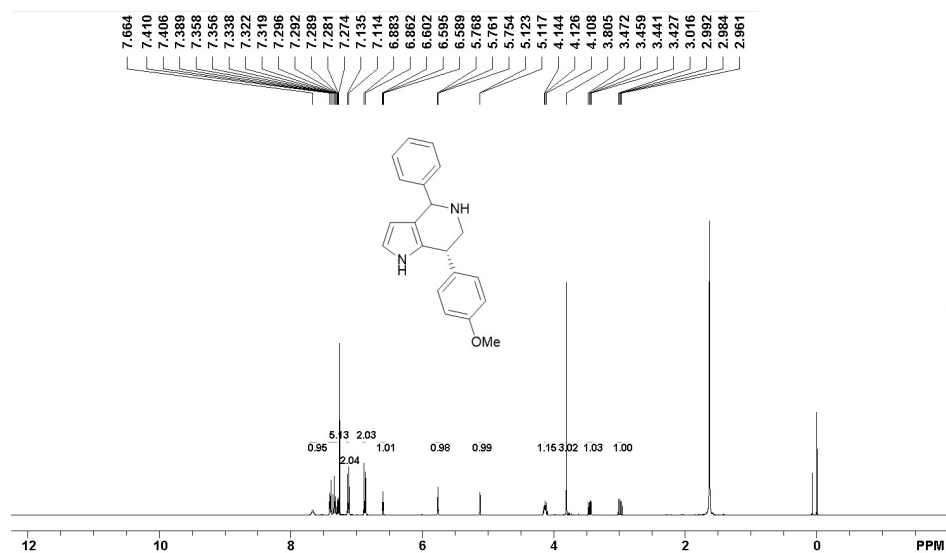

Supplementary Figure 49.  $^1\text{H}$  NMR spectra for (7*S*)-4-phenyl-7-(4-methoxyphenyl)-4,5,6,7-tetrahydro-1*H*-pyrrolo[3,2-*c*]pyridine

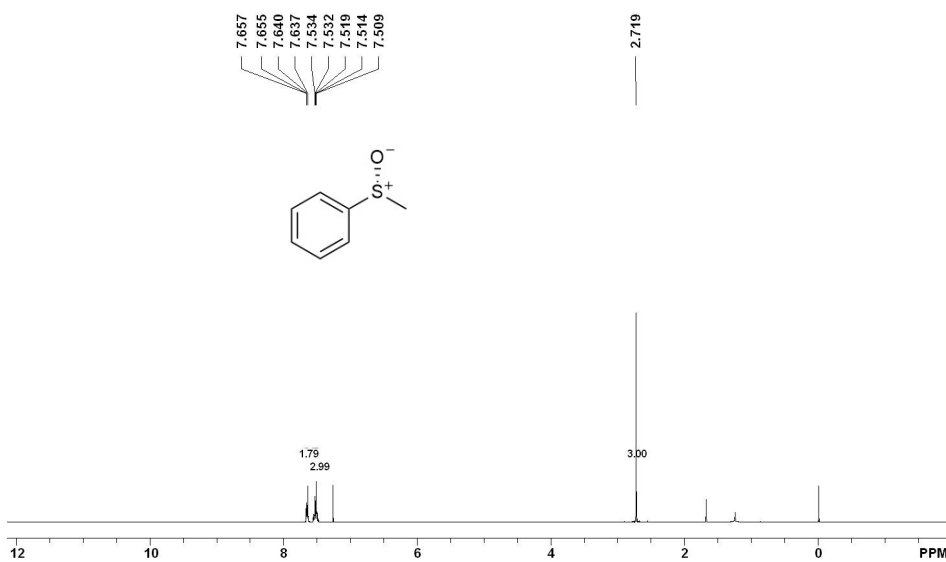

Supplementary Figure 50.  $^1\text{H}$  NMR spectra for (*S*)-Phenyl methyl sulfoxide

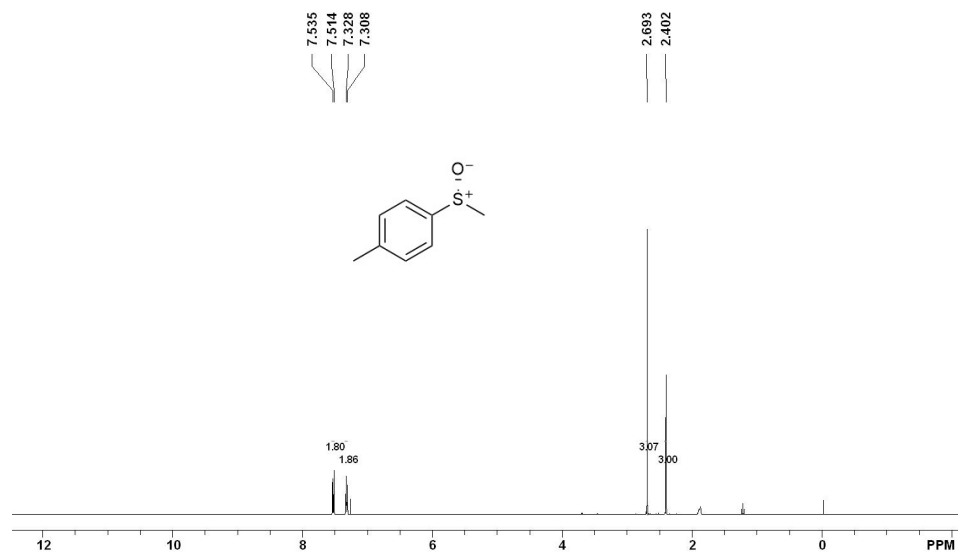

Supplementary Figure 51.  $^1\text{H}$  NMR spectra for (*S*)-*p*-Tolyl methyl sulfoxide

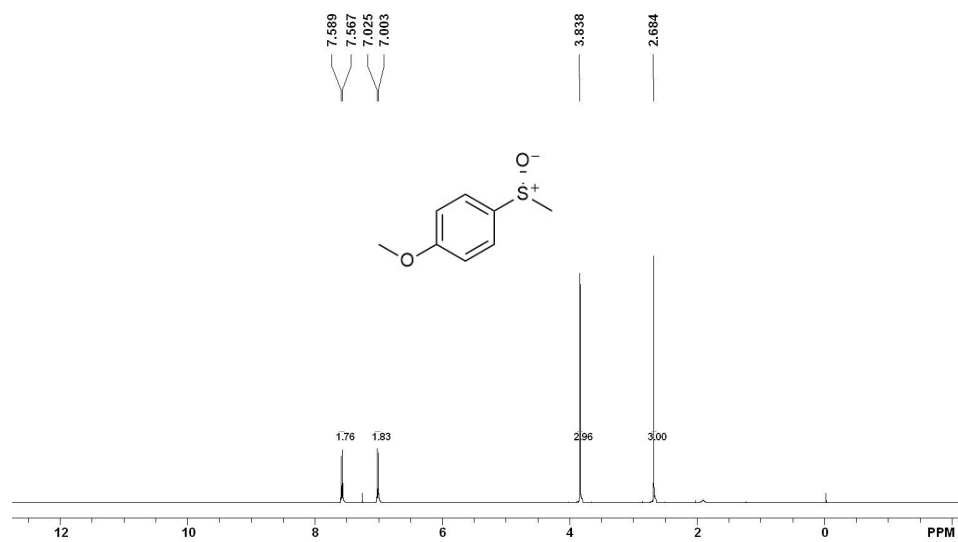

Supplementary Figure 52.  $^1\text{H}$  NMR spectra for (*S*)-*p*-Methoxyphenyl methyl sulfoxide

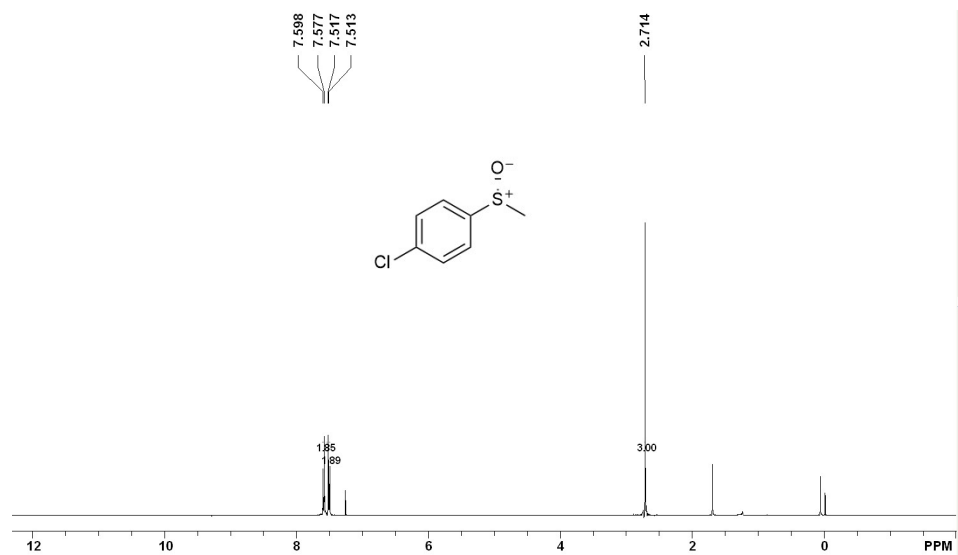

Supplementary Figure 53.  $^1\text{H}$  NMR spectra for (*S*)-*p*-Chlorophenyl methylsulfoxide

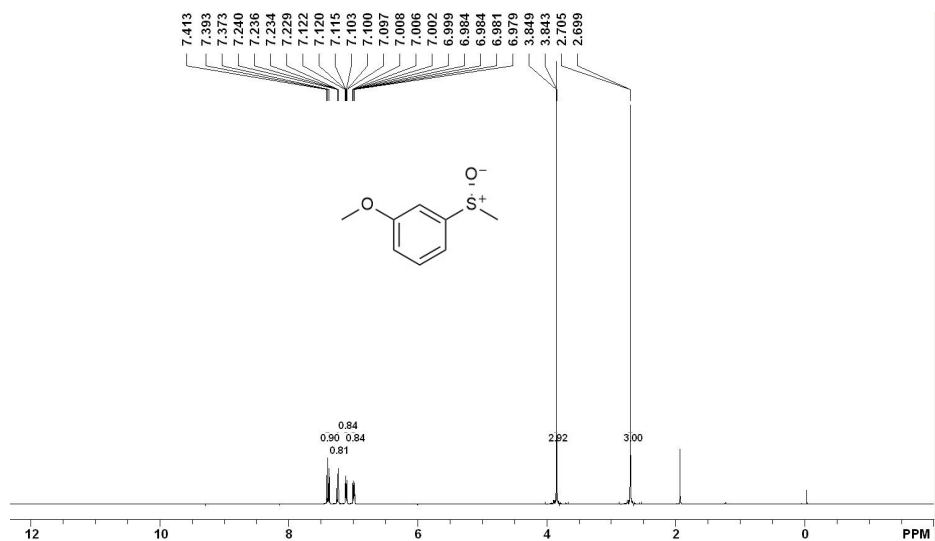

Supplementary Figure 54.  $^1\text{H}$  NMR spectra for (*S*)-*m*-Methoxyphenyl methylsulfoxide

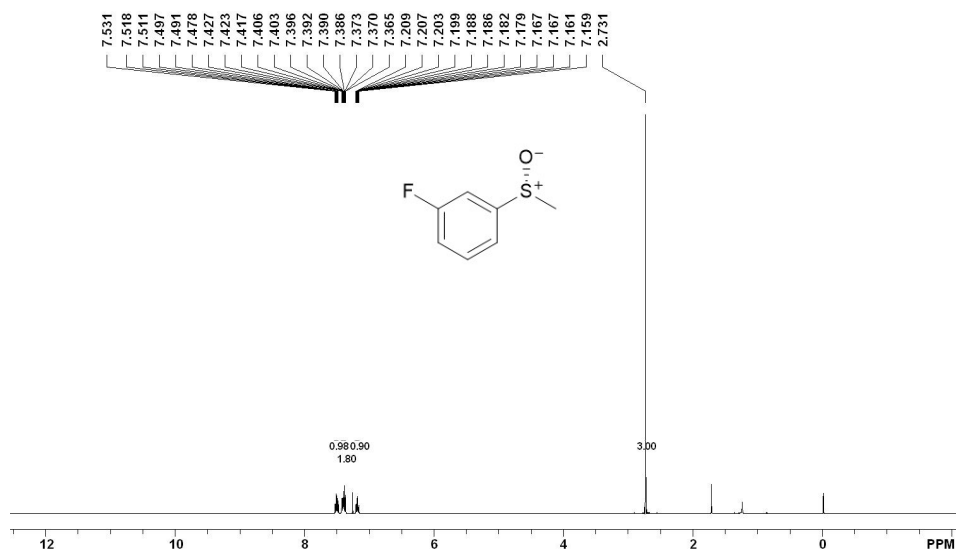

Supplementary Figure 55.  $^1\text{H}$  NMR spectra for (*S*)-*m*-Fluorophenyl methyl sulfoxide

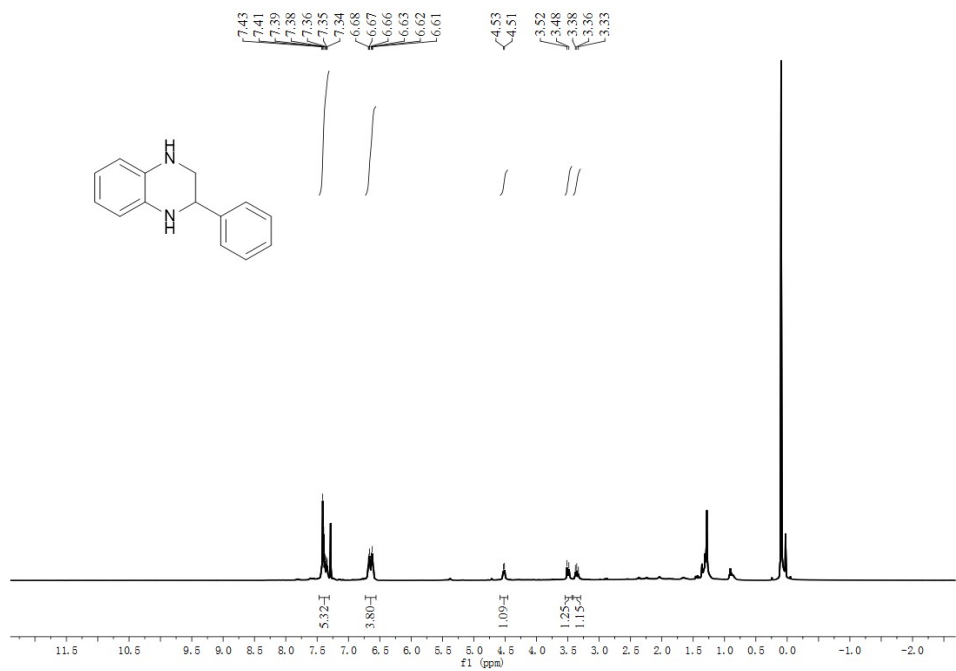

Supplementary Figure 56.  $^1\text{H}$  NMR spectra for 2-Phenyl-1,2,3,4-tetrahydroquinoline

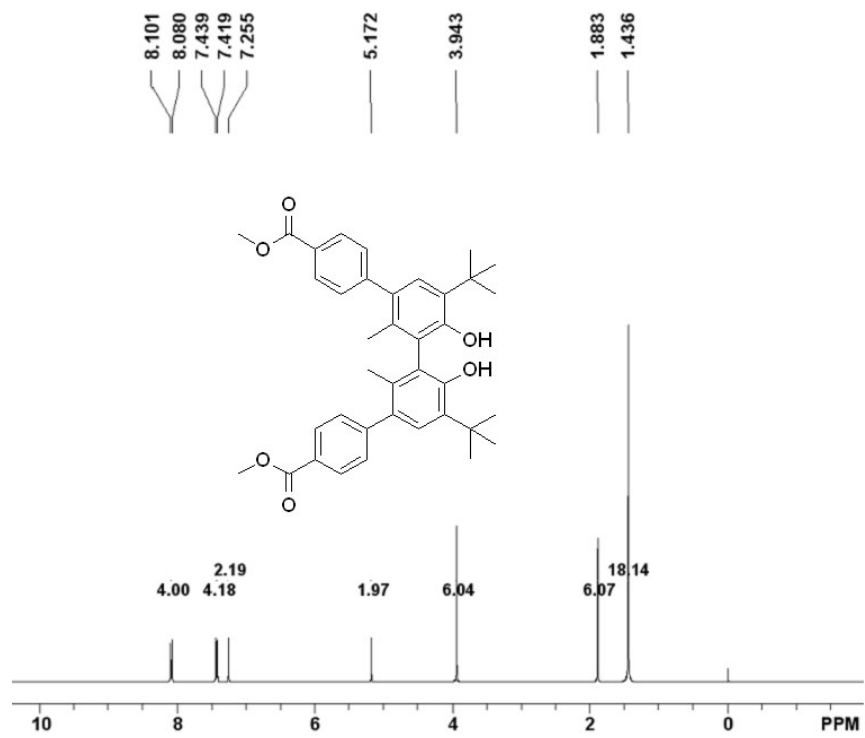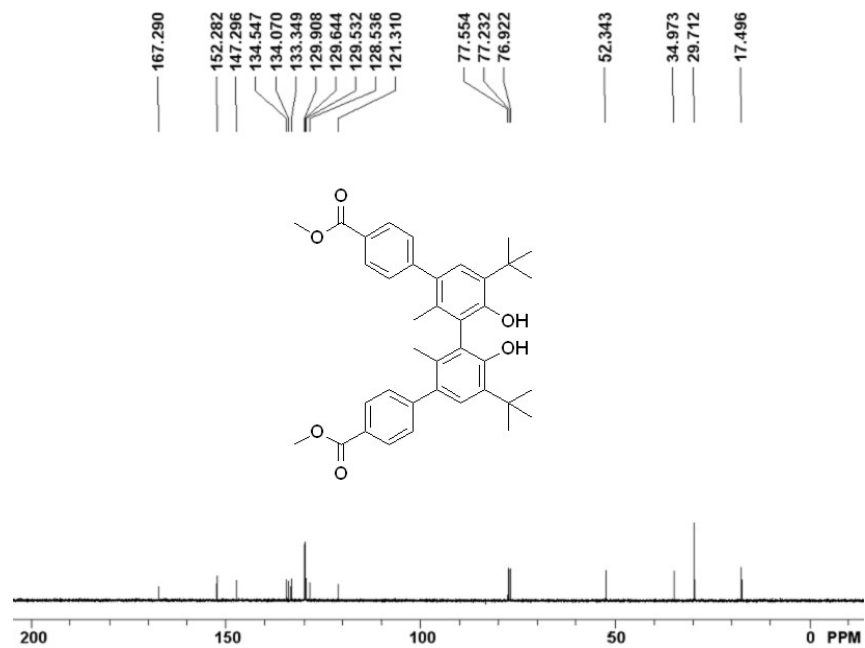

Supplementary Figure 57  $^1\text{H}$  NMR and  $^{13}\text{C}$  NMR spectra for S2

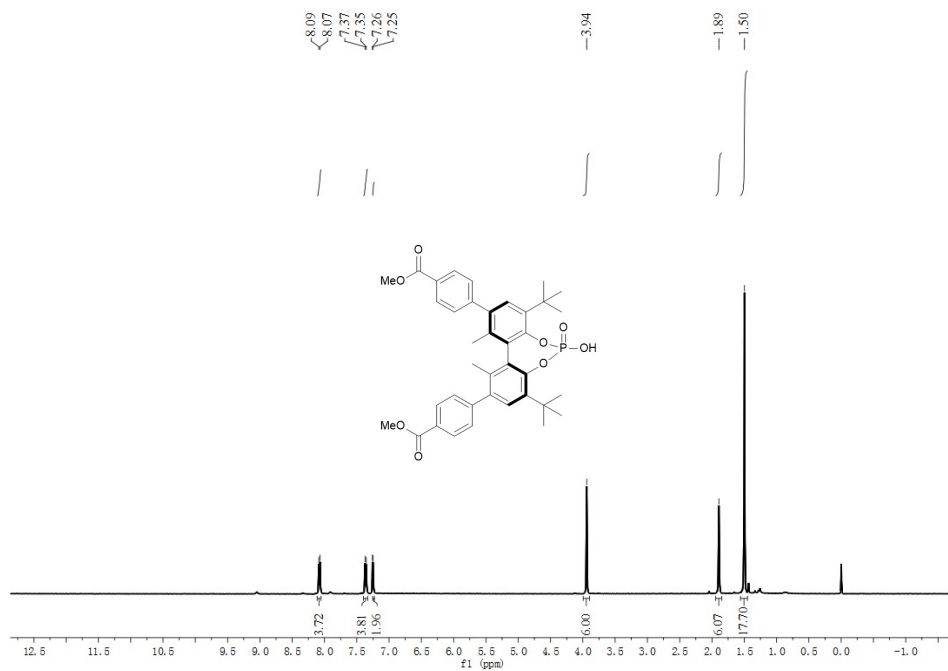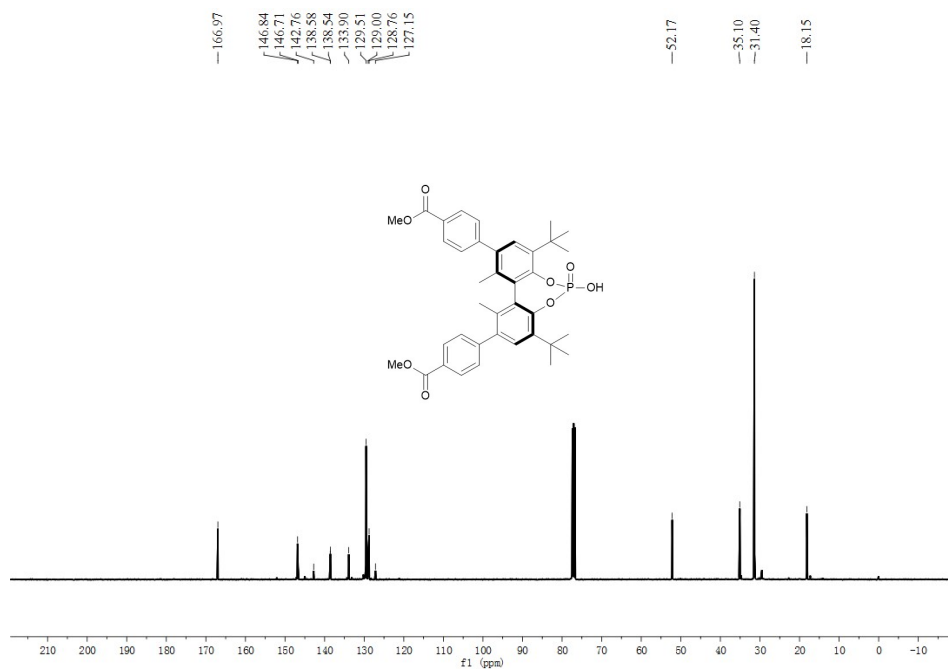

Supplementary Figure 58.  $^1\text{H}$  NMR and  $^{13}\text{C}$  NMR spectra for  $\text{Me}_2\text{L}$



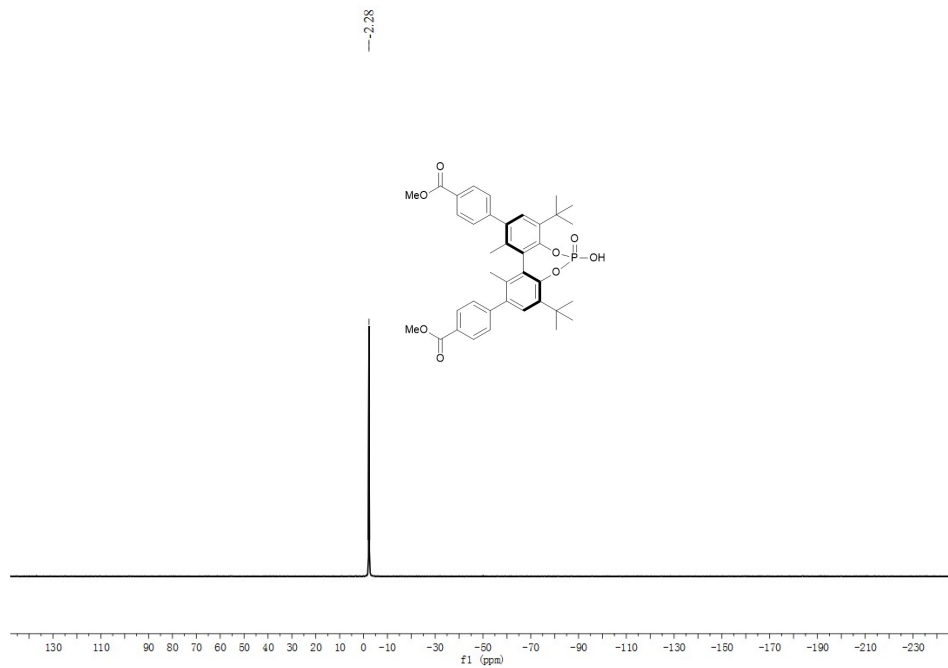

**Supplementary Figure 59.  $^{31}\text{P}$  NMR spectra for  $\text{Me}_2\text{L}$**

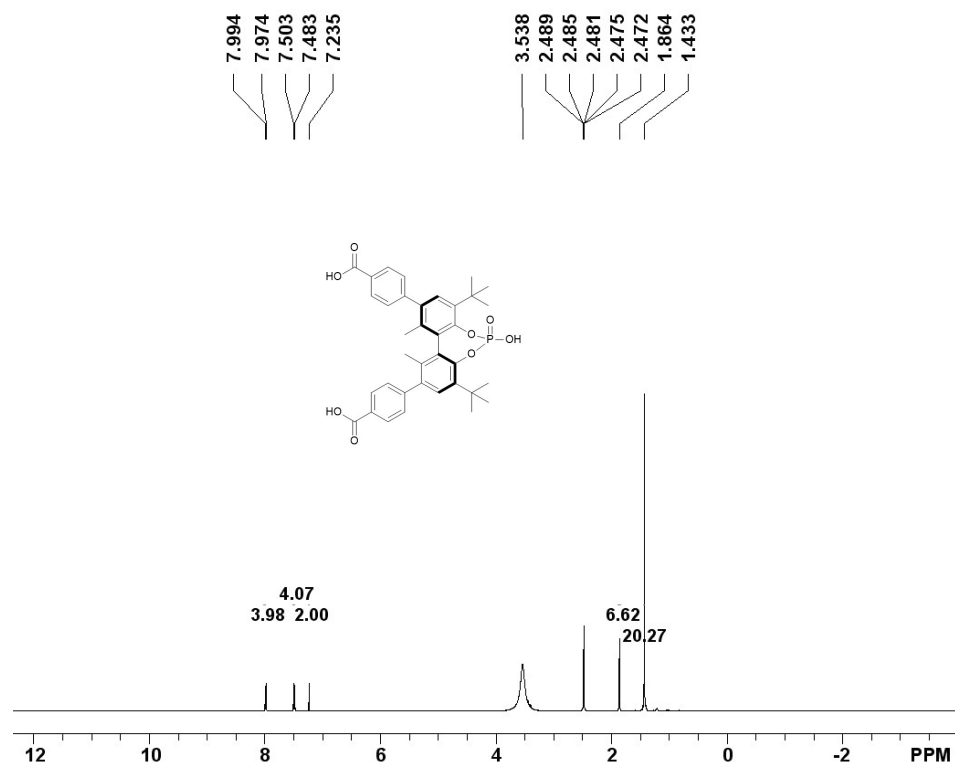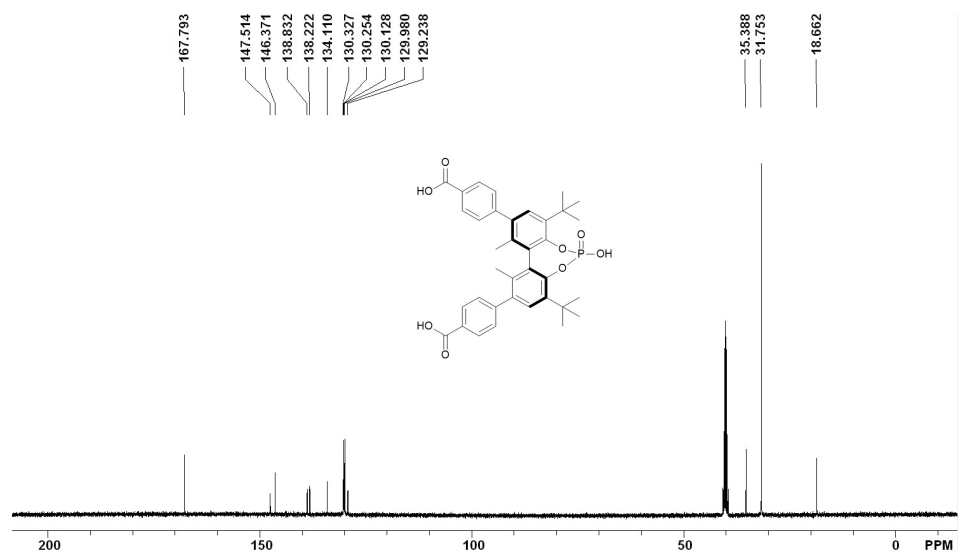

Supplementary Figure 60. <sup>1</sup>H NMR and <sup>13</sup>C NMR spectra for H<sub>3</sub>L

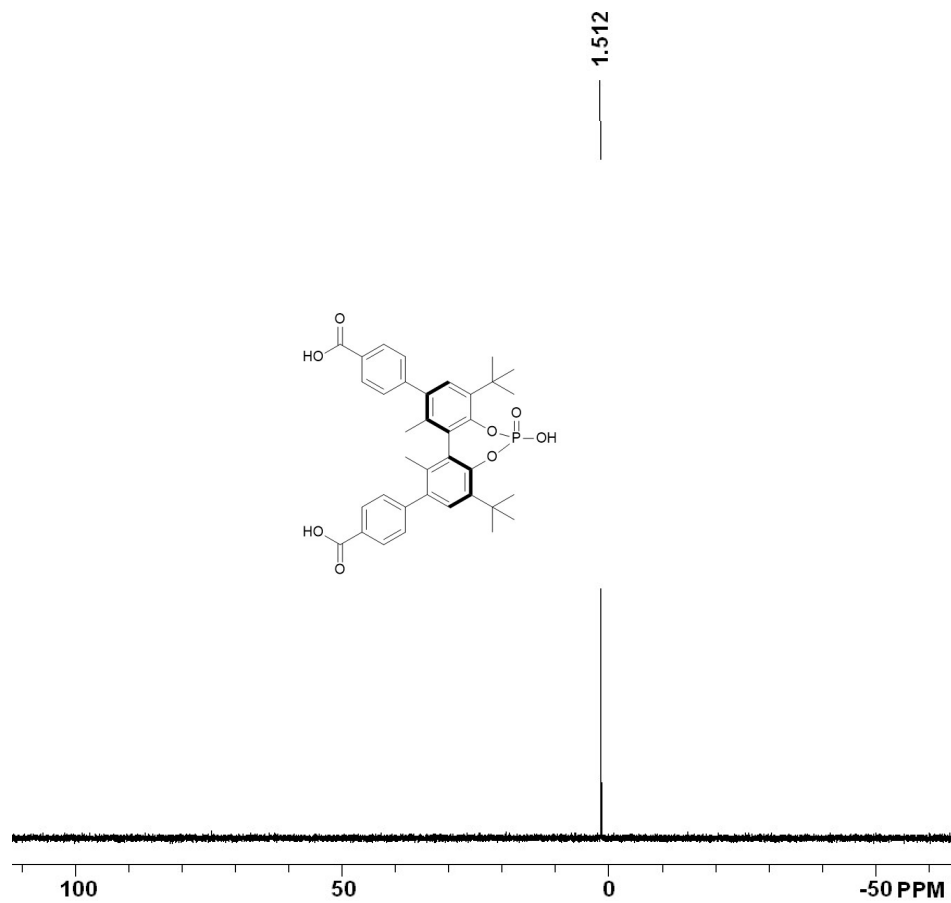

Supplementary Figure 61.  $^{31}\text{P}$  NMR spectra for H<sub>3</sub>L

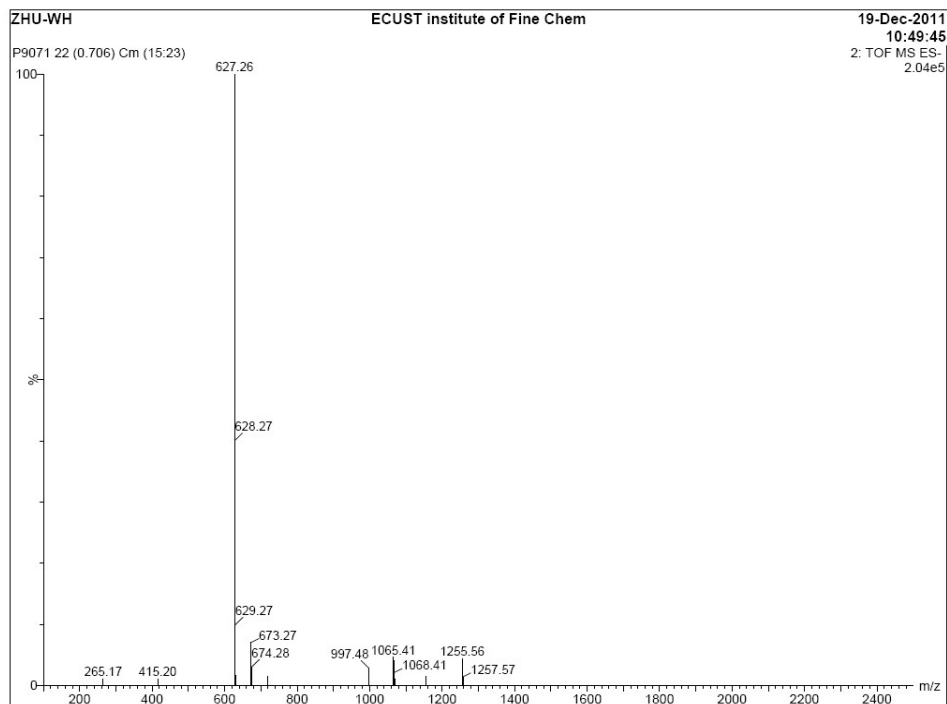

**Supplementary Figure 62. ESI-MS for H<sub>3</sub>L**

**Supplementary Table 1. The parameter of unit cell for 1-Cr/Mg/Mn**

| <b>H<sub>3</sub>L-Cr (1-Cr)</b>      | <b>H<sub>3</sub>L-Mg (1-Mg)</b>      | <b>H<sub>3</sub>L-Mn (1-Mn)</b>      |
|--------------------------------------|--------------------------------------|--------------------------------------|
| $a = 26.27$                          | $a = 27.29$                          | $a = 27.49$                          |
| $b = 28.30$                          | $b = 27.47$                          | $b = 28.48$                          |
| $c = 28.54$ $V = 21215$              | $c = 28.88$ $V = 21647$              | $c = 29.32$ $V = 22959$              |
| $\alpha = \beta = \gamma = 90^\circ$ | $\alpha = \beta = \gamma = 90^\circ$ | $\alpha = \beta = \gamma = 90^\circ$ |
| Orthorhombic C                       | Orthorhombic C                       | Orthorhombic C                       |

**Supplementary Table 2. Allylboration of aldehydes catalyzed by control catalysts<sup>a</sup>**

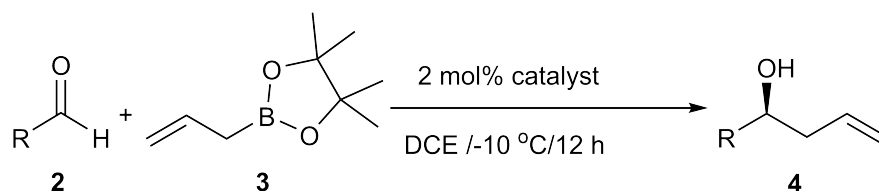

| entry           | R                    | catalyst            | yield (%) <sup>b</sup> | ee (%) <sup>c</sup> |
|-----------------|----------------------|---------------------|------------------------|---------------------|
| 1               | Ph                   | Me <sub>2</sub> L   | 72                     | 0                   |
| 2               | Ph                   | H <sub>3</sub> L    | 88                     | 0                   |
| 3 <sup>e</sup>  | Ph                   | H <sub>3</sub> L-Cr | 75                     | 20 ( <i>S</i> )     |
| 4 <sup>f</sup>  | Ph                   | 1-Cr                | 98                     | 83 ( <i>S</i> )     |
| 5 <sup>g</sup>  | Ph                   | 1-Cr                | 70                     | 23 ( <i>S</i> )     |
| 6               | Ph                   | --                  | 40                     | 0                   |
| 7               | 4-NO <sub>2</sub> Ph | Me <sub>2</sub> L   | 78                     | 0                   |
| 8               | 4-NO <sub>2</sub> Ph | H <sub>3</sub> L    | 85                     | 0                   |
| 9 <sup>e</sup>  | 4-NO <sub>2</sub> Ph | H <sub>3</sub> L-Cr | 74                     | 35 ( <i>S</i> )     |
| 10              | 4-ClPh               | Me <sub>2</sub> L   | 70                     | 0                   |
| 11              | 4-ClPh               | H <sub>3</sub> L    | 88                     | 0                   |
| 12 <sup>e</sup> | 4-ClPh               | H <sub>3</sub> L-Cr | 71                     | 33 ( <i>S</i> )     |
| 13              | DBBA <sup>d</sup>    | Me <sub>2</sub> L   | 84                     | 0                   |
| 14              | DBBA <sup>d</sup>    | H <sub>3</sub> L    | 88                     | 0                   |
| 15 <sup>e</sup> | DBBA <sup>d</sup>    | H <sub>3</sub> L-Cr | 38                     | 0                   |

<sup>a</sup>Reaction conditions: **2** (0.10 mmol), **3** (0.12 mmol) and **Cat.** (**1-Cr**, 2 mol% loading, based on MOF; H<sub>3</sub>L-Cr, 6 mol% loading, based on Cr; Me<sub>2</sub>L/H<sub>3</sub>L, 0.004 mmol) in DCE (0.8 mL), -10 °C, 12 h. <sup>b</sup>Isolated yield. <sup>c</sup>Determined by chiral HPLC analysis. <sup>d</sup>DBBA = 3,5-dibenzoyloxybenzaldehyde. <sup>e</sup>H<sub>3</sub>L-Cr (6 mol% loading, based on Cr) was used as the catalyst, which cannot dissolve in DCE. <sup>f</sup>After completion of reaction, the supernatant was condensed and analyzed by <sup>31</sup>P NMR to detect free phosphoric acid (Supplementary Fig. 1). <sup>g</sup>Unactivated **1-Cr**.

**Supplementary Table 3. Propargylation of aldehydes catalyzed by control catalysts<sup>a</sup>**

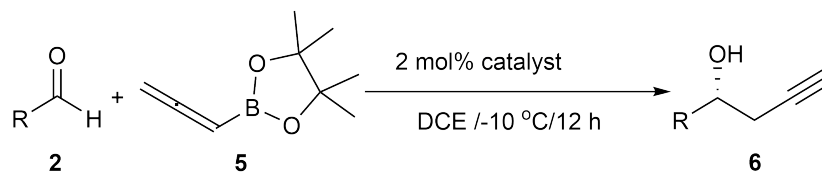

| entry           | R                 | catalyst            | yield (%) <sup>b</sup> | ee (%) <sup>c</sup> |
|-----------------|-------------------|---------------------|------------------------|---------------------|
| 1               | Ph                | Me <sub>2</sub> L   | 70                     | 0                   |
| 2               | Ph                | H <sub>3</sub> L    | 88                     | 0                   |
| 3 <sup>e</sup>  | Ph                | H <sub>3</sub> L-Cr | 67                     | 50 ( <i>R</i> )     |
| 4 <sup>f</sup>  | Ph                | 1-Cr                | 92                     | 92 ( <i>R</i> )     |
| 5 <sup>g</sup>  | Ph                | 1-Cr                | 65                     | 55 ( <i>R</i> )     |
| 6               | 4-MeOPh           | Me <sub>2</sub> L   | 70                     | 0                   |
| 7               | 4-MeOPh           | H <sub>3</sub> L    | 83                     | 0                   |
| 8 <sup>e</sup>  | 4-MeOPh           | H <sub>3</sub> L-Cr | 71                     | 42 ( <i>R</i> )     |
| 9               | DBBA <sup>d</sup> | Me <sub>2</sub> L   | 78                     | 0                   |
| 10              | DBBA <sup>d</sup> | H <sub>3</sub> L    | 84                     | 0                   |
| 11 <sup>e</sup> | DBBA <sup>d</sup> | H <sub>3</sub> L-Cr | 0                      | 0                   |

<sup>a</sup>Reaction conditions: **2** (0.10 mmol), **5** (0.15 mmol) and **Cat.** (**1-Cr**, 2 mol% loading, based on MOF; H<sub>3</sub>L-Cr, 6 mol% loading, based on Cr; Me<sub>2</sub>L/H<sub>3</sub>L, 0.004 mmol) in DCE (0.8 mL), -10 °C, 12 h. <sup>b</sup>Isolated yield. <sup>c</sup>Determined by chiral HPLC analysis. <sup>d</sup>DBBA = 3,5-dibenzyloxybenzaldehyde. <sup>e</sup>H<sub>3</sub>L-Cr (6 mol% loading, based on Cr) was used as the catalyst, which cannot dissolve in DCE. <sup>f</sup>After completion of reaction, the supernatant was condensed and analyzed by <sup>31</sup>P NMR to detect free phosphoric acid (Supplementary Fig. 2). <sup>g</sup>Unactivated **1-Cr**.

Supplementary Table 4. Friedel-Crafts alkylation of pyrrole with nitroalkenes catalyzed by control catalysts<sup>a</sup>

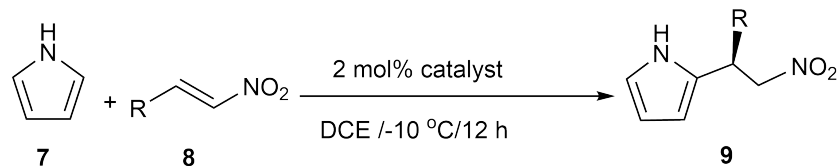

| entry           | R       | catalyst             | yield (%) <sup>b</sup> | ee (%) <sup>c</sup> |
|-----------------|---------|----------------------|------------------------|---------------------|
| 1               | Ph      | Me <sub>2</sub> L    | 63                     | 0                   |
| 2               | Ph      | H <sub>3</sub> L     | 88                     | 0                   |
| 3 <sup>d</sup>  | Ph      | H <sub>3</sub> L-Mg  | 50                     | 29 ( <i>S</i> )     |
| 4 <sup>e</sup>  | Ph      | 1- Mg                | 89                     | 90 ( <i>S</i> )     |
| 5 <sup>f</sup>  | Ph      | 1- Mg                | 43                     | 31 ( <i>S</i> )     |
| 6               | 4-MeOPh | Me <sub>2</sub> L    | 61                     | 0                   |
| 7               | 4-MeOPh | H <sub>3</sub> L     | 80                     | 0                   |
| 8 <sup>d</sup>  | 4-MeOPh | H <sub>3</sub> L- Mg | 65                     | 38 ( <i>S</i> )     |
| 9               | 4-EtOPh | Me <sub>2</sub> L    | 65                     | 0                   |
| 10              | 4-EtOPh | H <sub>3</sub> L     | 80                     | 0                   |
| 11 <sup>d</sup> | 4-EtOPh | H <sub>3</sub> L- Mg | 55                     | 35 ( <i>S</i> )     |

<sup>a</sup>Reaction conditions: **7** (0.3 mmol), **8** (0.1 mmol), **Cat.** (**1-Mg**, 2 mol% loading, based on MOF; H<sub>3</sub>L-**Mg**, 6 mol% loading, based on Mg; Me<sub>2</sub>L/H<sub>3</sub>L, 0.004 mmol) in DCE (0.8 mL), -10 °C, 12 h. <sup>b</sup>Isolated yields. <sup>c</sup>Determined by chiral HPLC analysis. <sup>d</sup>H<sub>3</sub>L-Cr (6 mol% loading, based on Mg) was used as the catalyst. <sup>e</sup>After completion of reaction, the supernatant was condensed and analyzed by <sup>31</sup>P NMR to detect free phosphoric acid (Supplementary Fig. 3). <sup>f</sup>Unactivated **1-Mg**.

**Supplementary Table 5. Oxidation of sulfide catalyzed by control catalysts<sup>a</sup>**

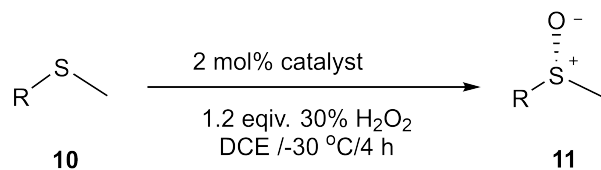

| entry           | R       | catalyst            | conv. (%) <sup>b</sup> | yield (%) <sup>b</sup> | ee (%) <sup>c</sup> |
|-----------------|---------|---------------------|------------------------|------------------------|---------------------|
| 1               | Ph      | Me <sub>2</sub> L   | 59                     | 48                     | 0                   |
| 2               | Ph      | H <sub>3</sub> L    | 75                     | 50                     | 0                   |
| 3 <sup>c</sup>  | Ph      | H <sub>3</sub> L-Mn | 64                     | 50                     | 41 ( <i>S</i> )     |
| 4 <sup>f</sup>  | Ph      | 1-Mn                | 99                     | 93                     | 92 ( <i>S</i> )     |
| 5 <sup>g</sup>  | Ph      | 1-Mn                | 53                     | 41                     | 47 ( <i>S</i> )     |
| 6               | 4-MePh  | Me <sub>2</sub> L   | 56                     | 47                     | 0                   |
| 7               | 4-MePh  | H <sub>3</sub> L    | 60                     | 41                     | 0                   |
| 8 <sup>c</sup>  | 4-MePh  | H <sub>3</sub> L-Mn | 71                     | 65                     | 51 ( <i>S</i> )     |
| 9               | 4-MeOPh | Me <sub>2</sub> L   | 65                     | 54                     | 0                   |
| 10              | 4-MeOPh | H <sub>3</sub> L    | 72                     | 59                     | 0                   |
| 11 <sup>c</sup> | 4-MeOPh | H <sub>3</sub> L-Mn | 55                     | 47                     | 44 ( <i>S</i> )     |

<sup>a</sup>Reaction conditions: **10** (0.1 mmol), **Cat.** (**1-Mn**, 2 mol% loading, based on MOF; H<sub>3</sub>L-Mn, 6 mol% loading, based on Mn; Me<sub>2</sub>L/H<sub>3</sub>L, 0.004 mmol), 1.2 equiv. aqueous H<sub>2</sub>O<sub>2</sub> in DCE (0.8 mL), -30 °C, 4 h. Over-oxidized sulfone byproducts were detected. <sup>b</sup>Determined by <sup>1</sup>H NMR analysis. <sup>c</sup>Isolated yields. <sup>d</sup>Determined by chiral HPLC analysis. <sup>e</sup>H<sub>3</sub>L-Cr (6 mol% loading, based on Mn) was used as the catalyst. <sup>f</sup>After completion of reaction, the supernatant was condensed and analyzed by <sup>31</sup>P NMR to detect free phosphoric acid (Supplementary Fig. 4). <sup>g</sup>Unactivated **1-Mn**.



**Supplementary Table 6. Hydrogenation of quinoxalines with Hantzsch esters applied as the hydrogen source<sup>a</sup>**

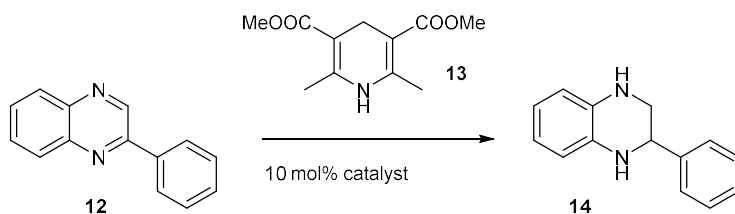

| entry | catalyst          | yield (%) <sup>b</sup> |
|-------|-------------------|------------------------|
| 1     | 1-Cr              | 0                      |
| 2     | 1-Mn              | 0                      |
| 3     | 1-Mg              | 0                      |
| 4     | Me <sub>2</sub> L | 90                     |
| 5     | H <sub>3</sub> L  | 98                     |

<sup>a</sup>Reaction conditions: **12** (0.1 mmol), **13** (2.4 equiv), **Cat.** (MOFs, 10 mol% loading, based on MOF; Me<sub>2</sub>L/H<sub>3</sub>L, 0.02 mmol), CHCl<sub>3</sub> (0.5 mL), 60 °C, 24 h. <sup>b</sup>Isolated yields.

**Supplementary Table 7. X-ray crystallography of 1-Cr/Mn/Ga<sup>5</sup>**

| Compound                                    | <b>1-Cr</b>                                                                                         | <b>1-Mn</b>                                                                                         | <b>1-Ga</b>                                                                                      |
|---------------------------------------------|-----------------------------------------------------------------------------------------------------|-----------------------------------------------------------------------------------------------------|--------------------------------------------------------------------------------------------------|
| Empirical formula                           | C <sub>78</sub> H <sub>79</sub> Cr <sub>3</sub> O <sub>23</sub> P <sub>2</sub>                      | C <sub>72</sub> H <sub>72</sub><br>Mn <sub>3</sub> O <sub>18</sub> P <sub>2</sub>                   | C <sub>78</sub> H <sub>79</sub> Ga <sub>3</sub> O <sub>23</sub> P <sub>2</sub>                   |
| Formula weight                              | 1602.35                                                                                             | 1452.6                                                                                              | 1655.51                                                                                          |
| Temperature (K)                             | 123(2)                                                                                              | 123(2)                                                                                              | 123(2)                                                                                           |
| Wavelength (Å)                              | 1.54178                                                                                             | 1.5478                                                                                              | 1.5478                                                                                           |
| Crystal system                              | Orthorhombic                                                                                        | Orthorhombic                                                                                        | Orthorhombic                                                                                     |
| Space group                                 | C222 <sub>1</sub>                                                                                   | C222 <sub>1</sub>                                                                                   | C222 <sub>1</sub>                                                                                |
| Unit cell dimensions                        | $a = 26.8122(5),$<br>$b = 29.1445(5),$<br>$c = 29.4502(7),$<br>$\alpha = \beta = \gamma = 90^\circ$ | $a = 27.3307(12)$<br>$b = 29.1106(12)$<br>$c = 29.5760(12)$<br>$\alpha = \beta = \gamma = 90^\circ$ | $a = 27.4162(7)$<br>$b = 29.2521(8)$<br>$c = 29.6153(7)$<br>$\alpha = \beta = \gamma = 90^\circ$ |
| Volume (Å <sup>3</sup> ),                   | 23013.2(7),                                                                                         | 23531.1(17),                                                                                        | 23750.9(11),                                                                                     |
| Z                                           | 8                                                                                                   | 8                                                                                                   | 8                                                                                                |
| Density (calcd. mg/m <sup>3</sup> )         | 0.925                                                                                               | 0.820                                                                                               | 0.926                                                                                            |
| Absorption coeff. (mm <sup>-1</sup> )       | 2.980                                                                                               | 3.181                                                                                               | 1.461                                                                                            |
| <i>F</i> (000)                              | 6664                                                                                                | 6024                                                                                                | 6832                                                                                             |
| $\theta$ range data collection              | 2.24 ~ 55.00                                                                                        | 2.22 ~ 60                                                                                           | 4.25 ~ 68.41                                                                                     |
| Limiting indices                            | $-16 \leq h \leq 28,$<br>$-30 \leq k \leq 30,$<br>$-31 \leq l \leq 31$                              | $-30 \leq h \leq 30,$<br>$-32 \leq k \leq 31,$<br>$-33 \leq l \leq 33$                              | $-32 \leq h \leq 30,$<br>$-28 \leq k \leq 34,$<br>$-27 \leq l \leq 35$                           |
| Reflections collected                       | 27381                                                                                               | 50084                                                                                               | 39265                                                                                            |
| Independent reflections                     | 13840 ( $R_{\text{int}} =$<br>0.0260)                                                               | 17096 ( $R_{\text{int}} =$<br>0.0876)                                                               | 20235 ( $R_{\text{int}} =$<br>0.0529)                                                            |
| Completeness to theta                       | 55.00/ 98.8 %                                                                                       | 60.00/99.3%                                                                                         | 68.41/97.9%                                                                                      |
| Refinement method                           | Full-matrix least-squares on $F^2$                                                                  |                                                                                                     |                                                                                                  |
| Data / restraints /<br>parameters           | 13840 /33 /790                                                                                      | 17096 /19 /760                                                                                      | 20356 /36 /787                                                                                   |
| Goodness-of-fit on $F^2$                    | 1.158                                                                                               | 1.050                                                                                               | 1.101                                                                                            |
| Final <i>R</i> indices [ $I > 2\sigma(I)$ ] | $R_1 = 0.0893,$                                                                                     | $R_1 = 0.0944,$                                                                                     | $R_1 = 0.0851,$                                                                                  |

|                                                  |                                    |                                    |                                    |
|--------------------------------------------------|------------------------------------|------------------------------------|------------------------------------|
|                                                  | $wR_2 = 0.2676$                    | $wR_2 = 0.2489$                    | $wR_2 = 0.2356$                    |
| <i>R</i> indices (all data)                      | $R_1 = 0.0919,$<br>$wR_2 = 0.2788$ | $R_1 = 0.1094,$<br>$wR_2 = 0.2672$ | $R_1 = 0.1187,$<br>$wR_2 = 0.2563$ |
| Absolute structure parameter                     | 0.282(6)                           | 0.358(7)                           | -0.09(3)                           |
| Largest diff. peak and hole (e.Å <sup>-3</sup> ) | 1.535 and<br>-0.780                | 1.100 and<br>-0.664                | 0.623 and -0.855                   |

**Supplementary Table 8. X-ray crystallography of 1-Zr and 1-Ti.**

| Compound                                            | <b>1-Zr</b>                                                                    | <b>1-Ti</b>                                                                    |
|-----------------------------------------------------|--------------------------------------------------------------------------------|--------------------------------------------------------------------------------|
| Empirical formula                                   | C <sub>78</sub> H <sub>82</sub> O <sub>26</sub> P <sub>2</sub> Zr <sub>3</sub> | C <sub>78</sub> H <sub>82</sub> O <sub>26</sub> P <sub>2</sub> Ti <sub>3</sub> |
| Formula weight                                      | 1771.04                                                                        | 1641.08                                                                        |
| Temperature (K)                                     | 123(2)                                                                         | 123(2)                                                                         |
| Wavelength (Å)                                      | 1.54178                                                                        | 0.71073                                                                        |
| Crystal system                                      | Orthorhombic                                                                   | Orthorhombic                                                                   |
| Space group                                         | <i>C</i> 222 <sub>1</sub>                                                      | <i>C</i> 222 <sub>1</sub>                                                      |
| Unit cell dimensions                                | <i>a</i> = 27.0284(6)                                                          | <i>a</i> = 27.341(11)                                                          |
|                                                     | <i>b</i> = 29.1892(6)                                                          | <i>b</i> = 29.274(10)                                                          |
|                                                     | <i>c</i> = 29.5728(6)                                                          | <i>c</i> = 29.662(10)                                                          |
|                                                     | $\alpha = \beta = \gamma = 90^\circ$                                           | $\alpha = \beta = \gamma = 90^\circ$                                           |
| Volume (Å <sup>3</sup> )                            | 23331.1(8)                                                                     | 23741(14)                                                                      |
| Z                                                   | 8                                                                              | 8                                                                              |
| Density (calcd. mg/m <sup>3</sup> )                 | 1.008                                                                          | 0.918                                                                          |
| Absorption coeff. (mm <sup>-1</sup> )               | 2.868                                                                          | 0.276                                                                          |
| <i>F</i> (000)                                      | 7264                                                                           | 6832                                                                           |
| $\theta$ range data collection                      | 2.23 ~ 55.00                                                                   | 1.02 ~ 25                                                                      |
| Limiting indices                                    | -19 ≤ <i>h</i> ≤ 28,<br>-30 ≤ <i>k</i> ≤ 30,<br>-22 ≤ <i>l</i> ≤ 31            | -32 ≤ <i>h</i> ≤ 22,<br>-28 ≤ <i>k</i> ≤ 34,<br>-35 ≤ <i>l</i> ≤ 35            |
| Reflections collected                               | 26597                                                                          | 67695                                                                          |
| Independent reflections                             | 13060 ( <i>R</i> <sub>int</sub> = 0.0325)                                      | 20885 ( <i>R</i> <sub>int</sub> = 0.1818)                                      |
| Completeness to theta                               | 55.00/ 97.0 %                                                                  | 25.00/99.8%                                                                    |
| Refinement method                                   | Full-matrix least-squares on <i>F</i> <sup>2</sup>                             |                                                                                |
| Data / restraints / parameters                      | 13060 /79/815                                                                  | 20885 /46 /797                                                                 |
| Goodness-of-fit on <i>F</i> <sup>2</sup>            | 1.183                                                                          | 1.020                                                                          |
| Final <i>R</i> indices [ <i>I</i> > 2σ( <i>I</i> )] | <i>R</i> <sub>1</sub> = 0.0795,<br><i>wR</i> <sub>2</sub> = 0.2457             | <i>R</i> <sub>1</sub> = 0.0941,<br><i>wR</i> <sub>2</sub> = 0.1863             |

---

|                                                  |                                    |                                    |
|--------------------------------------------------|------------------------------------|------------------------------------|
| <i>R</i> indices (all data)                      | $R_1 = 0.0919,$<br>$wR_2 = 0.2527$ | $R_1 = 0.2133,$<br>$wR_2 = 0.2130$ |
| Absolute structure parameter                     | 0.138(14)                          | -0.27(4)                           |
| Largest diff. peak and hole (e.Å <sup>-3</sup> ) | 0.854 and -1.230                   | 0.684 and -0.501                   |

---

**Supplementary Table 9. X-ray crystallography of Me<sub>2</sub>L-Mg and Me<sub>2</sub>L-Mn.**

| Compound                                            | <b>Me<sub>2</sub>L-Mg</b>                                                                                        | <b>Me<sub>2</sub>L-Mn</b>                                                                                      |
|-----------------------------------------------------|------------------------------------------------------------------------------------------------------------------|----------------------------------------------------------------------------------------------------------------|
| Empirical formula                                   | C <sub>242</sub> H <sub>240</sub> Mg <sub>3</sub> O <sub>59</sub> P <sub>6</sub>                                 | C <sub>242</sub> H <sub>240</sub> Mn <sub>3</sub> O <sub>59</sub> P <sub>6</sub>                               |
| Formula weight                                      | 4327.06                                                                                                          | 4442.97                                                                                                        |
| Temperature (K)                                     | 173.0                                                                                                            | 173.0                                                                                                          |
| Wavelength (Å)                                      | 1.54178                                                                                                          | 1.54178                                                                                                        |
| Crystal system                                      | Orthorhombic                                                                                                     | Orthorhombic                                                                                                   |
| Space group                                         | <i>P</i> 2 <sub>1</sub> 2 <sub>1</sub> 2 <sub>1</sub>                                                            | <i>P</i> 2 <sub>1</sub> 2 <sub>1</sub> 2 <sub>1</sub>                                                          |
| Unit cell dimensions                                | <i>a</i> = 21.9287(12)<br><i>b</i> = 34.0887(18)<br><i>c</i> = 37.283(2)<br>$\alpha = \beta = \gamma = 90^\circ$ | <i>a</i> = 22.1113(18)<br><i>b</i> = 33.662(3)<br><i>c</i> = 37.400(3)<br>$\alpha = \beta = \gamma = 90^\circ$ |
| Volume (Å <sup>3</sup> )                            | 27870(3)                                                                                                         | 27837(4)                                                                                                       |
| <i>Z</i>                                            | 4                                                                                                                | 4                                                                                                              |
| Density (calcd. mg/m <sup>3</sup> )                 | 1.031                                                                                                            | 1.060                                                                                                          |
| Absorption coeff. (mm <sup>-1</sup> )               | 0.973                                                                                                            | 1.968                                                                                                          |
| <i>F</i> (000)                                      | 9112                                                                                                             | 9316                                                                                                           |
| $\theta$ range data collection                      | 2.337 ~ 59.218                                                                                                   | 2.321 ~ 52.873                                                                                                 |
| Limiting indices                                    | -24 ≤ <i>h</i> ≤ 21,<br>-37 ≤ <i>k</i> ≤ 37,<br>-38 ≤ <i>l</i> ≤ 41                                              | -22 ≤ <i>h</i> ≤ 15,<br>-34 ≤ <i>k</i> ≤ 34,<br>-36 ≤ <i>l</i> ≤ 38                                            |
| Reflections collected                               | 135669                                                                                                           | 78889                                                                                                          |
| Independent reflections                             | 39778 ( <i>R</i> <sub>int</sub> = 0.0840)                                                                        | 31396 ( <i>R</i> <sub>int</sub> = 0.0568)                                                                      |
| Completeness to theta                               | 67.679/79.6 %                                                                                                    | 67.679/63.8%                                                                                                   |
| Refinement method                                   | Full-matrix least-squares on <i>F</i> <sup>2</sup>                                                               |                                                                                                                |
| Data / restraints / parameters                      | 39778/2750/2500                                                                                                  | 31396/4462/2580                                                                                                |
| Goodness-of-fit on <i>F</i> <sup>2</sup>            | 1.244                                                                                                            | 1.623                                                                                                          |
| Final <i>R</i> indices [ <i>I</i> > 2σ( <i>I</i> )] | <i>R</i> <sub>1</sub> = 0.1313,<br><i>wR</i> <sub>2</sub> = 0.3150                                               | <i>R</i> <sub>1</sub> = 0.1394,<br><i>wR</i> <sub>2</sub> = 0.3632                                             |

---

|                                                     |                                    |                                    |
|-----------------------------------------------------|------------------------------------|------------------------------------|
| <i>R</i> indices (all data)                         | $R_1 = 0.1542,$<br>$wR_2 = 0.3439$ | $R_1 = 0.1489,$<br>$wR_2 = 0.3769$ |
| Absolute structure parameter                        | 0.104(14)                          | 0.112(4)                           |
| Largest diff. peak and hole ( $e.\text{\AA}^{-3}$ ) | 1.488 and -0.552                   | 1.103 and -0.688                   |

---

**Supplementary Table 10. Selected bond lengths [Å] and angles [°] for 1-Cr.**

---

|                      |            |
|----------------------|------------|
| Cr(1)-O(9)#1         | 1.917(4)   |
| Cr(1)-O(5)           | 1.961(5)   |
| Cr(1)-O(15)#2        | 1.983(5)   |
| Cr(1)-O(17)          | 2.000(6)   |
| Cr(2)-O(6)           | 2.267(5)   |
| Cr(2)-O(14)          | 2.277(4)   |
| Cr(2)-O(2)#3         | 2.324(5)   |
| Cr(2)-O(16)#2        | 2.332(5)   |
| Cr(2)-O(8)#4         | 2.365(4)   |
| Cr(2)-O(10)#1        | 2.369(4)   |
| Cr(3)-O(7)#4         | 1.911(4)   |
| Cr(3)-O(18)          | 1.947(6)   |
| Cr(3)-O(1)#3         | 1.954(5)   |
| Cr(3)-O(13)          | 1.959(6)   |
|                      |            |
| O(9)#1-Cr(1)-O(5)    | 113.2(2)   |
| O(9)#1-Cr(1)-O(15)#2 | 128.8(3)   |
| O(5)-Cr(1)-O(15)#2   | 111.5(3)   |
| O(9)#1-Cr(1)-O(17)   | 100.8(2)   |
| O(5)-Cr(1)-O(17)     | 100.9(3)   |
| O(15)#2-Cr(1)-O(17)  | 94.0(3)    |
| O(6)-Cr(2)-O(14)     | 119.4(2)   |
| O(6)-Cr(2)-O(2)#3    | 152.67(19) |
| O(14)-Cr(2)-O(2)#3   | 82.6(2)    |
| O(6)-Cr(2)-O(16)#2   | 81.34(19)  |
| O(14)-Cr(2)-O(16)#2  | 152.55(19) |
| O(2)#3-Cr(2)-O(16)#2 | 84.08(19)  |
| O(6)-Cr(2)-O(8)#4    | 81.36(16)  |
| O(14)-Cr(2)-O(8)#4   | 90.92(17)  |

---



---

|                       |            |
|-----------------------|------------|
| O(2)#3-Cr(2)-O(8)#4   | 82.50(16)  |
| O(16)#2-Cr(2)-O(8)#4  | 111.03(17) |
| O(6)-Cr(2)-O(10)#1    | 88.52(17)  |
| O(14)-Cr(2)-O(10)#1   | 84.47(16)  |
| O(2)#3-Cr(2)-O(10)#1  | 110.88(17) |
| O(16)#2-Cr(2)-O(10)#1 | 77.99(15)  |
| O(8)#4-Cr(2)-O(10)#1  | 165.04(17) |
| O(7)#4-Cr(3)-O(18)    | 109.6(2)   |
| O(7)#4-Cr(3)-O(1)#3   | 123.1(2)   |
| O(18)-Cr(3)-O(1)#3    | 95.4(3)    |
| O(7)#4-Cr(3)-O(13)    | 110.2(2)   |
| O(18)-Cr(3)-O(13)     | 100.5(3)   |
| O(1)#3-Cr(3)-O(13)    | 114.3(2)   |

---

Symmetry transformations used to generate equivalent atoms:

#1  $-x+1, y, -z+1/2$     #2  $x+1/2, -y+1/2, -z$     #3  $-x+3/2, y+1/2, -z+1/2$   
 #4  $x, -y, -z$     #5  $-x+3/2, y-1/2, -z+1/2$     #6  $x-1/2, -y+1/2, -z$

**Supplementary Table 11. Selected bond lengths [Å] and angles [°] for 1-Mn.**

---

|                      |           |
|----------------------|-----------|
| Mn(1)-O(9)#1         | 1.927(5)  |
| Mn(1)-O(5)           | 1.957(6)  |
| Mn(1)-O(15)#2        | 1.979(5)  |
| Mn(1)-O(17)          | 2.040(6)  |
| Mn(2)-O(6)           | 2.290(5)  |
| Mn(2)-O(14)          | 2.292(5)  |
| Mn(2)-O(2)#3         | 2.299(5)  |
| Mn(2)-O(16)#2        | 2.326(5)  |
| Mn(2)-O(10)#1        | 2.350(4)  |
| Mn(2)-O(8)#4         | 2.360(5)  |
| Mn(3)-O(7)#4         | 1.888(5)  |
| Mn(3)-O(1)#3         | 1.932(6)  |
| Mn(3)-O(13)          | 1.935(6)  |
| Mn(3)-O(18)          | 1.988(6)  |
|                      |           |
| O(9)#1-Mn(1)-O(5)    | 113.3(2)  |
| O(9)#1-Mn(1)-O(15)#2 | 127.5(3)  |
| O(5)-Mn(1)-O(15)#2   | 111.9(3)  |
| O(9)#1-Mn(1)-O(17)   | 101.3(2)  |
| O(5)-Mn(1)-O(17)     | 100.3(3)  |
| O(15)#2-Mn(1)-O(17)  | 95.6(3)   |
| O(6)-Mn(2)-O(14)     | 117.5(2)  |
| O(6)-Mn(2)-O(2)#3    | 153.8(2)  |
| O(14)-Mn(2)-O(2)#3   | 83.1(2)   |
| O(6)-Mn(2)-O(16)#2   | 81.9(2)   |
| O(14)-Mn(2)-O(16)#2  | 155.0(2)  |
| O(2)#3-Mn(2)-O(16)#2 | 83.9(2)   |
| O(6)-Mn(2)-O(10)#1   | 88.81(19) |
| O(14)-Mn(2)-O(10)#1  | 85.39(17) |

---

---

|                       |            |
|-----------------------|------------|
| O(2)#3-Mn(2)-O(10)#1  | 109.95(19) |
| O(16)#2-Mn(2)-O(10)#1 | 79.17(17)  |
| O(6)-Mn(2)-O(8)#4     | 81.39(18)  |
| O(14)-Mn(2)-O(8)#4    | 89.52(18)  |
| O(2)#3-Mn(2)-O(8)#4   | 82.95(18)  |
| O(16)#2-Mn(2)-O(8)#4  | 109.90(19) |
| O(10)#1-Mn(2)-O(8)#4  | 165.37(19) |
| O(7)#4-Mn(3)-O(1)#3   | 125.6(3)   |
| O(7)#4-Mn(3)-O(13)    | 110.3(2)   |
| O(1)#3-Mn(3)-O(13)    | 114.0(3)   |
| O(7)#4-Mn(3)-O(18)    | 100.7(3)   |
| O(1)#3-Mn(3)-O(18)    | 98.5(4)    |
| O(13)-Mn(3)-O(18)     | 103.0(4)   |

---

Symmetry transformations used to generate equivalent atoms:

#1  $-x, y, -z+3/2$     #2  $x+1/2, -y+1/2, -z+2$     #3  $-x+1/2, y-1/2, -z+3/2$   
 #4  $x, -y+1, -z+2$     #5  $-x+1/2, y+1/2, -z+3/2$     #6  $x-1/2, -y+1/2, -z+2$

**Supplementary Table 12. Selected bond lengths [Å] and angles [°] for 1-Ga.**

---

|                      |            |
|----------------------|------------|
| Ga(1)-O(5)           | 1.939(5)   |
| Ga(1)-O(9)#1         | 1.947(4)   |
| Ga(1)-O(15)#2        | 1.993(4)   |
| Ga(1)-O(17)          | 2.028(5)   |
| Ga(2)-O(14)          | 2.257(4)   |
| Ga(2)-O(6)           | 2.292(4)   |
| Ga(2)-O(10)#1        | 2.339(4)   |
| Ga(2)-O(8)#3         | 2.339(4)   |
| Ga(2)-O(2)#4         | 2.342(5)   |
| Ga(2)-O(16)#2        | 2.347(5)   |
| Ga(3)-O(7)#3         | 1.952(4)   |
| Ga(3)-O(18)          | 1.956(4)   |
| Ga(3)-O(1)#4         | 1.958(5)   |
| Ga(3)-O(13)          | 1.979(5)   |
|                      |            |
| O(5)-Ga(1)-O(9)#1    | 111.3(2)   |
| O(5)-Ga(1)-O(15)#2   | 114.5(3)   |
| O(9)#1-Ga(1)-O(15)#2 | 127.8(3)   |
| O(5)-Ga(1)-O(17)     | 102.2(3)   |
| O(9)#1-Ga(1)-O(17)   | 101.8(2)   |
| O(15)#2-Ga(1)-O(17)  | 91.9(2)    |
| O(14)-Ga(2)-O(6)     | 120.8(2)   |
| O(14)-Ga(2)-O(10)#1  | 85.67(15)  |
| O(6)-Ga(2)-O(10)#1   | 88.51(17)  |
| O(14)-Ga(2)-O(8)#3   | 88.92(17)  |
| O(6)-Ga(2)-O(8)#3    | 83.20(15)  |
| O(10)#1-Ga(2)-O(8)#3 | 166.01(19) |
| O(14)-Ga(2)-O(2)#4   | 81.55(19)  |
| O(6)-Ga(2)-O(2)#4    | 153.29(18) |

---

---

|                       |            |
|-----------------------|------------|
| O(10)#1-Ga(2)-O(2)#4  | 109.00(18) |
| O(8)#3-Ga(2)-O(2)#4   | 82.87(16)  |
| O(14)-Ga(2)-O(16)#2   | 153.10(19) |
| O(6)-Ga(2)-O(16)#2    | 81.57(19)  |
| O(10)#1-Ga(2)-O(16)#2 | 79.87(16)  |
| O(8)#3-Ga(2)-O(16)#2  | 109.85(18) |
| O(2)#4-Ga(2)-O(16)#2  | 81.91(18)  |
| O(7)#3-Ga(3)-O(18)    | 105.5(2)   |
| O(7)#3-Ga(3)-O(1)#4   | 125.8(2)   |
| O(18)-Ga(3)-O(1)#4    | 97.7(2)    |
| O(7)#3-Ga(3)-O(13)    | 110.6(2)   |
| O(18)-Ga(3)-O(13)     | 100.7(3)   |
| O(1)#4-Ga(3)-O(13)    | 112.1(2)   |

---

Symmetry transformations used to generate equivalent atoms:

#1  $-x+1, y, -z+1/2$     #2  $x+1/2, -y+1/2, -z$     #3  $x, -y, -z$   
 #4  $-x+3/2, y+1/2, -z+1/2$     #5  $-x+3/2, y-1/2, -z+1/2$     #6  $x-1/2, -y+1/2, -z$

**Supplementary Table 13. Selected bond lengths [Å] and angles [°] for 1-Zr.**

---

|                      |            |
|----------------------|------------|
| Zr(1)-O(9)#1         | 1.930(4)   |
| Zr(1)-O(5)           | 1.939(6)   |
| Zr(1)-O(17)          | 1.999(5)   |
| Zr(1)-O(15)#2        | 2.008(6)   |
| Zr(2)-O(14)          | 2.271(4)   |
| Zr(2)-O(6)           | 2.274(4)   |
| Zr(2)-O(2)#3         | 2.292(4)   |
| Zr(2)-O(16)#2        | 2.349(5)   |
| Zr(2)-O(10)#1        | 2.353(4)   |
| Zr(2)-O(8)#4         | 2.365(4)   |
| Zr(3)-O(7)#4         | 1.918(4)   |
| Zr(3)-O(13)          | 1.953(6)   |
| Zr(3)-O(1)#3         | 1.965(5)   |
| Zr(3)-O(18)          | 1.975(6)   |
| O(9)#1-Zr(1)-O(5)    | 113.1(2)   |
| O(9)#1-Zr(1)-O(17)   | 100.9(2)   |
| O(5)-Zr(1)-O(17)     | 102.3(3)   |
| O(9)#1-Zr(1)-O(15)#2 | 127.4(3)   |
| O(5)-Zr(1)-O(15)#2   | 112.3(3)   |
| O(17)-Zr(1)-O(15)#2  | 94.1(3)    |
| O(14)-Zr(2)-O(6)     | 116.87(18) |
| O(14)-Zr(2)-O(2)#3   | 83.26(19)  |
| O(6)-Zr(2)-O(2)#3    | 153.54(19) |
| O(14)-Zr(2)-O(16)#2  | 155.38(18) |
| O(6)-Zr(2)-O(16)#2   | 82.07(19)  |
| O(2)#3-Zr(2)-O(16)#2 | 84.6(2)    |
| O(14)-Zr(2)-O(10)#1  | 86.00(15)  |
| O(6)-Zr(2)-O(10)#1   | 88.76(16)  |
| O(2)#3-Zr(2)-O(10)#1 | 110.79(17) |

---

---

|                       |            |
|-----------------------|------------|
| O(16)#2-Zr(2)-O(10)#1 | 78.46(16)  |
| O(14)-Zr(2)-O(8)#4    | 88.82(16)  |
| O(6)-Zr(2)-O(8)#4     | 80.86(15)  |
| O(2)#3-Zr(2)-O(8)#4   | 82.71(17)  |
| O(16)#2-Zr(2)-O(8)#4  | 110.74(17) |
| O(10)#1-Zr(2)-O(8)#4  | 164.80(16) |
| O(7)#4-Zr(3)-O(13)    | 110.1(2)   |
| O(7)#4-Zr(3)-O(1)#3   | 124.3(3)   |
| O(13)-Zr(3)-O(1)#3    | 113.2(3)   |
| O(7)#4-Zr(3)-O(18)    | 108.3(2)   |
| O(13)-Zr(3)-O(18)     | 103.8(3)   |
| O(1)#3-Zr(3)-O(18)    | 93.9(3)    |

---

Symmetry transformations used to generate equivalent atoms:

#1  $-x+1, y, -z+1/2$     #2  $x+1/2, -y+1/2, -z$     #3  $-x+3/2, y+1/2, -z+1/2$   
#4  $x, -y, -z$     #5  $-x+3/2, y-1/2, -z+1/2$     #6  $x-1/2, -y+1/2, -z$

**Supplementary Table 14. Selected bond lengths [Å] and angles [°] for 1-Ti.**

---

|                      |          |
|----------------------|----------|
| Ti(1)-O(5)           | 1.874(8) |
| Ti(1)-O(9)#1         | 1.945(8) |
| Ti(1)-O(17)          | 2.023(6) |
| Ti(1)-O(15)#2        | 2.057(7) |
| Ti(2)-O(14)          | 2.215(8) |
| Ti(2)-O(6)           | 2.280(6) |
| Ti(2)-O(10)#1        | 2.316(6) |
| Ti(2)-O(2)#3         | 2.326(8) |
| Ti(2)-O(8)#4         | 2.350(6) |
| Ti(2)-O(16)#2        | 2.370(9) |
| Ti(3)-O(7)#4         | 1.897(8) |
| Ti(3)-O(13)          | 1.915(8) |
| Ti(3)-O(1)#3         | 1.926(7) |
| Ti(3)-O(18)          | 1.970(6) |
| <br>                 |          |
| O(5)-Ti(1)-O(9)#1    | 112.7(4) |
| O(5)-Ti(1)-O(17)     | 101.3(3) |
| O(9)#1-Ti(1)-O(17)   | 101.0(3) |
| O(5)-Ti(1)-O(15)#2   | 114.4(4) |
| O(9)#1-Ti(1)-O(15)#2 | 127.2(4) |
| O(17)-Ti(1)-O(15)#2  | 92.1(3)  |
| O(14)-Ti(2)-O(6)     | 120.1(3) |
| O(14)-Ti(2)-O(10)#1  | 86.4(2)  |
| O(6)-Ti(2)-O(10)#1   | 89.7(2)  |
| O(14)-Ti(2)-O(2)#3   | 83.7(3)  |
| O(6)-Ti(2)-O(2)#3    | 151.8(3) |
| O(10)#1-Ti(2)-O(2)#3 | 107.9(2) |
| O(14)-Ti(2)-O(8)#4   | 91.0(3)  |
| O(6)-Ti(2)-O(8)#4    | 81.1(2)  |

---



---

|                      |          |
|----------------------|----------|
| O(10)#1-Ti(2)-O(8)#4 | 167.7(3) |
| O(2)#3-Ti(2)-O(8)#4  | 83.8(2)  |
| O(7)#4-Ti(3)-O(13)   | 112.2(3) |
| O(7)#4-Ti(3)-O(1)#3  | 126.8(4) |
| O(13)-Ti(3)-O(1)#3   | 110.2(4) |
| O(7)#4-Ti(3)-O(18)   | 107.6(3) |
| O(13)-Ti(3)-O(18)    | 96.4(4)  |
| O(1)#3-Ti(3)-O(18)   | 97.9(3)  |

---

Symmetry transformations used to generate equivalent atoms:

#1  $-x+1, y, -z+1/2$     #2  $x+1/2, -y+1/2, -z$     #3  $-x+3/2, y+1/2, -z+1/2$   
 #4  $x, -y, -z$     #5  $-x+3/2, y-1/2, -z+1/2$     #6  $x-1/2, -y+1/2, -z$

**Supplementary Table 15. Selected bond lengths [Å] and angles [°] for Me<sub>2</sub>L-Mg.**

---

|                   |           |
|-------------------|-----------|
| Mg(1)-O(4)        | 2.000(8)  |
| Mg(1)-O(12)       | 2.035(9)  |
| Mg(1)-O(25)       | 1.935(9)  |
| Mg(1)-O(29)       | 2.086(9)  |
| Mg(1)-O(45)       | 2.038(11) |
| Mg(2)-O(7)        | 2.019(9)  |
| Mg(2)-O(13)       | 1.947(9)  |
| Mg(2)-O(20)       | 1.993(9)  |
| Mg(2)-O(31)       | 2.070(9)  |
| Mg(2)-O(37)       | 2.079(10) |
| Mg(3)-O(2)        | 2.007(9)  |
| Mg(3)-O(8)        | 2.127(8)  |
| Mg(3)-O(17)       | 2.076(8)  |
| Mg(3)-O(19)       | 2.109(9)  |
| Mg(3)-O(23)       | 2.001(9)  |
| Mg(3)-O(24)       | 2.144(9)  |
|                   |           |
| O(4)-Mg(1)-O(12)  | 150.7(4)  |
| O(4)-Mg(1)-O(29)  | 86.4(3)   |
| O(4)-Mg(1)-O(45)  | 85.2(4)   |
| O(12)-Mg(1)-O(29) | 90.5(4)   |
| O(12)-Mg(1)-O(45) | 83.7(4)   |
| O(25)-Mg(1)-O(4)  | 109.8(4)  |
| O(25)-Mg(1)-O(12) | 99.5(4)   |
| O(25)-Mg(1)-O(29) | 97.9(4)   |
| O(25)-Mg(1)-O(45) | 110.8(6)  |
| O(45)-Mg(1)-O(29) | 151.3(6)  |
| O(7)-Mg(2)-O(31)  | 91.5(3)   |
| O(7)-Mg(2)-O(37)  | 82.7(4)   |

---

---

|                   |          |
|-------------------|----------|
| O(13)-Mg(2)-O(7)  | 101.3(4) |
| O(13)-Mg(2)-O(20) | 105.6(4) |
| O(13)-Mg(2)-O(31) | 100.2(4) |
| O(13)-Mg(2)-O(37) | 115.5(4) |
| O(20)-Mg(2)-O(7)  | 152.8(4) |
| O(20)-Mg(2)-O(31) | 88.2(3)  |
| O(20)-Mg(2)-O(37) | 81.8(4)  |
| O(31)-Mg(2)-O(37) | 144.3(4) |
| O(2)-Mg(3)-O(8)   | 87.6(3)  |
| O(2)-Mg(3)-O(17)  | 91.3(3)  |
| O(2)-Mg(3)-O(19)  | 93.3(3)  |
| O(2)-Mg(3)-O(24)  | 88.4(3)  |
| O(8)-Mg(3)-O(24)  | 94.3(3)  |
| O(17)-Mg(3)-O(8)  | 87.4(3)  |
| O(17)-Mg(3)-O(19) | 91.6(3)  |
| O(17)-Mg(3)-O(24) | 178.3(4) |
| O(19)-Mg(3)-O(8)  | 178.7(4) |
| O(19)-Mg(3)-O(24) | 86.7(3)  |
| O(23)-Mg(3)-O(2)  | 171.2(4) |
| O(23)-Mg(3)-O(8)  | 88.5(3)  |
| O(23)-Mg(3)-O(17) | 96.4(4)  |
| O(23)-Mg(3)-O(19) | 90.7(3)  |
| O(23)-Mg(3)-O(24) | 84.0(3)  |

---

**Supplementary Table 16. Selected bond lengths [Å] and angles [°] for Me<sub>2</sub>L-Mn.**

---

|                   |           |
|-------------------|-----------|
| Mn(1)-O(6)        | 2.095(9)  |
| Mn(1)-O(11)       | 2.027(11) |
| Mn(1)-O(27)       | 2.187(11) |
| Mn(1)-O(29)       | 2.070(11) |
| Mn(1)-O(32)       | 2.187(13) |
| Mn(2)-O(8)        | 2.254(9)  |
| Mn(2)-O(9)        | 2.113(11) |
| Mn(2)-O(10)       | 2.155(9)  |
| Mn(2)-O(19)       | 2.251(9)  |
| Mn(2)-O(22)       | 2.079(12) |
| Mn(2)-O(23)       | 2.217(10) |
| Mn(3)-O(4)        | 2.087(10) |
| Mn(3)-O(17)       | 2.206(11) |
| Mn(3)-O(21)       | 2.056(11) |
| Mn(3)-O(24)       | 2.113(10) |
| Mn(3)-O(55)       | 2.160(15) |
|                   |           |
| O(6)-Mn(1)-O(27)  | 93.3(4)   |
| O(6)-Mn(1)-O(32)  | 80.0(5)   |
| O(11)-Mn(1)-O(6)  | 101.6(4)  |
| O(11)-Mn(1)-O(27) | 98.3(4)   |
| O(11)-Mn(1)-O(29) | 108.8(5)  |
| O(11)-Mn(1)-O(32) | 117.1(6)  |
| O(29)-Mn(1)-O(6)  | 149.1(5)  |
| O(29)-Mn(1)-O(27) | 87.3(4)   |
| O(29)-Mn(1)-O(32) | 81.8(5)   |
| O(32)-Mn(1)-O(27) | 144.7(5)  |
| O(9)-Mn(2)-O(8)   | 86.1(4)   |
| O(9)-Mn(2)-O(10)  | 91.7(4)   |

---

---

|                   |          |
|-------------------|----------|
| O(9)-Mn(2)-O(19)  | 86.2(4)  |
| O(9)-Mn(2)-O(23)  | 93.3(4)  |
| O(10)-Mn(2)-O(8)  | 177.7(5) |
| O(10)-Mn(2)-O(19) | 85.5(4)  |
| O(10)-Mn(2)-O(23) | 95.1(4)  |
| O(19)-Mn(2)-O(8)  | 94.2(4)  |
| O(22)-Mn(2)-O(8)  | 84.5(4)  |
| O(22)-Mn(2)-O(9)  | 168.5(4) |
| O(22)-Mn(2)-O(10) | 97.7(4)  |
| O(22)-Mn(2)-O(19) | 87.8(4)  |
| O(22)-Mn(2)-O(23) | 92.6(4)  |
| O(23)-Mn(2)-O(8)  | 85.1(4)  |
| O(23)-Mn(2)-O(19) | 179.2(4) |
| O(4)-Mn(3)-O(17)  | 86.2(4)  |
| O(4)-Mn(3)-O(24)  | 144.6(4) |
| O(4)-Mn(3)-O(55)  | 84.6(5)  |
| O(21)-Mn(3)-O(4)  | 113.8(4) |
| O(21)-Mn(3)-O(17) | 94.9(4)  |
| O(21)-Mn(3)-O(24) | 101.6(4) |
| O(21)-Mn(3)-O(55) | 102.4(6) |
| O(24)-Mn(3)-O(17) | 91.3(4)  |
| O(24)-Mn(3)-O(55) | 87.6(6)  |
| O(55)-Mn(3)-O(17) | 162.6(6) |

---

**(S)-1-Phenyl-but-3-en-1-ol:**

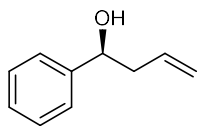

Following the general procedure for the allylation of aldehydes, the title compound was obtained in 99 % yield with spectral properties reported in literature. Enantiomeric excess was determined by HPLC with a chiralcel OD-H column: hexane/iPrOH = 90/10; flow rate = 0.5 mL/min;  $t_{\text{minor}} = 11.27$  min,  $t_{\text{major}} = 11.85$  min; ee = 83%.  $^1\text{H}$  NMR (400 MHz,  $\text{CDCl}_3$ )  $\delta$ : 2.05 (br s, 1H), 2.49-2.54 (m, 2H), 4.72-4.74 (m, 1H), 4.74-5.19 (m, 2H), 5.76-5.87 (m, 1H), 7.26-7.36 (m, 5H).

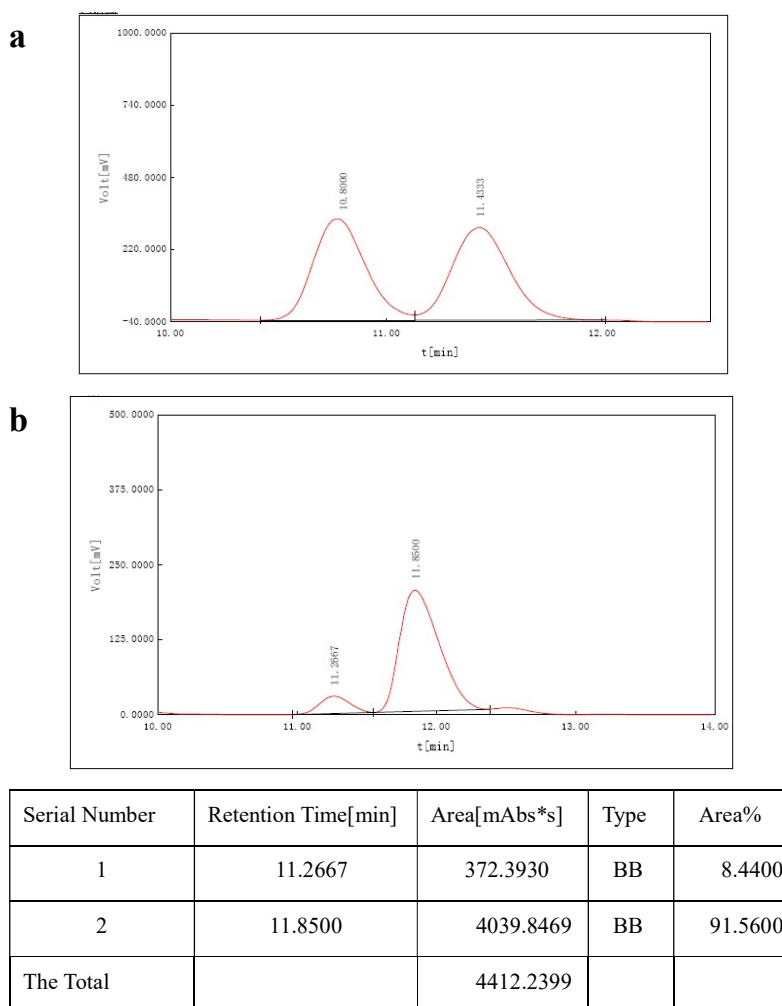

**Supplementary Figure 63. HPLC spectra for (S)-1-Phenyl-but-3-en-1-ol. a,** Racemic standard. **b,** After reaction. **c,** The detail of integration

**(S)-1-(4-Chloro-phenyl)-but-3-en-1-ol:**

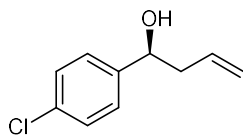

Following the general procedure for the allylation of aldehydes, the title compound was obtained in 99 % yield with spectral properties reported in literature. Enantiomeric excess was determined by HPLC with a chiralcel AD-H column: hexane/iPrOH = 98/2; flow rate = 1.0 mL/min;  $t_{\text{minor}} = 15.88$  min,  $t_{\text{major}} = 16.80$  min; ee = 92%.  $^1\text{H}$  NMR (400 MHz,  $\text{CDCl}_3$ )  $\delta$ : 2.07 (br s, 1H), 2.45-2.51 (m, 2H), 4.70-4.73 (m, 1H), 5.14-5.18 (m, 2H), 5.72-5.83 (m, 1H), 7.28-7.33 (m, 4H).

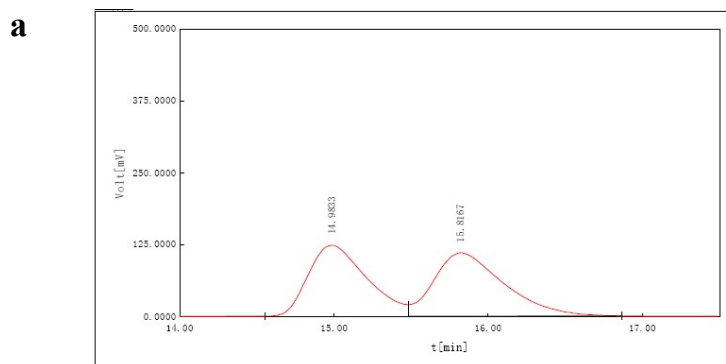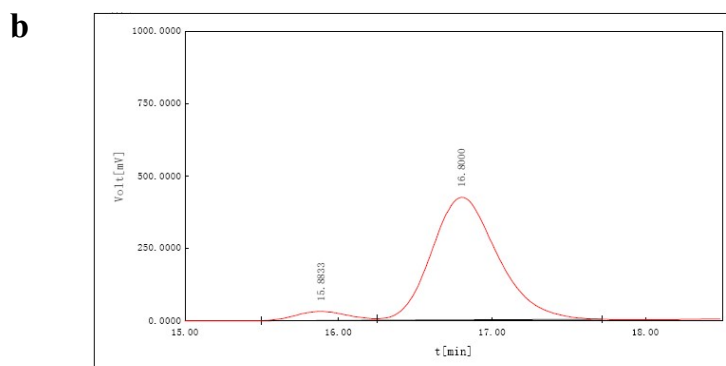

**c**

| Serial Number | Retention Time[min] | Area[mAbs*s] | Type | Area%   |
|---------------|---------------------|--------------|------|---------|
| 1             | 15.8833             | 565.1163     | BB   | 4.2121  |
| 2             | 16.8000             | 12851.3808   | BB   | 95.7879 |
| The Total     |                     | 13416.4971   |      |         |

**Supplementary Figure 64. HPLC spectra for (S)-1-(4-Chloro-phenyl)-but-3-en-1-ol. a, Racemic standard. b, After reaction. c, The detail of integration**

**(S)-1-(4-Bromo-phenyl)-but-3-en-1-ol:**

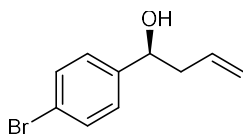

Following the general procedure for the allylation of aldehydes, the title compound was obtained in 99 % yield with spectral properties reported in literature. Enantiomeric excess was determined by HPLC with a chiralcel OJ-H column: hexane/iPrOH = 95/5; flow rate = 0.4 mL/min;  $t_{\text{major}} = 25.50$  min,  $t_{\text{minor}} = 28.00$  min; ee = 90%.  $^1\text{H}$  NMR (400 MHz,  $\text{CDCl}_3$ )  $\delta$ : 2.07 (br s, 1H), 2.44-2.50 (m, 2H), 4.69-4.72 (m, 1H), 5.14-5.18 (m, 2H), 5.72-5.83 (m, 1H), 7.23-7.48 (m, 4H).

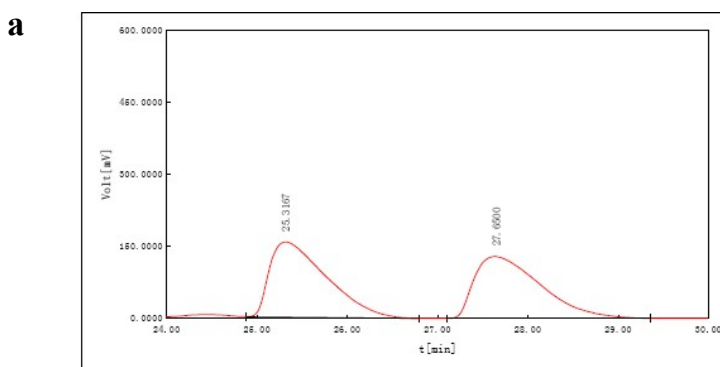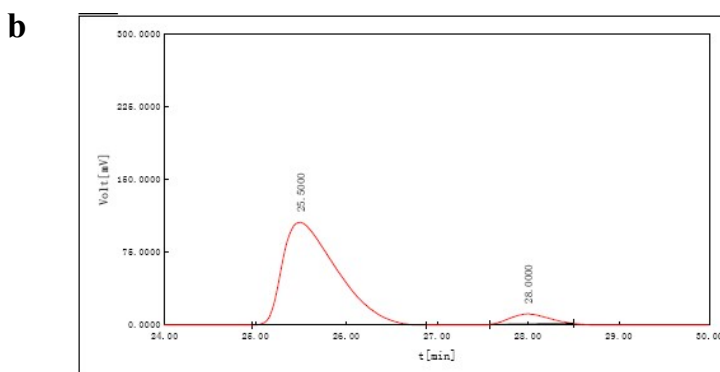

**c**

| Serial Number | Retention Time[min] | Area[mAbs*s] | Type | Area%   |
|---------------|---------------------|--------------|------|---------|
| 1             | 25.5000             | 4489.2434    | BB   | 94.7772 |
| 2             | 28.0000             | 247.3846     | BB   | 5.2228  |
| The Total     |                     | 4736.6280    |      |         |

**Supplementary Figure 65. HPLC spectra for (S)-1-(4-Bromo-phenyl)-but-3-en-1-ol a, Racemic standard. b, After reaction. c, The detail of integration**



**(S)-1-(4-Nitro-phenyl)-but-3-en-1-ol:**

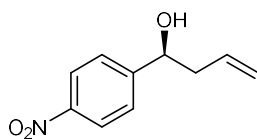

Following the general procedure for the allylation of aldehydes, the title compound was obtained in 98% yield with spectral properties reported in literature. Enantiomeric excess was determined by HPLC with a chiralcel AS-H column: hexane/iPrOH = 97/3; flow rate = 0.5 mL/min;  $t_{\text{minor}} = 72.63$  min,  $t_{\text{major}} = 77.30$  min; ee = 96%.  $^1\text{H NMR}$  (400 MHz,  $\text{CDCl}_3$ )  $\delta$ : 2.23 (br s, 1H), 2.41-2.58 (m, 2H), 4.84 (m, 1H), 4.85-5.21 (m, 2H), 5.73-5.84 (m, 1H), 7.53 (d,  $J = 8.8$  Hz, 2H), 8.20 (d,  $J = 8.8$  Hz, 2H).

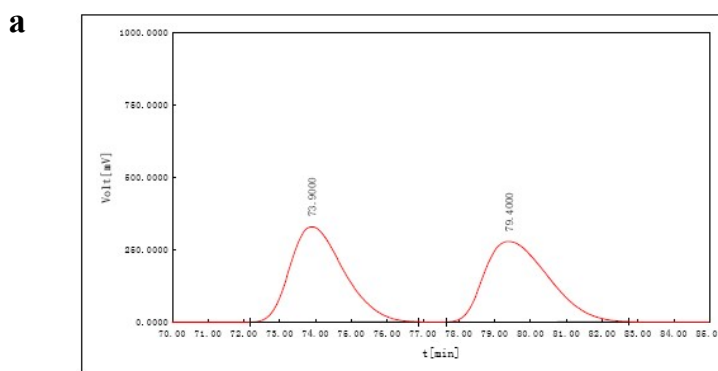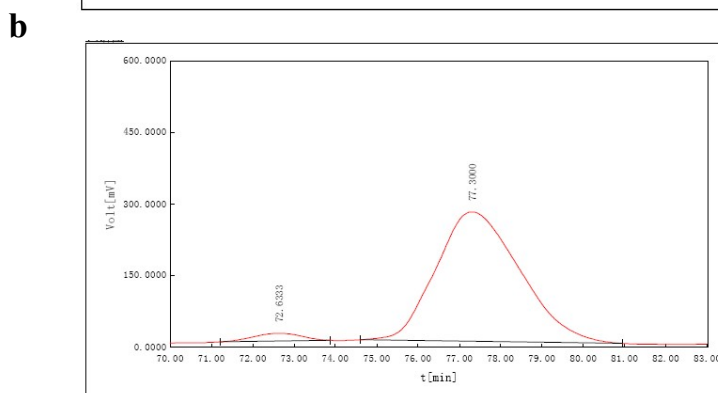

**c**

| Serial Number | Retention Time[min] | Area[mAbs*s] | Type | Area%   |
|---------------|---------------------|--------------|------|---------|
| 1             | 72.6333             | 877.2764     | BB   | 2.2327  |
| 2             | 77.3000             | 38414.9004   | BB   | 97.7673 |
| The Total     |                     | 39292.1768   |      |         |

**Supplementary Figure 66. HPLC spectra for (S)-1-(4-Nitro-phenyl)-but-3-en-1-ol**  
**a**, Racemic standard. **b**, After reaction. **c**, The detail of integration.

**(S)-1-(4-Methyl-phenyl)-but-3-en-1-ol:**

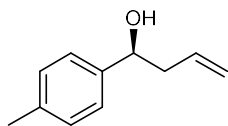

Following the general procedure for the allylation of aldehydes, the title compound was obtained in 98% yield with spectral properties reported in literature. Enantiomeric excess was determined by HPLC with a chiralcel OD-H column: hexane/*i*PrOH = 99/1; flow rate = 1.0 mL/min;  $t_{\text{minor}} = 19.95$  min,  $t_{\text{major}} = 21.35$  min; ee = 84%.  $^1\text{H}$  NMR (400 MHz,  $\text{CDCl}_3$ )  $\delta$ : 2.00 (br s, 1H), 2.35 (s, 3H), 2.50-2.52 (m, 2H), 4.70 (m, 1H), 5.12-5.19 (m, 2H), 5.76-5.86 (m, 1H), 7.16 (d,  $J = 8.8$  Hz, 2H), 7.25 (d,  $J = 8.8$  Hz, 2H).

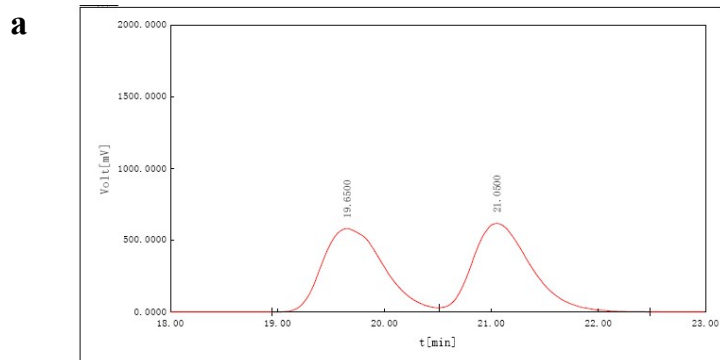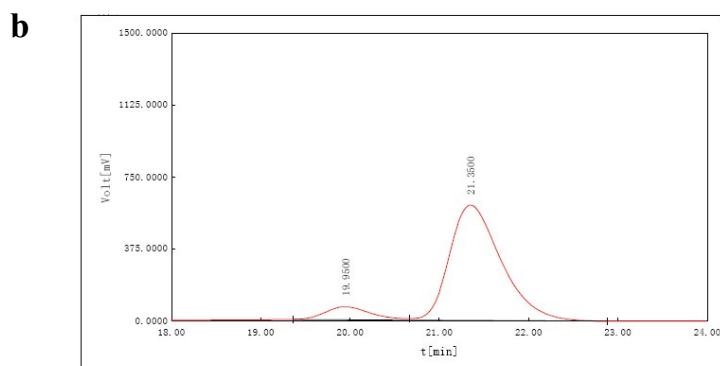

**c**

| Serial Number | Retention Time[min] | Area[mAbs*s] | Type | Area%   |
|---------------|---------------------|--------------|------|---------|
| 1             | 19.9500             | 2192.7060    | BB   | 8.2506  |
| 2             | 21.3500             | 24383.6154   | BB   | 91.7494 |
| The Total     |                     | 26576.3217   |      |         |

**Supplementary Figure 67. HPLC spectra for (S)-1-(4-Methyl-phenyl)-but-3-en-1-ol a, Racemic standard. b, After reaction. c, The detail of integration.**

**(S)-1-(*o*-methyl-phenyl)-but-3-en-1-ol:**

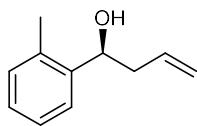

Following the general procedure for the allylation of aldehydes, the title compound was obtained in 97% yield with spectral properties reported in literature. Enantiomeric excess was determined by HPLC with a chiralcel AD-H column: hexane/*i*PrOH = 95/5; flow rate = 0.5 mL/min;  $t_{\text{minor}} = 13.98$  min,  $t_{\text{major}} = 16.37$  min; ee = 86%.  $^1\text{H}$  NMR (400 MHz,  $\text{CDCl}_3$ )  $\delta$ : 2.00 (br s, 1H), 2.34 (s, 3H), 2.35-2.55 (m, 2H), 4.98 (dd, 1H), 5.15-5.21 (m, 2H), 5.81-5.92 (m, 1H), 7.13-7.50 (m, 4H).

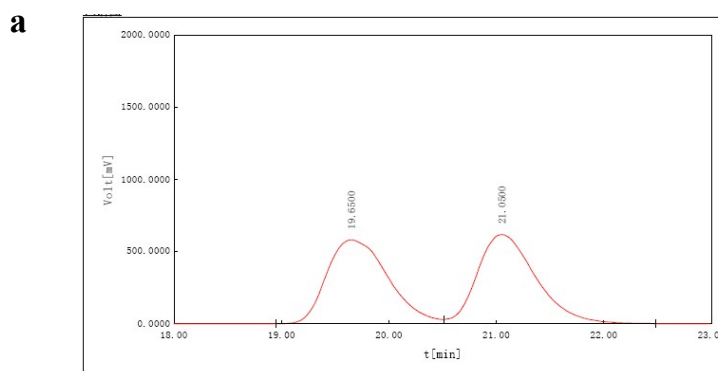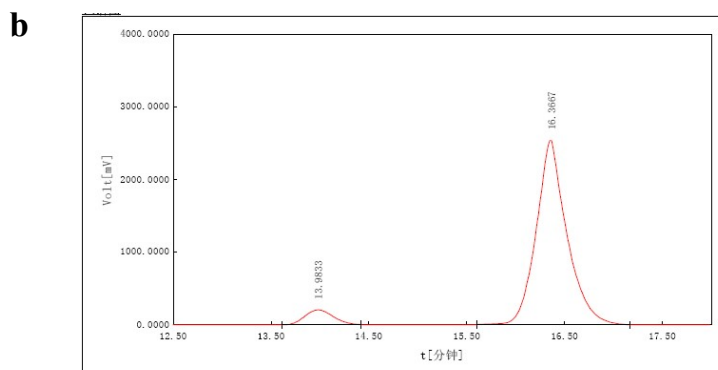

**c**

| Serial Number | Retention Time[min] | Area[mAbs*s] | Type | Area%   |
|---------------|---------------------|--------------|------|---------|
| 1             | 13.9833             | 4192.3245    | BB   | 7.0663  |
| 2             | 16.3667             | 55135.7892   | BB   | 92.9337 |
| The Total     |                     | 59328.1137   |      |         |

**Supplementary Figure 68. HPLC spectra for (S)-1-(*o*-methyl-phenyl)-but-3-en-1-ol. a, Racemic standard. b, After reaction. c, The detail of integration**

**(S)-1-(2-Nitro-phenyl)-but-3-en-1-ol:**

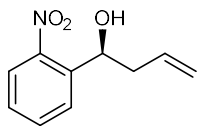

Following the general procedure for the allylation of aldehydes, the title compound was obtained in 97% yield with spectral properties reported in literature. Enantiomeric excess was determined by HPLC with a chiralcel OD-H column: hexane/*i*PrOH = 99/1; flow rate = 0.5 mL/min;  $t_{\text{minor}} = 57.53$  min,  $t_{\text{minor}} = 62.15$  min; ee = 98%.  $^1\text{H}$  NMR (400 MHz,  $\text{CDCl}_3$ )  $\delta$ : 7.95 (d, 2H), 7.85 (d, 2H), 7.65-7.69 (t, 1H), 7.43-7.47 (t, 1H), 5.87-5.97 (m, 1H), 5.33-5.36 (dd, 1H), 2.21-2.25 (m, 2H), 2.70-2.76 (m, 1H), 2.49-2.41 (m, 2H).

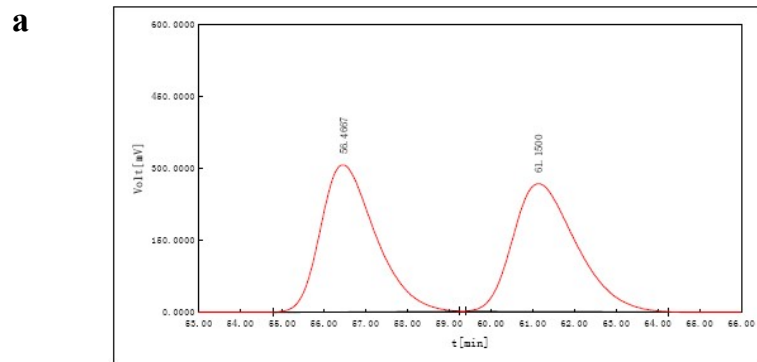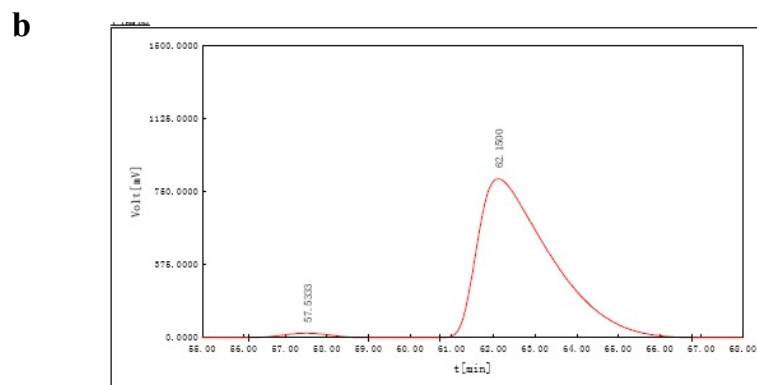

**c**

| Serial Number | Retention Time[min] | Area[mAbs*s] | Type | Area%   |
|---------------|---------------------|--------------|------|---------|
| 1             | 57.5333             | 1253.2147    | BB   | 1.2419  |
| 2             | 62.1500             | 99657.8631   | BB   | 98.7581 |
| The Total     |                     | 100911.0778  |      |         |

**Supplementary Figure 69. HPLC spectra for (S)-1-(2-Nitro-phenyl)-but-3-en-1-ol**  
**a**, Racemic standard. **b**, After reaction. **c**, The detail of integration

**(R)-1-Thiophen-2-yl-but-3-en-1-ol:**

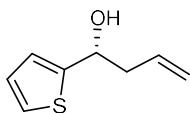

Following the general procedure for the allylation of aldehydes, the title compound was obtained in 93% yield with spectral properties reported in literature. Enantiomeric excess was determined by HPLC with a chiralcel OJ-H column: hexane/*i*PrOH = 93/7; flow rate = 0.5 mL/min;  $t_{\text{major}}$  = 16.30 min,  $t_{\text{minor}}$  = 18.57 min; ee = 88 %.  $^1\text{H NMR}$  (400 MHz,  $\text{CDCl}_3$ )  $\delta$ : 2.18-2.19 (m, 1H), 2.61-2.64 (m, 2H), 4.97-5.00 (m, 1H), 5.15-5.22 (m, 2H), 5.78-5.88 (m, 1H), 6.96-6.99 (m, 2H), 7.24-7.26 (m, 1H).

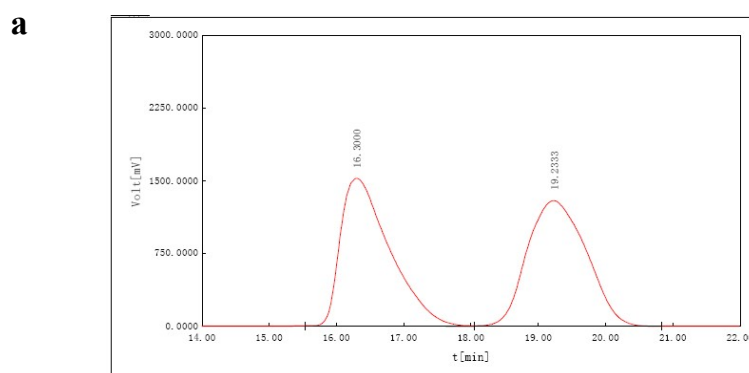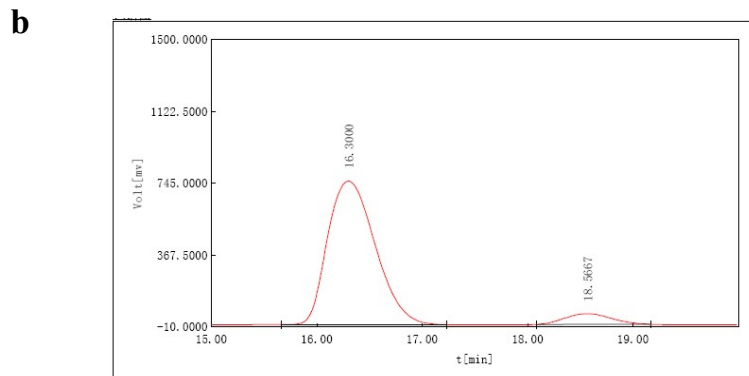

**c**

| Serial Number | Retention Time[min] | Area[mAbs*s] | Type | Area%   |
|---------------|---------------------|--------------|------|---------|
| 1             | 16.3000             | 23767.3160   | BB   | 93.7585 |
| 2             | 18.5667             | 1582.2297    | BB   | 6.2415  |
| The Total     |                     | 25350.1517   |      |         |

**Supplementary Figure 70. HPLC spectra for (R)-1-Thiophen-2-yl-but-3-en-1-ol.**  
**a**, Racemic standard. **b**, After reaction. **c**, The detail of integration.

**1-(3,5-bis(benzyloxy)phenyl)but-3-en-1-ol:**

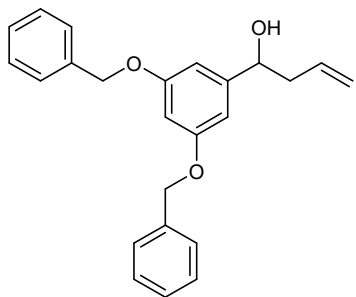

Following the general procedure for the allylation of aldehydes, the title compound was obtained in 93% yield with spectral properties reported in literature.  $^1\text{H}$  NMR (400 MHz,  $\text{CDCl}_3$ )  $\delta$ : 7.48-7.29 (m, 10H), 6.63 (d,  $J = 2.3$  Hz, 2H), 6.55 (t,  $J = 2.3$  Hz, 1H), 5.89-5.70 (m, 1H), 5.20-5.11 (m, 2H), 5.04 (s, 4H), 4.67 (dd,  $J = 7.6, 5.1$  Hz, 1H), 2.58-2.39 (m, 2H), 1.92 (br s, 1H).  $^{13}\text{C}$  NMR (400 MHz,  $\text{CDCl}_3$ )  $\delta$ : 160.04, 146.54, 136.87, 134.37, 128.61, 128.02, 127.59, 118.49, 104.97, 101.15, 73.29, 70.12, 43.71. HRMS-ESI ( $m/z$ ): Calculated for  $\text{C}_{24}\text{H}_{25}\text{O}_3$  ( $\text{M}+\text{H}$ ) $^+$ : 361.1804, Found: 361.1797.



**(R)-1-Phenyl-but-3-yn-1-ol:**

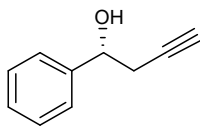

Following the general procedure for the propargylation of aldehydes, the title compound was obtained in 92% yield with spectral properties reported in literature. Enantiomeric excess was determined by HPLC with a chiralcel OD-H column: hexane/iPrOH = 95/5; flow rate = 1.0 mL/min;  $t_{\text{major}} = 12.07$  min,  $t_{\text{minor}} = 14.70$  min; ee = 92%.  $^1\text{H NMR}$  (400 MHz,  $\text{CDCl}_3$ )  $\delta$ : 7.41-7.29 (m, 5H), 4.88 (t,  $J = 6.8$  Hz, 1H), 2.66-2.63 (m, 2H), 2.37 (br.s., 1H), 2.08 (t,  $J = 2.4$  Hz, 1H).

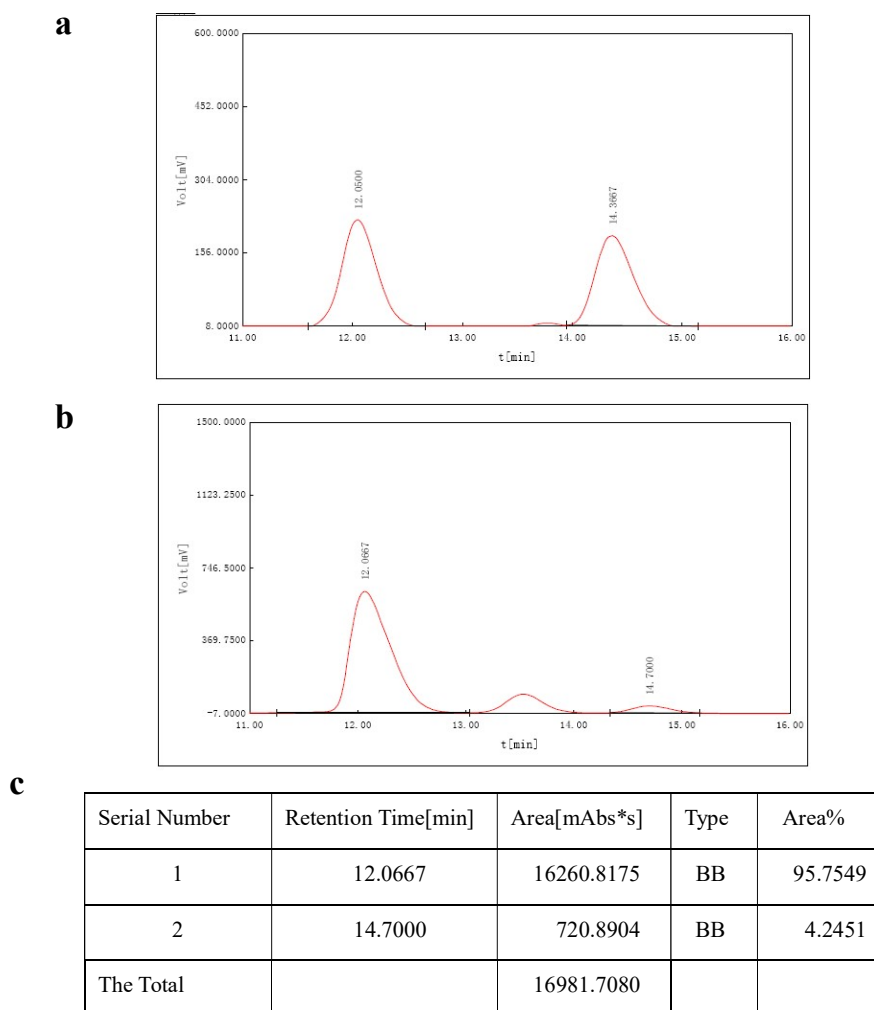

**Supplementary Figure 71. HPLC spectra for (R)-1-Phenyl-but-3-yn-1-ol. a,** Racemic standard. **b,** After reaction. **c,** The detail of integration.

**(R)-1-(4-Chloro-phenyl)-but-3-yn-1-ol:**

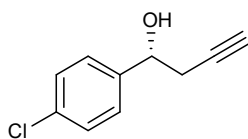

Following the general procedure for the propargylation of aldehydes, the title compound was obtained in 93% yield with spectral properties reported in literature. Enantiomeric excess was determined by HPLC with a chiralcel OD-H column: hexane/iPrOH = 98/2; flow rate = 1.0 mL/min;  $t_{\text{major}} = 20.38$  min,  $t_{\text{minor}} = 22.58$  min; ee = 92%.  $^1\text{H}$  NMR (400 MHz,  $\text{CDCl}_3$ )  $\delta$ : 7.33 (s, 4H), 4.85 (t,  $J = 6.4$  Hz 1H), 2.62-2.60 (m, 2H), 2.46 (br.s., 1H), 2.08 (t,  $J = 2.8$  Hz, 1H).

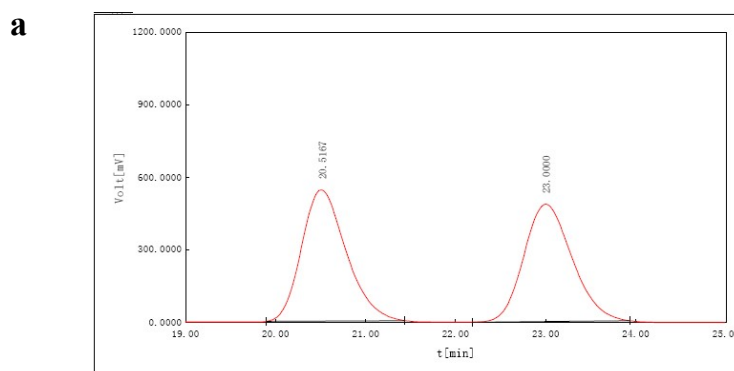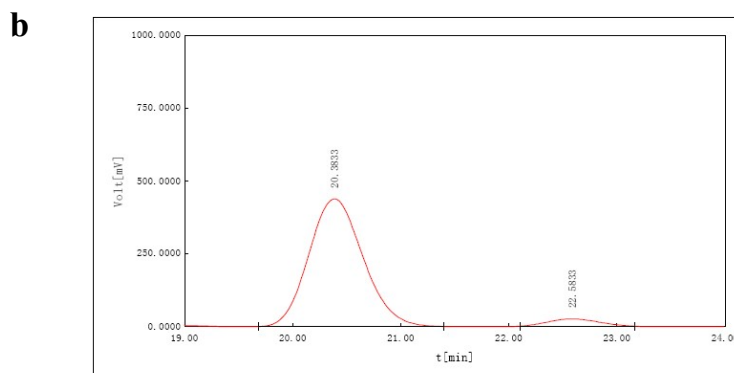

**c**

| Serial Number | Retention Time[min] | Area[mAbs*s] | Type | Area%   |
|---------------|---------------------|--------------|------|---------|
| 1             | 20.3833             | 15428.8393   | BB   | 95.7556 |
| 2             | 22.5833             | 683.8899     | BB   | 4.2544  |
| The Total     |                     | 16112.7279   |      |         |

**Supplementary Figure 72. HPLC spectra for (R)-1-(4-Chloro-phenyl)-but-3-yn-1-ol. a, Racemic standard. b, After reaction. c, The detail of integration.**

**(R)-1-(4-Bromo-phenyl)-but-3-yn-1-ol:**

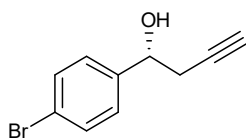

Following the general procedure for the propargylation of aldehydes, the title compound was obtained in 91% yield with spectral properties reported in literature. Enantiomeric excess was determined by HPLC with a chiralcel OD-H column: hexane/iPrOH = 98/2; flow rate = 1.0 mL/min;  $t_{\text{major}} = 23.67$  min,  $t_{\text{minor}} = 26.28$  min; ee = 92%.  $^1\text{H}$  NMR (400 MHz,  $\text{CDCl}_3$ )  $\delta$ : 7.49-7.47 (m, 2H), 7.28-7.26 (m, 2H), 4.85-4.82 (m, 1H), 2.62-2.59 (m, 2H), 2.46 (br.s., 1H), 2.09-2.07 (m, 1H).

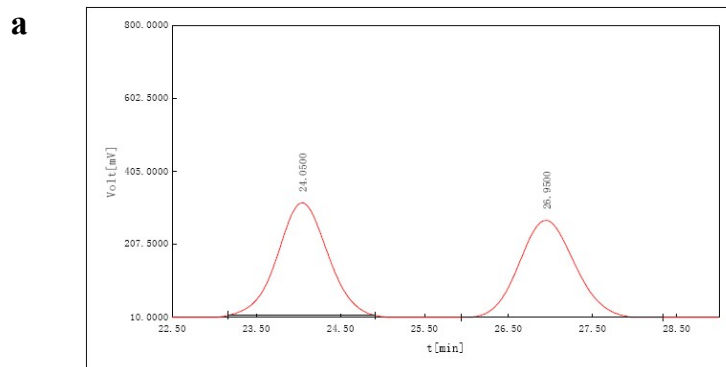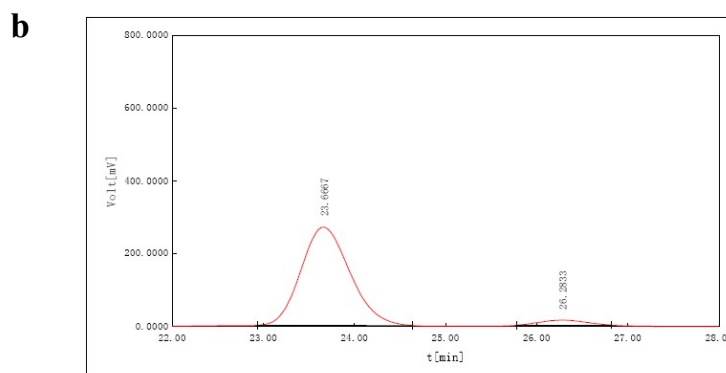

**c**

| Serial Number | Retention Time[min] | Area[mAbs*s] | Type | Area%   |
|---------------|---------------------|--------------|------|---------|
| 1             | 23.6667             | 10113.1791   | BB   | 95.9430 |
| 2             | 26.2833             | 427.6411     | BB   | 4.0570  |
| The Total     |                     | 10540.8202   |      |         |

**Supplementary Figure 73. HPLC spectra for (R)-1-(4-Bromo-phenyl)-but-3-yn-1-ol. a, Racemic standard. b, After reaction. c, The detail of integration.**

**(R)-1-(4-Nitro-phenyl)-but-3-yn-1-ol:**

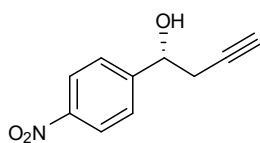

Following the general procedure for the propargylation of aldehydes, the title compound was obtained in 94% yield with spectral properties reported in literature. Enantiomeric excess was determined by HPLC with a chiralcel OJ-H column: hexane/iPrOH = 90/10; flow rate = 1.0 mL/min;  $t_{\text{minor}} = 41.08$  min,  $t_{\text{major}} = 47.18$  min; ee = 91%.  $^1\text{H}$  NMR (400 MHz,  $\text{CDCl}_3$ )  $\delta$ : 8.24-8.21 (m, 2H), 7.59-7.57 (m, 2H), 5.02-4.98 (m, 1H), 2.73-2.56 (m, 3H), 2.11 (d,  $J = 2.8$  Hz, 1H).

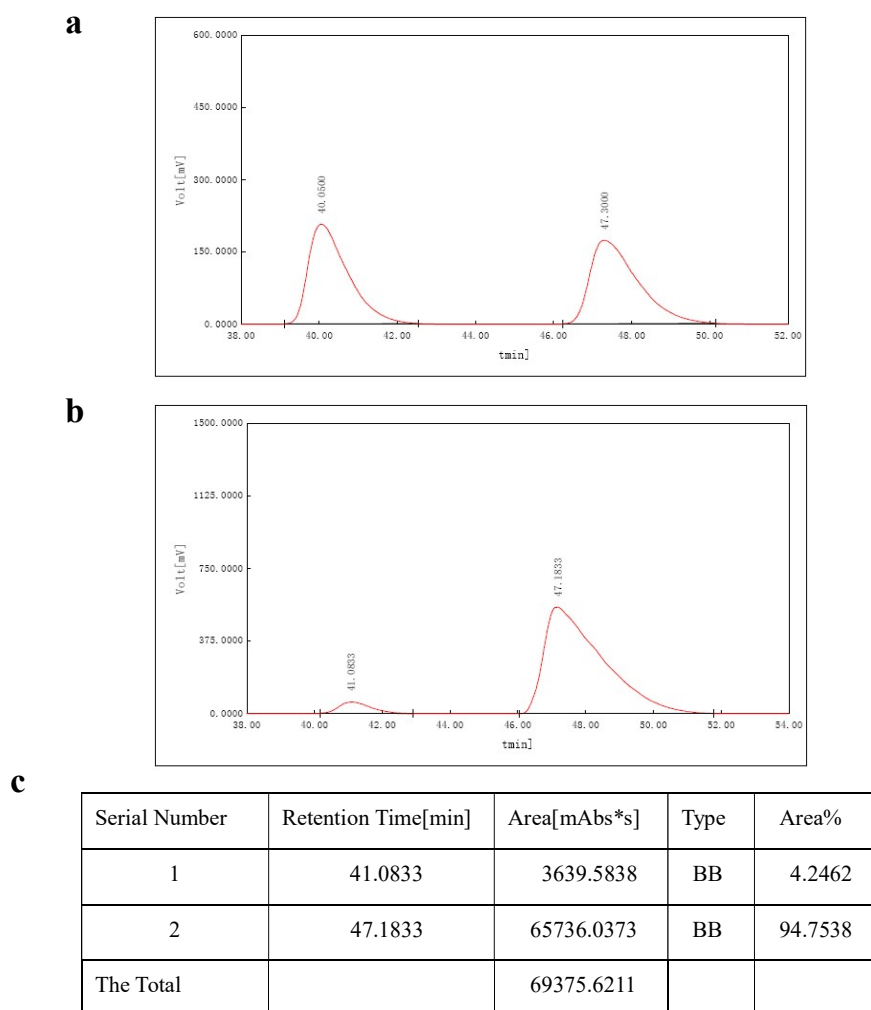

**Supplementary Figure 74. HPLC spectra for (R)-1-(4-Nitro-phenyl)-but-3-yn-1-ol. a, Racemic standard. b, After reaction. c, The detail of integration.**

**(R)-Methyl 4-(1-hydroxybut-3-yn-1-yl)benzoate:**

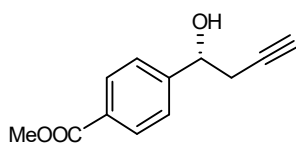

Following the general procedure for the propargylation of aldehydes, the title compound was obtained in 92% yield with spectral properties reported in literature. Enantiomeric excess was determined by HPLC with a chiralcel OD-H column: hexane/iPrOH = 90/10; flow rate = 1.0 mL/min;  $t_{\text{major}} = 12.83$  min,  $t_{\text{minor}} = 17.47$  min; ee = 94%.  $^1\text{H NMR}$  (400 MHz,  $\text{CDCl}_3$ )  $\delta$ : 8.01 (d,  $J = 8.8$  Hz, 2H), 7.46 (d,  $J = 8.4$  Hz, 2H), 4.95-4.91 (m, 1H), 3.90 (s, 3H), 2.66-2.59 (m, 3H), 2.08 (d,  $J = 2.8$  Hz, 1H).

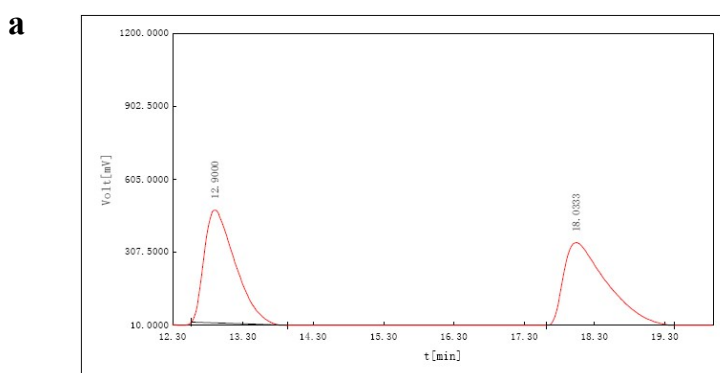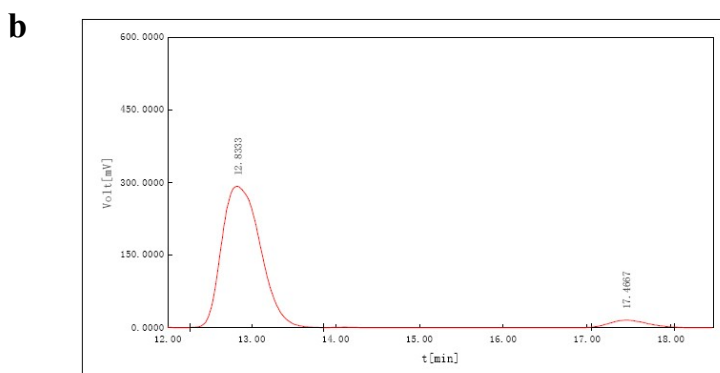

**c**

| Serial Number | Retention Time[min] | Area[mAbs*s] | Type | Area%   |
|---------------|---------------------|--------------|------|---------|
| 1             | 12.8333             | 9462.9816    | BB   | 96.7058 |
| 2             | 17.4667             | 322.3483     | BB   | 3.2942  |
| The Total     |                     | 9785.3299    |      |         |

**Supplementary Figure 75. HPLC spectra for (R)-Methyl 4-(1-hydroxybut-3-yn-1-yl)benzoate. a, Racemic standard. b, After reaction. c, The detail of integration.**

**(R)-1-(4-Methoxy-phenyl)-but-3-yn-1-ol:**

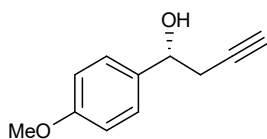

Following the general procedure for the propargylation of aldehydes, the title compound was obtained in 85% yield with spectral properties reported in literature. Enantiomeric excess was determined by HPLC with a chiralcel OD-H column: hexane/iPrOH = 95/5; flow rate = 1.0 mL/min;  $t_{\text{major}} = 12.7$  min,  $t_{\text{minor}} = 23.1$  min; ee = 96%.  $^1\text{H}$  NMR (400 MHz,  $\text{CDCl}_3$ )  $\delta$ : 7.33-7.31 (m, 2H), 6.90-6.88 (m, 2H), 4.84 (t,  $J = 6.4$  Hz, 1H), 3.80 (s, 3H), 2.64-2.61 (m, 2H), 2.30 (br.s., 1H), 2.07 (t,  $J = 2.8$  Hz, 1H).

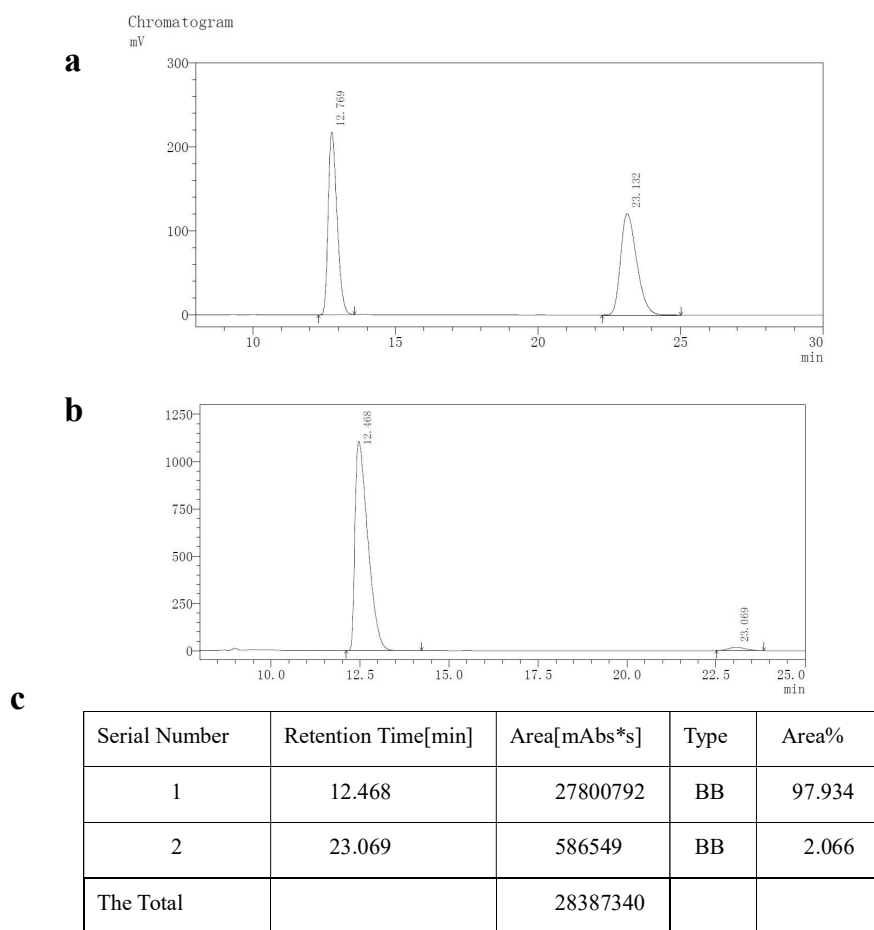

**Supplementary Figure 76. HPLC spectra for (R)-1-(4-Methoxy-phenyl)-but-3-yn-1-ol. a, Racemic standard. b, After reaction. c, The detail of integration.**

**(R)-1-(3-Methoxy-phenyl)-but-3-yn-1-ol:**

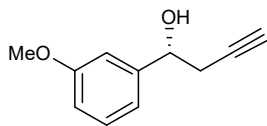

The product was obtained in 90% yield with spectral properties reported in literature. Enantiomeric excess was determined by HPLC with a chiralcel AD-H column: hexane/iPrOH = 98/2; flow rate = 1.0 mL/min;  $t_{\text{major}} = 27.60$  min,  $t_{\text{minor}} = 30.48$  min; ee = 99%.  $^1\text{H NMR}$  (400 MHz,  $\text{CDCl}_3$ )  $\delta$ : 7.30-7.26 (m, 1H), 6.97-6.95 (m, 2H), 6.83 (ddd,  $J = 7.6, 2.8, 1.2$  Hz, 1H), 4.86 (d,  $J = 6.4$  Hz, 1H), 3.81 (s, 3H), 2.65-2.62 (m, 2H), 2.42 (br.s., 1H), 2.09 (t,  $J = 2.8$  Hz, 1H).

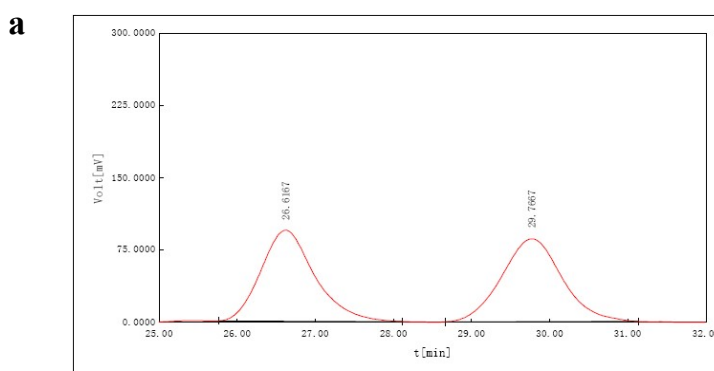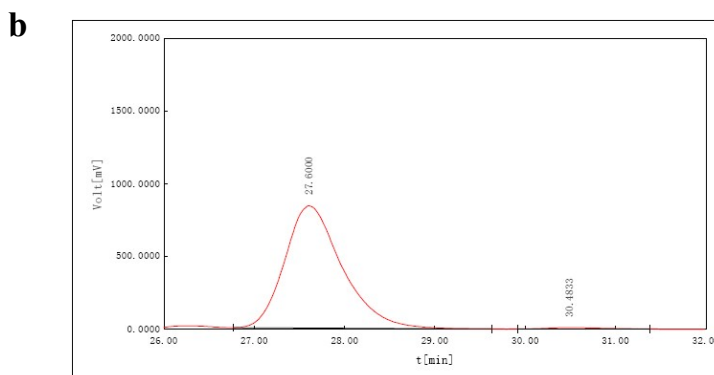

**c**

| Serial Number | Retention Time[min] | Area[mAbs*s] | Type | Area%   |
|---------------|---------------------|--------------|------|---------|
| 1             | 27.6000             | 37073.3921   | BB   | 99.5194 |
| 2             | 30.4833             | 405.0096     | BB   | 0.4806  |
| The Total     |                     | 37478.4016   |      |         |

**Supplementary Figure 77. HPLC spectra for (R)-1-(3-Methoxy-phenyl)-but-3-yn-1-ol. a, Racemic standard. b, After reaction. c, The detail of integration.**



**(R)-1-(Naphthalen-1-yl)but-3-yn-1-ol:**

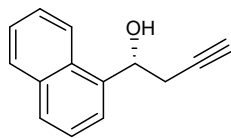

Following the general procedure for the propargylation of aldehydes, the title compound was obtained in 92% yield with spectral properties reported in literature. Enantiomeric excess was determined by HPLC with a chiralcel OJ-H column: hexane/iPrOH = 90/10; flow rate = 1.0 mL/min;  $t_{\text{minor}} = 24.50$  min,  $t_{\text{major}} = 31.85$  min; ee = 93%.  $^1\text{H NMR}$  (400 MHz,  $\text{CDCl}_3$ )  $\delta$ : 8.07 (d,  $J = 8.4$  Hz, 1H), 7.90-7.80 (m, 2H), 7.72 (d,  $J = 7.2$  Hz, 1H), 7.56-7.48 (m, 3H), 5.66 (dd,  $J = 4.4$  Hz, 1H), 2.93-2.87 (m, 1H), 2.79-2.72 (m, 1H), 2.14 (t,  $J = 3.2$  Hz, 1H).

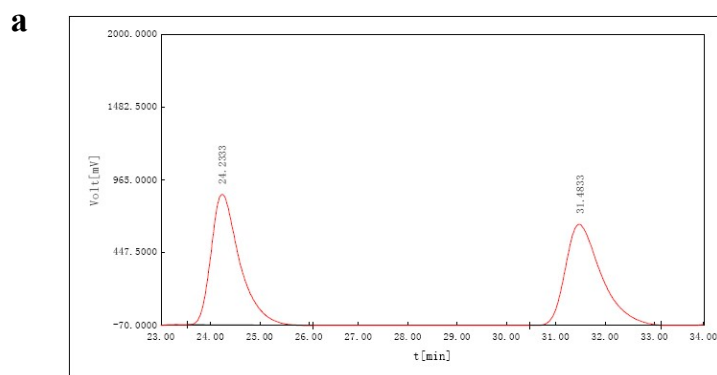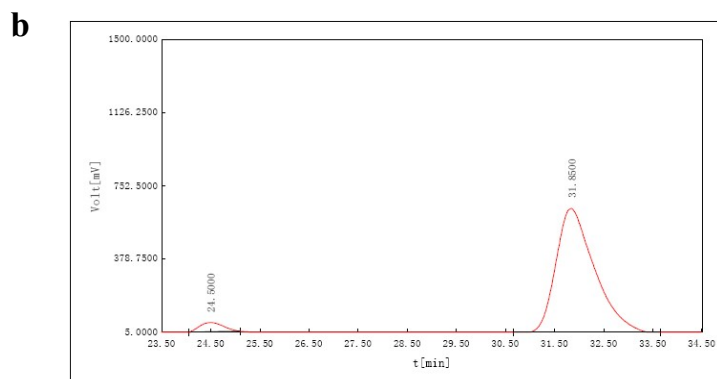

**c**

| Serial Number | Retention Time[min] | Area[mAbs*s] | Type | Area%   |
|---------------|---------------------|--------------|------|---------|
| 1             | 24.5000             | 1260.2184    | BB   | 3.3727  |
| 2             | 31.8500             | 36105.0486   | BB   | 96.6273 |
| The Total     |                     | 37365.2670   |      |         |
|               |                     |              |      |         |

**Supplementary Figure 78. HPLC spectra for (*R*)-1-(Naphthalen-1-yl)but-3-yn-1-ol. a, Racemic standard. b, After reaction. c, The detail of integration.**

**(*R, E*)-1-phenylhex-1-en-5-yn-3-ol:**

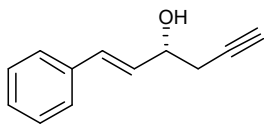

Following the general procedure for the propargylation of aldehydes, the title compound was obtained in 90% yield with spectral properties reported in literature. Enantiomeric excess was determined by HPLC with a chiralcel OD-H column: hexane/iPrOH = 95/5; flow rate = 0.8 mL/min;  $t_{\text{major}} = 25.07$  min,  $t_{\text{minor}} = 34.83$  min; ee = 97%.  $^1\text{H NMR}$  (400 MHz,  $\text{CDCl}_3$ )  $\delta$ : 7.41-7.24 (m, 5 H), 6.66 (d,  $J = 16.4$  Hz, 1 H), 6.28(dd,  $J = 16.00$  Hz, 6.4 Hz, 1 H), 4.48 (d,  $J = 6.4$  Hz, 1 H), 2.63-2.50 (m, 2 H), 2.17 (br.s., 1 H), 2.10 (t,  $J = 2.4$  Hz, 1 H).

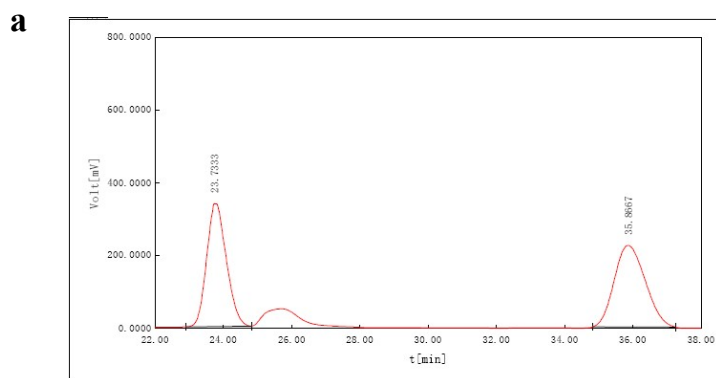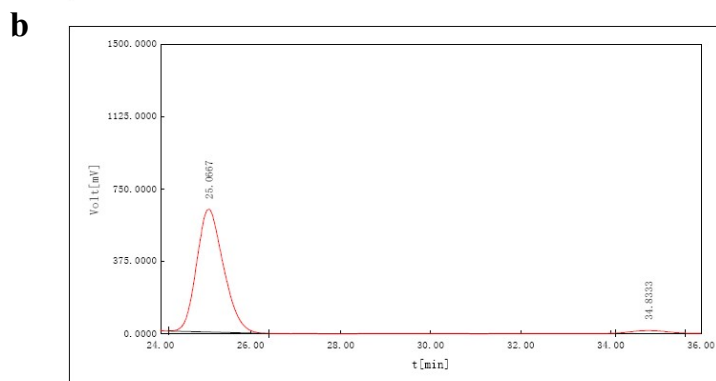

**c**

| Serial Number | Retention Time[min] | Area[mAbs*s] | Type | Area%   |
|---------------|---------------------|--------------|------|---------|
| 1             | 25.0667             | 26637.5978   | BB   | 98.5565 |
| 2             | 34.8333             | 384.1455     | BB   | 1.4445  |
| The Total     |                     | 27021.7433   |      |         |

**Supplementary Figure 79. HPLC spectra for (R, E)-1-phenylhex-1-en-5-yn-3-ol.**  
**a**, Racemic standard. **b**, After reaction. **c**, The detail of integration.

**1-(3, 5-bis(benzyloxy)phenyl)but-3-yn-1-ol:**

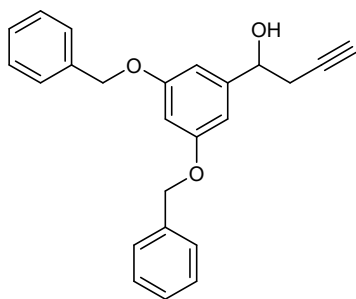

Following the general procedure for the allylation of aldehydes, the title compound was obtained in 93% yield with spectral properties reported in literature.  $^1\text{H}$  NMR (400 MHz,  $\text{CDCl}_3$ )  $\delta$ : 7.45-7.30 (m, 10H), 6.66 (d,  $J = 2.3$  Hz, 2H), 6.56 (t,  $J = 2.2$  Hz, 1H), 5.04 (s, 4H), 4.83-4.78 (m, 1H), 2.66-2.59 (m, 2H), 2.07-2.05 (m, 1H).  $^{13}\text{C}$  NMR (400 MHz,  $\text{CDCl}_3$ )  $\delta$ : 160.04, 145.03, 136.78, 128.61, 128.03, 127.56, 104.89, 101.55, 80.61, 72.31, 71.09, 70.12, 29.40. HRMS-ESI ( $m/z$ ): Calculated for  $\text{C}_{24}\text{H}_{23}\text{O}_3$  ( $\text{M} + \text{H}$ ) $^+$ : 359.1647, Found: 359.1632.

### Recycling 1-Cr in propargylation of 3-methoxybenzaldehyde:

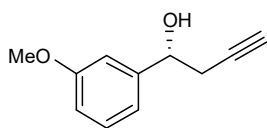

Following the general procedure for the propargylation of aldehydes, enantiomeric excess was determined by HPLC with a chiralcel AD-H column: hexane/iPrOH = 98/2; flow rate = 1.0 mL/min.

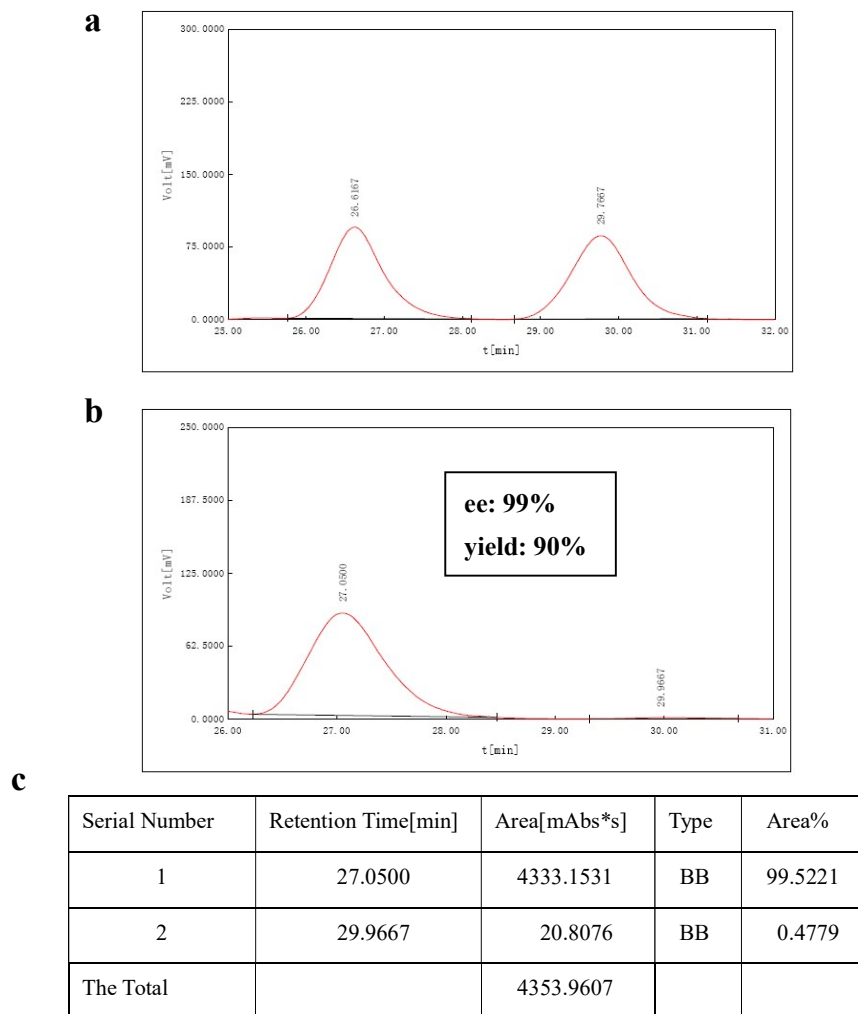

**Supplementary Figure 80. HPLC spectra for the second run. a**, Racemic standard. **b**, After reaction. **c**, The detail of integration.

**a**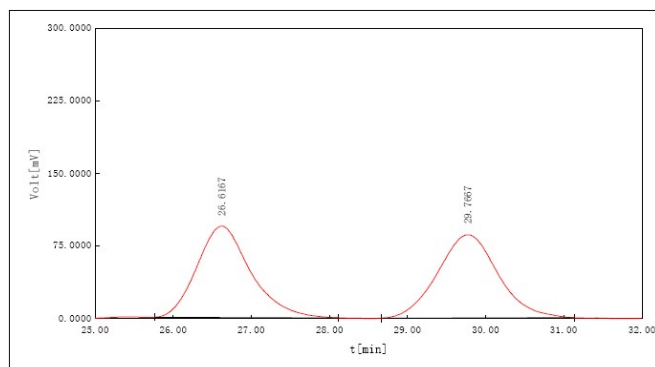**b**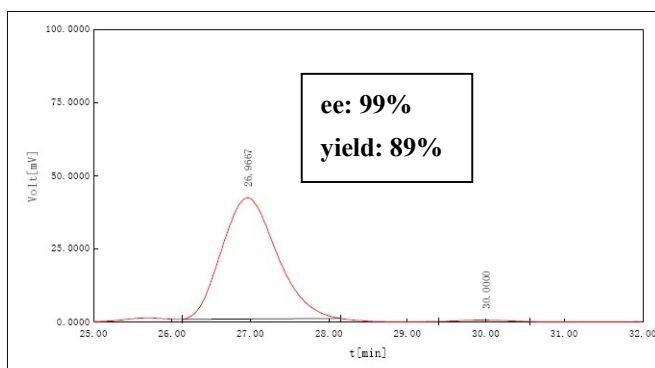**c**

| Serial Number | Retention Time[min] | Area[mAbs*s] | Type | Area%   |
|---------------|---------------------|--------------|------|---------|
| 1             | 26.9667             | 2027.1225    | BB   | 99.5094 |
| 2             | 30.0000             | 9.9941       | BB   | 0.4906  |
| The Total     |                     | 2037.1166    |      |         |

**Supplementary Figure 81. HPLC spectra for the third run. a, Racemic standard. b, After reaction. c, The detail of integration.**

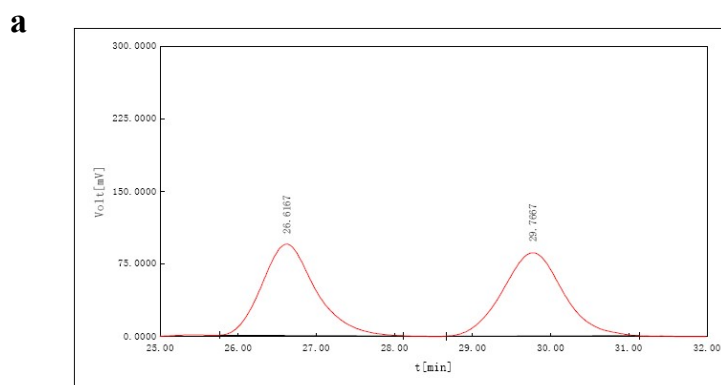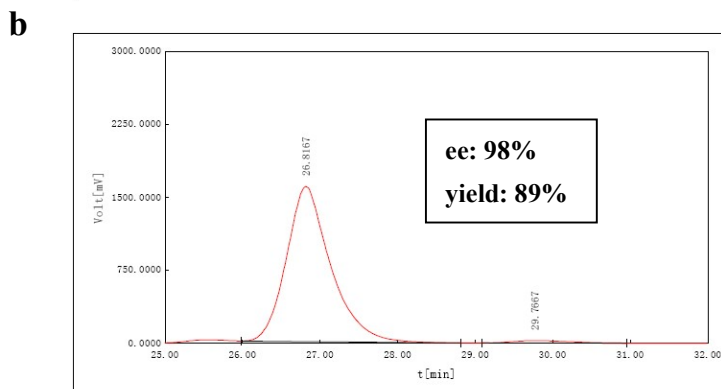

**c**

| Serial Number | Retention Time[min] | Area[mAbs*s] | Type | Area%   |
|---------------|---------------------|--------------|------|---------|
| 1             | 26.8167             | 63778.0600   | BB   | 98.8226 |
| 2             | 29.7667             | 759.8696     | BB   | 1.1774  |
| The Total     |                     | 64537.9296   |      |         |

**Supplementary Figure 82. HPLC spectra for the fourth run. a, Racemic standard. b, After reaction. c, The detail of integration.**



### Recycling 1-Cr in propargylation of 4-methoxybenzaldehyde:

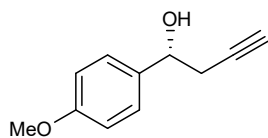

Following the general procedure for the propargylation of aldehydes, enantiomeric excess was determined by HPLC with a chiralcel OD-H column: hexane/iPrOH = 95/5; flow rate = 1.0 mL/min.

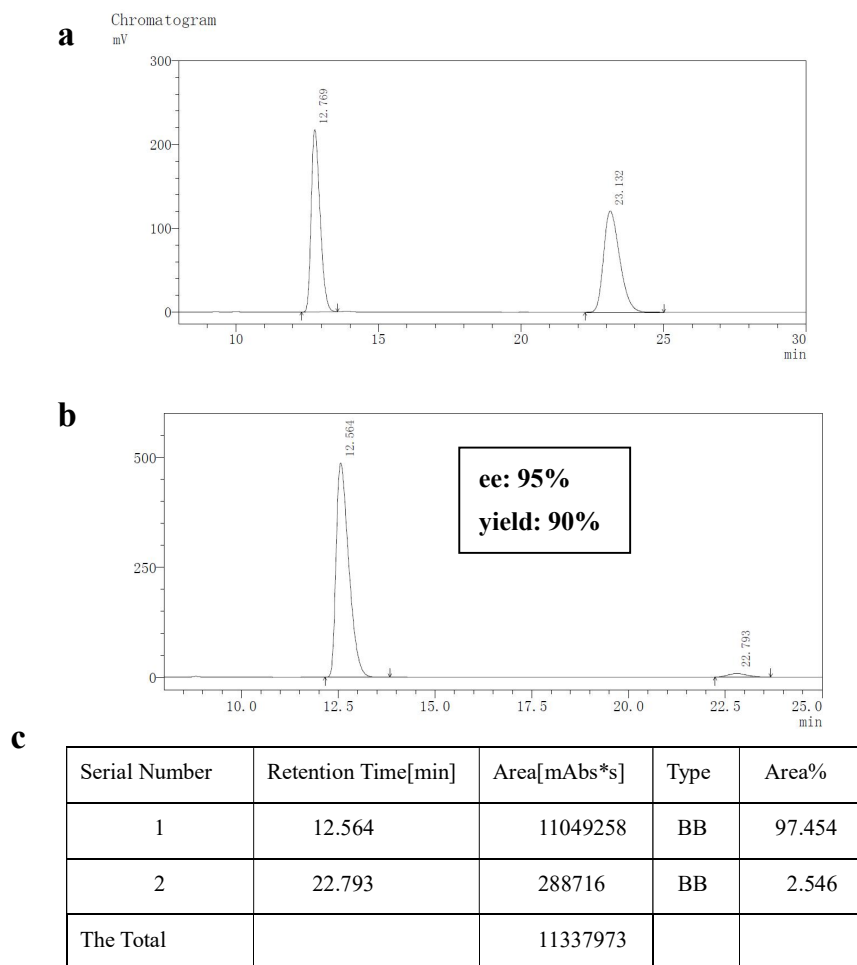

**Supplementary Figure 83. HPLC spectra for the second run. a, Racemic standard. b, After reaction. c, The detail of integration.**

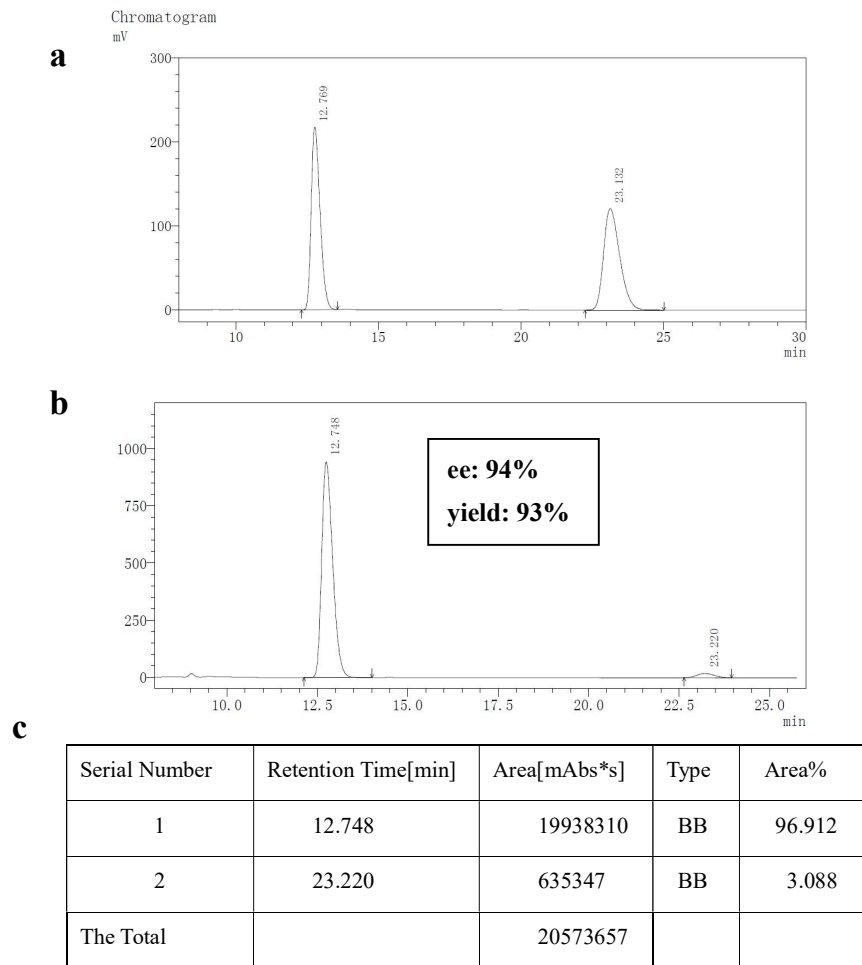

**Supplementary Figure 84. HPLC spectra for the third run. a, Racemic standard. b, After reaction. c, The detail of integration.**

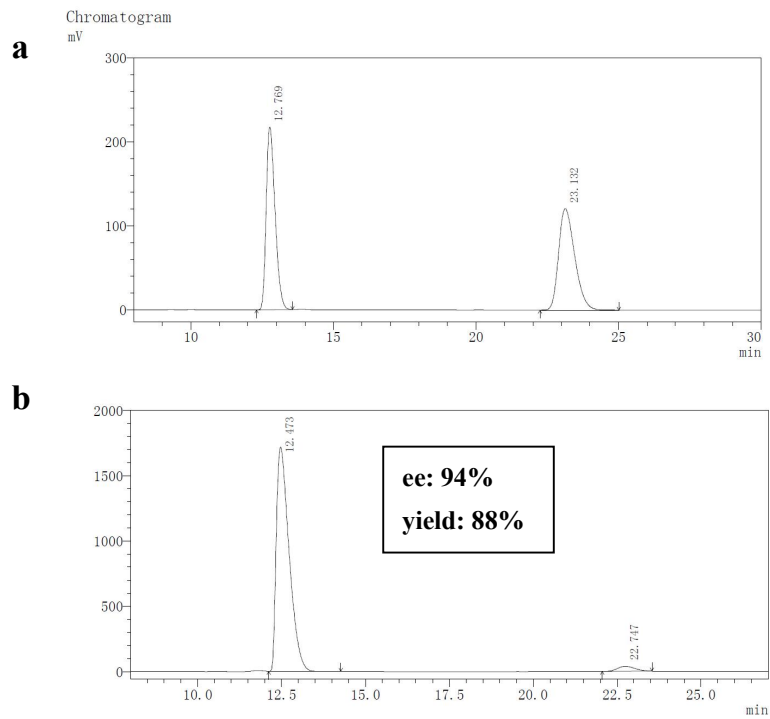

**c**

| Serial Number | Retention Time[min] | Area[mAbs*s] | Type | Area%  |
|---------------|---------------------|--------------|------|--------|
| 1             | 12.473              | 45527542     | BB   | 96.995 |
| 2             | 22.747              | 1410253      | BB   | 3.005  |
| The Total     |                     | 46937795     |      |        |

**Supplementary Figure 85. HPLC spectra for the fourth run. a**, Racemic standard. **b**, After reaction. **c**, The detail of integration.

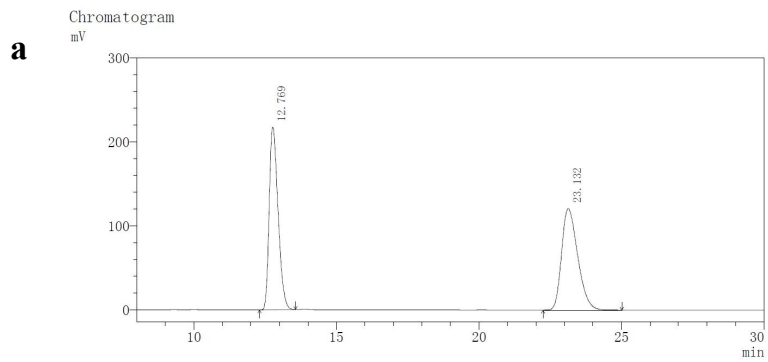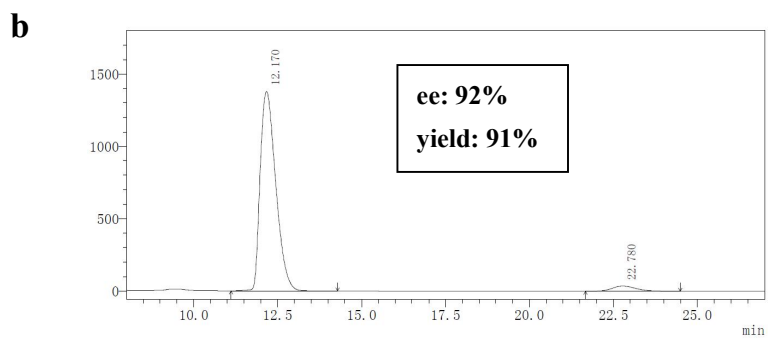

**c**

| Serial Number | Retention Time[min] | Area[mAbs*s] | Type | Area%  |
|---------------|---------------------|--------------|------|--------|
| 1             | 12.170              | 44458733     | BB   | 96.170 |
| 2             | 22.780              | 1770357      | BB   | 3.830  |
| The Total     |                     | 46229090     |      |        |

**Supplementary Figure 86. HPLC spectra for the fifth run. a, Racemic standard. b, After reaction. c, The detail of integration.**

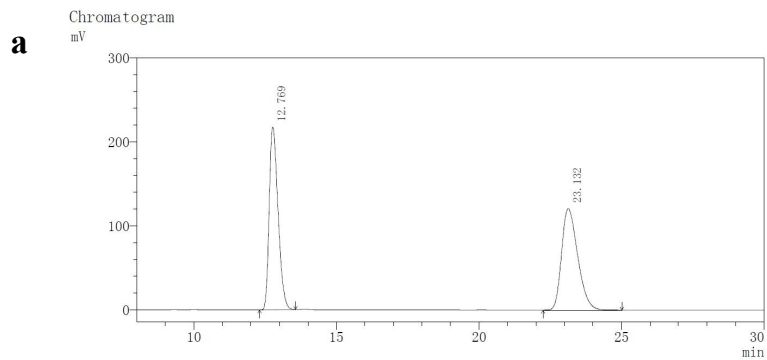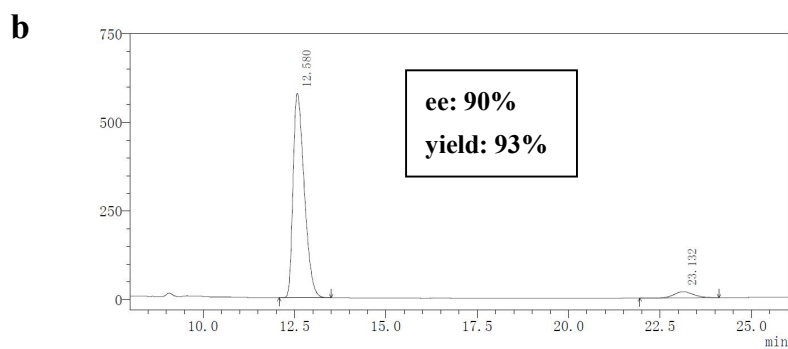

**c**

| Serial Number | Retention Time[min] | Area[mAbs*s] | Type | Area%  |
|---------------|---------------------|--------------|------|--------|
| 1             | 12.580              | 12261499     | BB   | 95.040 |
| 2             | 23.132              | 639883       | BB   | 4.960  |
| The Total     |                     | 12901382     |      |        |

**Supplementary Figure 87. HPLC spectra for the sixth run. a, Racemic standard. b, After reaction. c, The detail of integration.**

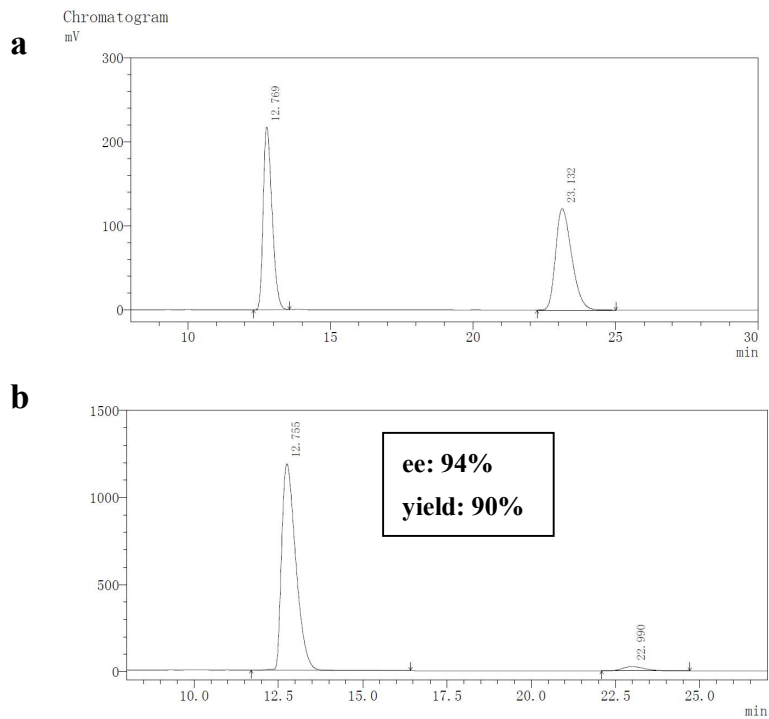

**c**

| Serial Number | Retention Time[min] | Area[mAbs*s] | Type | Area%  |
|---------------|---------------------|--------------|------|--------|
| 1             | 12.755              | 34533252     | BB   | 96.747 |
| 2             | 22.990              | 1161004      | BB   | 3.253  |
| The Total     |                     | 35694257     |      |        |

**Supplementary Figure 88. HPLC spectra for the seventh run. a, Racemic standard. b, After reaction. c, The detail of integration.**

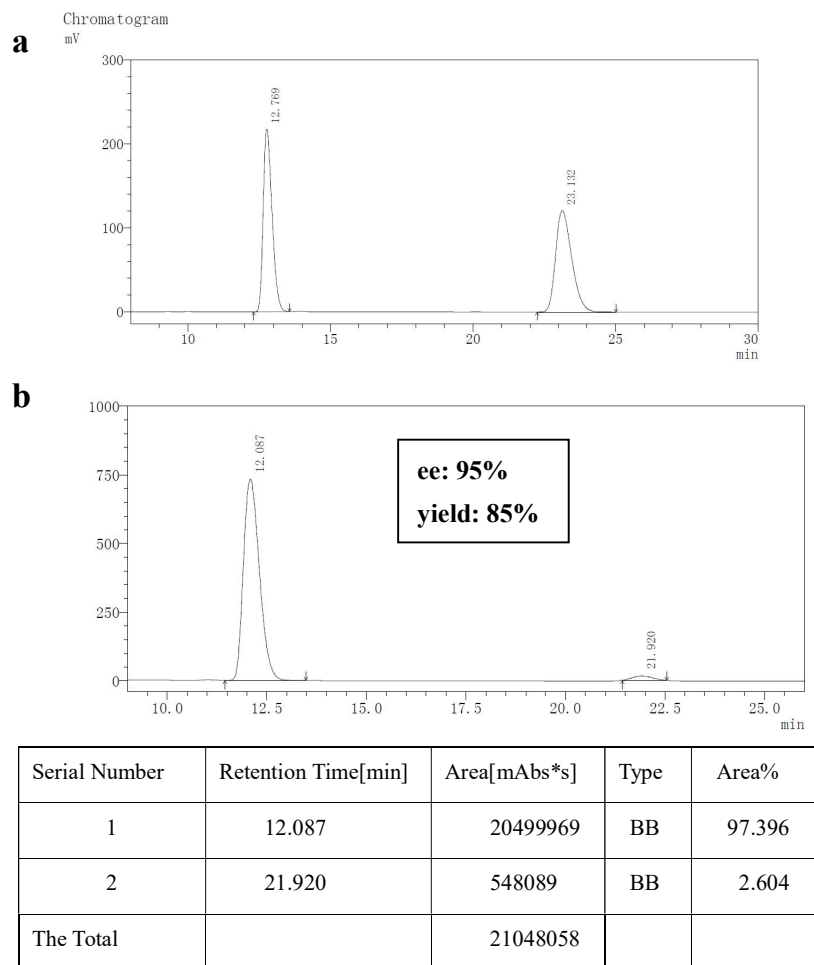

**Supplementary Figure 89. HPLC spectra for the eighth run. a, Racemic standard. b, After reaction. c, The detail of integration.**

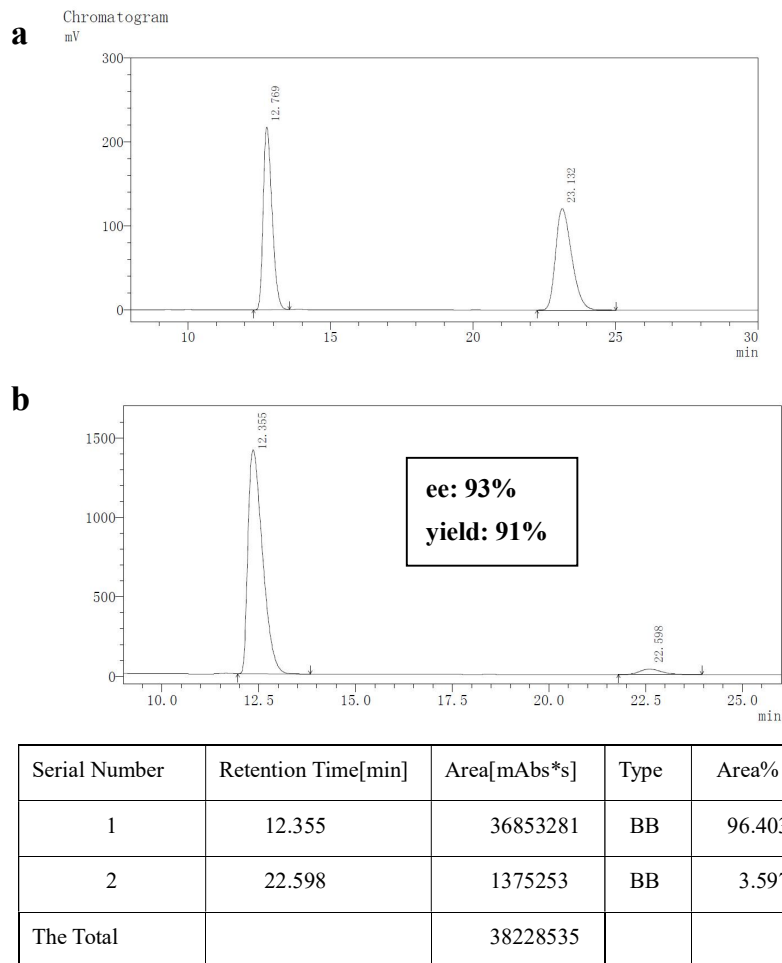

**Supplementary Figure 90. HPLC spectra for the ninth run. a, Racemic standard. b, After reaction. c, The detail of integration.**



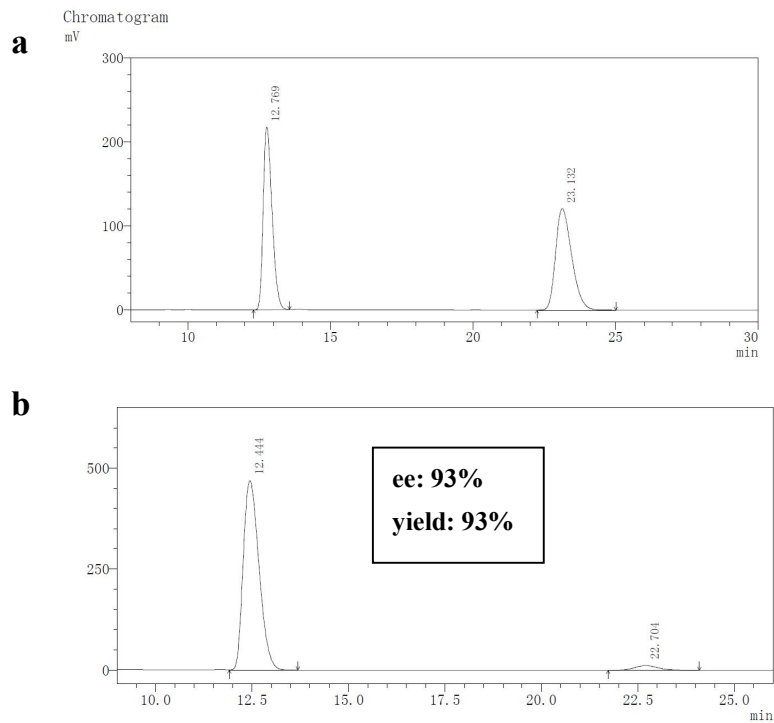

**Supplementary Figure 91. HPLC spectra for the tenth run. a, Racemic standard. b, After reaction. c, The detail of integration.**

**A bioactive compound obtained from propargylation of aldehydes with 1-Cr**

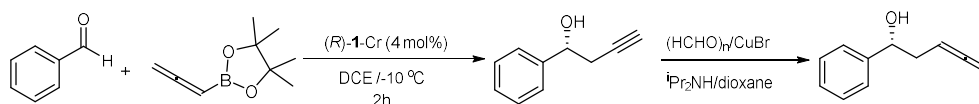

(*R*)-1-phenylpenta-3,4-dien-1-ol: Following the reported procedure (Shumaila, A. M et al. *Tetrahedron*, **2011**, 67, 936), the title compound was obtained in 83 % two-step yield with spectral properties reported in literature. Enantiomeric excess was determined by HPLC with a chiralcel OD-H column: hexane/iPrOH = 90/10; flow rate = 1.0 mL/min; *t*<sub>major</sub> = 9.00 min, *t*<sub>minor</sub> = 11.87 min; ee = 92%. <sup>1</sup>H NMR (400 MHz, CDCl<sub>3</sub>) δ: 7.37-7.35 (m, 4H), 7.30-7.26 (m, 1H), 5.12 (p, 1H), 4.77 (t, *J* = 6.2 Hz, 1H), 4.72 (dt, *J* = 6.4, 2.4 Hz, 2H), 2.49-2.44 (m, 2H), 2.22 (br s, 1H).

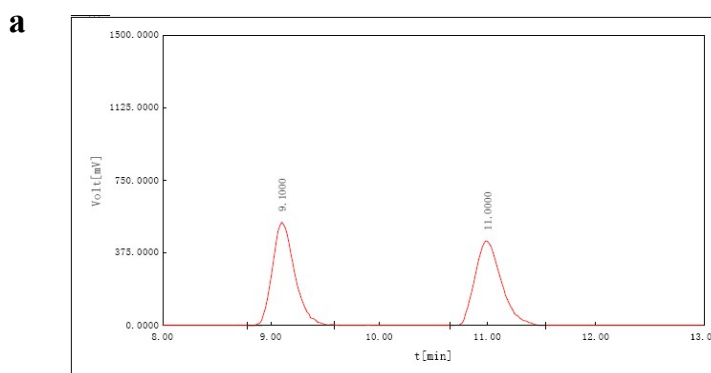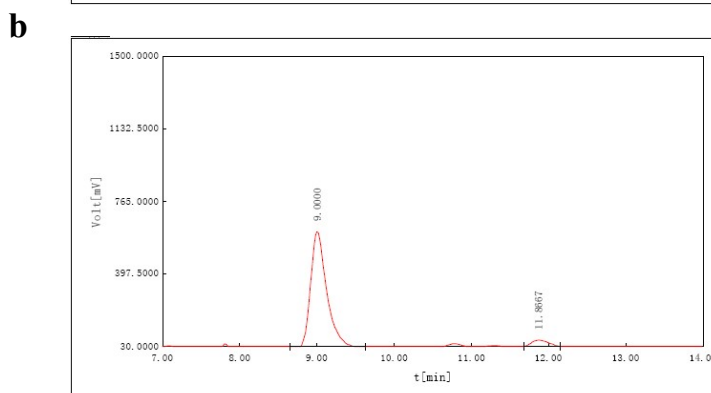

**c**

| Serial Number | Retention Time[min] | Area[mAbs*s] | Type | Area%   |
|---------------|---------------------|--------------|------|---------|
| 1             | 9.0000              | 8720.2894    | BB   | 95.8355 |
| 2             | 11.8667             | 378.9373     | BB   | 4.1645  |
| The Total     |                     | 9099.2267    |      |         |

**Supplementary Figure 92. HPLC spectra for (*R*)-1-phenylpenta-3,4-dien-1-ol. a, Racemic standard. b, After reaction. c, The detail of integration.**

**(R)-2-(2-nitro-1-phenylethyl)-1H-pyrrole:**

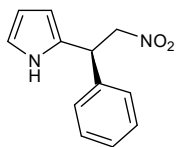

The product was prepared in 89% yield with spectral properties reported in literature. Enantiomeric excess was determined by HPLC with a chiralcel AD-H column: hexane/iPrOH = 90/10; flow rate = 1.0 mL/min;  $t_{\text{major}} = 9.85$  min,  $t_{\text{minor}} = 10.83$  min; ee = 90%.  $^1\text{H}$  NMR (400 MHz,  $\text{CDCl}_3$ )  $\delta$ : 7.84 (br, 1 H), 7.29-7.38 (m, 3 H), 7.22-7.25 (m, 2 H), 6.68-6.70 (m, 1 H), 6.17 (dd,  $J = 6.0$  Hz, 2.8 Hz, 1 H), 6.08-6.10 (m, 1 H), 4.99 (dd,  $J = 12.0$  Hz, 4.8 Hz, 1 H), 4.90 (t,  $J = 7.2$  Hz, 1 H), 4.81 (dd,  $J = 12.0$  Hz, 4.8 Hz, 1 H).

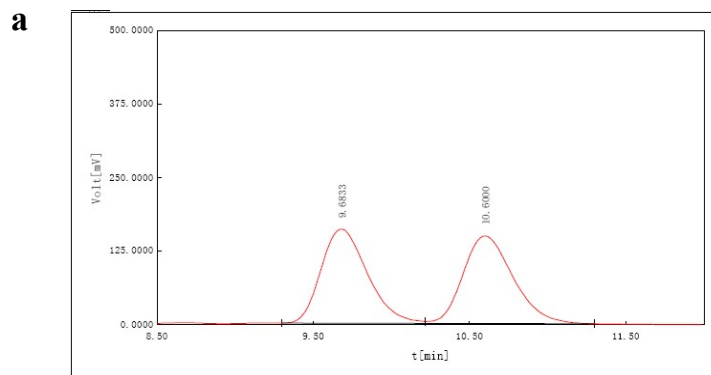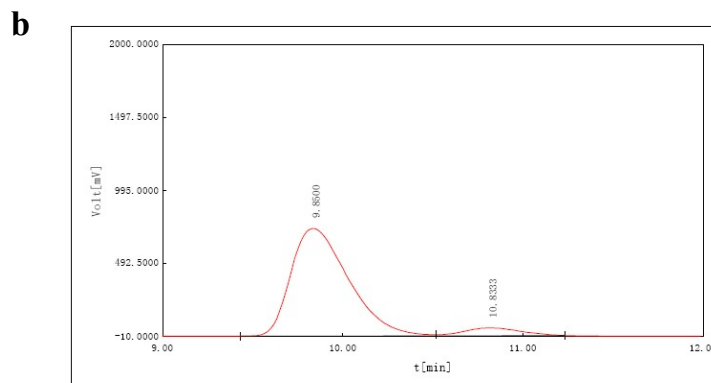

**c**

| Serial Number | Retention Time[min] | Area[mAbs*s] | Type | Area%   |
|---------------|---------------------|--------------|------|---------|
| 1             | 9.8500              | 16678.7536   | BB   | 94.8253 |
| 2             | 10.8333             | 910.1743     | BB   | 5.1747  |
| The Total     |                     | 17588.9279   |      |         |

**Supplementary Figure 93. HPLC spectra for (R)-2-(2-nitro-1-phenylethyl)-1H-pyrrole. a, Racemic standard. b, After reaction. c, The detail of integration.**

**(S)-2-(1-(4-methoxyphenyl)-2-nitroethyl)-1H-pyrrole:**

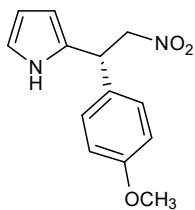

The product was prepared in 90% yield with spectral properties reported in literature. Ee was determined by HPLC with a chiralcel OD-H column: hexane/iPrOH = 80/20; flow rate = 1.0 mL/min;  $t_{\text{minor}}$  = 16.55 min,  $t_{\text{major}}$  = 20.95 min; ee = 96%.  $^1\text{H}$  NMR (400 MHz,  $\text{CDCl}_3$ )  $\delta$ : 7.86 (br, 1 H), 7.13-7.16 (m, 2 H), 6.85-6.89 (m, 2 H), 6.68 (m, 1 H), 6.16 (m, 1 H), 6.07 (m, 1 H), 4.96 (dd,  $J$  = 12 Hz, 6.8 Hz, 1 H), 4.84 (t,  $J$  = 8.0 Hz, 1 H), 4.76 (dd,  $J$  = 11.6 Hz, 8.0 Hz, 1 H), 3.79 (s, 3 H).

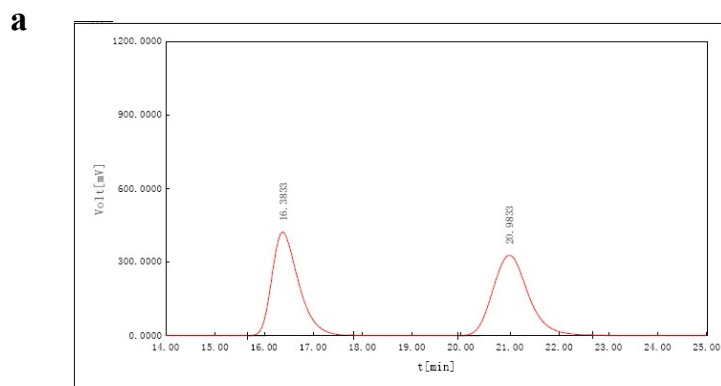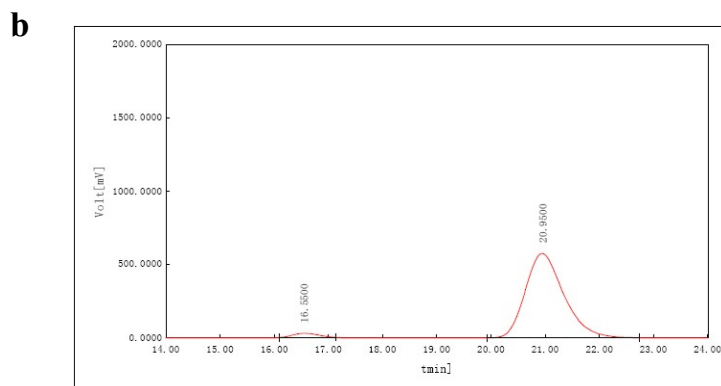

**c**

| Serial Number | Retention Time[min] | Area[mAbs*s] | Type | Area%   |
|---------------|---------------------|--------------|------|---------|
| 1             | 16.5500             | 640.7340     | BB   | 2.7834  |
| 2             | 20.9500             | 28704.9655   | BB   | 97.8166 |
| The Total     |                     | 29345.6995   |      |         |

**Supplementary Figure 94. HPLC spectra for (S)-2-(1-(4-methoxyphenyl)-2-nitroethyl)-1 H-pyrrole. a, Racemic standard. b, After reaction. c, The detail of integration.**

**(S)-2-(1-(4-ethoxyphenyl)-2-nitroethyl)-1H-pyrrole:**

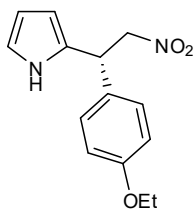

The product was prepared in 89% yield with spectral properties reported in literature. Ee was determined by HPLC with a chiralcel OD-H column: hexane/iPrOH = 80/20; flow rate = 1.0 mL/min;  $t_{\text{minor}} = 11.38$  min,  $t_{\text{major}} = 12.42$  min; ee = 94%.  $^1\text{H}$  NMR (400 MHz,  $\text{CDCl}_3$ )  $\delta$ : 7.85 (br, 1 H), 7.11-7.15 (m, 2 H), 6.84-6.88 (m, 2 H), 6.68 (m, 1 H), 6.16 (m, 1 H), 6.06 (m, 1 H), 4.96 (dd,  $J = 11.4$  Hz, 7.0 Hz, 1 H), 4.84 (t,  $J = 7.4$  Hz, 1 H), 4.76 (dd,  $J = 12.2$  Hz, 8.2 Hz, 1 H), 4.00 (q, 2 H), 1.40 (t, 3 H).

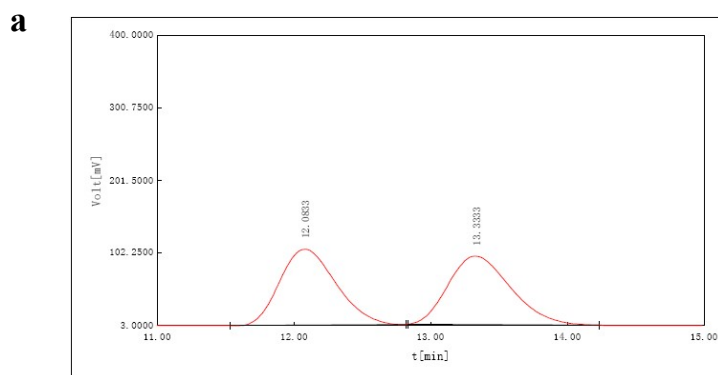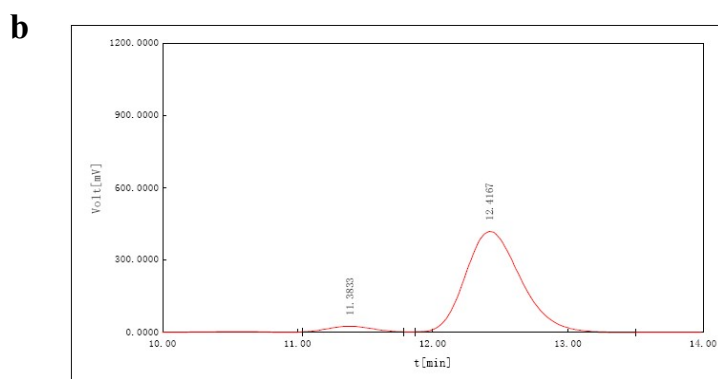

**c**

| Serial Number | Retention Time[min] | Area[mAbs*s] | Type | Area%   |
|---------------|---------------------|--------------|------|---------|
| 1             | 11.3833             | 390.6334     | BB   | 3.2474  |
| 2             | 12.4167             | 12020.6723   | BB   | 96.8526 |
| The Total     |                     | 12411.3057   |      |         |

**Supplementary Figure 95. HPLC spectra for (*S*)-2-(1-(4-ethoxyphenyl)-2-nitroethyl)-1*H*-pyrrole. a, Racemic standard. b, After reaction. c, The detail of integration.**



**(R)-2-(1-(4-bromophenyl)-2-nitroethyl)-1H-pyrrole:**

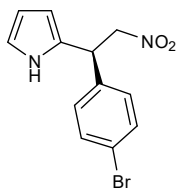

The product was prepared in 90% yield with spectral properties reported in literature. Ee was determined by HPLC with a chiralcel AD-H column: hexane/iPrOH = 90/10; flow rate = 1.0 mL/min;  $t_{\text{major}} = 12.77$  min,  $t_{\text{minor}} = 14.13$  min; ee = 99%.  $^1\text{H}$  NMR (400 MHz,  $\text{CDCl}_3$ )  $\delta$ : 7.85 (br, 1 H), 7.46-7.50 (m, 2 H), 7.09-7.13 (m, 2 H), 6.71 (m, 1 H), 6.16 (dd,  $J = 6.0$  Hz, 2.8 Hz, 1 H), 6.07 (m, 1 H), 4.98 (dd,  $J = 12.4$  Hz, 7.2 Hz, 1 H), 4.86 (t,  $J = 8.0$  Hz, 1 H), 4.78 (dd,  $J = 12.0$  Hz, 8.0 Hz, 1 H).

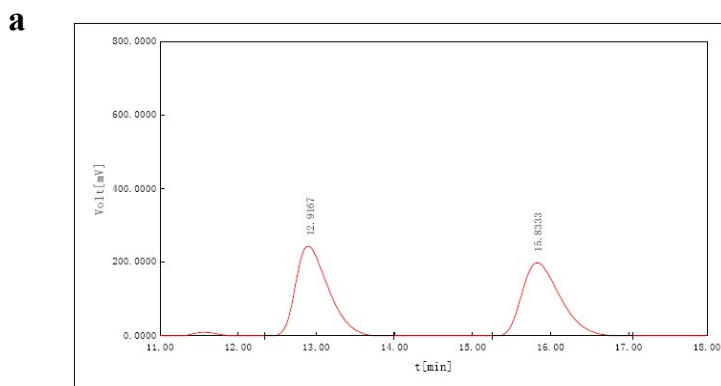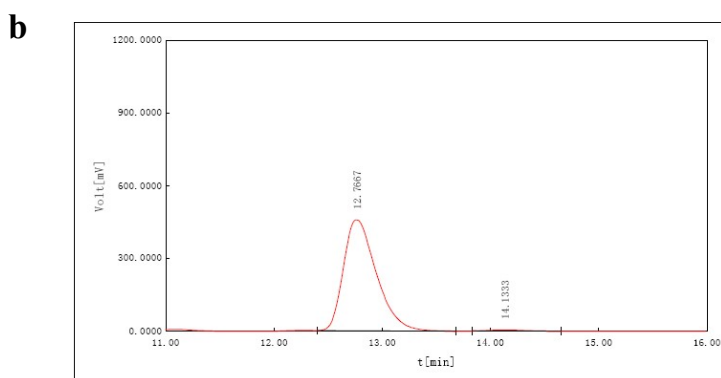

**c**

| Serial Number | Retention Time[min] | Area[mAbs*s] | Type | Area%   |
|---------------|---------------------|--------------|------|---------|
| 1             | 12.7667             | 9683.5348    | BB   | 99.3570 |
| 2             | 14.1333             | 62.6681      | BB   | 0.6430  |
| The Total     |                     | 9746.2029    |      |         |

**Supplementary Figure 96. HPLC spectra for (*R*)-2-(1-(4-bromophenyl)-2-nitroethyl)-1*H*-pyrrole. a, Racemic standard. b, After reaction. c, The detail of integration.**

**(R)-2-(1-(4-methoxycarbonyl)-2-nitroethyl)-1H-pyrrole:**

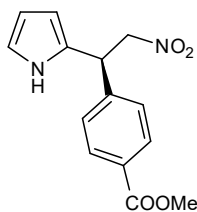

The product was prepared in 90% yield with spectral properties reported in literature. Ee was determined by HPLC with a chiralcel AD-H column: hexane/iPrOH = 90/10; flow rate = 1.0 mL/min;  $t_{\text{minor}} = 21.03$  min,  $t_{\text{major}} = 32.35$  min; ee = 88%.  $^1\text{H}$  NMR (400 MHz,  $\text{CDCl}_3$ )  $\delta$ : 7.93 (br, 1 H), 8.00-8.03 (m, 2 H), 7.30-7.33 (m, 2 H), 6.71 (m, 1 H), 6.17 (m, 1 H), 6.08 (m, 1 H), 5.00 (dd,  $J = 11.4$  Hz, 7.0 Hz, 1 H), 4.96 (t,  $J = 7.0$  Hz, 1 H), 4.83 (dd,  $J = 11.6$  Hz, 6.4 Hz, 1 H).

**a**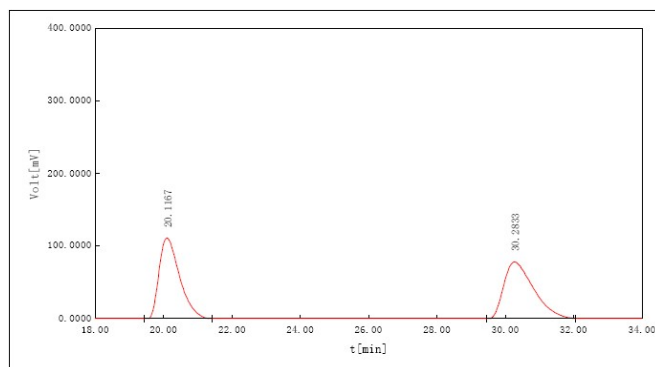**b**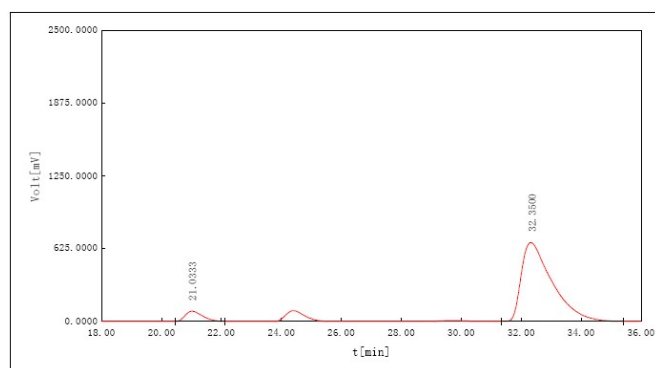**c**

| Serial Number | Retention Time[min] | Area[mAbs*s] | Type | Area%   |
|---------------|---------------------|--------------|------|---------|
| 1             | 21.0333             | 3218.9686    | BB   | 6.1475  |
| 2             | 32.3500             | 49134.2705   | BB   | 93.8525 |
| The Total     |                     | 52362.2391   |      |         |

**Supplementary Figure 97. HPLC spectra for (R)-2-(1-(4-methoxycarbonyl)-2-nitroethyl)-1 H-pyrrole. a, Racemic standard. b, After reaction. c, The detail of integration.**

**(R)-2-(1-(2-methoxyphenyl)-2-nitroethyl)-1H-pyrrole:**

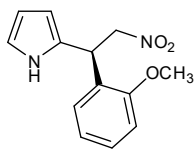

The product was prepared in 87% yield with spectral properties reported in literature. Ee was determined by HPLC with a chiralcel AD-H column: hexane/iPrOH = 95/5; flow rate = 1.0 mL/min;  $t_{\text{major}} = 18.00$  min,  $t_{\text{minor}} = 21.37$  min; ee = 88%.  $^1\text{H}$  NMR (400 MHz,  $\text{CDCl}_3$ )  $\delta$ : 8.28 (br, 1 H), 7.24-7.29 (m, 1H), 7.06 (dd,  $J = 7.2$  Hz, 1.6 Hz, 1 H), 6.89-6.95 (m, 2 H), 6.68 (m, 1 H), 6.14 (m, 1 H), 6.10 (m, 1 H), 5.22 (m, 1 H), 4.92-4.95 (m, 2 H), 3.92 (s, 3 H).

**a**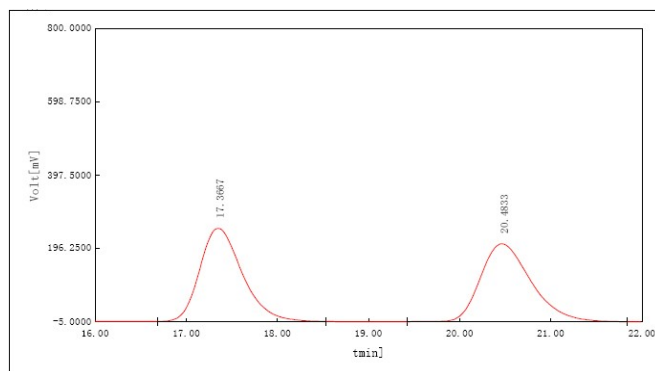**b**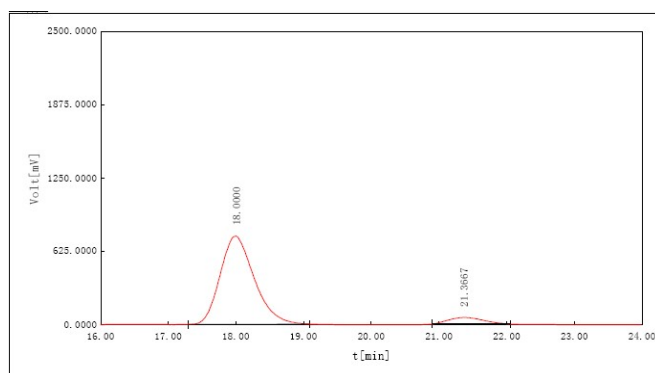**c**

| Serial Number | Retention Time[min] | Area[mAbs*s] | Type | Area%   |
|---------------|---------------------|--------------|------|---------|
| 1             | 18.0000             | 26571.5244   | BB   | 94.1535 |
| 2             | 21.3667             | 1649.9697    | BB   | 5.9465  |
| The Total     |                     | 28221.4941   |      |         |

**Supplementary Figure 98. HPLC spectra for (*R*)-2-(1-(2-methoxyphenyl)-2-nitroethyl)-1*H*-pyrrole. a, Racemic standard. b, After reaction. c, The detail of integration.**

**(R)-2-(1-(3-chlorophenyl)-2-nitroethyl)-1H-pyrrole:**

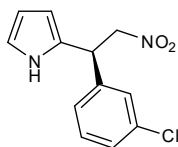

The product was prepared in 82% yield with spectral properties reported in literature. Ee was determined by HPLC with a chiralcel AD-H column: hexane/iPrOH = 90/10; flow rate = 1.0 mL/min;  $t_{\text{major}} = 9.25$  min,  $t_{\text{minor}} = 10.15$  min; ee = 91%.  $^1\text{H NMR}$  (400 MHz,  $\text{CDCl}_3$ )  $\delta$ : 7.89 (br, 1 H), 7.28-7.29 (m, 2 H), 7.22 (m, 1 H), 7.11-7.14 (m, 1 H), 6.72 (m, 1 H), 6.17 (dd,  $J = 6.4$  Hz, 2.8 Hz, 1 H), 6.08 (m, 1 H), 4.97 (dd,  $J = 12.0$  Hz, 7.0 Hz, 1 H), 4.88 (t,  $J = 8.0$  Hz, 1 H), 4.79 (dd,  $J = 12.0$  Hz, 8.0 Hz, 1 H).

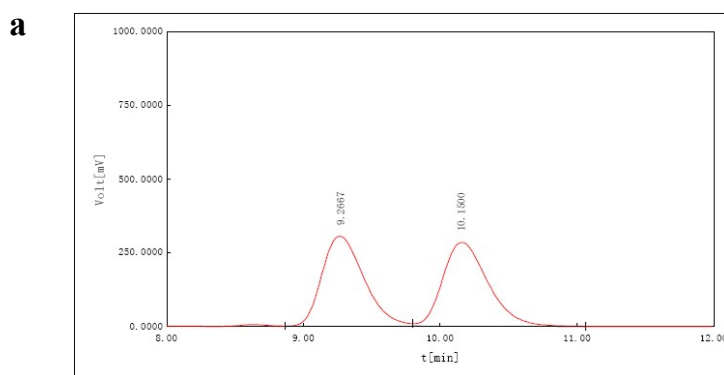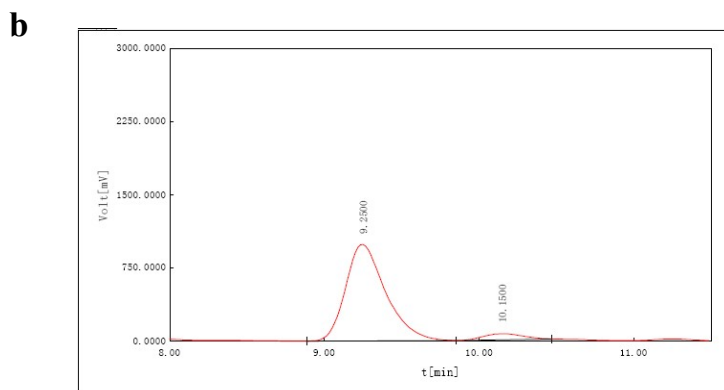

**c**

| Serial Number | Retention Time[min] | Area[mAbs*s] | Type | Area%   |
|---------------|---------------------|--------------|------|---------|
| 1             | 9.2500              | 17942.1076   | BB   | 95.3543 |
| 2             | 10.1500             | 874.1476     | BB   | 4.7457  |
| The Total     |                     | 18816.2543   |      |         |

**Supplementary Figure 99. HPLC spectra for (R)-2-(1-(3-chlorophenyl)-2-nitroethyl)-1H-pyrrole. a, Racemic standard. b, After reaction. c, The detail of integration.**

## Recycling 1-Mg in Friedel-Crafts alkylation reaction.

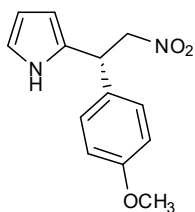

Ee was determined by HPLC with a chiralcel OD-H column: hexane/iPrOH = 80/20; flow rate = 1.0 mL/min.

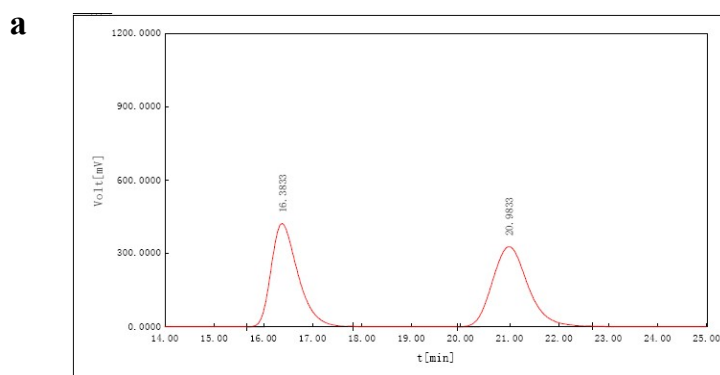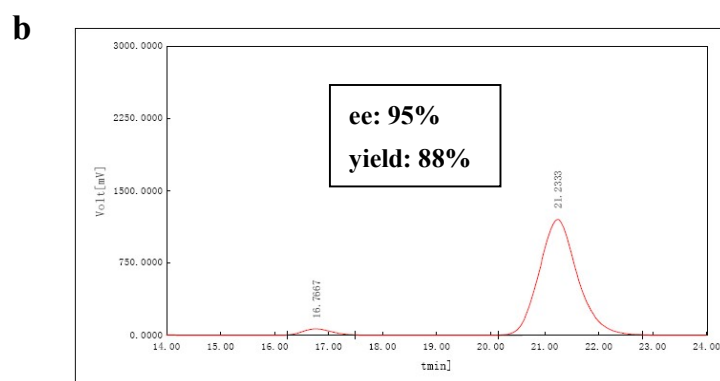

**c**

| Serial Number | Retention Time[min] | Area[mAbs*s] | Type | Area%   |
|---------------|---------------------|--------------|------|---------|
| 1             | 16.7667             | 1490.8938    | BB   | 2.4386  |
| 2             | 21.2333             | 59646.3888   | BB   | 97.5614 |
| The Total     |                     | 61137.2826   |      |         |

**Supplementary Figure 100. HPLC spectra for the second run. a, Racemic standard. b, After reaction. c, The detail of integration.**



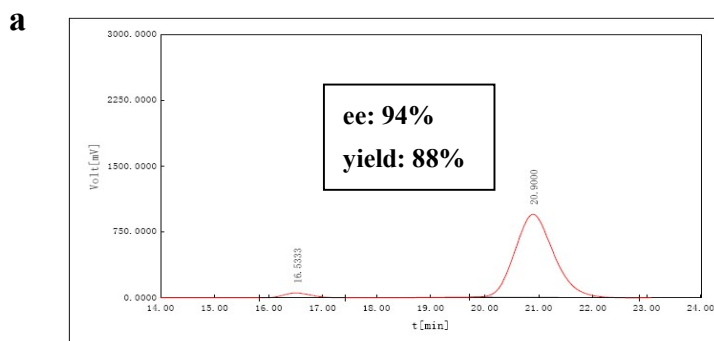

**b**

| Serial Number | Retention Time[min] | Area[mAbs*s] | Type | Area%   |
|---------------|---------------------|--------------|------|---------|
| 1             | 16.5333             | 2074.4006    | BB   | 3.1390  |
| 2             | 20.9000             | 47327.3584   | BB   | 96.6610 |
| The Total     |                     | 49401.7590   |      |         |

**Supplementary Figure 101. HPLC spectra for the third run. a, After reaction. b, The detail of integration.**

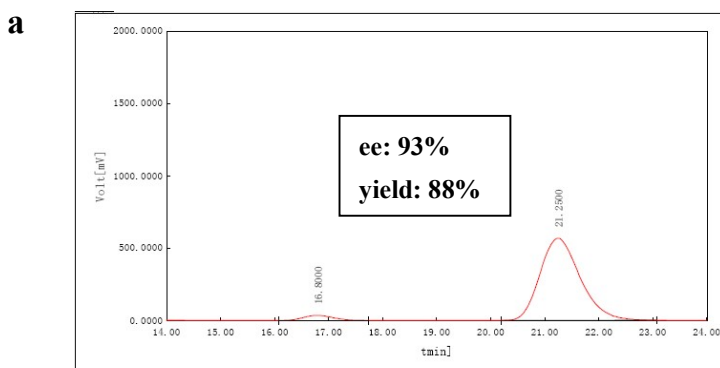

**b**

| Serial Number | Retention Time[min] | Area[mAbs*s] | Type | Area%   |
|---------------|---------------------|--------------|------|---------|
| 1             | 16.8000             | 1062.7238    | BB   | 3.4638  |
| 2             | 21.2500             | 29618.1402   | BB   | 96.5362 |
| The Total     |                     | 30680.8640   |      |         |

**Supplementary Figure 102. HPLC spectra for the fourth run. a, After reaction. b, The detail of integration.**

**A bioactive compounds obtained from asymmetric Friedel-Crafts alkylation catalyzed by 1-Mg**

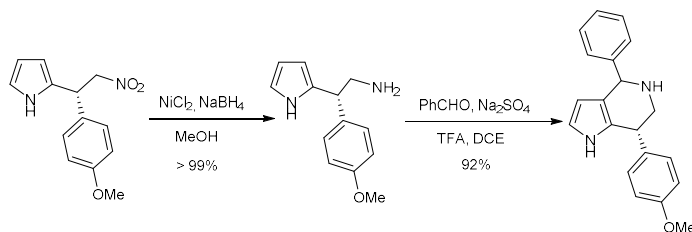

(7S)-4-phenyl-7-(4-methoxyphenyl)-4,5,6,7-tetrahydro-1H-pyrrolo[3,2-c]pyridine:

The desired compound was prepared according to the literature report to give the product in 86% yield with spectral properties reported in literature. Ee was determined by HPLC with a chiralcel OJ-H column: hexane/iPrOH = 90/10; flow rate = 2.0 mL/min;  $t_{\text{minor}} = 32.87$  min,  $t_{\text{major}} = 45.75$  min; ee = 94%.  $^1\text{H}$  NMR (400MHz,  $\text{CDCl}_3$ )  $\delta$ : 7.66 (br, 1H), 7.32-7.41 (m, 5H), 7.12 (d,  $J = 8.4\text{Hz}$ , 2H), 6.87 (d,  $J = 8.4\text{Hz}$ , 2H), 6.60 (m, 1H), 5.76 (m, 1H), 5.12 (d, 1H), 4.13 (m, 1H), 3.81 (s, 3H), 3.45 (dd,  $J = 12.6\text{Hz}$ , 5.4Hz, 1H), 2.99 (dd,  $J = 12.6, 9.4$  Hz, 1H).

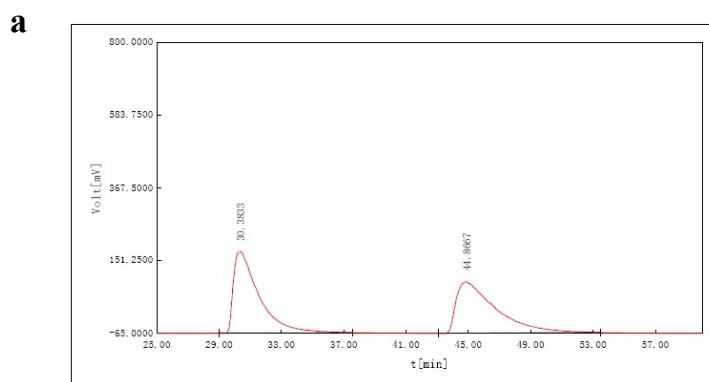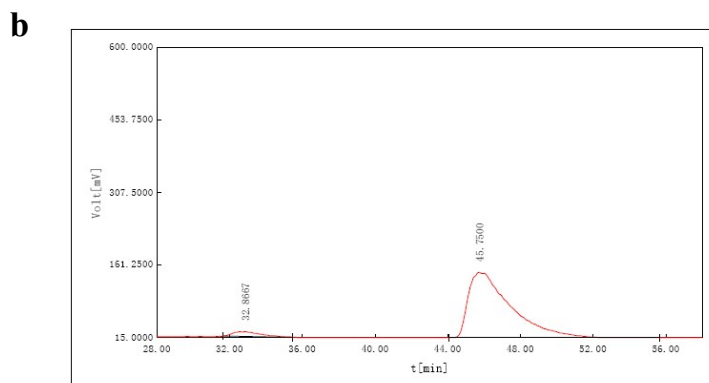

**c**

| Serial Number | Retention Time[min] | Area[mAbs*s] | Type | Area%   |
|---------------|---------------------|--------------|------|---------|
| 1             | 32.8667             | 755.6563     | BB   | 3.2447  |
| 2             | 45.7500             | 22533.2842   | BB   | 96.7553 |
| The Total     |                     | 23288.9405   |      |         |

**Supplementary Figure 103. HPLC spectra for (7S)-4-phenyl-7-(4-methoxy phenyl)-4,5,6,7-tetrahydro-1H-pyrrolo[3,2-c]pyridine. a, Racemic standard. b, After reaction. c, The detail of integration.**

**(S)-Phenyl methyl sulfoxide:**

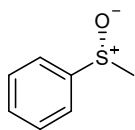

The compound was obtained in 93 % yield. Enantiomeric excess was determined by HPLC with a chiralcel OD-H column: hexane/iPrOH = 90/10; flow rate = 1.0 mL/min;  $t_{\text{major}} = 13.73 \text{ min}$ ,  $t_{\text{minor}} = 20.08 \text{ min}$ ; ee = 92%.  $^1\text{H NMR}$  (400 MHz,  $\text{CDCl}_3$ )  $\delta$ : 2.72 (s, 3H,  $\text{CH}_3$ ), 7.51-7.53 (m, 3H, ArH), 7.64-7.66 (m, 2H, ArH).

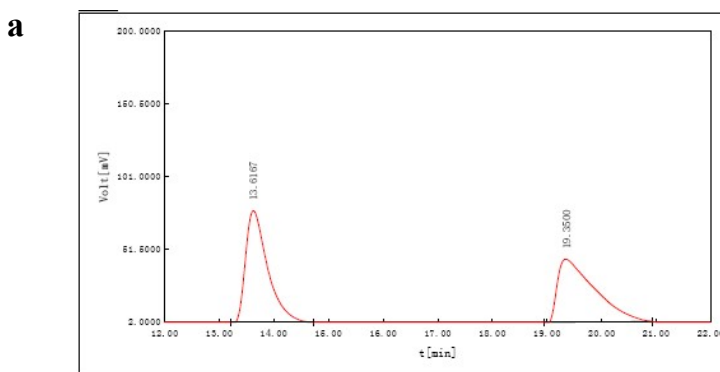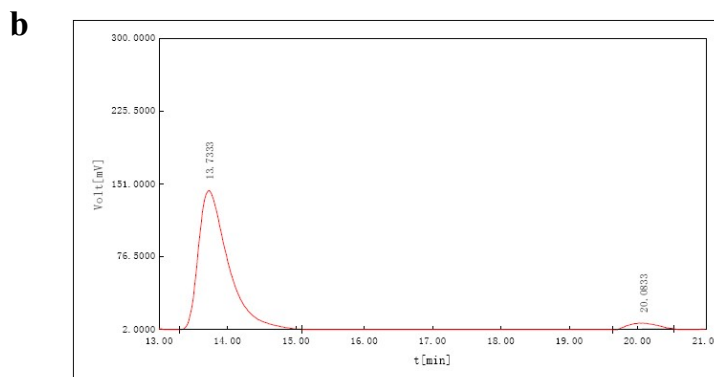

**c**

| Serial Number | Retention Time[min] | Area[mAbs*s] | Type | Area%   |
|---------------|---------------------|--------------|------|---------|
| 1             | 13.7333             | 4348.0603    | BB   | 95.7683 |
| 2             | 20.0833             | 192.1271     | BB   | 4.2317  |
| The Total     |                     | 4540.1874    |      |         |

**Supplementary Figure 104. HPLC spectra for (S)-Phenyl methyl sulfoxide. a, Racemic standard. b, After reaction. c, The detail of integration.**

**(S)-*p*-Tolyl methyl sulfoxide:**

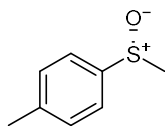

The product was obtained in 95 % yield. ee was determined by HPLC with a chiralcel OD-H column: hexane/iPrOH = 90/10; flow rate = 1.0 mL/min;  $t_{\text{major}} = 12.60$  min,  $t_{\text{minor}} = 14.75$  min; ee = 93%.  $^1\text{H NMR}$  (400 MHz,  $\text{CDCl}_3$ )  $\delta$ : 2.40 (s, 3H, Ar- $\text{CH}_3$ ), 2.69 (s, 3H,  $\text{CH}_3$ ), 7.32 (d,  $J = 8.0$  Hz, 2H, ArH), 7.53 (d,  $J = 8.0$  Hz, 2H, ArH).

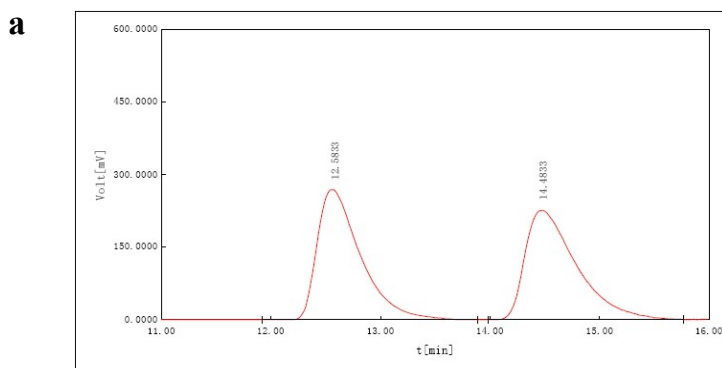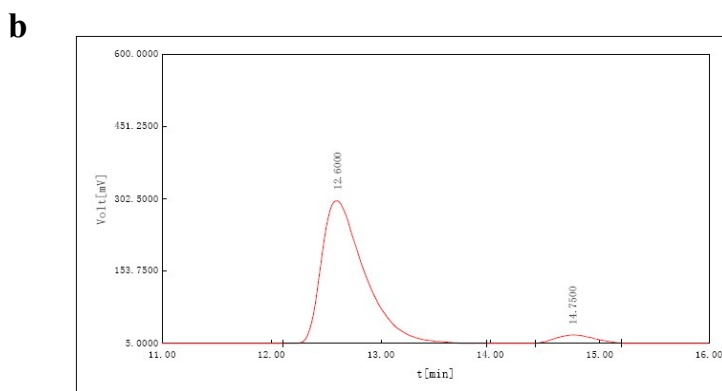

**c**

| Serial Number | Retention Time[min] | Area[mAbs*s] | Type | Area%   |
|---------------|---------------------|--------------|------|---------|
| 1             | 12.6000             | 83049.3312   | BB   | 96.3174 |
| 2             | 14.7500             | 317.5079     | BB   | 3.6826  |
| The Total     |                     | 8621.8402    |      |         |

**Supplementary Figure 105. HPLC spectra for (S)-*p*-Tolyl methyl sulfoxide. a,** Racemic standard. **b,** After reaction. **c,** The detail of integration.

**(S)-*p*-Methoxyphenyl methyl sulfoxide:**

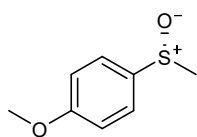

The product was obtained in 92 % yield. ee was determined by HPLC with a chiralcel OD-H column: hexane/iPrOH = 90/10; flow rate = 1.0 mL/min;  $t_{\text{major}} = 21.45$  min,  $t_{\text{minor}} = 26.58$  min; ee = 84%.  $^1\text{H NMR}$  (400 MHz,  $\text{CDCl}_3$ )  $\delta$ : 2.68 (s, 3H,  $\text{CH}_3$ ), 3.84 (s, 3H,  $\text{OCH}_3$ ), 7.01 (d,  $J = 8.8$ , 2H, ArH), 7.58 (dt,  $J = 8.8$ , 2H, ArH).

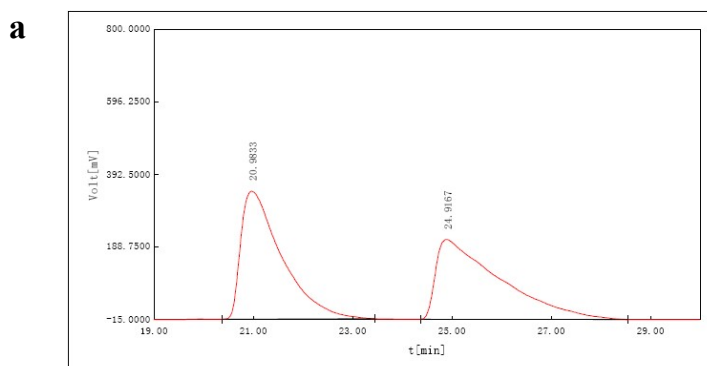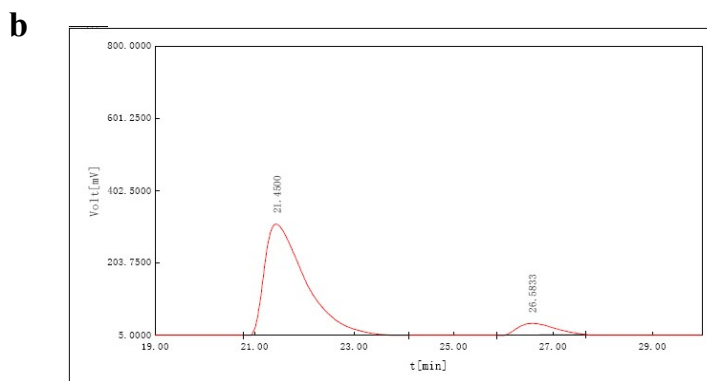

**c**

| Serial Number | Retention Time[min] | Area[mAbs*s] | Type | Area%   |
|---------------|---------------------|--------------|------|---------|
| 1             | 21.4500             | 18554.3601   | BB   | 91.8524 |
| 2             | 26.5833             | 1645.8308    | BB   | 8.1476  |
| The Total     |                     | 20200.1909   |      |         |

**Supplementary Figure 106. HPLC spectra for (S)-*p*-Methoxyphenyl methyl sulfoxide. a, Racemic standard. b, After reaction. c, The detail of integration.**

**(S)-*p*-Chlorophenyl methyl sulfoxide:**

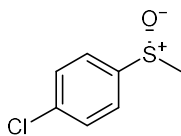

The product was obtained in 94 % yield. Ee was determined by HPLC with a chiralcel OD-H column: hexane/*i*PrOH = 95/5; flow rate = 1.0 mL/min;  $t_{\text{major}} = 24.17$  min,  $t_{\text{minor}} = 25.97$  min; ee = 89%.  $^1\text{H NMR}$  (400 MHz,  $\text{CDCl}_3$ )  $\delta$ : 2.71 (s, 3H,  $\text{CH}_3$ ), 7.51 (d,  $J = 8.4$  Hz, 2H, ArH), 7.58 (d,  $J = 8.4$  Hz, 2H, ArH).

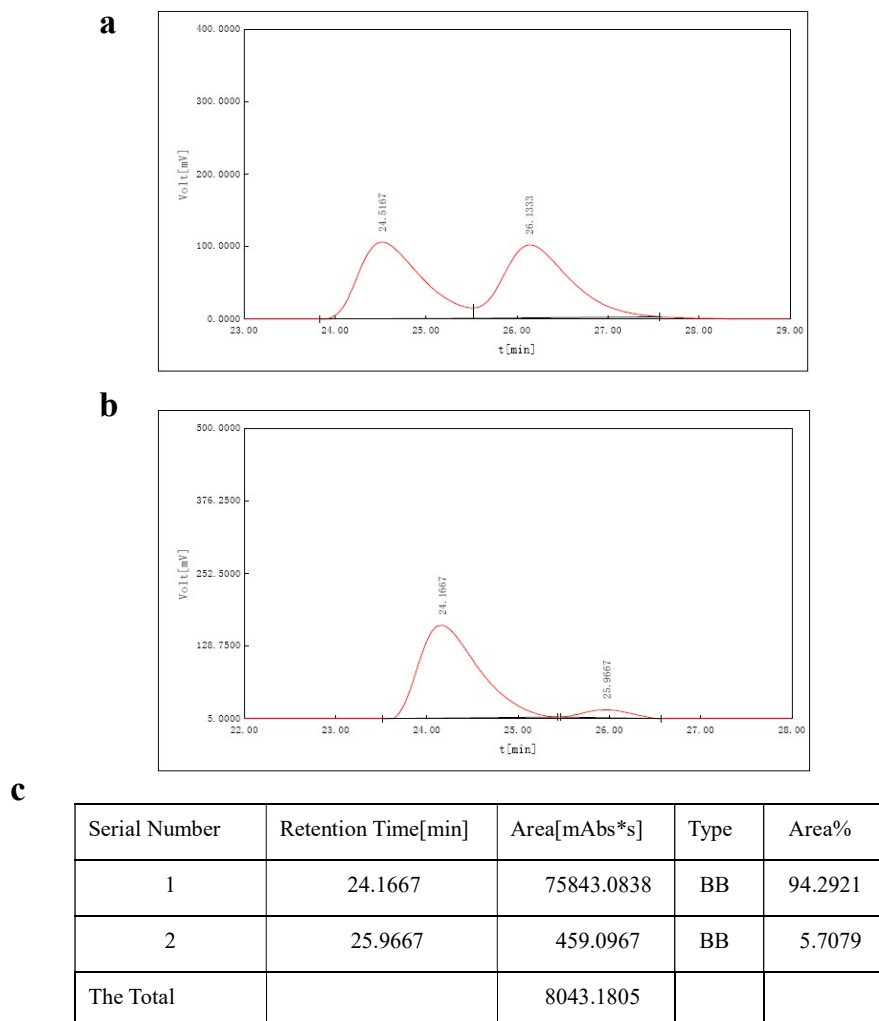

**Supplementary Figure 107. HPLC spectra for (S)-*p*-Chlorophenyl methyl sulfoxide. a, Racemic standard. b, After reaction. c, The detail of integration.**

**(S)-*m*-Methoxyphenyl methyl sulfoxide:**

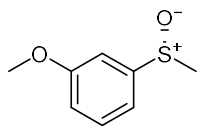

The product was obtained in 86 % yield. ee was determined by HPLC with a chiralcel OD-H column: hexane/iPrOH = 90/10; flow rate = 1.0 mL/min;  $t_{\text{major}} = 15.60$  min,  $t_{\text{minor}} = 24.03$  min; ee = 55%.  $^1\text{H NMR}$  (400 MHz,  $\text{CDCl}_3$ )  $\delta$ : 2.70 (s, 3H,  $\text{CH}_3$ ), 3.84 (s, 3H,  $\text{OCH}_3$ ), 6.98-7.00 (m, 1H, ArH), 7.10-7.12 (m, 1H, ArH), 6.23-7.24 (m, 1H, ArH), 7.37-7.41 (m, 1H, ArH).

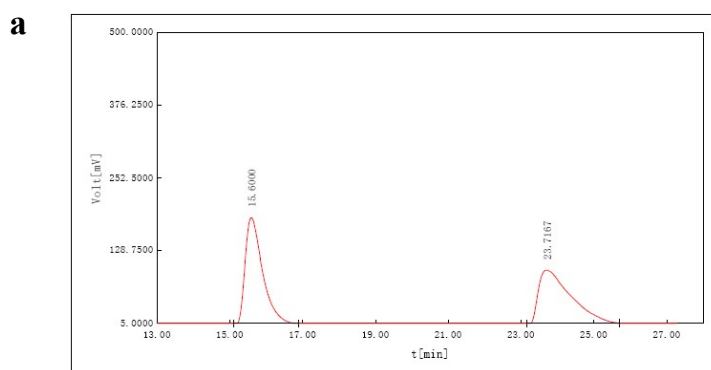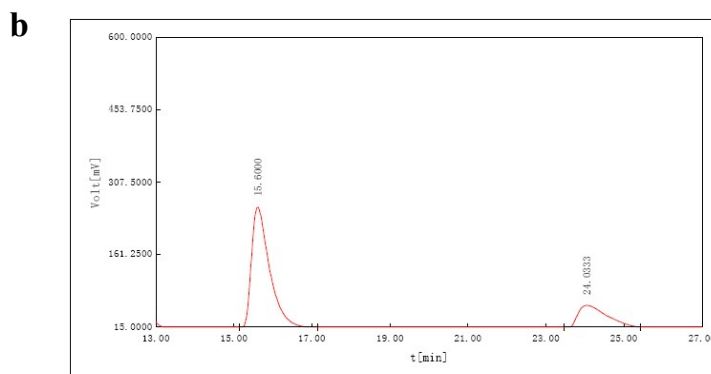

**c**

| Serial Number | Retention Time[min] | Area[mAbs*s] | Type | Area%   |
|---------------|---------------------|--------------|------|---------|
| 1             | 15.6000             | 8187.0763    | BB   | 77.5604 |
| 2             | 24.0333             | 2238.6665    | BB   | 22.4396 |
| The Total     |                     | 10555.7428   |      |         |

**Supplementary Figure 108. HPLC spectra for (S)-*m*-Methoxyphenyl methyl sulfoxide. a, Racemic standard. b, After reaction. c, The detail of integration.**



**(S)-*m*-Fluorophenyl methyl sulfoxide:**

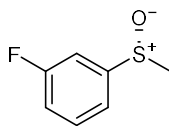

The product was obtained in 91 % yield. Ee was determined by HPLC with a chiralcel OD-H column: hexane/*i*PrOH = 90/10; flow rate = 1.0 mL/min;  $t_{\text{major}} = 12.30$  min,  $t_{\text{minor}} = 14.28$  min; ee = 87 %.  $^1\text{H}$  NMR (400 MHz,  $\text{CDCl}_3$ )  $\delta$ : 2.73 (s, 3H,  $\text{CH}_3$ ), 7.16-7.21 (m, 1H, ArH), 7.37-7.47 (m, 2H, ArH), 7.49-7.53 (m, 1H, ArH).

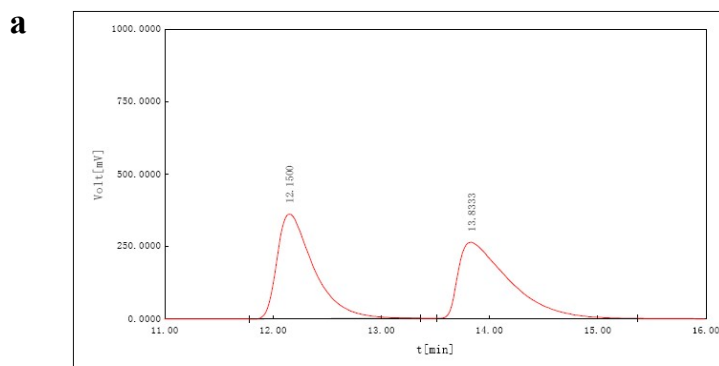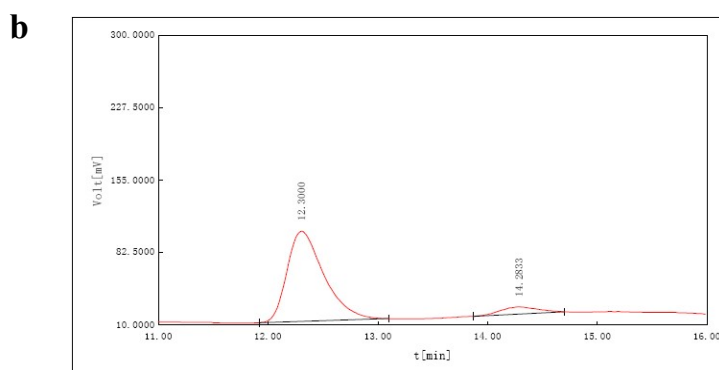

**c**

| Serial Number | Retention Time[min] | Area[mAbs*s] | Type | Area%   |
|---------------|---------------------|--------------|------|---------|
| 1             | 12.3000             | 2133.3686    | BB   | 93.6035 |
| 2             | 14.2833             | 145.7861     | BB   | 6.3965  |
| The Total     |                     | 2279.1548    |      |         |

**Supplementary Figure 109. HPLC spectra for (S)-*m*-Fluorophenyl methyl sulfoxide. a, Racemic standard. b, After reaction. c, The detail of integration.**

## Recycling 1-Mn in oxidation of *p*-tolyl methyl sulfide

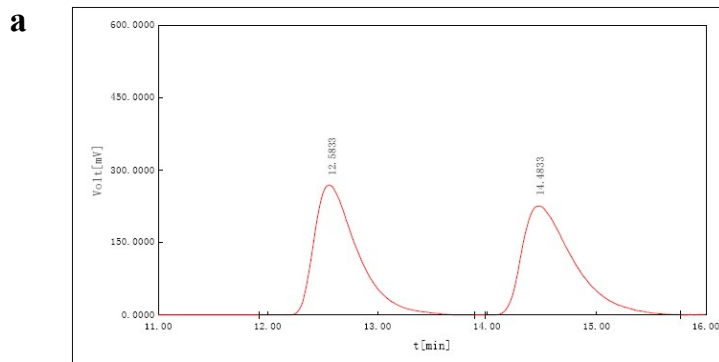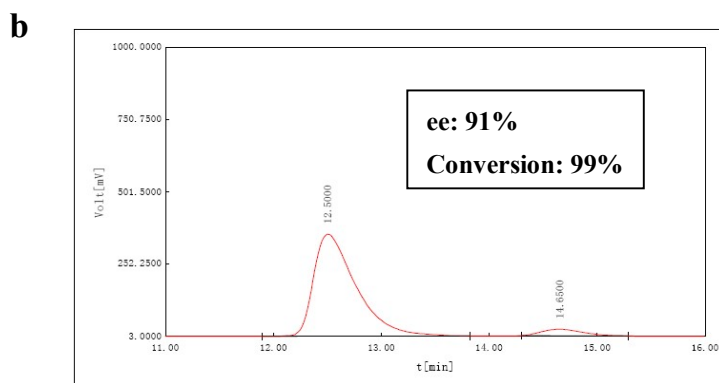

**c**

| Serial Number | Retention Time[min] | Area[mAbs*s] | Type | Area%   |
|---------------|---------------------|--------------|------|---------|
| 1             | 12.5000             | 9806.0065    | BB   | 95.3317 |
| 2             | 14.6500             | 480.1905     | BB   | 4.6683  |
| The Total     |                     | 10286.1970   |      |         |

**Supplementary Figure 110. HPLC spectra for the second run. a,** Racemic standard. **b,** After reaction. **c,** The detail of integration.

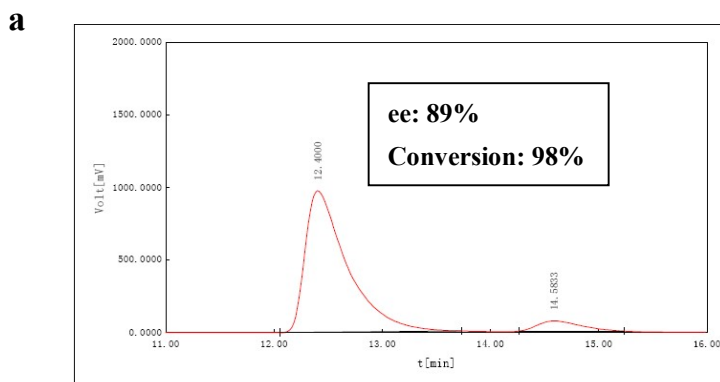

**b**

| Serial Number | Retention Time[min] | Area[mAbs*s] | Type | Area%   |
|---------------|---------------------|--------------|------|---------|
| 1             | 12.4000             | 26503.6020   | BB   | 94.1688 |
| 2             | 14.5833             | 1641.1784    | BB   | 5.8412  |
| The Total     |                     | 28144.7804   |      |         |

**Supplementary Figure 103. HPLC spectra for the third run. a, After reaction. b, The detail of integration.**

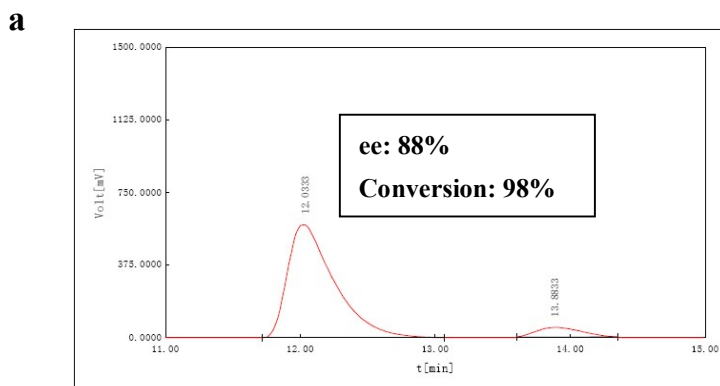

**b**

| Serial Number | Retention Time[min] | Area[mAbs*s] | Type | Area%   |
|---------------|---------------------|--------------|------|---------|
| 1             | 12.0333             | 14474.9395   | BB   | 93.8343 |
| 2             | 13.8833             | 951.1249     | BB   | 6.1657  |
| The Total     |                     | 15426.0644   |      |         |

**Supplementary Figure 111. HPLC spectra for the fourth run. a, After reaction. b, The detail of integration.**

### 2-Phenyl-1,2,3,4-tetrahydroquinoxaline:

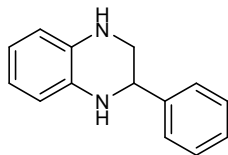

$^1\text{H}$  NMR (400 MHz,  $\text{CDCl}_3$ )  $\delta$ : 7.47-7.31 (m, 5H), 6.73-6.56 (m, 4H), 4.52 (d,  $J = 5.9$  Hz, 1H), 3.50 (d,  $J = 12.5$  Hz, 1H), 3.41-3.30 (m, 1H).

### Supplementary References.

1. Rueping, M., Tato, F. & Schoepke, F. R. The First General, Efficient and Highly Enantioselective Reduction of Quinoxalines and Quinoxalinones. *Chem. Eur. J.* **16**, 2688-2691 (2010)
2. Kobayashi, S., Endo, T., Schneider, U. & Ueno, M. Aldehyde allylation with allylboronates providing  $\alpha$ -addition products. *Chem. Commun.* **46**, 1260-1262 (2010).
3. Li, W., Su, Z. & Hu, C. Mechanism of Ketone Allylation with Allylboronates as Catalyzed by Zinc Compounds: A DFT Study. *Chem. Eur. J.* **19**, 124-134 (2013).
4. Kobayashi, S., Endo, T., Yoshino, T., Schneider, U. & Ueno, M. Allylation Reactions of Aldehydes with Allylboronates in Aqueous Media: Unique Reactivity and Selectivity that are Only Observed in the Presence of Water. *Chem. – Asian. J.* **8**, 2033-2045 (2013)
5. Dolomanov, O. V., Bourhis, L., Gildea R., Howard, J., Puschmann, H. OLEX2: A complete structure solution, refinement and analysis program, *J. Appl. Crystallogr.* **42**, 339-341 (2009)
